# Supplementary material
Source: PubMed Central journal article supplement (PMC4156862)

# Z-selective olefin metathesis on peptides: Investigation of side chain influence, preorganization, and guidelines in substrate selection

Shane L. Mangold,<sup>†</sup> Daniel J. O'Leary,<sup>\*,§</sup> and Robert H. Grubbs<sup>\*,†</sup>

<sup>†</sup> Arnold and Mabel Beckman Laboratories for Chemical Synthesis, Division of Chemistry and Chemical Engineering, California Institute of Technology, Pasadena, California 91125, United States and

<sup>§</sup> Department of Chemistry, Pomona College, Claremont, California 91711, United States

## Supporting Information

## Table of Contents

|                                                                              |                |
|------------------------------------------------------------------------------|----------------|
| <b>General Information</b>                                                   | <b>S3-S4</b>   |
| <b>General procedure for homoallyl modification of amino acids</b>           | <b>S4</b>      |
| <b>Characterization data of homoallyl-modified amino acids</b>               | <b>S5-S13</b>  |
| <b>General procedure for homodimerization of amino acids</b>                 | <b>S13</b>     |
| <b>Characterization data for homodimerized amino acids</b>                   | <b>S13-S20</b> |
| <b>General procedure for cross metathesis of amino acids</b>                 | <b>S20</b>     |
| <b>Characterization data for cross metathesis products</b>                   | <b>S20-S21</b> |
| <b>Procedures for synthesis of allyl-modified amino acids</b>                | <b>S21</b>     |
| <b>Characterization data for allyl-modified amino acids</b>                  | <b>S21-S23</b> |
| <b>Procedure for homodimerization of allyl-modified amino acids</b>          | <b>S24</b>     |
| <b>Characterization data for homodimerized allyl-modified amino acids</b>    | <b>S24-S25</b> |
| <b>General procedure for cross metathesis of allyl-modified amino acids</b>  | <b>S25</b>     |
| <b>Characterization data for allyl-modified amino acid cross products</b>    | <b>S25-S27</b> |
| <b>General procedure for the synthesis of homoallyl-modified peptides</b>    | <b>S27</b>     |
| <b>Characterization data for homoallyl-modified peptides</b>                 | <b>S27-S28</b> |
| <b>General procedure for cross metathesis of homoallyl-modified peptides</b> | <b>S28</b>     |

|                                                                                       |                 |
|---------------------------------------------------------------------------------------|-----------------|
| <b>HPLC of cross metathesis on homoallyl-modified peptides</b>                        | <b>S29</b>      |
| <b>Solid-phase synthesis of olefinic peptides</b>                                     | <b>S30</b>      |
| <b>General procedure for Z-selective RCM on peptides</b>                              | <b>S31</b>      |
| <b>LC/MS TOF to monitor conversion of RCM on peptides</b>                             | <b>S32</b>      |
| Conversion of peptide <b>16</b> to product <b>17</b>                                  | S33–35          |
| Conversion of peptide <b>18</b> to product <b>19</b>                                  | S36–38          |
| <b>HPLC of purified stapled peptides</b>                                              | <b>S35</b>      |
| Macrocyclic peptide <b>17</b>                                                         | S35             |
| Macrocyclic peptide <b>19</b>                                                         | S39             |
| <b>MALDI-TOF characterization data of stapled peptides</b>                            | <b>S36</b>      |
| Macrocyclic peptide <b>17</b>                                                         | S36             |
| Macrocyclic peptide <b>19</b>                                                         | S39             |
| <b>General procedure for RCM on Aib-containing peptides bearing i, i+3 crosslinks</b> | <b>S40</b>      |
| <b>Characterization data for RCM on Aib-rich peptides</b>                             | <b>S40</b>      |
| <b>HPLC of Aib-rich macrocyclic peptides</b>                                          | <b>S41</b>      |
| Conversion of peptide <b>20</b> to product <b>21</b>                                  | <b>S41-43</b>   |
| Conversion of peptide <b>24</b> to product <b>25</b>                                  | <b>S44-46</b>   |
| <b>NMR spectra</b>                                                                    | <b>S47-S150</b> |

### **General Information**

All reactions were carried out in dry glassware under an atmosphere of argon using standard Schlenk line techniques. Cyclometalated ruthenium catalysts **1** and **2** were obtained from Materia, Inc. and used as received. All solvents were purified by passage through solvent purification columns and further degassed by bubbling argon. Commercially available reagents were used as received unless otherwise noted. Solid substrates were used after purification by column chromatography (SiO<sub>2</sub>; (230-400 mesh)). Thin-layer chromatography utilized EMD Sciences silica gel 60 F254 pre-cast glass plates (Cat. No. 1.05714.0001). Microwave-assisted chemistry utilized a Biotage Initiator 2.5 reactor. Wang resin, MBHA resin, and TentaGel MB RAM resin were purchased from Novabiochem or RAPP Polymere. All Boc-protected or Fmoc-protected amino acids were purchased from ChemImpex or Peptides International. Fmoc-(S)-2-(4-pentenyl)alanine or Fmoc-(R)-2-(7-

octenyl)alanine were synthesized as previously described<sup>1</sup> and confirmed by spectroscopic analysis (NMR). HBTU (N,N,N',N'-tetramethyl-O-(1H-benzotriazol-1-yl)uranium hexafluorophosphate), HATU (1-[Bis(dimethylamino)methylene]-1H-1,2,3-triazolo[4,5-b]pyridinium 3-oxid hexafluorophosphate), and HOBt (1-hydroxybenzotriazole) were purchased from NovaBioChem. Piperidine, trifluoroacetic acid (TFA), triisopropylsilane (TIPS), and N,N'-dimethylformamide (DMF) were purchased from Sigma-Aldrich. Triethylamine (TEA) or N,N-diisopropylethylamine (DIEA) were purchased from Sigma-Aldrich and distilled prior to use.

Standard NMR spectroscopy experiments were conducted on a Varian INOVA 500 (<sup>1</sup>H: 500 MHz, <sup>13</sup>C: 125 MHz) or Varian INOVA 300 (<sup>1</sup>H: 300 MHz, <sup>13</sup>C: 75 MHz) spectrometer. NMR spectra are reported as  $\delta$  values in ppm relative to the reported solvent (CDCl<sub>3</sub> referenced to 7.27, CD<sub>3</sub>OD referenced to 3.31). Splitting patterns are abbreviated as follows: singlet (s), doublet (d), triplet (t), quartet (q), multiplet (m), broad (b), apparent (app), and combinations thereof. Spectra were analyzed and processed using MestReNova.

High-resolution mass spectra (HRMS) data was obtained on a JEOL JMS-600H high resolution mass spectrometer operating in FAB<sup>+</sup> or positive-ion ESI mode. MALDI-TOF spectra were recorded on a Voyager DE-PRO MALDI TOF-MS spectrometer (Applied Biosystems) operating in reflector ion mode using  $\alpha$ -cyano-4-hydroxycinnamic acid as the matrix.

Analytical HPLC was performed on an Agilent 1200 Series TOF with an Agilent G1978A Multimode source in electrospray ionization (ESI), or mixed (MM) ionization mode equipped with an Eclipse Plus C<sub>8</sub> column (1.8  $\mu$ m, 2.1 x 50 mm). Preparative HPLC was performed with an Agilent 1100 Series HPLC utilizing an Agilent Eclipse XDB-C<sub>18</sub> column (5  $\mu$ m, 9.4 x 250 mm) or an Agilent Zorbax RX-SIL column (5  $\mu$ m, 9.4 x 250 mm) using a gradient of double distilled water and HPLC grade acetonitrile containing 0.1% TFA or 0.1% acetic acid (AcOH). LCMS was performed on an Agilent 1200 Series LCMS equipped with a Quadrupole 6120 MS detector and an Eclipse XDB-C<sub>18</sub> reverse-phase column (5, 4.6  $\mu$ m x 150 mm).

### **General Procedure for Homoallyl Modification of Peptides**

#### ***tert*-butyl (*S*)-(1-(but-3-en-1-ylamino)-1-oxopropan-2-yl)carbamate (**3**)**

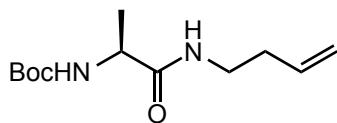

**3**: C<sub>12</sub>H<sub>22</sub>N<sub>2</sub>O<sub>3</sub>  
Exact mass: 242.1630

A round-bottom flask was charged with Boc-Ala-OH (1.0 g, 5.3 mmol), HOBt (0.72 g, 5.3 mmol, 1.0 eq) and HBTU (3.0 g, 7.9 mmol, 1.5 eq) under Ar(g). To this was added anhydrous DMF (5 mL) and N,N-diisopropylethylamine (DIEA, 2.7 mL, 15.8 mmol, 3 eq.). The reaction mixture

<sup>1</sup> Bird, G.H.; Crannell, W.C.; Walensky, L.D. *Curr. Protoc. Chem. Biol.* **2011**, *3*, 99.

was allowed to stir at room temperature for 15 min upon which the solution turned to a pale yellow. A solution of 3-butenylamine-HCl (0.85 g, 7.9 mmol, 1.5 eq) in DMF (2 mL) was added and the reaction mixture heated to 50°C and allowed to stir for 1 h. The solution was cooled to room temperature and H<sub>2</sub>O (20 mL) was added, followed by CH<sub>2</sub>Cl<sub>2</sub> (50 mL). The organic layer was removed and the aqueous layer was extracted with CH<sub>2</sub>Cl<sub>2</sub> (5 x 50 mL). The combined organic layers were washed with brine (5 x 50 mL), and dried over Na<sub>2</sub>SO<sub>4</sub>. The solvent was removed *in vacuo* and the crude residue was purified by flash chromatography (SiO<sub>2</sub>, 0% to 50% EtOAc in hexanes) to provide 1.16 g (91%) of **3** as a white solid: <sup>1</sup>H NMR (300 MHz, CDCl<sub>3</sub>) δ 6.51 (bs, 1H), 5.72 (ddt, *J* = 17.1, 10.2, 6.8 Hz, 1H), 5.22 (d, *J* = 7.7 Hz, 1H), 5.12–4.96 (m, 2H), 4.12 (q, *J* = 7.6 Hz, 1H), 3.38–3.18 (m, 2H), 2.22 (qt, *J* = 6.9, 1.3 Hz, 2H), 1.40 (s, 9H), 1.31 (d, *J* = 7.0 Hz, 3H); <sup>13</sup>C NMR (126 MHz, CDCl<sub>3</sub>) δ 172.71, 155.48, 135.04, 117.09, 79.83, 50.02, 38.41, 33.67, 28.30 (3C), 18.64. HRMS (ESI) *m/z* calcd for C<sub>12</sub>H<sub>22</sub>N<sub>2</sub>O<sub>3</sub> [M+H]<sup>+</sup>: 243.1630, found 243.1626

***tert*-butyl (*S*)-(1-(but-3-en-1-ylamino)-3-methyl-1-oxobutan-2-yl)carbamate (5a)**

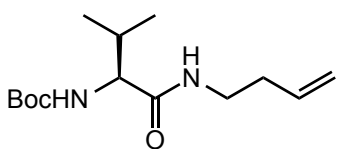

**5a:** C<sub>14</sub>H<sub>26</sub>N<sub>2</sub>O<sub>3</sub>  
Exact mass: 270.1943

Following the general procedure for the synthesis of **3**, **5a** was synthesized from Boc-Val-OH (1.1 g, 5.3 mmol) in the presence of a stock solution of HOBT (0.72 g, 5.3 mmol, 1.0 eq.), HBTU (3.0 g, 7.9 mmol, 1.5 eq.), and DIEA (2.7 mL, 15.8 mmol, 3 eq.). A solution of 3-butenylamine-HCl (0.85 g, 7.9 mmol, 1.5 eq.) in DMF (2 mL) was added and the reaction heated to 50°C and stirred for 1 h. The crude product was purified by flash chromatography (SiO<sub>2</sub>, 0% to 33% EtOAc in hexanes) to provide 1.17 g (82%) of **5a** as a white solid. <sup>1</sup>H NMR (300 MHz, CDCl<sub>3</sub>) δ 6.72–6.53 (m, 1H), 5.69 (ddt, *J* = 17.0, 10.1, 6.8 Hz, 1H), 5.32 (d, *J* = 9.3 Hz, 1H), 5.08–4.93 (m, 2H), 3.86 (dd, *J* = 9.1, 6.8 Hz, 1H), 3.36–3.15 (m, 2H), 2.19 (qt, *J* = 6.9, 1.3 Hz, 2H), 2.06–1.95 (m, 1H), 1.37 (s, 9H), 0.87 (dd, *J* = 8.2, 6.7 Hz, 6H); <sup>13</sup>C NMR (126 MHz, CDCl<sub>3</sub>) δ 171.84, 155.94, 135.10, 116.78, 79.34, 59.95, 38.50, 33.71, 30.99, 28.26 (3C), 19.19, 18.10. HRMS (ESI) *m/z* calcd for C<sub>14</sub>H<sub>26</sub>N<sub>2</sub>O<sub>3</sub> [M+H]<sup>+</sup>: 271.1943, found 271.1940

***tert*-butyl ((2*S*,3*R*)-1-(but-3-en-1-ylamino)-3-methyl-1-oxopentan-2-yl)carbamate (5b)**

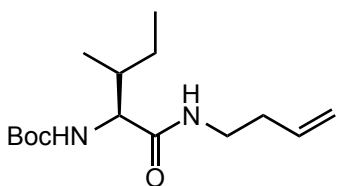

**5b:** C<sub>15</sub>H<sub>28</sub>N<sub>2</sub>O<sub>3</sub>  
Exact mass: 284.2100

Following the general procedure for the synthesis of **3**, **5b** was synthesized from Boc-Ile-OH (1.2 g, 5.3 mmol) in the presence of a stock solution of HOBT (0.72 g, 5.3 mmol, 1.0 eq.), HBTU (3.0 g, 7.9 mmol, 1.5 eq.), DIEA (2.7 mL, 15.8 mmol, 3 eq.). A solution of 3-butenylamine-HCl (0.85 g, 7.9 mmol, 1.5 eq.) in DMF (2 mL) was added and the reaction heated to 50°C and stirred for 1 h. The crude product was purified by flash chromatography (SiO<sub>2</sub>, 0% to 33% EtOAc in hexanes) to provide 1.27 g (85%) of **5b** as a white solid. <sup>1</sup>H NMR (300 MHz, CDCl<sub>3</sub>) δ 6.26 (d, *J* = 6.1 Hz, 1H), 5.73 (ddt, *J* = 17.1, 10.3, 6.8 Hz, 1H), 5.15 (d, *J* = 8.9

Hz, 1H), 5.11–4.98 (m, 2H), 3.88 (dd,  $J = 8.9, 6.7$  Hz, 1H), 3.39–3.21 (m, 2H), 2.23 (qt,  $J = 6.8, 1.3$  Hz, 2H), 1.90–1.70 (m, 1H), 1.52–1.44 (m, 1H), 1.41 (s, 9H), 1.18–0.98 (m, 1H), 0.95–0.78 (m, 6H);  $^{13}\text{C}$  NMR (126 MHz,  $\text{CDCl}_3$ )  $\delta$  171.83, 155.87, 135.13, 116.87, 79.43, 59.20, 38.48, 37.15, 33.70, 28.27 (3C), 24.76, 15.43, 11.20. HRMS (ESI)  $m/z$  calcd for  $\text{C}_{15}\text{H}_{28}\text{N}_2\text{O}_3$   $[\text{M}+\text{H}]^+$ : 285.2100, found 284.5101

***tert*-butyl (*S*)-(1-(but-3-en-1-ylamino)-4-methyl-1-oxopentan-2-yl)carbamate (5c)**

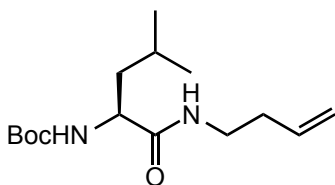

**5c:**  $\text{C}_{15}\text{H}_{28}\text{N}_2\text{O}_3$   
Exact mass: 284.2100

Following the general procedure for the synthesis of **3**, **5c** was synthesized from Boc-Leu-OH (1.3 g, 5.3 mmol) in the presence of a stock solution of HOBt (0.72 g, 5.3 mmol, 1.0 eq.), HBTU (3.0 g, 7.9 mmol, 1.5 eq.), DIEA (2.7 mL, 15.8 mmol, 3 eq.) and 3-butenylamine-HCl (0.85 g, 7.9 mmol, 1.5 eq) in DMF at 40°C. The crude product was purified by flash chromatography ( $\text{SiO}_2$ , 0% to 33% EtOAc in hexanes) to provide 1.18 g (79%) of **5c** as a white solid.  $^1\text{H}$  NMR (500 MHz,  $\text{CDCl}_3$ )  $\delta$  6.34 (bs, 1H), 5.74 (ddt,  $J = 17.1, 10.2, 6.8$  Hz, 1H), 5.12–5.02 (m, 2H), 5.00 (d,  $J = 8.5$  Hz, 1H), 4.06 (q,  $J = 7.6$  Hz, 1H), 3.38–3.20 (m, 2H), 2.24 (qt,  $J = 6.8, 1.4$  Hz, 2H), 1.66–1.60 (m, 2H), 1.45–1.40 (m, 1H), 1.42 (s, 9H), 0.96–0.86 (m, 6H);  $^{13}\text{C}$  NMR (126 MHz,  $\text{CDCl}_3$ )  $\delta$  172.83, 155.78, 135.10, 116.81, 79.55, 53.02, 41.51, 38.45, 33.66, 28.27 (3C), 24.65, 22.82, 22.00. HRMS (ESI)  $m/z$  calcd for  $\text{C}_{15}\text{H}_{28}\text{N}_2\text{O}_3$   $[\text{M}+\text{H}]^+$ : 285.2100, found 285.2102

***tert*-butyl (*S*)-(1-(but-3-en-1-ylamino)-1-oxo-3-phenylpropan-2-yl)carbamate (5d)**

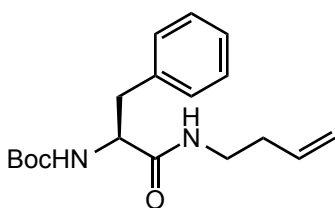

**5d:**  $\text{C}_{18}\text{H}_{26}\text{N}_2\text{O}_3$   
Exact mass: 318.1943

Following the general procedure for the synthesis of **3**, **5d** was synthesized from Boc-Phe-OH (1.4 g, 5.3 mmol) in the presence of a stock solution of HOBt (0.72 g, 5.3 mmol, 1.0 eq.), HBTU (3.0 g, 7.9 mmol, 1.5 eq.), DIEA (2.7 mL, 15.8 mmol, 3 eq.). A solution of 3-butenylamine-HCl (0.85 g, 7.9 mmol, 1.5 eq.) in DMF (2 mL) was added and the reaction heated to 50°C and stirred for 1 h. The crude product was purified by flash chromatography ( $\text{SiO}_2$ , 0% to 33% EtOAc in hexanes) to provide 1.53 g (91%) of **5d** as a white solid.  $^1\text{H}$  NMR (500 MHz,  $\text{CDCl}_3$ )  $\delta$  7.26–7.16 (m, 5H), 6.30 (bs, 1H), 5.63–5.57 (m, 1H), 5.38 (d,  $J = 7.9$  Hz, 1H), 5.00–4.90 (m, 2H), 4.41–4.26 (m, 1H), 3.26–3.22 (m, 1H), 3.20–3.13 (m, 1H), 3.04–2.95 (m, 2H), 2.13–2.04 (m, 2H), 1.37 (s, 9H);  $^{13}\text{C}$  NMR (126 MHz,  $\text{CDCl}_3$ )  $\delta$  171.54, 155.57, 137.05, 135.00 (2C), 129.32 (2C), 128.38, 126.64, 116.85, 79.67, 55.91, 39.02, 38.49, 33.48, 28.28 (3C). HRMS (ESI)  $m/z$  calcd for  $\text{C}_{18}\text{H}_{26}\text{N}_2\text{O}_3$   $[\text{M}+\text{H}]^+$ : 319.1943, found 319.1940

### ***tert*-butyl (2-(but-3-en-1-ylamino)-2-oxoethyl)carbamate (5e)**

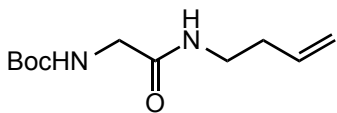

**5e:** C<sub>11</sub>H<sub>20</sub>N<sub>2</sub>O<sub>3</sub>  
Exact mass: 228.1474

Following the general procedure for the synthesis of **3**, **5e** was synthesized from Boc-Gly-OH (0.92 g, 5.3 mmol) in the presence of a stock solution of HOBt (0.72 g, 5.3 mmol, 1.0 eq.), HBTU (3.0 g, 7.9 mmol, 1.5 eq.), DIEA (2.7 mL, 15.8 mmol, 3 eq.). A solution of 3-butenylamine-HCl (0.85 g, 7.9 mmol, 1.5 eq) in DMF (2 mL) was added and the reaction heated to 50°C and stirred for 1 h. The crude product was purified by flash chromatography (SiO<sub>2</sub>, 3:1 EtOAc:hexane) to provide 0.84 g (70%) of **5e** as a white solid. <sup>1</sup>H NMR (300 MHz, CDCl<sub>3</sub>) δ 6.19 (bs, 1H), 5.75 (ddt, *J* = 17.1, 10.3, 6.8 Hz, 1H), 5.13–5.02 (m, 2H), 3.77 (s, 2H), 3.35 (q, *J* = 6.5 Hz, 2H), 2.27 (qt, *J* = 6.8, 1.4 Hz, 2H), 1.45 (s, 9H); <sup>13</sup>C NMR (126 MHz, CDCl<sub>3</sub>) δ 169.85, 156.20, 134.92, 117.10, 80.00, 44.22, 38.45, 33.52, 28.25 (3C). HRMS (ESI) *m/z* calcd for C<sub>11</sub>H<sub>20</sub>N<sub>2</sub>O<sub>3</sub> [M+H]<sup>+</sup>: 229.1474, found 229.1476

### ***tert*-butyl (S)-2-(but-3-en-1-ylcarbamoyl)pyrrolidine-1-carboxylate (5f)**

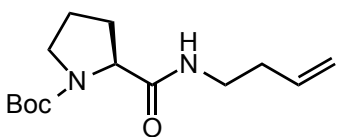

**5f:** C<sub>14</sub>H<sub>24</sub>N<sub>2</sub>O<sub>3</sub>  
Exact mass: 268.1787

Following the general procedure for the synthesis of **3**, **5f** was synthesized from Boc-Pro-OH (1.1 g, 5.3 mmol) in the presence of a stock solution of HOBt (0.72 g, 5.3 mmol, 1.0 eq.), HBTU (3.0 g, 7.9 mmol, 1.5 eq.), DIEA (2.7 mL, 15.8 mmol, 3 eq.). A solution of 3-butenylamine-HCl (0.85 g, 7.9 mmol, 1.5 eq.) in DMF (2 mL) was added and the reaction heated to 50°C and stirred for 1 h. The crude product was purified by flash chromatography (SiO<sub>2</sub>, 2:1 EtOAc:hexane) to provide 1.02 g (72%) of **5f** as a white solid (mixture of *cis* and *trans* proline isomers). <sup>1</sup>H NMR (500 MHz, CDCl<sub>3</sub>) δ 6.84 (bs, 1H), 6.14 (bs, 1H), 5.68–5.61 (m, 1H), 4.99–4.94 (m, 2H), 4.23–3.99 (m, 1H), 3.34–3.19 (m, 4H), 2.14–1.89 (m, 4H), 1.89–1.67 (m, 2H), 1.35 (s, 9H); <sup>13</sup>C NMR (126 MHz, CDCl<sub>3</sub>) δ 172.42, 171.87, 155.57, 154.57, 135.10, 116.88, 80.15, 61.18, 59.90, 46.94, 38.22, 33.66, 31.01, 28.28 (3C), 24.41, 23.56. HRMS (ESI) *m/z* calcd for C<sub>14</sub>H<sub>24</sub>N<sub>2</sub>O<sub>3</sub> [M+H]<sup>+</sup>: 269.1787, found 269.1782

### ***tert*-butyl (S)-(1-(but-3-en-1-ylamino)-3-(1*H*-indol-3-yl)-1-oxopropan-2-yl)carbamate (5g)**

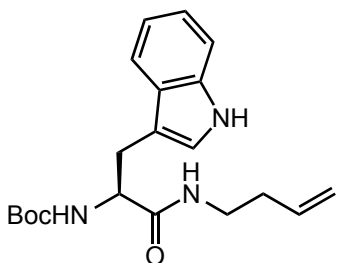

**5g:** C<sub>20</sub>H<sub>27</sub>N<sub>3</sub>O<sub>3</sub>  
Exact mass: 357.2052

Following the general procedure for the synthesis of **3**, **5g** was synthesized from Boc-Trp-OH (1.6 g, 5.3 mmol) in the presence of a stock solution of HOBt (0.72 g, 5.3 mmol, 1.0 eq.), HBTU (3.0 g, 7.9 mmol, 1.5 eq.), DIEA (2.7 mL, 15.8 mmol, 3 eq.) A solution of 3-butenylamine-HCl (0.85 g, 7.9 mmol, 1.5 eq.) in DMF (2 mL) was added and the reaction heated to 50°C and stirred for 1 h. The crude product was purified by flash chromatography (SiO<sub>2</sub>, 0% to 50% EtOAc in hexanes) to provide 1.40 g (74%) of **5g** as a

white solid.  $^1\text{H}$  NMR (500 MHz,  $\text{CDCl}_3$ )  $\delta$  8.24 (bs, 1H), 7.66 (d,  $J = 7.9$  Hz, 1H), 7.37 (dt,  $J = 8.2, 0.9$  Hz, 1H), 7.20 (ddd,  $J = 8.2, 7.0, 1.2$  Hz, 1H), 7.13 (ddd,  $J = 8.1, 7.1, 1.1$  Hz, 1H), 7.05 (d,  $J = 2.4$  Hz, 1H), 5.67 (bs, 1H), 5.58–5.41 (m, 1H), 5.19 (bs, 1H), 4.95–4.75 (m, 2H), 4.39 (q,  $J = 7.2$  Hz, 1H), 3.38–3.25 (m, 1H), 3.20–3.11 (m, 3H), 2.05–1.94 (m, 2H), 1.43 (s, 9H);  $^{13}\text{C}$  NMR (126 MHz,  $\text{CDCl}_3$ )  $\delta$  171.61, 155.48, 136.28, 134.81, 127.41, 123.17, 122.20, 119.65, 118.87, 117.08, 111.26, 110.63, 80.03, 55.34, 38.35, 33.25, 28.65, 28.32 (3C). HRMS (ESI)  $m/z$  calcd for  $\text{C}_{20}\text{H}_{27}\text{N}_3\text{O}_3$   $[\text{M}+\text{H}]^+$  : 358.2052, found 358.2058

***tert*-butyl (*S*)-(1-(but-3-en-1-ylamino)-1-oxo-3-(1-tosyl-1*H*-imidazol-4-yl)propan-2-yl)carbamate (**5h**)**

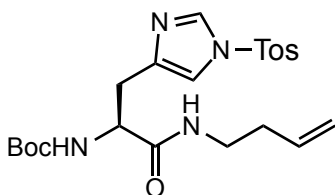

**5h:**  $\text{C}_{22}\text{H}_{30}\text{N}_4\text{O}_5\text{S}$   
Exact mass: 462.1937

Following the general procedure for the synthesis of **3**, **5h** was synthesized from Boc-His(Tos)-OH (2.1 g, 5.3 mmol) in the presence of a stock solution of HOBt (0.72 g, 5.3 mmol, 1.0 eq.), HBTU (3.0 g, 7.9 mmol, 1.5 eq.), DIEA (2.7 mL, 15.8 mmol, 3 eq.). A solution of 3-butenylamine-HCl (0.85 g, 7.9 mmol, 1.5 eq.) in DMF (2 mL) was added and the reaction heated to 50°C and stirred for 1 h. The crude product was purified by flash chromatography ( $\text{SiO}_2$ , 3:1 EtOAc:hexanes) to provide 1.73 g (71%) of **5h** as a white solid.  $^1\text{H}$  NMR (500 MHz,  $\text{CD}_3\text{OD}$ )  $\delta$  8.16 (bs, 1H), 7.94–7.86 (m, 2H), 7.46–7.38 (m, 2H), 7.30 (bs, 1H), 5.70 (ddt,  $J = 17.0, 10.2, 6.8$  Hz, 1H), 5.02–4.97 (m, 2H), 4.79 (bs, 1H), 4.28 (dd,  $J = 8.9, 5.3$  Hz, 1H), 3.20–3.06 (m, 2H), 2.95 (m, 1H), 2.78 (m, 1H), 2.40 (s, 3H), 2.12 (q,  $J = 6.9$  Hz, 2H), 1.34 (s, 9H);  $^{13}\text{C}$  NMR (126 MHz,  $\text{CD}_3\text{OD}$ )  $\delta$  172.32, 156.06, 146.73, 140.21, 136.73, 135.07, 134.64, 130.33 (2C), 127.29 (2C), 115.80, 115.09, 79.41, 54.14, 38.34, 33.14, 30.23, 27.24 (3C), 20.34. HRMS (ESI)  $m/z$  calcd for  $\text{C}_{22}\text{H}_{30}\text{N}_4\text{O}_5\text{S}$   $[\text{M}+\text{H}]^+$  : 462.1937, found 462.1937

***tert*-butyl (*S*)-(1-(but-3-en-1-ylamino)-3-(*tert*-butoxy)-1-oxopropan-2-yl)carbamate (**5i**)**

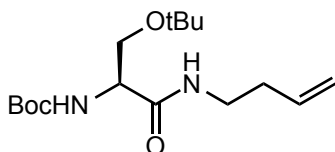

**5i:**  $\text{C}_{16}\text{H}_{30}\text{N}_2\text{O}_4$   
Exact mass: 314.2206

Following the general procedure for the synthesis of **3**, **5i** was synthesized from Boc-Ser(OtBu)-OH (1.4 g, 5.3 mmol) in the presence of a stock solution of HOBt (0.72 g, 5.3 mmol, 1.0 eq.), HBTU (3.0 g, 7.9 mmol, 1.5 eq.), DIEA (2.7 mL, 15.8 mmol, 3 eq.). A solution of 3-butenylamine-HCl (0.85 g, 7.9 mmol, 1.5 eq.) in DMF (2 mL) was added and the reaction heated to 50°C and stirred for 1 h. The crude product was purified by flash chromatography ( $\text{SiO}_2$ , 0% to 33% EtOAc in hexanes) to provide 1.46 g (88%) of **5i** as a white solid.  $^1\text{H}$  NMR (500 MHz,  $\text{CDCl}_3$ )  $\delta$  6.61 (s, 1H), 5.76–5.65 (m, 1H), 5.39 (bs, 1H), 5.07–4.99 (m, 2H), 4.1–3.99 (m, 1H), 3.74–3.66 (m, 1H), 3.36–3.24 (m, 3H), 2.24–2.15 (m, 2H), 1.39 (m, 9H), 1.12 (m, 9H);  $^{13}\text{C}$  NMR (126 MHz,  $\text{CDCl}_3$ )  $\delta$  170.47, 155.42, 135.06, 117.08,



79.74, 73.77, 61.82, 54.24, 38.42, 33.58, 28.25 (3C), 27.37 (3C). HRMS (ESI)  $m/z$  calcd for  $C_{16}H_{30}N_2O_4$   $[M+H]^+$ : 315.2206, found 315.2212

***tert*-butyl ((2*S*,3*R*)-1-(but-3-en-1-ylamino)-3-(*tert*-butoxy)-1-oxobutan-2-yl)carbamate (5j)**

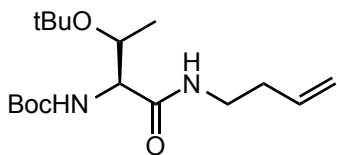

**5j:**  $C_{17}H_{32}N_2O_4$   
Exact mass: 328.2362

Following the general procedure for the synthesis of **3**, **5j** was synthesized from Boc-Thr(OtBu)-OH (1.4 g, 5.3 mmol) in the presence of a stock solution of HOBT (0.72 g, 5.3 mmol, 1.0 eq.), HBTU (3.0 g, 7.9 mmol, 1.5 eq.), DIEA (2.7 mL, 15.8 mmol, 3 eq.) A solution of 3-butenylamine-HCl (0.85 g, 7.9 mmol, 1.5 eq.) in DMF (2 mL) was added and the reaction heated to 50°C and stirred for 1 h. The crude product was purified by flash chromatography (SiO<sub>2</sub>, 0% to 25% EtOAc in hexanes) to provide 1.48 g (85%) of **5j** as a white solid. <sup>1</sup>H NMR (500 MHz, CDCl<sub>3</sub>)  $\delta$  6.87 (t,  $J$  = 5.4 Hz, 1H), 5.66 (ddt,  $J$  = 17.1, 10.2, 6.8 Hz, 1H), 5.55 (d,  $J$  = 5.6 Hz, 1H), 5.05–4.92 (m, 2H), 3.99 (qd,  $J$  = 6.4, 3.5 Hz, 1H), 3.93 (m, 1H), 3.29–3.19 (m, 2H), 2.15 (qt,  $J$  = 6.9, 1.2 Hz, 2H), 1.33 (s, 9H), 1.13 (s, 9H), 0.91 (d,  $J$  = 6.4 Hz, 3H); <sup>13</sup>C NMR (126 MHz, CDCl<sub>3</sub>)  $\delta$  169.46, 155.42, 135.02, 117.10, 79.23, 74.92, 66.80, 58.29, 38.35, 33.54, 28.24 (3C), 28.18 (3C), 17.27. HRMS (ESI)  $m/z$  calcd for  $C_{17}H_{32}N_2O_4$   $[M+H]^+$ : 329.2362, found 329.2366

***tert*-butyl (*S*)-1-(1-(but-3-en-1-ylamino)-3-(4-(*tert*-butoxy)phenyl)-1-oxopropan-2-yl)carbamate (5k)**

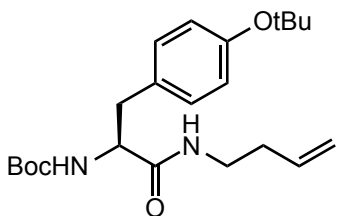

**5k:**  $C_{22}H_{34}N_2O_4$   
Exact mass: 390.2519

Following the general procedure for the synthesis of **3**, **5k** was synthesized from Boc-Tyr(OtBu)-OH (1.8 g, 5.3 mmol) in the presence of a stock solution of HOBT (0.72 g, 5.3 mmol, 1.0 eq.), HBTU (3.0 g, 7.9 mmol, 1.5 eq.), DIEA (2.7 mL, 15.8 mmol, 3 eq.). A solution of 3-butenylamine-HCl (0.85 g, 7.9 mmol, 1.5 eq.) in DMF (2 mL) was added and the reaction heated to 50°C and stirred for 1 h. The crude product was purified by flash chromatography (SiO<sub>2</sub>, 0% to 33% EtOAc in hexanes) to provide 1.73 g (84%) of **5k** as a white solid. <sup>1</sup>H NMR (500 MHz, CDCl<sub>3</sub>)  $\delta$  7.08 (d,  $J$  = 8.2 Hz, 2H), 6.91 (d,  $J$  = 8.4, 2H), 5.81 (bs, 1H), 5.63 (ddt,  $J$  = 17.1, 10.4, 6.9 Hz, 1H), 5.10 (bs, 1H), 5.04–4.89 (m, 2H), 4.23 (q,  $J$  = 7.5 Hz, 1H), 3.22 (q,  $J$  = 6.5 Hz, 2H), 3.03–2.93 (m, 2H), 2.15–2.09 (m, 2H), 1.40 (s, 9H), 1.32 (s, 9H); <sup>13</sup>C NMR (126 MHz, CDCl<sub>3</sub>)  $\delta$  171.31, 155.43, 154.15, 134.87, 131.68, 129.69 (2C), 124.15 (2C), 117.06, 79.83, 78.26, 56.00, 38.40, 38.16, 33.47, 28.77 (3C), 28.26 (3C). HRMS (ESI)  $m/z$  calcd for  $C_{22}H_{34}N_2O_4$   $[M+H]^+$ : 391.2519, found 391.2516

***tert*-butyl (*S*)-(1-(but-3-en-1-ylamino)-4-(methylthio)-1-oxobutan-2-yl)carbamate (**5l**)**

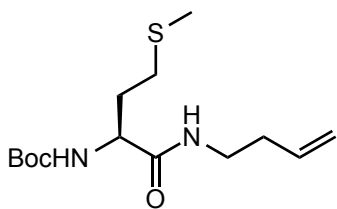

**5l:** C<sub>14</sub>H<sub>26</sub>N<sub>2</sub>O<sub>3</sub>S  
Exact mass: 302.1664

Following the general procedure for the synthesis of **3**, **5l** was synthesized from Boc-Met-OH (1.3 g, 5.3 mmol) in the presence of a stock solution of HOBt (0.72 g, 5.3 mmol, 1.0 eq.), HBTU (3.0 g, 7.9 mmol, 1.5 eq.), DIEA (2.7 mL, 15.8 mmol, 3 eq.). A solution of 3-butenylamine-HCl (0.85 g, 7.9 mmol, 1.5 eq) in DMF (2 mL) was added and the reaction heated to 50°C and stirred for 1 h. The crude product was purified by flash chromatography (SiO<sub>2</sub>, 0% to 33% EtOAc in hexanes) to provide 1.10 g (69%) of **5l** as a white solid. <sup>1</sup>H NMR (300 MHz, CDCl<sub>3</sub>) δ 6.60 (bs, 1H), 5.71 (ddt, *J* = 17.0, 10.2, 6.8 Hz, 1H), 5.52–5.35 (m, 1H), 5.11–4.95 (m, 2H), 4.29–4.11 (m, 1H), 3.40–3.13 (m, 2H), 2.59–2.38 (m, 2H), 2.21 (qt, *J* = 6.8, 1.3 Hz, 2H), 2.05 (s, 3H), 2.02–1.98 (m, 1H), 1.96–1.77 (m, 1H), 1.39 (s, 9H); <sup>13</sup>C NMR (126 MHz, CDCl<sub>3</sub>) δ 171.72, 155.70, 134.98, 117.01, 79.75, 53.46, 38.51, 33.63, 32.05, 30.10, 28.28 (3C), 15.17. HRMS (ESI) *m/z* calcd for C<sub>14</sub>H<sub>26</sub>N<sub>2</sub>O<sub>3</sub>S [M+H]<sup>+</sup>: 303.1664, found 303.1668

***tert*-butyl (*R*)-(1-(but-3-en-1-ylamino)-1-oxo-3-(tritylthio)propan-2-yl)carbamate (**5m**)**

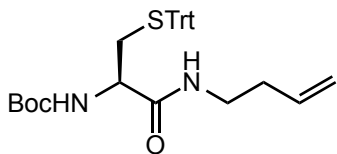

**5m:** C<sub>31</sub>H<sub>36</sub>N<sub>2</sub>O<sub>3</sub>S  
Exact mass: 516.2447

Following the general procedure for the synthesis of **3**, **5m** was synthesized from Boc-Cys(Trt)-OH (2.5 g, 5.3 mmol) in the presence of a stock solution of HOBt (0.72 g, 5.3 mmol, 1.0 eq.), HBTU (3.0 g, 7.9 mmol, 1.5 eq.), DIEA (2.7 mL, 15.8 mmol, 3 eq.). A solution of 3-butenylamine-HCl (0.85 g, 7.9 mmol, 1.5 eq.) in DMF (2 mL) was added and the reaction heated to 50°C and stirred for 1 h. The crude product was purified by flash chromatography (SiO<sub>2</sub>, 0% to 33% EtOAc in hexanes) to provide 2.04 g (75%) of **5m** as a white solid. <sup>1</sup>H NMR (500 MHz, CDCl<sub>3</sub>) δ 7.44–7.40 (m, 6H), 7.32–7.27 (m, 6H), 7.25–7.20 (m, 3H), 6.05 (bs, 1H), 5.71 (ddt, *J* = 17.0, 10.2, 6.8 Hz, 1H), 5.10–4.99 (m, 2H), 4.82 (bs, 1H), 3.87–3.84 (m, 1H), 3.32–3.19 (m, 2H), 2.75–2.71 (m, 1H), 2.54–2.50 (m, 1H), 2.21 (qt, *J* = 6.8, 1.3 Hz, 2H), 1.42 (s, 9H); <sup>13</sup>C NMR (126 MHz, CDCl<sub>3</sub>) δ 170.37, 155.35, 144.47 (3C), 135.01, 129.58 (6C), 128.03 (6C), 126.85 (3C), 117.23, 80.06, 67.13, 53.57, 38.51, 34.05, 33.58, 28.33 (3C). HRMS (ESI) *m/z* calcd for C<sub>31</sub>H<sub>36</sub>N<sub>2</sub>O<sub>3</sub>S [M+H]<sup>+</sup>: 517.2447, found 517.2450

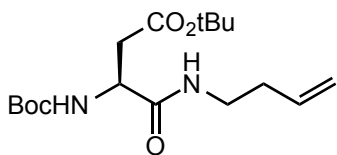

**5n:** C<sub>17</sub>H<sub>30</sub>N<sub>2</sub>O<sub>5</sub>  
Exact mass: 342.2155

***tert*-butyl (*S*)-4-(but-3-en-1-ylamino)-3-((*tert*-butoxycarbonyl)amino)-4-oxobutanoate (**5n**)**

Following the general procedure for the synthesis of **3**, **5n** was synthesized from Boc-Asp(OtBu)-OH (1.5 g, 5.3 mmol) in the presence of a stock solution of HOBt (0.72 g,

5.3 mmol, 1.0 eq.), HBTU (3.0 g, 7.9 mmol, 1.5 eq.), DIEA (2.7 mL, 15.8 mmol, 3 eq.). A solution of 3-butenylamine-HCl (0.85 g, 7.9 mmol, 1.5 eq) in DMF (2 mL) was added and the reaction heated to 50°C and stirred for 1 h. The crude product was purified by flash chromatography (SiO<sub>2</sub>, 0% to 50% EtOAc in hexanes) to provide 1.55 g (86%) of **5n** as a white solid. <sup>1</sup>H NMR (500 MHz, CDCl<sub>3</sub>) δ 6.58 (t, *J* = 5.7 Hz, 1H), 5.74–5.67 (m, 2H), 5.11–4.96 (m, 2H), 4.46–4.30 (m, 1H), 3.32–3.23 (m, 2H), 2.80 (dd, *J* = 16.8, 4.9 Hz, 1H), 2.56 (dd, *J* = 16.8, 6.6 Hz, 1H), 2.21 (qt, *J* = 6.7, 1.3 Hz, 2H), 1.41 (s, 9H), 1.40 (s, 9H); <sup>13</sup>C NMR (126 MHz, CDCl<sub>3</sub>) δ 171.17, 170.71, 155.45, 134.96, 117.15, 81.49, 80.11, 50.69, 38.50, 37.36, 33.55, 28.27 (3C), 27.99 (3C). HRMS (ESI) *m/z* calcd for C<sub>17</sub>H<sub>30</sub>N<sub>2</sub>O<sub>5</sub> [M+H]<sup>+</sup>: 343.2155, found 343.2151

***tert*-butyl (*S*)-5-(but-3-en-1-ylamino)-4-((*tert*-butoxycarbonyl)amino)-5-oxopentanoate (**5o**)**

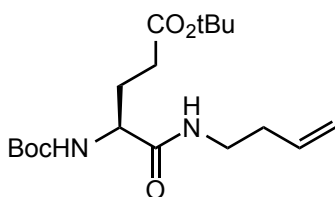

**5o**: C<sub>18</sub>H<sub>32</sub>N<sub>2</sub>O<sub>5</sub>  
Exact mass: 356.2311

Following the general procedure for the synthesis of **3**, **5o** was synthesized from Boc-Glu(OtBu)-OH (1.6 g, 5.3 mmol) in the presence of a stock solution of HOBt (0.72 g, 5.3 mmol, 1.0 eq.), HBTU (3.0 g, 7.9 mmol, 1.5 eq.), and DIEA (2.7 mL, 15.8 mmol, 3 eq.). A solution of 3-butenylamine-HCl (0.85 g, 7.9 mmol, 1.5 eq.) in DMF (2 mL) was added and the reaction heated to 50°C and stirred for 1 h. The crude product was purified by flash chromatography (SiO<sub>2</sub>, 0% to 40% EtOAc in hexanes) to provide 1.53 g (82%) of **5o** as a white solid. <sup>1</sup>H NMR (500 MHz, CDCl<sub>3</sub>) δ 6.93–6.81 (m, 1H), 5.69–5.57 (m, 2H), 4.99–4.87 (m, 2H), 4.07–4.03 (m, 1H), 3.26–3.21 (m, 1H), 3.14–3.10 (m, 1H), 2.29–2.07 (m, 4H), 1.99–1.87 (m, 1H), 1.84–1.71 (m, 1H), 1.31 (s, 18H). <sup>13</sup>C NMR (126 MHz, CDCl<sub>3</sub>) δ 172.32, 171.69, 155.62, 134.98, 116.79, 80.32, 79.48, 53.85, 38.47, 33.57, 31.66, 28.21 (3C), 27.93 (3C), 27.90. HRMS (ESI) *m/z* calcd for C<sub>17</sub>H<sub>30</sub>N<sub>2</sub>O<sub>5</sub> [M+H]<sup>+</sup>: 357.2311, found 357.2314

***tert*-butyl (*S*)-(1-(but-3-en-1-ylamino)-1,4-dioxo-4-(tritylamino)butan-2-yl)carbamate (**5p**)**

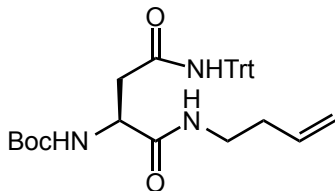

**5p**: C<sub>32</sub>H<sub>37</sub>N<sub>3</sub>O<sub>4</sub>  
Exact mass: 527.2784

Following the general procedure for the synthesis of **3**, **5p** was synthesized from Boc-Asn(Trt)-OH (2.5 g, 5.3 mmol) in the presence of a stock solution of HOBt (0.72 g, 5.3 mmol, 1.0 eq.), HBTU (3.0 g, 7.9 mmol, 1.5 eq.), DIEA (2.7 mL, 15.8 mmol, 3 eq.). A solution of 3-butenylamine-HCl (0.85 g, 7.9 mmol, 1.5 eq) in DMF (2 mL) was added and the reaction heated to 50°C and stirred for 1 h. The crude product was purified by flash chromatography (SiO<sub>2</sub>, 0% to 50% EtOAc in hexanes) to provide 2.17 g (78%) of **5p** as a white solid. <sup>1</sup>H NMR (500 MHz, CDCl<sub>3</sub>) δ 7.31–7.17 (m, 16H), 6.74 (bs, 1H), 6.29 (bs, 1H), 5.72 (ddt, *J* = 17.1, 10.3, 6.8 Hz, 1H), 5.12–4.99 (m, 2H), 4.43 (dd, *J* = 8.5, 4.6 Hz, 1H), 3.34–3.14 (m, 2H), 3.14–2.99 (m, 1H), 2.54 (dd, *J* = 15.0, 5.8 Hz, 1H), 2.21–

2.17 (m, 2H), 1.43 (s, 9H);  $^{13}\text{C}$  NMR (126 MHz,  $\text{CDCl}_3$ )  $\delta$  171.43, 170.49, 155.68, 144.44 (3C), 134.98, 128.73 (6C), 127.88 (6C), 126.93 (3C), 117.20, 79.94, 70.63, 51.76, 38.54, 38.18, 33.45, 28.40 (3C). HRMS (ESI)  $m/z$  calcd for  $\text{C}_{32}\text{H}_{37}\text{N}_3\text{O}_4$   $[\text{M}+\text{H}]^+$  : 528.2784, found 528.2782

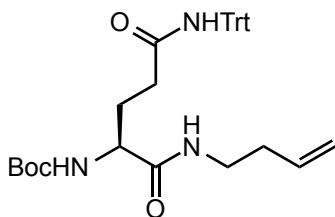

***tert*-butyl (*S*)-(1-(but-3-en-1-ylamino)-1,5-dioxo-5-(tritylamino)pentan-2-yl)carbamate (**5q**)**

**5q:**  $\text{C}_{33}\text{H}_{39}\text{N}_3\text{O}_4$   
Exact mass: 541.2941

Following the general procedure for the synthesis of **3**, **5q** was synthesized from Boc-Gln(Trt)-OH (2.5 g, 5.3 mmol) in the presence of a stock solution of HOBT (0.72 g, 5.3 mmol, 1.0 eq.), HBTU (3.0 g, 7.9 mmol, 1.5 eq.), DIEA (2.7 mL, 15.8 mmol, 3 eq.). A solution of 3-butenylamine-HCl (0.85 g, 7.9 mmol, 1.5 eq.) in DMF (2 mL) was added and

the reaction heated to  $50^\circ\text{C}$  and stirred for 1 h. The crude product was purified by flash chromatography ( $\text{SiO}_2$ , 0% to 50% EtOAc in hexanes) to provide 2.37 g (83%) of **5q** as a white solid.  $^1\text{H}$  NMR (300 MHz,  $\text{CDCl}_3$ )  $\delta$  7.37–7.12 (m, 17H), 6.41 (bs, 1H), 5.79–5.56 (m, 2H), 5.12–4.91 (m, 2H), 3.00–3.93 (m, 1H), 3.34–3.04 (m, 2H), 2.56–2.24 (m, 2H), 2.25–2.08 (m, 2H), 2.07–1.76 (m, 2H), 1.43 (s, 9H);  $^{13}\text{C}$  NMR (126 MHz,  $\text{CDCl}_3$ )  $\delta$  171.86, 171.47, 155.88, 144.59 (3C), 135.05, 128.69 (6C), 127.92 (6C), 126.95 (3C), 117.09, 79.74, 70.57, 53.62, 38.54, 33.73, 33.62, 29.87, 28.36 (3C). HRMS (ESI)  $m/z$  calcd for  $\text{C}_{33}\text{H}_{39}\text{N}_3\text{O}_4$   $[\text{M}+\text{H}]^+$  : 542.2941, found 542.2942

**di-*tert*-butyl (6-(but-3-en-1-ylamino)-6-oxohexane-1,5-diyl)(*S*)-dicarbamate (**5r**)**

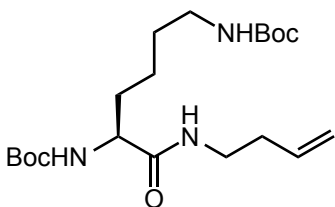

**5r:**  $\text{C}_{20}\text{H}_{37}\text{N}_3\text{O}_5$   
Exact mass: 399.2733

Following the general procedure for the synthesis of **3**, **5r** was synthesized from Boc-Lys(Boc)-OH (1.8 g, 5.3 mmol) in the presence of a stock solution of HOBT (0.72 g, 5.3 mmol, 1.0 eq.), HBTU (3.0 g, 7.9 mmol, 1.5 eq.), DIEA (2.7 mL, 15.8 mmol, 3 eq.). A solution of 3-butenylamine-HCl (0.85 g, 7.9 mmol, 1.5 eq.) in DMF (2 mL) was added and the reaction heated to  $50^\circ\text{C}$  and stirred for 1 h. The crude product was purified by flash chromatography ( $\text{SiO}_2$ , 0% to 50% EtOAc in hexanes) to provide 1.90 g (90%) of **5r** as a white solid.  $^1\text{H}$  NMR (500 MHz,  $\text{CDCl}_3$ )  $\delta$  6.60 (bs, 1H), 5.69 (ddt,  $J = 17.1, 10.2, 6.8$  Hz, 1H), 5.43–5.29 (m, 1H), 5.07–4.96 (m, 2H), 4.83–4.70 (m, 1H), 4.02 (m, 1H), 3.35–3.25 (m, 1H), 3.21 (m, 1H), 3.11–2.98 (m, 2H), 2.20 (qt,  $J = 6.8, 1.3$  Hz, 2H), 1.79–1.69 (m, 1H), 1.62–1.51 (m, 1H), 1.49–1.41 (m, 2H), 1.41–1.34 (bs, 18H), 1.35–1.26 (m, 2H);  $^{13}\text{C}$  NMR (126 MHz,  $\text{CDCl}_3$ )  $\delta$  172.14, 156.13, 155.76, 135.05, 117.03, 79.75, 78.96, 54.36, 39.92, 38.44, 33.63, 32.15, 29.59, 28.39 (3C), 28.30 (3C), 22.60. HRMS (ESI)  $m/z$  calcd for  $\text{C}_{20}\text{H}_{37}\text{N}_3\text{O}_5$   $[\text{M}+\text{H}]^+$  : 400.2733, found 400.2730

***tert*-butyl (*S*)-(*1*-(*but*-3-en-1-ylamino)-1-oxo-5-(3-((2,2,4,6,7-pentamethyl-2,3-dihydrobenzofuran-5-yl)sulfonyl)guanidino)pentan-2-yl)carbamate (**5s**)**

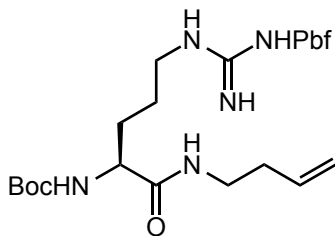

**5s:** C<sub>28</sub>H<sub>45</sub>N<sub>5</sub>O<sub>6</sub>S

Exact mass: 579.3091

Following the general procedure for the synthesis of **3**, **5s** was synthesized from Boc-Arg(Pbf)-OH (2.8 g, 5.3 mmol) in the presence of a stock solution of HOBt (0.72 g, 5.3 mmol, 1.0 eq.), HBTU (3.0 g, 7.9 mmol, 1.5 eq.), DIEA (2.7 mL, 15.8 mmol, 3 eq.). A solution of 3-butenylamine-HCl (0.85 g, 7.9 mmol, 1.5 eq) in DMF (2 mL) was added and the reaction heated to 50°C and stirred for 1 h. The crude product was purified by flash chromatography (SiO<sub>2</sub>, EtOAc) to provide 2.14 g (70%) of **5s** as a white solid. <sup>1</sup>H NMR (500 MHz, CDCl<sub>3</sub>) δ 7.03 (bs, 1H), 6.36 (bs, 2H), 5.79–5.60 (m, 2H), 5.09–4.96 (m, 2H), 4.13 (m, 1H), 3.36–3.17 (m, 4H), 2.96 (s, 2H), 2.58 (s, 3H), 2.51 (s, 3H), 2.23 (q, *J* = 6.9 Hz, 2H), 2.10 (s, 3H), 1.80–1.78 (m, 1H), 1.69–1.53 (m, 4H), 1.47 (s, 6H), 1.40 (s, 9H); <sup>13</sup>C NMR (126 MHz, CDCl<sub>3</sub>) δ 172.36, 158.82, 156.44, 156.00, 138.31, 135.13, 132.71, 132.24, 124.65, 117.55, 116.85, 86.40, 79.92, 64.33, 53.99, 43.25, 40.55, 38.71, 33.56, 30.43, 28.57 (2C), 28.33 (3C), 25.56, 19.26, 17.92, 12.43. HRMS (ESI) *m/z* calcd for C<sub>28</sub>H<sub>45</sub>N<sub>5</sub>O<sub>6</sub>S [M+H]<sup>+</sup>: 580.3091, found 580.3096

**General Procedure for Homodimerization of Amino Acids**

***di-tert*-butyl ((*2S,2'S*)-(hex-3-ene-1,6-diylbis(azanediyl))bis(1-oxopropane-1,2-diyl))dicarbamate (**4**)**

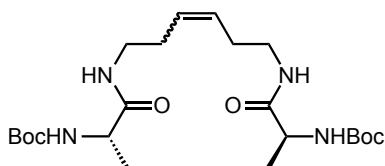

**4:** C<sub>22</sub>H<sub>40</sub>N<sub>4</sub>O<sub>6</sub>

Exact mass: 456.2948

The homoallyl-modified alanine **3** (0.20 g, 0.83 mmol) was dissolved in THF (1.4 mL) under a gentle stream of argon. A solution of catalyst **1** or **2** (619 μL of a 0.10 M solution in THF) was added and the reaction heated to 40°C and stirred for 4 h. The solution was allowed to cool to room temperature upon which an excess of ethyl vinyl ether (1.0 mL, 10.4 mmol, 12 eq.) was added to quench the reaction. The solvent was removed *in vacuo* and the residue purified by column chromatography (SiO<sub>2</sub>; 0% to 25% EtOAc in hexane) to afford 0.28 g (74%) of product **4** as a white solid. <sup>1</sup>H NMR (500 MHz, CDCl<sub>3</sub>) δ 7.16 (bs, 2H), 5.49–5.34 (m, 2H), 5.24 (d, *J* = 8.4 Hz, 2H), 4.31–4.14 (m, 2H), 3.73–3.60 (m, 2H), 3.03–2.86 (m, 2H), 2.26–2.16 (m, 4H), 1.43 (s, 18H), 1.39–1.27 (m, 6H); <sup>13</sup>C NMR (126 MHz, CDCl<sub>3</sub>) δ 173.34 (2C), 155.73 (2C), 129.23 (2C), 79.91 (2C), 50.08 (2C), 38.65 (2C), 28.35 (3C), 28.32 (3C), 27.97 (2C), 18.53 (2C). HRMS (ESI) *m/z* calcd for C<sub>22</sub>H<sub>40</sub>N<sub>4</sub>O<sub>6</sub> [M+H]<sup>+</sup>: 457.2948, found 457.2945

**di-tert-butyl ((2*S*,2'*S*)-(hex-3-ene-1,6-diylbis(azanediyl))bis(3-methyl-1-oxobutane-1,2-diyl))dicarbamate (6a)**

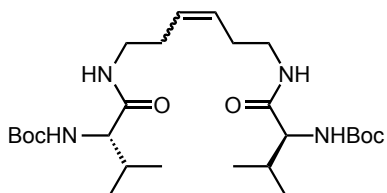

**6a:** C<sub>26</sub>H<sub>48</sub>N<sub>4</sub>O<sub>6</sub>  
Exact mass: 512.3574

Following the procedure for **4**, the homodimerization product **6a** was obtained when homoallyl-modified valine **5a** (0.22 g, 0.81 mmol) was reacted with catalyst **1** or **2** (610  $\mu$ l of a 0.10 M solution in THF) in THF (1.4 mL) under argon for 4 h and quenched with excess ethyl vinyl ether. The residue was purified by column chromatography (SiO<sub>2</sub>; 0% to 50% EtOAc in hexane) to afford 0.30 g (71%) of the product **6a** as a white solid. <sup>1</sup>H NMR (500 MHz, CDCl<sub>3</sub>)  $\delta$  7.43–7.36 (m, 2H), 5.42–5.34 (m, 2H), 5.17 (d, *J* = 9.6 Hz, 2H), 3.95 (dd, *J* = 9.7, 7.7 Hz, 2H), 3.93–3.83 (m, 2H), 2.80–2.76 (m, 2H), 2.25–2.21 (m, 2H), 2.18–2.12 (m, 2H), 1.94–1.90 (m, 2H), 1.67 (bs, 2H), 1.43 (s, 18H), 0.96 (d, *J* = 6.7 Hz, 6H), 0.95 (d, *J* = 6.6 Hz, 6H); <sup>13</sup>C NMR (126 MHz, CDCl<sub>3</sub>)  $\delta$  172.31 (2C), 156.28 (2C), 129.56 (2C), 79.70 (2C), 60.43 (2C), 38.07 (2C), 30.92 (2C), 28.32 (6C), 19.21 (2C), 18.59 (2C). HRMS (ESI) *m/z* calcd for C<sub>26</sub>H<sub>48</sub>N<sub>4</sub>O<sub>6</sub> [M+H]<sup>+</sup>: 513.3574, found 513.3570

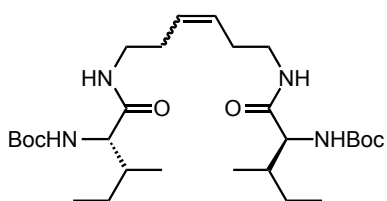

**6b:** C<sub>28</sub>H<sub>52</sub>N<sub>4</sub>O<sub>6</sub>  
Exact mass: 540.3887

**di-tert-butyl ((2*S*,2'*S*,3*R*,3'*R*)-(hex-3-ene-1,6-diylbis(azanediyl))bis(3-methyl-1-oxopentane-1,2-diyl))dicarbamate (6b)**

Following the procedure for **4**, the homodimerization product **6b** was obtained when homoallyl-modified isoleucine **5b** (0.21 g, 0.74 mmol) was reacted with catalyst **1** or **2** (553  $\mu$ l of a 0.10 M solution in THF) in THF (1.3 mL) under argon. The residue was purified by column chromatography (SiO<sub>2</sub>; 0% to 50% EtOAc in hexane) to afford 0.27 g (68%) of the product **6b** as a white solid. <sup>1</sup>H NMR (500 MHz, CDCl<sub>3</sub>)  $\delta$  7.52–7.45 (m, 2H), 5.42–5.33 (m, 2H), 5.14 (d, *J* = 9.7 Hz, 2H), 4.02–3.93 (m, 4H), 2.81–2.70 (m, 2H), 2.27–2.18 (m, 2H), 2.18–2.08 (m, 2H), 1.76–1.63 (m, 2H), 1.58 (m, 2H), 1.42 (s, 18H), 1.21–1.09 (m, 2H), 0.94–0.82 (m, 12H); <sup>13</sup>C NMR (126 MHz, CDCl<sub>3</sub>)  $\delta$  172.46 (2C), 156.14 (2C), 129.59 (2C), 79.64 (2C), 59.02 (2C), 37.95 (2C), 36.86 (2C), 29.69 (2C), 28.33 (6C), 24.90 (2C), 15.31 (2C), 10.60 (2C). HRMS (ESI) *m/z* calcd for C<sub>28</sub>H<sub>52</sub>N<sub>4</sub>O<sub>6</sub> [M+H]<sup>+</sup>: 541.3887, found 541.3880

**di-tert-butyl ((2*S*,2'*S*)-(hex-3-ene-1,6-diylbis(azanediyl))bis(4-methyl-1-oxopentane-1,2-diyl))dicarbamate (6c)**

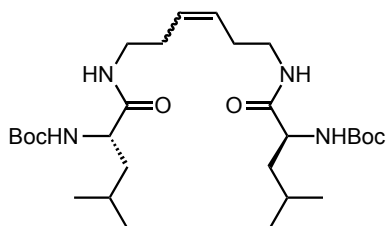

**6c:** C<sub>28</sub>H<sub>52</sub>N<sub>4</sub>O<sub>6</sub>  
Exact mass: 540.3887

Following the procedure for **4**, the homodimerization product **6c** was obtained when homoallyl-modified leucine **5c** (0.18 g, 0.63 mmol) was reacted with catalyst **1** or **2** (475  $\mu$ l of a 0.10 M solution in THF) in THF (1.1 mL) under argon. The residue was purified

by column chromatography (SiO<sub>2</sub>; 0% to 50% EtOAc in hexane) to afford 0.24 g (70%) of the product **6c** as a white solid. <sup>1</sup>H NMR (500 MHz, CDCl<sub>3</sub>) δ 7.64–7.55 (m, 2H), 5.40–5.38 (m, 2H), 5.06 (d, *J* = 9.1 Hz, 2H), 4.28–4.23 (m, 2H), 3.92–3.90 (m, 2H), 2.77–2.73 (m, 2H), 2.23 (m, 2H), 2.20–2.11 (m, 2H), 1.70–1.64 (m, 4H), 1.56–1.47 (m, 4H), 1.42 (s, 18H), 0.92 (d, *J* = 6.6 Hz, 6H), 0.88 (d, *J* = 6.6 Hz, 6H); <sup>13</sup>C NMR (126 MHz, CDCl<sub>3</sub>) δ 173.36 (2C), 155.95 (2C), 129.57 (2C), 79.75 (2C), 53.17 (2C), 41.68 (2C), 38.30 (2C), 28.33 (6C), 24.67 (4C), 23.04 (2C), 21.82 (2C). HRMS (ESI) *m/z* calcd for C<sub>28</sub>H<sub>52</sub>N<sub>4</sub>O<sub>6</sub> [M+H]<sup>+</sup>: 541.3887, found 541.3879

**di-tert-butyl ((2*S*,2'*S*)-(hex-3-ene-1,6-diylbis(azanediy))bis(1-oxo-3-phenylpropane-1,2-diyl))dicarbamate (6d)**

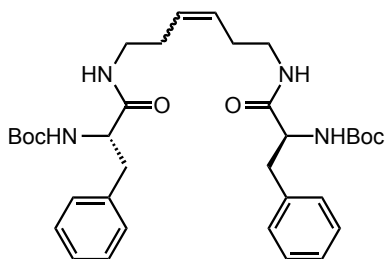

**6d:** C<sub>34</sub>H<sub>48</sub>N<sub>4</sub>O<sub>6</sub>  
Exact mass: 608.3574

Following the procedure for **4**, the homodimerization product **6d** was obtained when homoallyl-modified phenylalanine **5d** (0.23 g, 0.72 mmol) was reacted with catalyst **1** or **2** (542 μl of a 0.10 M solution in THF) in THF (1.2 mL) under argon. The residue was purified by column chromatography (SiO<sub>2</sub>; 0% to 50% EtOAc in hexane) to afford 0.32 g (73%) of the product **6d** as a white solid. <sup>1</sup>H NMR (300 MHz, CDCl<sub>3</sub>) δ 7.32–7.09 (m, 10H), 7.10–6.91 (m, 2H), 5.36–5.33 (m, 4H), 5.29 (bs, 2H), 4.50–4.30 (m, 2H), 3.62 (m, 2H), 3.12–2.72 (m, 4H), 2.15–2.04 (m, 4H), 1.35 (s, 18H); <sup>13</sup>C NMR (126 MHz, CDCl<sub>3</sub>) δ 171.98 (2C), 155.80 (2C), 137.01 (2C), 129.21 (4C), 128.46 (4C), 126.63 (2C), 79.94 (2C), 56.03 (2C), 38.92 (2C), 38.61 (2C), 28.28 (6C), 27.91 (2C). HRMS (ESI) *m/z* calcd for C<sub>34</sub>H<sub>48</sub>N<sub>4</sub>O<sub>6</sub> [M+H]<sup>+</sup>: 609.3574, found 609.3578

**di-tert-butyl ((2*S*,2'*S*)-(hex-3-ene-1,6-diylbis(azanediy))bis(3-(1*H*-indol-3-yl)-1-oxopropane-1,2-diyl))dicarbamate (6g)**

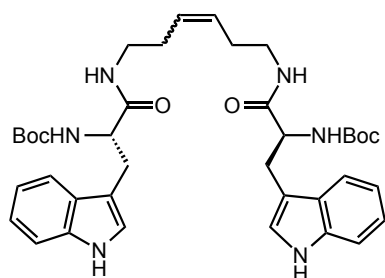

**6g:** C<sub>38</sub>H<sub>50</sub>N<sub>6</sub>O<sub>6</sub>  
Exact mass: 686.3792

Following the procedure for **4**, the homodimerization product **6g** was obtained when homoallyl-modified tryptophan **5g** (0.21 g, 0.59 mmol) was reacted with catalyst **1** or **2** (440 μl of a 0.10 M solution in THF) in THF (1.0 mL) under argon. The residue was purified by column chromatography (SiO<sub>2</sub>; 3:1 EtOAc:hexanes) to afford 0.26 g (66%) of the product **6g** as a white solid. <sup>1</sup>H NMR (500 MHz, CDCl<sub>3</sub>) δ 8.74 (bs, 2H), 7.59 (d, *J* = 7.9 Hz, 2H), 7.34 (d, *J* = 8.1 Hz, 2H), 7.16 (ddd, *J* = 8.1, 6.9, 1.1 Hz, 2H), 7.06 (t, *J* = 7.5 Hz, 2H), 6.94 (bs, 2H), 6.37 (bs, 2H), 5.38 (d, *J* = 8.1 Hz, 2H), 5.14–5.12 (m, 2H), 4.56–4.35 (m, 2H), 3.30–3.11 (m, 6H), 2.98–2.96 (m, 2H), 1.91–1.71 (m, 4H), 1.42 (s, 18H); <sup>13</sup>C NMR (126 MHz, CDCl<sub>3</sub>) δ 172.14 (2C), 155.71 (2C), 136.28 (2C), 128.53 (2C), 127.43 (2C), 123.38 (2C), 121.97 (2C), 119.47 (2C), 118.74 (2C), 111.34 (2C), 110.39 (2C), 80.08

(2C), 55.39 (2C), 38.77 (2C), 29.71 (2C), 28.34 (6C), 27.30 (2C). HRMS (ESI)  $m/z$  calcd for  $C_{38}H_{50}N_6O_6$   $[M+H]^+$  : 687.3792, found 687.3795

**di-*tert*-butyl ((5*S*,16*S*)-2,2,19,19-tetramethyl-6,15-dioxo-3,18-dioxa-7,14-diazaicos-10-ene-5,16-diyl)dicarbamate (6i)**

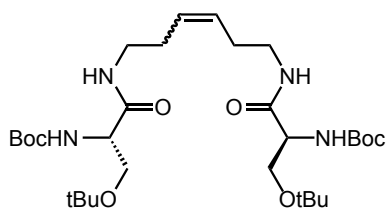

**6i:**  $C_{30}H_{56}N_4O_8$   
Exact mass: 600.4098

Following the procedure for **4**, the homodimerization product **6i** was obtained when homoallyl-modified serine **5i** (0.20 g, 0.63 mmol) was reacted with catalyst **1** or **2** (477  $\mu$ l of a 0.10 M solution in THF) in THF (1.1 mL) under argon. The residue was purified by column chromatography ( $SiO_2$ ; 0% to 50% EtOAc in hexane) to afford 0.27 g (72%) of the product **6i** as a white solid.  $^1H$  NMR (500 MHz,  $CDCl_3$ )  $\delta$  6.70 (s, 2H), 5.48–5.43 (m, 4H), 4.12 (bs, 2H), 3.76–3.74 (m, 2H), 3.36–3.33 (m, 4H), 3.27–3.24 (m, 2H), 2.32–2.20 (m, 4H), 1.45 (s, 18H), 1.17 (s, 18H);  $^{13}C$  NMR (126 MHz,  $CDCl_3$ )  $\delta$  170.66 (2C), 155.56 (2C), 128.55 (2C), 79.90 (2C), 73.86 (2C), 61.88 (2C), 54.34 (2C), 39.09 (2C), 28.32 (6C), 27.48 (2C), 27.44 (6C). HRMS (ESI)  $m/z$  calcd for  $C_{30}H_{56}N_4O_8$   $[M+H]^+$  : 601.4098, found 601.4100

**di-*tert*-butyl ((4*R*,5*S*,16*R*,17*S*)-2,2,4,17,19,19-hexamethyl-6,15-dioxo-3,18-dioxa-7,14-diazaicos-10-ene-5,16-diyl)dicarbamate (6j)**

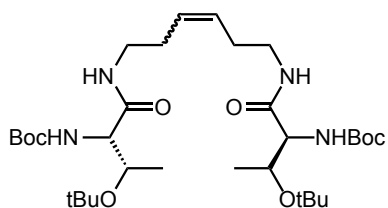

**6j:**  $C_{32}H_{60}N_4O_8$   
Exact mass: 628.4411

Following the procedure for **4**, the homodimerization product **6j** was obtained when homoallyl-modified threonine **5j** (0.19 g, 0.58 mmol) was reacted with catalyst **1** or **2** (433  $\mu$ l of a 0.10 M solution in THF) in THF (1.0 mL) under argon. The residue was purified by column chromatography ( $SiO_2$ ; 0% to 40% EtOAc in hexane) to afford 0.26 g (73%) of the product **6j** as a white solid.  $^1H$  NMR (500 MHz,  $CDCl_3$ )  $\delta$  6.99 (t,  $J$  = 5.4 Hz, 2H), 5.65 (d,  $J$  = 5.8 Hz, 2H), 5.50 (td,  $J$  = 4.4, 2.1 Hz, 2H), 4.11 (qd,  $J$  = 6.3, 3.3 Hz, 2H), 4.08–4.00 (m, 2H), 3.40–3.23 (m, 4H), 2.31–2.25 (m, 4H), 1.45 (s, 18H), 1.25 (s, 18H), 1.03 (d,  $J$  = 6.3 Hz, 6H);  $^{13}C$  NMR (126 MHz,  $CDCl_3$ )  $\delta$  169.73 (2C), 155.61 (2C), 128.63 (2C), 79.53 (2C), 75.13 (2C), 66.92 (2C), 58.39 (2C), 39.05 (2C), 28.37 (6C), 28.31 (6C), 27.55 (2C), 17.41 (2C). HRMS (ESI)  $m/z$  calcd for  $C_{32}H_{60}N_4O_8$   $[M+H]^+$  : 629.4411, found 629.4413

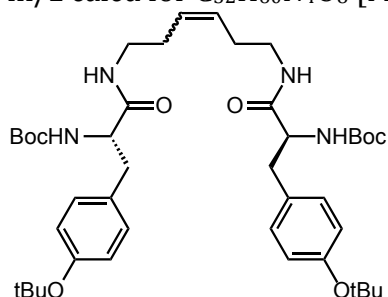

**6k:**  $C_{42}H_{64}N_4O_8$   
Exact mass: 752.4724

**di-*tert*-butyl ((2*S*,2'*S*)-(hex-3-ene-1,6-diylbis(azanediyl))bis(3-(4-(*tert*-butoxy)phenyl)-1-oxopropane-1,2-diyl)dicarbamate (6k)**

Following the procedure for **4**, the homodimerization product **6k** was obtained when homoallyl-modified tyrosine **5k** (0.17 g, 0.44 mmol) was reacted with



catalyst **1** or **2** (326  $\mu$ l of a 0.10 M solution in THF) in THF (0.76 mL) under argon. The residue was purified by column chromatography (SiO<sub>2</sub>; 0% to 50% EtOAc in hexane) to afford 0.21 g (64%) of the product **6k** as a white solid. <sup>1</sup>H NMR (300 MHz, CDCl<sub>3</sub>)  $\delta$  7.11–7.03 (m, 4H), 6.91–6.85 (m, 4H), 5.34 (dt, *J* = 6, 4, 4.8 Hz, 2H), 5.23 (d, *J* = 8.8 Hz, 2H), 4.42–4.35 (m, 2H), 3.59–3.51 (m, 2H), 2.97–2.83 (m, 6H), 2.17–2.05 (m, 6H), 1.36 (s, 18H), 1.31 (s, 18H); <sup>13</sup>C NMR (126 MHz, CDCl<sub>3</sub>)  $\delta$  171.84 (2C), 155.70 (2C), 154.04 (2C), 131.82 (2C), 129.67 (4C), 129.02 (2C), 124.23 (4C), 79.90 (2C), 78.32 (2C), 55.98 (2C), 38.61 (2C), 38.21 (2C), 28.82 (6C), 28.28 (6C), 27.80 (2C). HRMS (ESI) *m/z* calcd for C<sub>42</sub>H<sub>64</sub>N<sub>4</sub>O<sub>8</sub> [M+H]<sup>+</sup> : 753.4724, found 753.4719

**di-tert-butyl ((4*R*,15*R*)-5,14-dioxo-1,1,1,18,18,18-hexaphenyl-2,17-dithia-6,13-diazaoctadec-9-ene-4,15-diyl)dicarbamate (**6m**)**

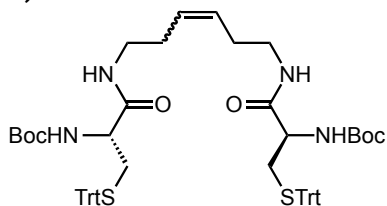

**6m**: C<sub>60</sub>H<sub>68</sub>N<sub>4</sub>O<sub>6</sub>S<sub>2</sub>  
Exact mass: 1004.4580

Following the procedure for **4**, the homodimerization product **6m** was obtained when homoallyl-modified cysteine **5m** (0.23 g, 0.44 mmol) was reacted with catalyst **1** or **2** (334  $\mu$ l of a 0.10 M solution in THF) in THF (0.78 mL) under Ar(g). The residue was purified by column chromatography (SiO<sub>2</sub>; 0% to 40% EtOAc in hexane) to afford 0.25 g (55%) of the product **6m**

as a white solid. <sup>1</sup>H NMR (500 MHz, CDCl<sub>3</sub>)  $\delta$  7.41 (m, 12H), 7.31–7.24 (m, 12H), 7.23–7.17 (m, 6H), 6.72 (bs, 1H), 6.11 (bs, 1H), 5.38–5.34 (m, 2H), 5.00–4.86 (m, 2H), 4.06–4.02 (m, 1H), 3.86 (bs, 1H), 3.51–3.48 (m, 1H), 3.19–3.16 (m, 1H), 2.98–2.92 (m, 1H), 2.67 (bs, 1H), 2.53 (m, 4H), 2.23–2.10 (m, 4H), 1.42–1.37 (m, 18H); <sup>13</sup>C NMR (126 MHz, CDCl<sub>3</sub>)  $\delta$  170.67 (2C), 155.52 (2C), 146.86 (2C), 144.46 (3C), 144.43 (3C), 129.57 (2C), 129.56 (6C), 128.92 (2C), 128.02 (2C), 128.00 (6C), 127.95 (2C), 127.91 (2C), 127.23 (2C), 126.84 (2C), 126.77 (2C), 80.14 (2C), 66.95 (2C), 53.58 (2C), 38.82 (2C), 33.98 (2C), 29.69 (2C), 28.32 (3C), 28.29 (3C), 27.66 (2C). HRMS (ESI) *m/z* calcd for C<sub>60</sub>H<sub>68</sub>N<sub>4</sub>O<sub>6</sub>S<sub>2</sub> [M+H]<sup>+</sup> : 1006.35, found 1006.44

**tert-butyl (6*S*,17*S*)-6-(2-(tert-butoxy)-2-oxoethyl)-17-((tert-butoxycarbonyl)amino)-2,2-dimethyl-4,7,16-trioxo-3-oxa-5,8,15-triazanonadec-11-en-19-oate (**6n**)**

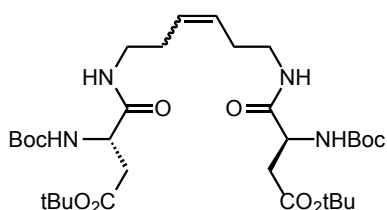

**6n**: C<sub>32</sub>H<sub>56</sub>N<sub>4</sub>O<sub>10</sub>  
Exact mass: 656.3996

Following the procedure for **4**, the homodimerization product **6n** was obtained when homoallyl-modified aspartate **5n** (0.19 g, 0.55 mmol) was reacted with catalyst **1** or **2** (416  $\mu$ l of a 0.10 M solution in THF) in THF (1.0 mL) under Ar(g). The residue was purified by column chromatography (SiO<sub>2</sub>; 0% to 50% EtOAc in hexane) to afford 0.22 g (61%) of the product **6n** as a white solid. <sup>1</sup>H NMR (500 MHz, CDCl<sub>3</sub>)  $\delta$  6.74 (bs, 2H), 5.76 (bs, 2H), 5.48–5.38 (m, 2H), 4.47–4.42 (m, 2H), 3.41–3.35 (m, 2H), 3.31–3.29 (m, 2H), 3.23–3.18 (m, 2H), 2.84–2.80 (m, 2H),

2.67–2.57 (m, 2H), 2.26–2.24 (m, 4H), 1.45 (s, 18H), 1.44 (s, 18H);  $^{13}\text{C}$  NMR (126 MHz,  $\text{CDCl}_3$ )  $\delta$  170.96 (2C), 155.54 (2C), 128.59 (2C), 81.51 (2C), 80.17 (2C), 50.82 (2C), 39.12 (2C), 37.48 (2C), 29.69 (2C), 28.33 (6C), 28.03 (6C), 27.41 (2C). HRMS (ESI)  $m/z$  calcd for  $\text{C}_{32}\text{H}_{56}\text{N}_4\text{O}_{10}$   $[\text{M}+\text{H}]^+$  : 657.8180, found 657.8177

***tert*-butyl (6*S*,17*S*)-6-(3-(*tert*-butoxy)-3-oxopropyl)-17-((*tert*-butoxycarbonyl)amino)-2,2-dimethyl-4,7,16-trioxo-3-oxa-5,8,15-triazaicos-11-en-20-oate (6o)**

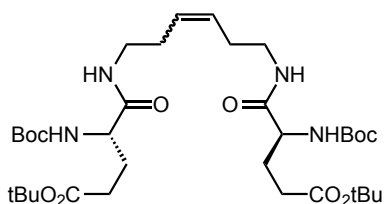

**6o:**  $\text{C}_{34}\text{H}_{60}\text{N}_4\text{O}_{10}$   
Exact mass: 684.4309

Following the procedure for **4**, the homodimerization product **6o** was obtained when homoallyl-modified glutamate **5o** (0.17 g, 0.48 mmol) was reacted with catalyst **1** or **2** (357  $\mu\text{l}$  of a 0.10 M solution in THF) in THF (0.83 mL) under Ar(g). The residue was purified by column chromatography ( $\text{SiO}_2$ ; 0% to 50% EtOAc in hexane) to afford 0.24 g (74%) of the product **6o** as a white solid.  $^1\text{H}$  NMR (500 MHz,  $\text{CDCl}_3$ )  $\delta$  7.19 (bs, 2H), 5.46 (d,  $J = 8.3$  Hz, 2H), 5.42–5.36 (m, 2H), 4.18–4.14 (m, 2H), 3.70–3.64 (m, 2H), 2.91–2.90 (m, 2H), 2.32–2.29 (m, 4H), 2.25–2.13 (m, 4H), 2.01–1.96 (m, 2H), 1.93–1.83 (m, 2H), 1.41 (s, 36H).  $^{13}\text{C}$  NMR (126 MHz,  $\text{CDCl}_3$ )  $\delta$  172.31 (2C), 172.01 (2C), 155.91 (2C), 129.04 (2C), 80.47 (2C), 79.85 (2C), 54.15 (2C), 38.70 (2C), 31.94 (2C), 28.31 (6C), 28.04 (6C), 27.98 (2C), 27.84 (2C). HRMS (ESI)  $m/z$  calcd for  $\text{C}_{32}\text{H}_{56}\text{N}_4\text{O}_{10}$   $[\text{M}+\text{H}]^+$  : 685.4309, found 685.4312

***di-tert*-butyl ((5*S*,16*S*)-3,6,15,18-tetraoxo-1,1,1,20,20,20-hexaphenyl-2,7,14,19-tetraazaicos-10-ene-5,16-diyl)dicarbamate (6p)**

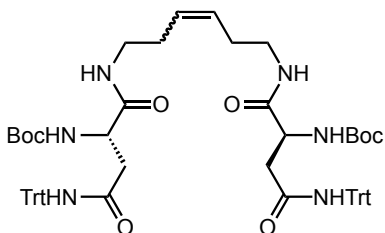

**6p:**  $\text{C}_{62}\text{H}_{70}\text{N}_6\text{O}_8$   
Exact mass: 1026.5255

Following the procedure for **4**, the homodimerization product **6p** was obtained when homoallyl-modified asparagine **5p** (0.18 g, 0.34 mmol) was reacted with catalyst **1** or **2** (255  $\mu\text{l}$  of a 0.10 M solution in THF) in THF (0.60 mL) under Ar(g). The residue was purified by column chromatography ( $\text{SiO}_2$ ; 0% to 66% EtOAc in hexane) to afford 0.24 g (70%) of the product **6p** as a white solid.  $^1\text{H}$  NMR (500 MHz,  $\text{CDCl}_3$ )  $\delta$  7.30–7.22 (m, 18H), 7.20–7.15 (m, 12H), 7.09 (bs, 2H), 6.84–6.71 (m, 2H), 6.19 (d,  $J = 7.7$  Hz, 2H), 5.45–5.31 (m, 2H), 4.40–4.37 (m, 2H), 3.26–3.18 (m, 4H), 2.97–2.94 (m, 2H), 2.57–2.43 (m, 2H), 2.24–2.09 (m, 4H), 1.41 (s, 18H).  $^{13}\text{C}$  NMR (126 MHz,  $\text{CDCl}_3$ )  $\delta$  171.20 (2C), 170.37 (2C), 144.31 (6C), 128.64 (12C), 128.61 (2C), 128.43 (2C), 127.99 (2C), 127.93 (12C), 127.90 (2C), 127.04 (6C), 70.68 (2C), 39.21 (2C), 29.70 (2C), 28.32 (6C), 27.29 (2C). HRMS (ESI)  $m/z$  calcd for  $\text{C}_{62}\text{H}_{70}\text{N}_6\text{O}_8$   $[\text{M}+\text{H}]^+$  : 1027.5255, found 1027.5251

**di-tert-butyl ((6*S*,17*S*)-3,7,16,20-tetraoxo-1,1,1,22,22,22-hexaphenyl-2,8,15,21-tetraazadocos-11-ene-6,17-diyl)dicarbamate (6q)**

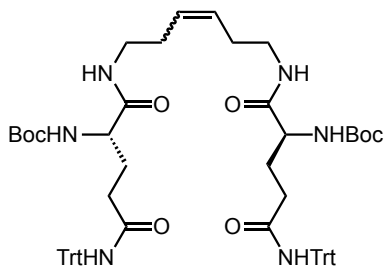

**6q:** C<sub>64</sub>H<sub>74</sub>N<sub>6</sub>O<sub>8</sub>  
Exact mass: 1054.5568

Following the procedure for **4**, the homodimerization product **6q** was obtained when homoallyl-modified glutamine **5q** (0.14 g, 0.26 mmol) was reacted with catalyst **1** or **2** (194  $\mu$ l of a 0.10 M solution in THF) in THF (0.45 mL) under Ar(g). The residue was purified by column chromatography (SiO<sub>2</sub>; 3:1 EtOAc:hexanes) to afford 0.20 g (74%) of the product **6q** as a white solid. <sup>1</sup>H NMR (500 MHz, CDCl<sub>3</sub>)  $\delta$  7.34–7.26 (m, 12H), 7.25–7.20 (m, 18H), 7.15 (bs, 2H), 6.75–6.64 (m, 2H), 5.62 (d, *J* = 7.7 Hz, 2H), 5.36–5.30 (m, 2H), 4.01–3.97 (m, 2H), 3.25–3.20 (m, 2H), 3.15–3.12 (m, 2H), 2.40–2.27 (m, 4H), 2.18–2.10 (m, 4H), 2.01–1.91 (m, 2H), 1.87–1.82 (m, 3H), 1.42 (s, 18H); <sup>13</sup>C NMR (126 MHz, CDCl<sub>3</sub>)  $\delta$  171.77 (2C), 155.91 (2C), 144.57 (6C), 128.83 (2C), 128.69 (12C), 127.95 (2C), 127.90 (12C), 126.94 (6C), 79.76 (2C), 70.53 (2C), 53.60 (2C), 38.78 (2C), 33.65 (2C), 29.75 (2C), 28.35 (6C), 27.60 (2C). HRMS (ESI) *m/z* calcd for C<sub>64</sub>H<sub>74</sub>N<sub>6</sub>O<sub>8</sub> [M+H]<sup>+</sup>: 1055.5568, found 1055.5549

**tetra-tert-butyl ((5*S*,5'*S*)-(hex-3-ene-1,6-diylbis(azanediyl))bis(6-oxohexane-6,1,5-triyl)tetracarbamate (6r)**

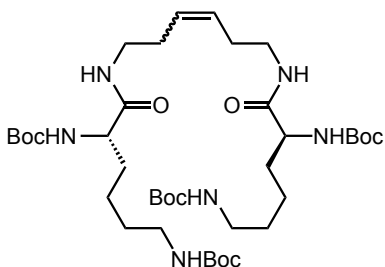

**6r:** C<sub>38</sub>H<sub>70</sub>N<sub>6</sub>O<sub>10</sub>  
Exact mass: 770.5153

Following the procedure for **4**, the homodimerization product **6r** was obtained when homoallyl-modified lysine **5r** (0.21 g, 0.53 mmol) was reacted with catalyst **1** or **2** (394  $\mu$ l of a 0.10 M solution in THF) in THF (0.92 mL) under Ar(g). The residue was purified by column chromatography (SiO<sub>2</sub>; 3:1 EtOAc:hexanes) to afford 0.32 mg (78%) of the product **6r** as a white solid. <sup>1</sup>H NMR (500 MHz, CDCl<sub>3</sub>)  $\delta$  7.24 (bs, 1H), 5.43–5.39 (m, 2H), 5.26 (d, *J* = 8.7 Hz, 2H), 4.68 (bs, 2H), 4.17–4.13 (m, 2H), 3.78–3.74 (m, 2H), 3.11–3.07 (m, 4H), 2.89–2.85 (m, 2H), 2.32–2.11 (m, 4H), 1.70 (m, 4H), 1.65–1.54 (m, 4H), 1.48–1.46 (m, 4H), 1.44 (s, 18H), 1.43 (s, 18H), 1.33–1.21 (m, 4H); <sup>13</sup>C NMR (126 MHz, CDCl<sub>3</sub>)  $\delta$  172.67 (2C), 156.04 (4C), 129.32 (2C), 79.89 (4C), 54.45 (2C), 40.15 (2C), 38.47 (2C), 32.34 (2C), 29.69 (2C), 29.63 (2C), 28.44 (6C), 28.34 (6C), 22.86 (2C). HRMS (ESI) *m/z* calcd for C<sub>38</sub>H<sub>70</sub>N<sub>6</sub>O<sub>10</sub> [M+H]<sup>+</sup>: 771.5153, found 771.5138

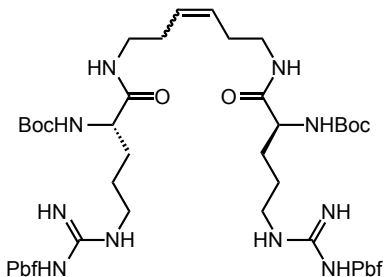

**6s:** C<sub>54</sub>H<sub>86</sub>N<sub>10</sub>O<sub>12</sub>S<sub>2</sub>  
Exact mass: 1130.5868

**di-tert-butyl ((6*S*,17*S*)-1,22-diimino-7,16-dioxo-1,22-bis((2,2,4,6,7-pentamethyl-2,3-dihydrobenzofuran)-5-sulfonamido)-2,8,15,21-tetraazadocos-11-ene-6,17-diyl)dicarbamate (6s)**

Following the procedure for **4**, the homodimerization product **6s** was obtained when homoallyl-modified arginine **5s** (0.14 g, 0.24 mmol) was reacted with catalyst **1** or **2** (181  $\mu$ l of a 0.10 M solution in THF) in THF (0.42 mL) under Ar(g). The residue was purified by column chromatography (SiO<sub>2</sub>; 0% to 2% MeOH in EtOAc) to afford 93 mg (34%) of the product **6s** as a white solid. <sup>1</sup>H NMR (500 MHz, CD<sub>3</sub>OD)  $\delta$  7.95–7.93 (m, 1H), 7.87–7.85 (m, 1H), 5.44–5.42 (m, 2H), 4.09–3.95 (m, 2H), 3.28–3.07 (m, 8H), 2.99 (s, 4H), 2.57 (s, 6H), 2.51 (s, 6H), 2.30–2.25 (m, 2H), 2.18–2.16 (m, 2H), 2.07 (s, 6H), 1.73–1.69 (m, 2H), 1.63–1.49 (m, 6H), 1.44 (s, 12H) 1.42 (s, 18H); <sup>13</sup>C NMR (126 MHz, CD<sub>3</sub>OD)  $\delta$  176.57 (2C), 173.66 (2C), 158.45 (2C), 156.69 (2C), 156.33 (2C), 137.98 (2C), 132.91 (2C), 132.09 (2C), 124.59 (2C), 117.02 (2C), 86.25 (2C), 79.19 (2C), 54.37 (2C), 42.57 (2C), 39.93 (2C), 38.69 (2C), 32.21 (2C), 29.42 (2C), 27.36 (4C), 27.33 (6C), 25.74 (2C), 18.22 (2C), 17.04 (2C), 11.14 (2C). HRMS (ESI) *m/z* calcd for C<sub>54</sub>H<sub>86</sub>N<sub>10</sub>O<sub>12</sub>S [M+H]<sup>+</sup> : 1131.5868, found 1131.5877

### General Procedure for Cross Metathesis of Amino Acids

#### *tert*-butyl ((6*S*,17*S*)-6-isopropyl-2,2-dimethyl-4,7,16-trioxo-3-oxa-5,8,15-triazaoctadec-11-en-17-yl)carbamate (**7**)

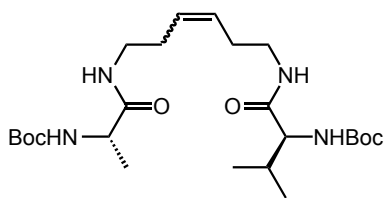

**7**: C<sub>24</sub>H<sub>44</sub>N<sub>4</sub>O<sub>6</sub>  
Exact mass: 484.3261

A round bottom flask was charged with Boc-protected homoallyl alanine **3** (50 mg, 0.20 mmol) and the cross partner homoallyl valine **5a** (223 mg, 0.80 mmol, 4 eq.) under a gentle stream of Ar(g). To this was added anhydrous THF (0.40 mL). A solution of catalyst **1** or **2** (155  $\mu$ l of a 0.10 M solution in THF) was added and the reaction mixture was heated to 40°C and stirred

for 4h. The solution was cooled to room temperature and then quenched with an excess of ethyl vinyl ether (0.50 mL, 5.2 mmol). The solvent was removed *in vacuo* and the residue purified by column chromatography (SiO<sub>2</sub>; 0% to 66% EtOAc in hexane) to afford 61 mg (60%) of product **7** as a white solid. <sup>1</sup>H NMR (500 MHz, CDCl<sub>3</sub>)  $\delta$  7.24 (bs, 1H), 5.46–5.36 (m, 2H), 5.29–5.24 (m, 2H), 4.34–4.25 (m, 1H), 3.90 (dd, *J* = 9.4, 7.4 Hz, 1H), 3.78–3.73 (m, 2H), 2.94–2.82 (m, 2H), 2.31–2.12 (m, 4H), 1.98–1.89 (m, 2H), 1.43 (s, 18H), 1.33 (d, *J* = 7.0 Hz, 3H), 0.94 (dd, *J* = 6.8, 4.5 Hz, 6H); <sup>13</sup>C NMR (126 MHz, CDCl<sub>3</sub>)  $\delta$  173.49, 172.14, 156.21, 155.76, 129.25 (2C), 79.85, 79.72, 60.33, 50.09, 38.63, 38.41, 30.94, 29.67, 28.33 (6C), 28.03, 19.24, 18.51 (2C). HRMS (ESI) *m/z* calcd for C<sub>24</sub>H<sub>44</sub>N<sub>4</sub>O<sub>6</sub> [M+H]<sup>+</sup> : 485.3261, found 485.3258

#### *tert*-butyl ((6*S*,17*S*,*Z*)-2,2-dimethyl-4,7,16-trioxo-6-((3-((2,2,4,6,7-pentamethyl-2,3-dihydrobenzofuran-5-yl)sulfonyl)guanidino)methyl)-3-oxa-5,8,15-triazaoctadec-11-en-17-yl)carbamate (**8**)

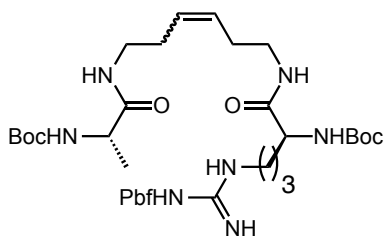

**8**: C<sub>38</sub>H<sub>63</sub>N<sub>7</sub>O<sub>9</sub>S  
Exact mass: 793.4408

Following the procedure for **7**, the cross product **8** was obtained when homoallyl-modified arginine **5s** (50 mg, 0.086 mmol) was reacted with alanine **3** (84

mg, 0.35 mmol, 4 eq.) in THF (0.17 mL) in the presence of catalyst **1** or **2** (65  $\mu$ l of a 0.10 M solution in THF) under Ar(g). The residue was purified by column chromatography (SiO<sub>2</sub>; 0% to 2% MeOH in EtOAc) to afford 28 mg (41%) of the product **6s** as a white solid. <sup>1</sup>H NMR (500 MHz, CDCl<sub>3</sub>)  $\delta$  7.13 (bs, 1H), 6.93 (bs, 1H), 6.35 (bs, 2H), 5.74 (bs, 1H), 5.65 (bs, 1H), 5.45–5.36 (m, 2H), 4.34–4.13 (m, 2H), 3.40–3.16 (m, 6H), 2.95 (s, 2H), 2.59 (s, 3H), 2.52 (s, 3H), 2.24–2.17 (m, 4H), 2.09 (s, 3H), 1.77 (bs, 1H), 1.61–1.53 (m, 3H), 1.46 (s, 6H), 1.41 (s, 18H), 1.33 (d,  $J$  = 7.0 Hz, 3H). <sup>13</sup>C NMR (126 MHz, CDCl<sub>3</sub>)  $\delta$  173.70, 172.70, 158.68, 156.45, 155.77 (2C), 138.29, 133.17, 132.25, 129.77 (2C), 129.26, 124.51, 117.40, 86.27, 79.98 (2C), 53.83, 50.38, 43.29, 40.28, 38.91, 38.60, 32.61, 30.29, 28.54 (2C), 28.36 (3C) 28.35 (3C), 25.51, 19.20, 18.47, 17.86, 12.37. HRMS (ESI)  $m/z$  calcd for C<sub>24</sub>H<sub>44</sub>N<sub>4</sub>O<sub>6</sub> [M+H]<sup>+</sup>: 794.4408, found 794.4411

### Synthesis of Allyl-Modified Amino Acids

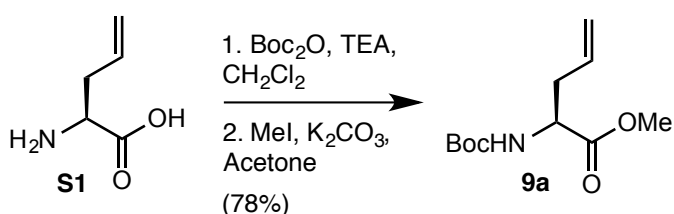

### Methyl (S)-2-((tert-butoxycarbonyl)amino)pent-4-enoate (**9a**)

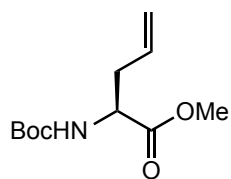

**9a**: C<sub>11</sub>H<sub>19</sub>NO<sub>4</sub>  
Exact mass: 229.1314

The Boc-protected allyl glycine **9a** was synthesized using a two-step procedure starting from allyl glycine. Briefly, to a stirring suspension of (S)-allyl glycine **S1** (2.0 g, 17.3 mmol) in CH<sub>2</sub>Cl<sub>2</sub> (25 mL) was added triethylamine (TEA, 1.9 mL, 26.0 mmol, 1.5 eq.) under Ar(g). The solution was cooled to 0°C by immersion in an ice bath. Di-*tert*-butyl dicarbonate (5.6 g, 26.0 mmol, 1.5 eq.) was dissolved in CH<sub>2</sub>Cl<sub>2</sub> (10 mL) and added dropwise to the stirring solution. The reaction was removed from the ice bath and allowed to stir at room temperature for 12 h. The crude mixture was diluted with H<sub>2</sub>O (10 mL) and extracted with 1 M HCl (3 x 10 mL), brine (3 x 10 mL), and dried over Na<sub>2</sub>SO<sub>4</sub>. The solvent was removed *in vacuo* to afford a light yellow oil which was carried on to the next step without further purification.

To the oil was added acetone (20 mL) and solid K<sub>2</sub>CO<sub>3</sub> (4.8 g, 34.6 mmol, 2 eq.) at room temperature. The reaction was stirred for 10 min, followed by the addition of iodomethane (2.2 mL, 34.6 mmol, 2 eq.) and the mixture stirred for 12 h. The solvent was evaporated and the residue taken up in EtOAc (25 mL) and washed with saturated Na<sub>2</sub>S<sub>2</sub>O<sub>3</sub> (2 x 20 mL), brine (2 x 20 mL), and dried over Na<sub>2</sub>SO<sub>4</sub>. The solvent was removed *in vacuo* and the crude residue was purified by flash chromatography (3:1 Hex:EtOAc) to afford 3.1 g (78%) of **9a** as a colorless oil. <sup>1</sup>H NMR (500 MHz, CDCl<sub>3</sub>)  $\delta$  5.64 (ddt,  $J$  = 16.5, 10.7, 7.2 Hz, 1H), 5.15–4.99 (m, 3H), 4.39–4.25 (m, 1H), 3.68 (s, 3H), 2.56–2.35 (m, 2H), 1.39 (s, 9H); <sup>13</sup>C NMR (126 MHz,

CDCl<sub>3</sub>)  $\delta$  172.47, 155.13, 132.29, 118.95, 79.76, 52.86, 52.14, 36.69, 28.22 (3C).  
HRMS (ESI)  $m/z$  calcd for C<sub>11</sub>H<sub>19</sub>NO<sub>4</sub> [M+H]<sup>+</sup> : 230.1314, found 230.1317

### Synthesis of homoallyl-modified amino acids

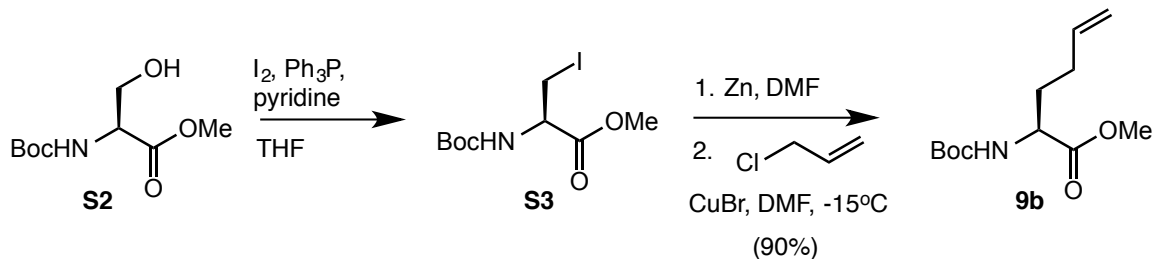

### Methyl (S)-2-((tert-butoxycarbonyl)amino)hex-5-enoate (9b)

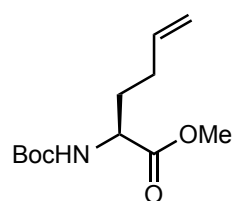

**9b:** C<sub>12</sub>H<sub>21</sub>NO<sub>4</sub>  
Exact mass: 243.1471

Boc-homoallyl glycine **9b** was synthesized using a three-step protocol from commercially available Boc-Ser-OMe (**S2**). In a typical procedure, a flask was charged with Boc-Ser-OMe (2.0 g, 9.1 mmol) and triphenylphosphine (3.6 g, 13.7 mmol, 1.5 eq.) under Ar(g). To this was added THF (20 mL) and the solution cooled to 0°C by immersion in an ice bath. Pyridine (1.5 mL, 18.2 mmol, 2 eq.) was added dropwise, followed by solid iodine (3.5 g, 13.7 mmol, 1.5 eq.) in three portions at 0°C. The ice bath was removed and stirring was continued for 4 h at room temperature. The mixture was extracted with Et<sub>2</sub>O (3 x 20 mL). The combined organic layers were washed with 1M HCl (3 x 20 mL), 1M Na<sub>2</sub>S<sub>2</sub>O<sub>3</sub> (2 x 20 mL), brine (2 x 20 mL) and dried over Na<sub>2</sub>SO<sub>4</sub>, filtered and concentrated *in vacuo*. The crude residue was of sufficient purity to be used in the next step without further purification.

The iodopropanoate **S3** was dissolved in DMF (5 mL) and added dropwise to a flask containing activated zinc (2.4 g, 36.4 mmol, 4 eq.) at 0°C under Ar(g). The reaction mixture was removed from the ice bath and allowed to stir at room temperature for 3 h, upon which TLC (4:1 petroleum ether: EtOAc) indicated loss of starting material and formation of a lower R<sub>f</sub> spot. At this point, the reaction mixture was stopped to let the solid settle to the bottom. The supernatant was then carefully transferred by syringe to a suspension of copper(I) bromide (0.26 g, 1.8 mmol) in DMF (mL) at -15°C that also contained allyl chloride (1.3 mL, 15.5 mmol, 1.7 eq.). After complete addition, the cooling bath was removed and stirring was continued overnight. At this point, EtOAc (20 mL) was added to the reaction mixture and stirring was continued for 15 min. To the mixture was added H<sub>2</sub>O (20 mL), the organic layer was removed and successively washed with 1M Na<sub>2</sub>S<sub>2</sub>O<sub>3</sub> (2 x 20 mL), H<sub>2</sub>O (2 x 20 mL), brine (2 x 20 mL), and dried over Na<sub>2</sub>SO<sub>4</sub>, filtered and concentrated *in vacuo*. The crude residue was purified by flash chromatography (SiO<sub>2</sub>, 8:1 petroleum ether:EtOAc) to afford 2.0 g (90%) of **9b** as a colorless oil. <sup>1</sup>H NMR (500 MHz, CDCl<sub>3</sub>)  $\delta$  5.72 (ddt,  $J$  = 16.9, 10.2, 6.6 Hz, 1H), 5.18–5.07 (m, 1H), 5.01–4.90 (m, 2H), 4.26–4.23 (m, 1H), 3.67 (s, 3H), 2.08–2.01 (m, 2H), 1.88–1.79 (m, 1H), 1.70–1.61

(m, 1H), 1.37 (s, 9H);  $^{13}\text{C}$  NMR (126 MHz,  $\text{CDCl}_3$ )  $\delta$  173.11, 155.23, 136.87, 115.50, 79.64, 52.09, 51.99, 31.85, 29.39, 28.21 (3C). HRMS (ESI)  $m/z$  calcd for  $\text{C}_{12}\text{H}_{21}\text{NO}_4$   $[\text{M}+\text{H}]^+$ : 244.1471, found 244.1474

### Methyl O-allyl-N-(tert-butoxycarbonyl)-L-serine (**9c**)

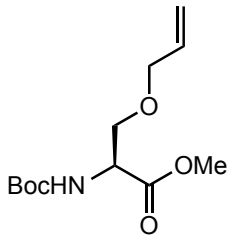

**9c**:  $\text{C}_{12}\text{H}_{21}\text{NO}_5$   
Exact mass: 259.1420

A solution of Boc-Ser-OMe **S2** (2.0 g, 9.1 mmol) in anhydrous THF (40 mL) was degassed and treated with allylmethyl carbonate (1.4 mL, 12.7 mmol, 1.4 eq). Tetrakis(triphenylphosphine)palladium (0.21 g, 0.18 mmol, 0.02 eq.) was added and the reaction mixture heated to 60°C for 4 h upon which TLC (2:1 EtOAc:hexanes) indicated loss of starting material. The solvent was removed under reduced pressure and the residue was diluted with EtOAc (30 mL) and washed with  $\text{NaHCO}_3$  (2 x 30 mL) and brine (30 mL). The

organic layer was dried over  $\text{MgSO}_4$ , filtered, and concentrated under reduced pressure. The residue was purified by column chromatography ( $\text{SiO}_2$ ; 0% to 66% EtOAc in hexane) to afford 1.6 g (68%) of the product **9c** as a clear oil.  $^1\text{H}$  NMR (500 MHz,  $\text{CDCl}_3$ )  $\delta$  5.79 (ddt,  $J = 17.3, 10.4, 5.6$  Hz, 1H), 5.41–5.31 (m, 1H), 5.25–5.10 (m, 2H), 4.40–4.37 (m, 1H), 3.95–3.92 (m, 2H), 3.80 (dd,  $J = 9.5, 3.3$  Hz, 1H), 3.71 (s, 3H), 3.61 (dd,  $J = 9.5, 3.4$  Hz, 1H), 1.41 (s, 9H);  $^{13}\text{C}$  NMR (126 MHz,  $\text{CDCl}_3$ )  $\delta$  171.11, 155.42, 134.01, 117.29, 79.85, 72.14, 69.86, 53.92, 52.37, 28.25 (3C). HRMS (ESI)  $m/z$  calcd for  $\text{C}_{12}\text{H}_{21}\text{N}_5\text{O}_5$   $[\text{M}+\text{H}]^+$ : 260.1420, found 260.1428

### Methyl S-allyl-N-(tert-butoxycarbonyl)-L-cysteine (**9d**)

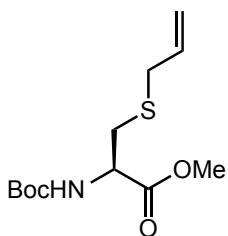

**9d**:  $\text{C}_{12}\text{H}_{21}\text{NO}_4\text{S}$   
Exact mass: 275.1191

Following the procedure for **9c**, the allyl-protected cysteine **9d** was obtained when Boc-Cys-OMe (1.8 g, 7.6 mmol) was treated with allylmethyl carbonate (1.2 mL, 10.7 mmol, 1.4 eq.) and tetrakis(triphenylphosphine)palladium (0.17 g, 0.15 mmol, 0.02 eq.) in THF (30 mL). The residue was purified by column chromatography ( $\text{SiO}_2$ ; 0% to 25% EtOAc in hexane) to afford 1.4 g (69%) of the product **9d** as a clear oil.  $^1\text{H}$  NMR (500 MHz,  $\text{CDCl}_3$ )  $\delta$  5.70 (ddt,  $J = 16.9, 9.6, 7.2$  Hz, 1H), 5.38–5.29 (m, 1H), 5.12–5.04 (m, 2H), 4.48–4.46 (m, 1H), 3.72 (s, 3H), 3.13–3.03 (m, 2H), 2.88 (dd,  $J = 13.9, 5.0$  Hz, 1H), 2.80 (dd,  $J = 13.9, 5.7$  Hz, 1H), 1.41 (s, 9H);  $^{13}\text{C}$  NMR (126 MHz,  $\text{CDCl}_3$ )  $\delta$  171.55, 155.06, 133.62, 117.78, 80.00, 53.10, 52.45, 35.07, 32.76, 28.25 (3C). HRMS (ESI)  $m/z$  calcd for  $\text{C}_{12}\text{H}_{21}\text{NO}_4\text{S}$   $[\text{M}+\text{H}]^+$ : 276.1191, found 276.1188

## Procedure for homodimerization of allyl-modified amino acids

### dimethyl (2*S*,7*S*,*Z*)-2,7-bis((*tert*-butoxycarbonyl)amino)oct-4-enedioate (**10a**)

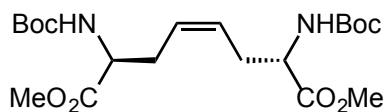

**10a:** C<sub>20</sub>H<sub>34</sub>N<sub>2</sub>O<sub>8</sub>  
Exact mass: 430.2315

Allyl-modified glycine **9a** (0.18 g, 0.79 mmol) was dissolved in THF (1.5 mL) under a gentle stream of Ar(g). A solution of catalyst **1** or **2** in THF (588  $\mu$ l of a 0.10 M solution in THF) was added and the reaction heated to 40°C and stirred for 4 h. The solution was allowed to cool to room temperature upon which an excess of ethyl vinyl ether (0.5 mL, 5.2 mmol) was added to quench the reaction. The solvent was removed *in vacuo* and the residue purified by column chromatography (SiO<sub>2</sub>; 0% to 25% EtOAc in hexane) to afford 0.15 g (45%) of product **10a** as a clear oil. <sup>1</sup>H NMR (500 MHz, CDCl<sub>3</sub>)  $\delta$  5.50–5.46 (m, 2H), 5.17 (d, *J* = 8.3 Hz, 2H), 4.44–4.40 (m, 2H), 3.75 (s, 6H), 2.62–2.54 (m, 2H), 2.47–2.42 (m, 2H), 1.45 (s, 18H); <sup>13</sup>C NMR (126 MHz, CDCl<sub>3</sub>)  $\delta$  172.36 (2C), 155.09 (2C), 127.32 (2C), 109.99 (2C), 80.11 (2C), 52.87 (2C), 52.36 (2C), 30.40 (3C), 28.27 (3C). HRMS (ESI) *m/z* calcd for C<sub>20</sub>H<sub>34</sub>N<sub>2</sub>O<sub>8</sub> [M+H]<sup>+</sup>: 431.2315, found 431.2318

### dimethyl (2*S*,9*S*,*Z*)-2,9-bis((*tert*-butoxycarbonyl)amino)dec-5-enedioate (**10b**)

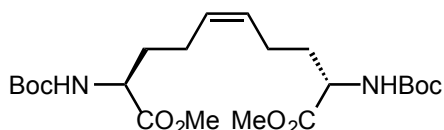

**10b:** C<sub>22</sub>H<sub>38</sub>N<sub>2</sub>O<sub>8</sub>  
Exact mass: 458.2628

Following the procedure for **10a**, the homodimerization product **10b** was obtained when homoallyl-modified glycine **9b** (0.13 g, 0.53 mmol) was reacted with catalyst **1** or **2** (395  $\mu$ l of a 0.10 M solution in THF) in THF (1.1 mL) under Ar(g). The residue was purified by column chromatography (SiO<sub>2</sub>; 3:1 EtOAc:hexanes) to afford 0.14 g (58%) of the product **10b** as a clear oil. <sup>1</sup>H NMR (300 MHz, CDCl<sub>3</sub>)  $\delta$  5.43–5.37 (m, 2H), 5.07 (d, *J* = 8.4 Hz, 2H), 4.32–4.25 (m, 2H), 3.74 (s, 6H), 2.12–2.04 (m, 4H), 1.94–1.76 (m, 2H), 1.74–1.64 (m, 2H), 1.48 (s, 18H); <sup>13</sup>C NMR (126 MHz, CDCl<sub>3</sub>)  $\delta$  173.15 (2C), 155.34 (2C), 129.31 (2C), 79.89 (2C), 63.96 (2C), 52.13 (2C), 32.48 (2C), 28.30 (6C), 23.18 (2C). HRMS (ESI) *m/z* calcd for C<sub>22</sub>H<sub>38</sub>N<sub>2</sub>O<sub>8</sub> [M+H]<sup>+</sup>: 459.2628, found 459.2631

### methyl (6*S*,15*S*,*Z*)-15-((*tert*-butoxycarbonyl)amino)-6-(methoxycarbonyl)-2,2-dimethyl-4-oxo-3,8,13-trioxa-5-azahexadec-10-en-16-oate (**10c**)

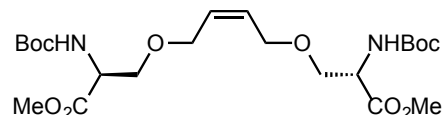

**10c:** C<sub>22</sub>H<sub>38</sub>N<sub>2</sub>O<sub>10</sub>  
Exact mass: 490.2526

Following the procedure for **10a**, the homodimerization product **10c** was obtained when allyl-modified serine **9c** (0.14 g, 0.54 mmol) was reacted with catalyst **1** or **2** (400  $\mu$ l of a 0.10 M solution in THF) in THF (1.0 mL) under Ar(g). The residue was purified by column chromatography (SiO<sub>2</sub>; 0% to 33% EtOAc in hexanes) to afford 0.17 g (67%) of the



product **10c** as a clear oil.  $^1\text{H}$  NMR (500 MHz,  $\text{CDCl}_3$ )  $\delta$  5.67–5.62 (m, 2H), 5.37 (d,  $J$  = 8.8 Hz, 2H), 4.46–4.39 (m, 2H), 4.05–3.99 (m, 4H), 3.85–3.81 (m, 2H), 3.76 (s, 6H), 3.66–3.60 (m, 2H), 1.45 (s, 18H);  $^{13}\text{C}$  NMR (126 MHz,  $\text{CDCl}_3$ )  $\delta$  171.08 (2C), 155.44 (2C), 129.06 (2C), 80.02 (2C), 70.15 (2C), 66.97 (2C), 53.92 (2C), 52.49 (2C), 28.31 (6C). HRMS (ESI)  $m/z$  calcd for  $\text{C}_{22}\text{H}_{38}\text{N}_2\text{O}_{10}$   $[\text{M}+\text{H}]^+$  : 491.2526, found 491.2533

### methyl (6*R*,15*R*,*Z*)-15-((*tert*-butoxycarbonyl)amino)-6-(methoxycarbonyl)-2,2-dimethyl-4-oxo-3-oxa-8,13-dithia-5-azahexadec-10-en-16-oate (**10d**)

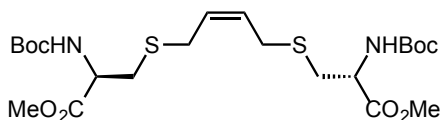

**10d**:  $\text{C}_{22}\text{H}_{38}\text{N}_2\text{O}_8\text{S}_2$   
Exact mass: 522.2070

Following the procedure for **10a**, the homodimerization product **10d** was obtained when allyl-modified cysteine **9d** (0.15 g, 0.54 mmol) was reacted with catalyst **1** or **2** (400  $\mu\text{l}$  of a 0.1 M solution in THF) in THF (1.0 mL) under  $\text{Ar}(\text{g})$ . The residue was purified by column chromatography ( $\text{SiO}_2$ ; 0% to 33% EtOAc in hexanes) to afford 0.20 g (71%) of the product **10d** as a clear oil.  $^1\text{H}$  NMR (300 MHz,  $\text{CDCl}_3$ )  $\delta$  5.60 (td,  $J$  = 5.1, 2.5 Hz, 2H), 5.40 (d,  $J$  = 8.1 Hz, 2H), 4.60–4.45 (m, 2H), 3.76 (s, 6H), 3.29–3.15 (m, 4H), 2.90 (m, 4H), 1.45 (s, 18H);  $^{13}\text{C}$  NMR (126 MHz,  $\text{CDCl}_3$ )  $\delta$  171.54 (2C), 155.16 (2C), 128.31 (2C), 80.17 (2C), 53.31 (2C), 52.57 (2C), 33.95 (2C), 28.76 (2C), 28.31 (6C). HRMS (ESI)  $m/z$  calcd for  $\text{C}_{22}\text{H}_{38}\text{N}_2\text{O}_8\text{S}_2$   $[\text{M}+\text{H}]^+$  : 523.3070, found 523.3081

### Procedure for cross metathesis of allyl modified amino acids and allyl acetate

#### methyl (*S*,*Z*)-6-acetoxy-2-((*tert*-butoxycarbonyl)amino)hex-4-enoate (**12a**)

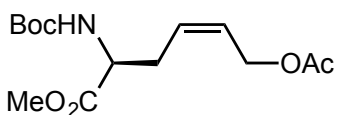

**12a**:  $\text{C}_{14}\text{H}_{23}\text{NO}_6$   
Exact mass: 301.1525

Boc-protected allyl glycine **9a** (0.15 g, 0.65 mmol) was dissolved in THF (1.1 mL) under a gentle stream of  $\text{Ar}(\text{g})$ . To this was added allyl acetate (0.35 mL, 3.3 mmol, 5 eq.), followed by a solution of catalyst **1** or **2** (490  $\mu\text{l}$  of a 0.10 M solution in THF). The reaction mixture was heated to 40°C and stirred for 4h. The solution was cooled to room temperature and then quenched with an excess of ethyl vinyl ether (0.5 mL, 5.2 mmol). The solvent was removed *in vacuo* and the residue purified by column chromatography ( $\text{SiO}_2$ ; 0% to 25% EtOAc in hexane) to afford 83 mg (42%) of product **12a** as a clear, colorless oil;  $^1\text{H}$  NMR (500 MHz,  $\text{CDCl}_3$ )  $\delta$  5.71–5.68 (m, 1H), 5.59–5.53 (m, 1H), 5.20 (d,  $J$  = 8.4 Hz, 1H), 4.63–4.52 (m, 2H), 4.42–4.32 (m, 1H), 3.73 (s, 3H), 2.69–2.49 (m, 2H), 2.05 (s, 3H), 1.42 (s, 9H);  $^{13}\text{C}$  NMR (126 MHz,  $\text{CDCl}_3$ )  $\delta$  172.21, 170.69, 155.17, 128.61, 127.40, 79.90, 59.77, 52.88, 52.26, 30.42, 28.25 (3C), 20.82. HRMS (ESI)  $m/z$  calcd for  $\text{C}_{14}\text{H}_{23}\text{NO}_6$   $[\text{M}+\text{H}]^+$  : 302.1525, found 302.1588

### methyl (*S,Z*)-7-acetoxy-2-((*tert*-butoxycarbonyl)amino)hept-5-enoate (**12b**)

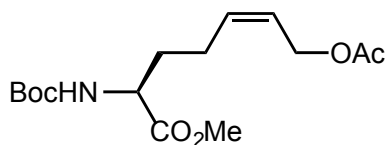

**12b:** C<sub>15</sub>H<sub>25</sub>NO<sub>6</sub>  
Exact mass: 315.1682

Following the procedure for **12a**, the cross product **12b** was obtained when homoallyl-modified glycine **9b** (0.14 g, 0.57 mmol) in THF (1.0 mL) was reacted with catalyst **1** or **2** (431  $\mu$ l of a 0.10 M solution in THF) in the presence of excess allyl acetate (0.31 mL, 2.9 mmol, 5 eq.). The residue was purified by column chromatography (SiO<sub>2</sub>; 0% to 20% EtOAc in hexane) to afford 0.10 g (56%) the product **12b** as a clear oil. <sup>1</sup>H NMR (300 MHz, CDCl<sub>3</sub>)  $\delta$  5.65–5.48 (m, 2H), 5.08 (d, *J* = 8.5 Hz, 1H), 4.66–4.51 (m, 2H), 4.32–4.26 (m, 1H), 3.72 (s, 3H), 2.23–2.09 (m, 2H), 2.04 (s, 3H), 1.97–1.80 (m, 1H), 1.78–1.61 (m, 1H), 1.43 (s, 9H); <sup>13</sup>C NMR (126 MHz, CDCl<sub>3</sub>)  $\delta$  172.96, 170.70, 155.28, 133.10, 124.85, 79.90, 60.04, 52.96, 52.16, 32.34, 28.26 (3C), 23.47, 20.82. HRMS (ESI) *m/z* calcd for C<sub>15</sub>H<sub>25</sub>NO<sub>6</sub> [M+H]<sup>+</sup> : 316.1682, found 316.1690

### methyl (*Z*)-O-(4-acetoxybut-2-en-1-yl)-*N*-((*tert*-butoxycarbonyl)-*L*-serine (**12c**)

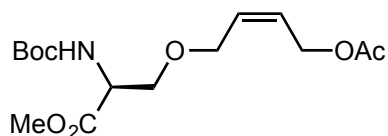

**12c:** C<sub>15</sub>H<sub>25</sub>NO<sub>7</sub>  
Exact mass: 331.1631

Following the procedure for **12a**, the cross product **12c** was obtained when homoallyl-modified serine **9c** (0.13 g, 0.50 mmol) in THF (0.88 mL) was reacted with catalyst **1** or **2** (375  $\mu$ l of a 0.10 M solution in THF) in the presence of excess allyl acetate (0.27 mL, 2.5 mmol, 5 eq.). The residue was purified by column chromatography (SiO<sub>2</sub>; 0% to 33% EtOAc in hexane) to afford 0.11 g (63%) of the product **12c** as a clear oil. <sup>1</sup>H NMR (500 MHz, CDCl<sub>3</sub>)  $\delta$  5.74–5.65 (m, 2H), 5.43–5.35 (m, 1H), 4.63–4.58 (m, 2H), 4.46–4.41 (m, 1H), 4.13–4.04 (m, 2H), 3.90–3.85 (m, 1H), 3.77 (s, 3H), 3.68–3.62 (m, 1H), 2.07 (s, 3H), 1.46 (s, 9H); <sup>13</sup>C NMR (126 MHz, CDCl<sub>3</sub>)  $\delta$  173.14, 172.71, 155.24, 136.90, 115.56, 79.77, 53.00, 52.13, 31.97, 29.41, 28.26 (3C), 28.23, 18.56. HRMS (ESI) *m/z* calcd for C<sub>15</sub>H<sub>25</sub>NO<sub>7</sub> [M+H]<sup>+</sup> : 332.1631, found 332.1638

### methyl (*Z*)-*S*-(4-acetoxybut-2-en-1-yl)-*N*-((*tert*-butoxycarbonyl)-*L*-cysteine (**12d**)

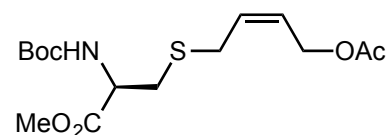

**12d:** C<sub>15</sub>H<sub>25</sub>NO<sub>6</sub>S  
Exact mass: 347.1403

Following the procedure for **12a**, the cross product **12d** was obtained when homoallyl-modified cysteine **9d** (0.14 g, 0.51 mmol) in THF (0.87 mL) was reacted with catalyst **1** or **2** (377  $\mu$ l of a 0.10 M solution in THF) in the presence of excess allyl acetate (0.27 mL, 2.5 mmol, 5 eq.). The residue was purified by column chromatography (SiO<sub>2</sub>; 0% to 33% EtOAc in hexane) to afford 0.11 g (62%) of the product **12d** as a clear oil. <sup>1</sup>H NMR (500 MHz, CDCl<sub>3</sub>)  $\delta$  5.73–5.63 (m, 2H), 5.38–5.30 (m, 1H), 4.68–4.58 (m, 2H), 4.57–4.51 (m, 1H), 3.77 (s, 3H), 3.28–3.21 (m, 2H), 2.95 (dd, *J* = 13.8, 4.9 Hz, 1H), 2.87 (dd, *J* = 13.8, 5.9 Hz, 1H), 2.06 (s, 3H), 1.45 (s, 9H); <sup>13</sup>C NMR (126 MHz, CDCl<sub>3</sub>)  $\delta$  171.41, 170.60, 155.09,

130.09, 126.61, 80.14, 59.55, 53.36, 52.44, 33.97, 29.08, 28.27 (3C), 20.81. HRMS (ESI)  $m/z$  calcd for  $C_{15}H_{25}NO_6S$   $[M+H]^+$  : 348.1403, found 348.1419

### General procedure for the synthesis of homoallyl-modified peptides

#### Boc-Ser(OtBu)-Asp(OtBu)-Phe-Ile-Gln(Trt)-Val homoallyl peptide 13

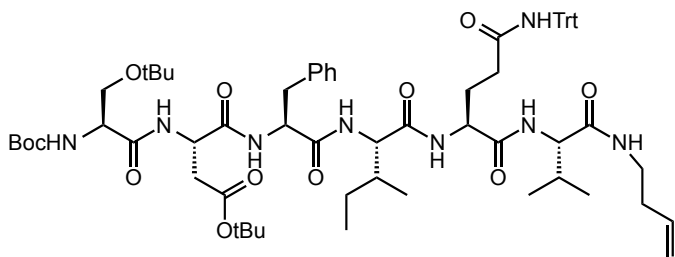

**13:**  $C_{68}H_{94}N_8O_{12}$   
Exact Mass: 1214.6991

Peptide **13** was synthesized by solution phase methods using iterative coupling of Fmoc-protected amino acids. Briefly, Boc-protected homoallyl-modified valine **5a** (1.0 g, 3.7 mmol) was dissolved in a mixture of 1:1 TFA:DCM (4 mL) and allowed to stir for 4 h at

room temperature upon which TLC (1:1 EtOAc:hexanes) indicated loss of starting material. The solution was diluted with  $CH_2Cl_2$  (30 mL) and the solvent was removed *in vacuo*. The crude residue was dissolved in a mixture of DMF (10 mL) and *N,N*-diisopropylethylamine (DIEA, 5.3 mL, 30.0 mmol, 8 eq.) and allowed to stir at room temperature for 20 min. At this point, a solution of Fmoc-Gln(Trt)-OH (4.5 g, 7.4 mmol, 2 eq.), HOBt (1.0 g, 7.4 mmol, 2 eq.), HBTU (2.8 g, 7.4 mmol, 2 eq.), and DIEA (2.6 mL, 14.8 mmol, 4 eq.) in DMF (8 mL) was added to the stirring solution. The reaction mixture was heated to 50°C and allowed to stir for 1 h. The solution was cooled to room temperature and quenched with  $H_2O$  (20 mL), and to this was added EtOAc (50 mL). The organic layer was removed and washed with  $H_2O$  (5 x 20 mL), brine (5 x 20 mL) and dried over  $MgSO_4$ . The solvent was removed *in vacuo* to afford the Fmoc-protected dipeptide as a white solid which was found to be of sufficient purity to be used in subsequent reactions.

The Fmoc-protected dipeptide (2.1 g, 2.7 mmol) was dissolved in a mixture of piperidine (3.0 mL, 30 mmol) in DMF (9.0 mL) and allowed to stir at room temperature for 1 h, upon which a white precipitate had formed. The precipitate was filter off, and the filtrate concentrated under reduced pressure. The crude filtrate was dissolved in EtOAc (50 mL) and extracted with  $H_2O$  (5 x 30 mL), brine (5 x 30 mL) and dried over  $MgSO_4$ . The solvent was removed *in vacuo* to afford a clear oil (1.3 g) which was used in the next step without further purification.

This iterative procedure was used for subsequent amino acid couplings, at each step monitoring the conversion by LC/MS. The termination of the peptide sequence was carried out using the requisite Boc-protected amino acid. After the final coupling, the crude peptide was dissolved in EtOAc (50 mL) and washed with  $H_2O$  (5 x 30 mL), brine (5 x 30 mL), and dried over  $MgSO_4$ . The solvent was removed *in vacuo* and the product purified by column chromatography ( $SiO_2$ ; 1:1 DCM:EtOAc + 1 to 5% MeOH) to afford a white solid ( $R_f$  = 0.45 in 1:1 DCM:EtOAc + 2% MeOH).  $^1H$  NMR (500 MHz,  $CDCl_3$  +  $CD_3OD$ )  $\delta$  7.79 (d,  $J$  = 8.3 Hz, 1H), 7.66 (d,  $J$  = 8.3 Hz, 1H), 7.44–7.32 (m, 3H), 7.25–7.09 (m, 17H), 5.75–5.65 (m, 1H), 5.48 (d,  $J$  = Hz, 1H), 5.04–4.91 (m, 2H), 4.37–4.35 (m, 1H), 4.33–4.24 (m, 2H), 4.19–4.14 (m, 2H), 4.02–3.97 (m,

2H), 3.79–3.77 (m, 2H), 3.56–3.54 (m, 4H), 3.21–3.19 (m, 4H), 2.57–2.25 (m, 4H), 2.22–2.14 (m, 4H), 2.07–1.92 (m, 3H), 1.85–1.80 (m, 2H), 1.43–1.42 (m, 2H), 1.41 (s, 18H) 1.38–1.35 (m, 6H), 1.13–1.11 (m, 14H), 0.89–0.79 (m, 9H);  $^{13}\text{C}$  NMR (126 MHz,  $\text{CDCl}_3 + \text{CD}_3\text{OD}$ )  $\delta$  172.87, 171.95, 171.93, 171.84, 171.63, 171.18, 170.52, 155.83, 144.50 (3C), 135.36, 129.03, 128.90, 128.70 (3C), 128.67 (3C), 128.57, 128.55, 127.71 (3C), 127.68, 126.77 (3C), 126.74, 126.60, 125.43, 117.87, 116.39, 110.47, 82.01, 80.70, 73.90, 73.53, 61.91, 59.06, 59.03, 58.96, 58.92, 54.02, 38.73, 35.76, 33.36, 33.33, 29.63, 28.22 (3C), 28.13, 27.88 (3C), 27.25, 27.23, 27.22, 27.17 (3C), 25.21, 19.21, 17.59, 17.55, 15.37, 11.03. HRMS (ESI)  $m/z$  calcd for  $\text{C}_{68}\text{H}_{94}\text{N}_8\text{O}_{12}$   $[\text{M}+\text{H}]^+$ : 1215.7016, found 1215.7082

### Boc-Lys(Boc)-Val-Leu-Tyr(OtBu)-Arg(Pbf)-Arg(Pbf) homoallyl peptide 14

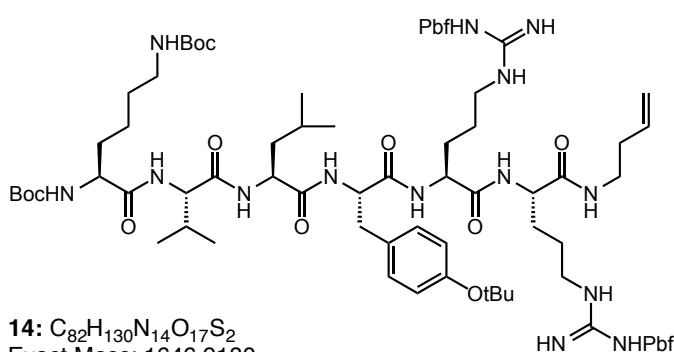

Peptide **14** was synthesized by iterative amino acid coupling in a manner analogous to that of peptide **13**. Purification of the final peptide was achieved by column chromatography ( $\text{SiO}_2$ ; 1:1 DCM:EtOAc + 1 to 5% MeOH) to afford a clear gel. ( $R_f = 0.55$  in 1:1 DCM:EtOAc + 10% MeOH).  $^1\text{H}$  NMR (500 MHz,  $\text{CDCl}_3$ )  $\delta$  7.87 (d,

$J = 6.7$  Hz, 1H), 7.54–7.35 (m, 5H), 7.17 (bs, 1H), 7.10–7.07 (m, 2H), 6.79–6.77 (m, 2H), 6.61 (bs, 1H), 6.28 (bs, 4H), 5.72–5.63 (m, 1H), 5.42 (m, 1H), 4.98–4.89 (m, 2H), 4.29–4.15 (m, 3H), 3.19–3.06 (m, 8H), 2.99–2.95 (m, 2H), 2.88–2.84 (m, 8H), 2.78–2.77 (m, 3H), 2.47–2.45 (m, 6H), 2.40–2.39 (m, 6H), 2.20–2.10 (m, 3H), 1.98–1.96 (m, 6H), 1.81–1.50 (m, 12H), 1.38 (s, 9H), 1.36 (s, 9H), 1.34 (s, 9H), 1.20 (m, 12H), 0.93–0.86 (m, 6H), 0.77–0.74 (m, 4H), 0.68–0.66 (m, 4H);  $^{13}\text{C}$  NMR (126 MHz,  $\text{CDCl}_3 + \text{CD}_3\text{OD}$ )  $\delta$  175.42, 174.51, 173.21, 172.91 (2C), 172.32, 162.89 (2C), 158.53, 157.30 (2C), 157.09, 156.43 (2C), 156.36, 153.99, 138.11 (2C), 135.18 (2C), 133.02, 132.06 (2C), 129.26 (2C), 124.45 (2C), 123.94 (2C), 117.32, 116.33, 86.29 (2C), 80.65, 79.30, 78.36, 61.40, 57.09, 56.46, 54.52, 54.31, 53.28, 43.12 (2C), 40.38 (2C), 39.49 (2C), 38.95 (2C), 36.44, 35.82, 33.24 (2C), 31.34, 28.65 (3C), 28.35 (3C), 28.29 (3C), 28.12 (2C), 25.31, 24.52, 22.55 (2C), 20.87 (2C), 18.98 (2C), 18.26 (2C), 17.69 (2C), 12.18 (2C). HRMS (ESI)  $m/z$  calcd for  $\text{C}_{82}\text{H}_{130}\text{N}_{14}\text{O}_{17}\text{S}_2$   $[\text{M}+\text{H}]^+$ : 1648.9180, found 1648.9332

### Procedure for the synthesis of peptide 15 by cross metathesis

A 1 mL vial was charged with peptides **13** (23 mg, 0.020 mmol) and **14** (33 mg, 0.020 mmol) under a gentle stream of Ar(g). To this was added THF (150  $\mu\text{L}$ ), followed by the addition of a solution of catalyst **2** (30  $\mu\text{L}$  of a 0.10 M solution in THF). The reaction mixture was heated to 40°C and stirred for 4h. The solution was cooled to room temperature and then quenched with an excess of ethyl vinyl ether

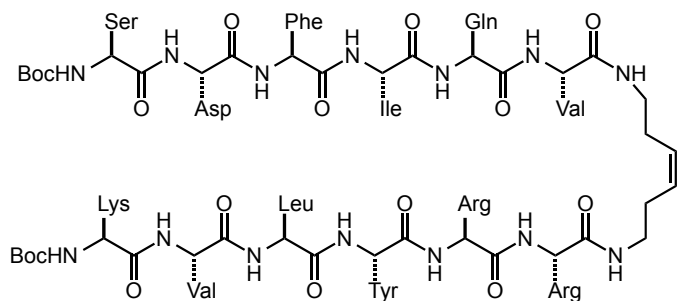

**15:** C<sub>148</sub>H<sub>220</sub>N<sub>22</sub>O<sub>29</sub>S<sub>2</sub>  
Exact mass: 2833.5858

(0.5 mL, 5.2 mmol). The solvent was removed *in vacuo* and the crude mixture analyzed by LC/MS to measure the extent of conversion. (R<sub>f</sub> of cross product = 0.32 in 1:1 DCM:EtOAc + 10% MeOH). HRMS (ESI) m/z calcd for C<sub>148</sub>H<sub>220</sub>N<sub>22</sub>O<sub>29</sub>S<sub>2</sub> [M + 2H]<sup>2+</sup> : 1418.7929, found 1418.7948

### HPLC of cross metathesis on homoallyl-modified peptides

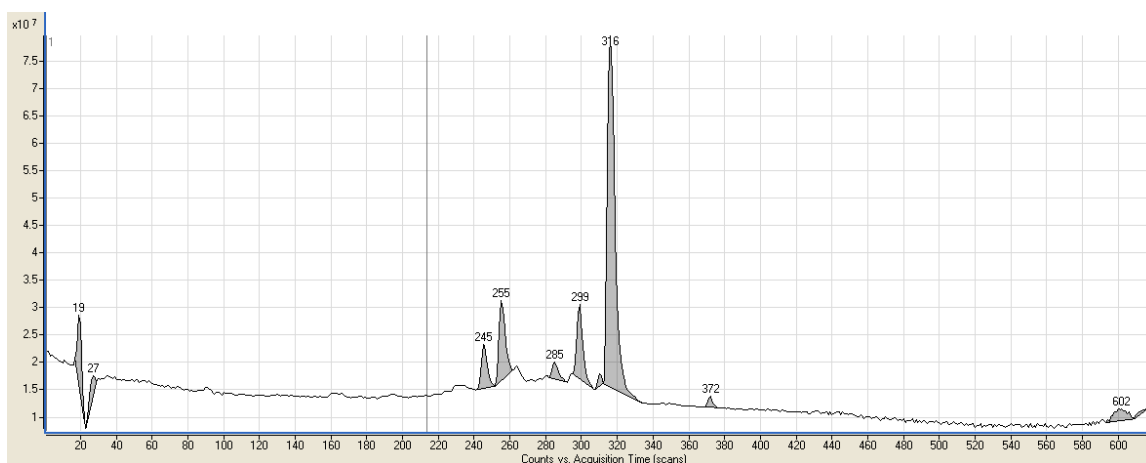

**Integration Peak List**

| Peak | Start | RT    | End   | Height   | Area      | Area % |
|------|-------|-------|-------|----------|-----------|--------|
| 1    | 15.9  | 17.8  | 20.7  | 12386573 | 26460330  | 8.75   |
| 2    | 21.6  | 25.5  | 27.4  | 3905537  | 17566003  | 5.81   |
| 3    | 232.4 | 235.3 | 242   | 8053681  | 30834550  | 10.2   |
| 4    | 242   | 244.9 | 251.7 | 14690565 | 58502397  | 19.35  |
| 5    | 270.9 | 273.8 | 280.5 | 3084830  | 11447913  | 3.79   |
| 6    | 283.4 | 287.3 | 295   | 13667409 | 51159099  | 16.92  |
| 7    | 295.9 | 297.8 | 299.8 | 2217449  | 5490372   | 1.82   |
| 8    | 299.8 | 303.6 | 320.9 | 64107804 | 302402244 | 100    |
| 9    | 354.6 | 357.5 | 363.3 | 1963344  | 6144511   | 2.03   |
| 10   | 570.2 | 578.9 | 585.6 | 2176804  | 18834639  | 6.23   |

**Figure S1:** Analytical HPLC to assess conversion for cross metathesis between peptides **13** and **14**. The percentage conversion was calculated by the ratio of cross product **15** (peak 8) to starting material (peaks 3 corresponding to **13** and peak 5 corresponding to **14**). The homodimers of **13** (peak 4) and **14** (peak 6) are also evident. HPLC conditions: 40-95% acetonitrile:H<sub>2</sub>O + 0.1% AcOH.

## Solid phase synthesis of peptides

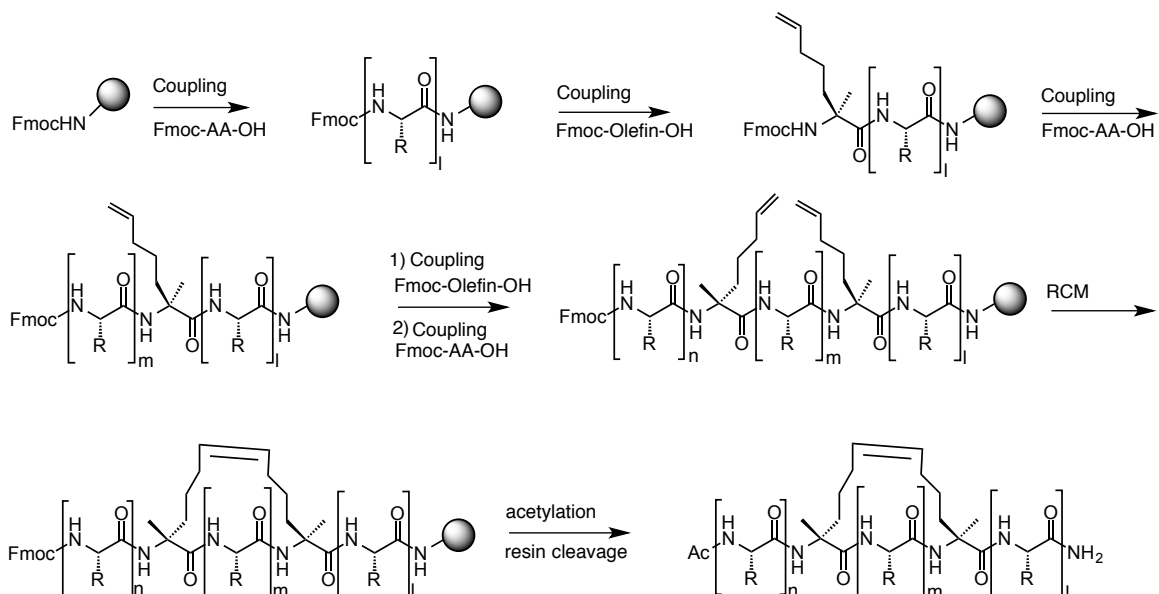

Peptides were produced on a Titan 357 (AAPPTec, Louisville, KY) automated peptide synthesizer using Rink Amide MBHA resin (NovaBioChem, 0.4 mmol/g resin), Wang resin (NovaBioChem, 0.5 mmol/g resin), or TentaGel MB RAM resin (RappPolymere, 0.4 mmol/g resin) at 40  $\mu$ mol scale. The resin was swelled with N-Methyl 2-pyrrolidinone (NMP, 10 mL) for 30 min before use. To load the first amino acid onto the resin, the resin-bound Fmoc-protecting group was removed by treatment with 25% (vol/vol) piperidine in NMP (2 x 10 min). Standard amino acids were coupled for 1 h using HATU as the activating agent (4 eq. based on loading capacity), Fmoc-protected amino acid (5 eq.), and N,N-diisopropylethylamine (DIEA, 10 eq.) in NMP. After each coupling or deprotection reaction, the resin was washed successively with DCM (1 x 1 min), NMP (1 x 1 min), DCM (1 x 1 min) and NMP (1 x 1 min). For the coupling of olefin amino acids, a reaction time of 2 h was used with Fmoc-(S)-2-(4-pentenyl)alanine (3 eq.) or Fmoc-(R)-2-(7-octenyl)alanine (3 eq.), HATU (3 eq.) and DIEA (6 eq.) in NMP. After the final amino acid coupling, the resin was washed with DCM (2 x 1 min) and dried *in vacuo* overnight.

## Sequence of peptides used in Z-selective RCM

Peptide **16**: Ac-Glu-Asp-Ile-Ile-Arg-Ile-S5\*-Arg-Leu-Leu-S5\*-Glu-Val-Gly-Asp

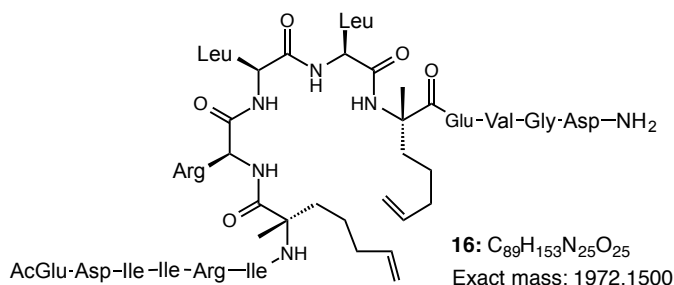

Peptide **18**: Ac-Leu-Ser-Gln-Glu-Tyr-Phe-R8\*-Asn-Leu-Trp-Lys-Leu-Leu-S5\*-Gln-Asp

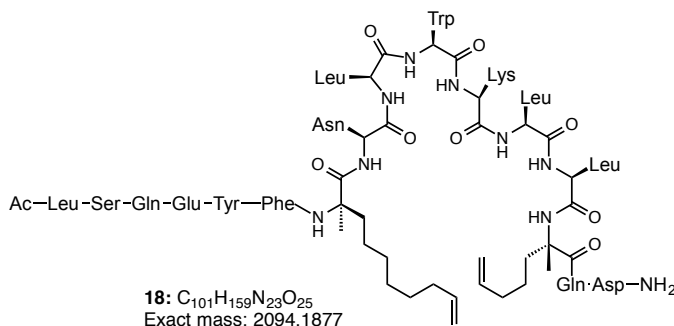

\*S5 denotes position of (S)-2-(4-pentenyl)alanine

\*R8 denotes position of (R)-2-(7-octenyl)alanine

## General procedure for Z-selective RCM on resin-bound olefinic peptides

The N-terminal modified peptide on resin (25 mg, 0.01 mmol) was dissolved in degassed dichloroethane (DCE, 2.0 mL). To this was added a stock solution of cyclometalated ruthenium catalyst **2** in degassed DCE (20  $\mu$ L of a 0.05 M solution in DCE). The reaction was stirred under a gentle stream of Ar(g) for 2 h, the catalyst was filtered off, and the resin washed first with DCE (5 x 2 min) and then with DMF (2 x 2 min). Exposure of the resin bound peptide to an additional round of catalyst stock solution (20  $\mu$ L) for 2 h ensured nearly quantitative conversion. Upon completion of RCM, the resin bound peptide was washed with DCE (2 x 2 min), DMF (2 x 2 min), and DCM (2 x 2 min) and dried under vacuum.

For N-terminal acetylation of the peptide, the resin was swelled with NMP (1 mL) for 20 min and then washed with NMP (2 x 1 min). The resin was treated with 25% (vol/vol) piperidine in NMP (2 mL), gently agitated for 20 min, and then drained. The resin was washed with DCM (5 x 2 min) and allowed to dry under a gentle stream of argon to afford the amine-terminated peptide. To this was added

NMP (1 mL), the resin was agitated for 10 min, and the solvent was drained. Acetic anhydride (30  $\mu$ L, 0.3 mmol, 30 eq.) in NMP (1.0 mL) was added, followed by N,N-diisopropylethylamine (DIEA, 104  $\mu$ L, 60 eq.) and the resin was agitated for 45 min at room temperature. The resin was washed with DCM (1 x 1 min), NMP (1 x 1 min), and DCM (1 x 1 min) and dried *in vacuo* overnight.

Cleavage of the peptide from the resin and global deprotection were achieved by reacting the resin with 95% TFA, 2.5% triisopropylsilane, 2.5% H<sub>2</sub>O (vol/vol/vol) for 2 h. The TFA and other volatiles were removed by evaporation under a stream of argon. The peptides were precipitated with cold diethyl ether (4 mL), vortexed, and collected by centrifugation. The pellet was dried under a gentle stream of argon and subsequently dissolved in a mixture of 50% acetonitrile, 50% H<sub>2</sub>O (vol/vol) and the resin was removed by filtration. The cleaved peptides were purified by reverse-phase HPLC using a Zorbax C<sub>8</sub> or C<sub>18</sub> column (Agilent, 5  $\mu$ m, 9.4 x 250 mm) and characterized by LC/MS TOF using a Zorbax C<sub>8</sub> column (Agilent, 3.5  $\mu$ m, 2.1 x 150 mm) or matrix-assisted laser desorption ionization time-of-flight (MALDI-TOF).

#### Representative Z-selective RCM across one turn of a helix

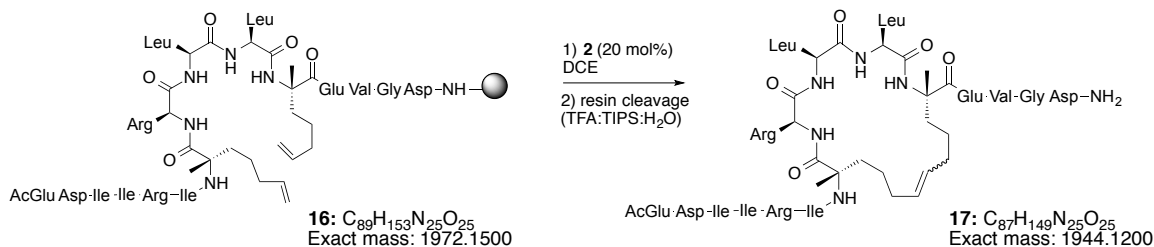

#### Representative Z-selective RCM across two helical turns

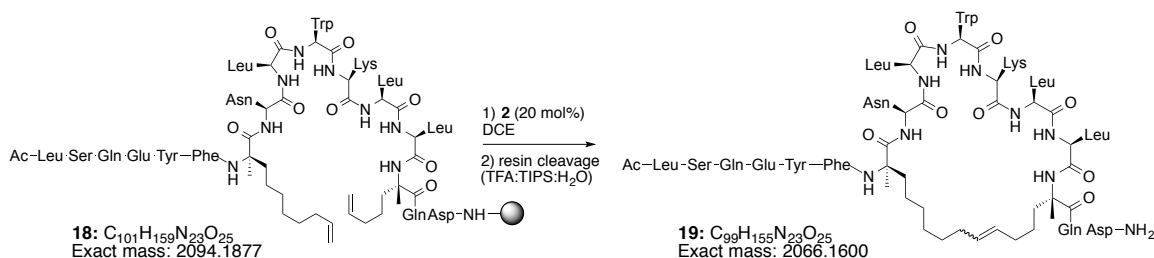

### Monitoring the conversion of RCM on resin-bound olefinic peptides

To measure the percentage conversion of RCM on peptides **16** and **18**, aliquots of the resin suspension (25  $\mu$ L) were taken from the reaction mixture at the indicated time points, quenched with ethyl vinyl ether (50  $\mu$ L), filtered, and washed with DCE (300  $\mu$ L). The resin was dried under a stream of argon and suspended in 100  $\mu$ L of the cleavage cocktail TFA/TIS/H<sub>2</sub>O (95:2.5:2.5) and allowed to stir at room temperature for 1 h. The TFA and other volatiles were removed by evaporation and



the crude residue dissolved in diethyl ether (200  $\mu$ L), vortexed, and centrifuged. The ether was carefully decanted and the pellet was dried under a stream of argon. The pellet was dissolved in 100  $\mu$ L of 50% (vol/vol) aqueous acetonitrile and filtered to afford the crude peptide. For LC/MS TOF analysis, 5  $\mu$ L of dissolved peptide was injected onto an analytical column (Eclipse Plus C<sub>8</sub> column (1.8  $\mu$ m, 2.1 x 50 mm)) operating in positive electrospray ionization (ESI) mode.

### Monitoring ring-closing metathesis on peptide **16**

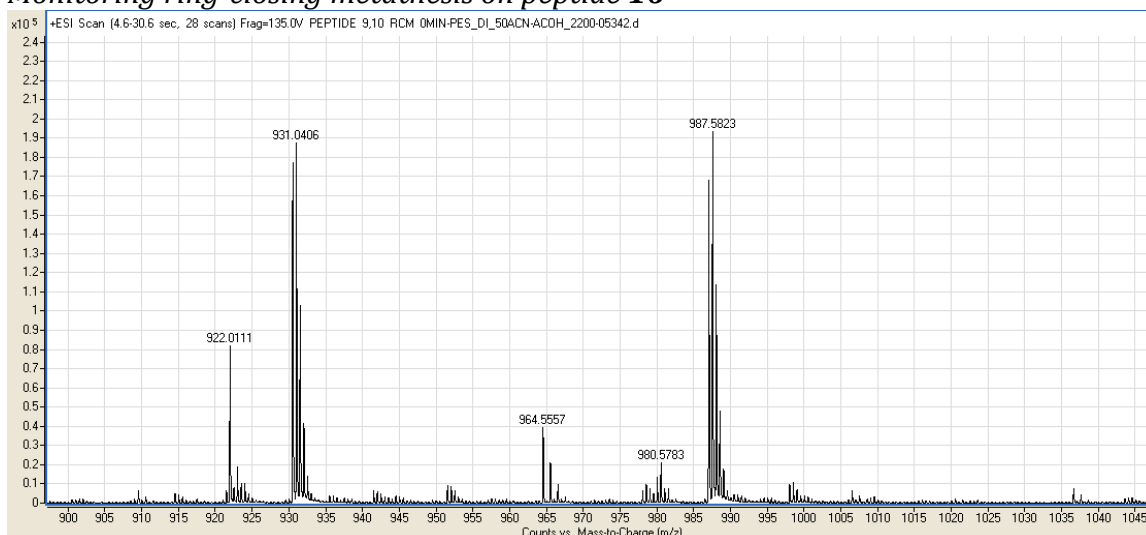

**Figure S2:** Evaluation of RCM on peptide **16** as a function of time ( $t = 0$  min). The indicated mass corresponding to starting material (987.5823) is observed as the  $[M+2H]^{2+}$  ion in ESI and was used to monitor the extent of conversion during the course of the reaction.

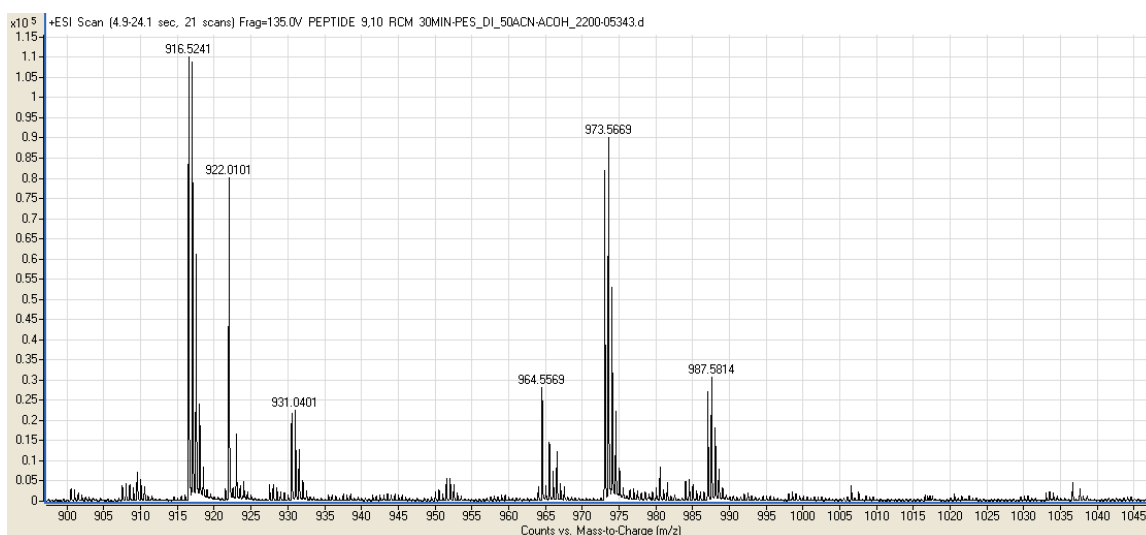

**Figure S3:** Evaluation of RCM on peptide **16** as a function of time ( $t = 30$  min). Indicated masses correspond to starting material **16** (987.5814) and product **17** (973.5669) as the  $[M+2H]^{2+}$  ion as measured by LC/MS TOF.

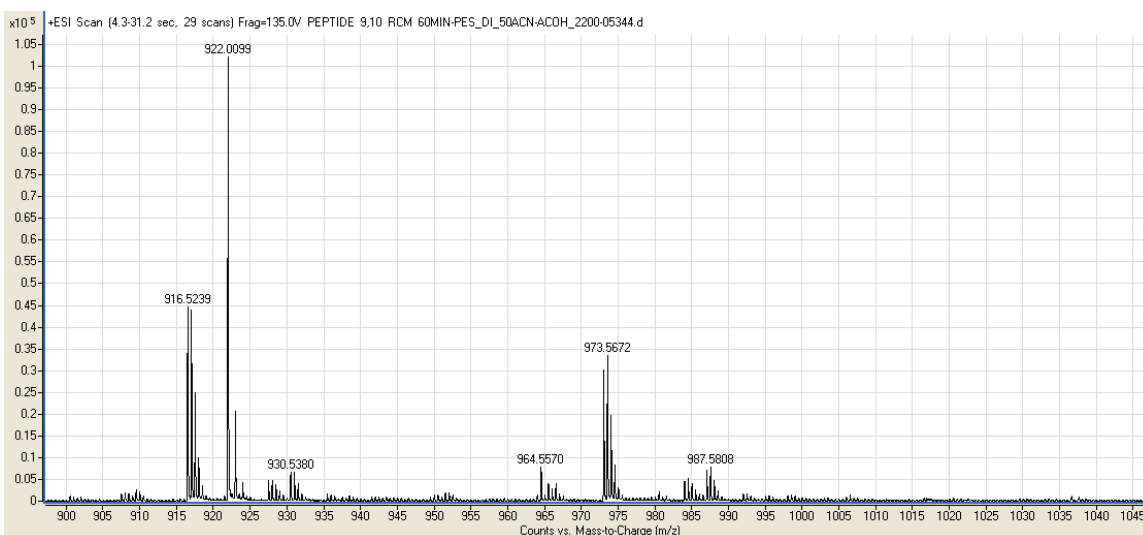

**Figure S4:** Evaluation of RCM on peptide **16** as a function of time ( $t = 60$  min). Indicated masses correspond to starting material **16** (987.5808) and product **17** (973.5672) as the  $[M+2H]^{2+}$  ion as measured by LC/MS TOF.

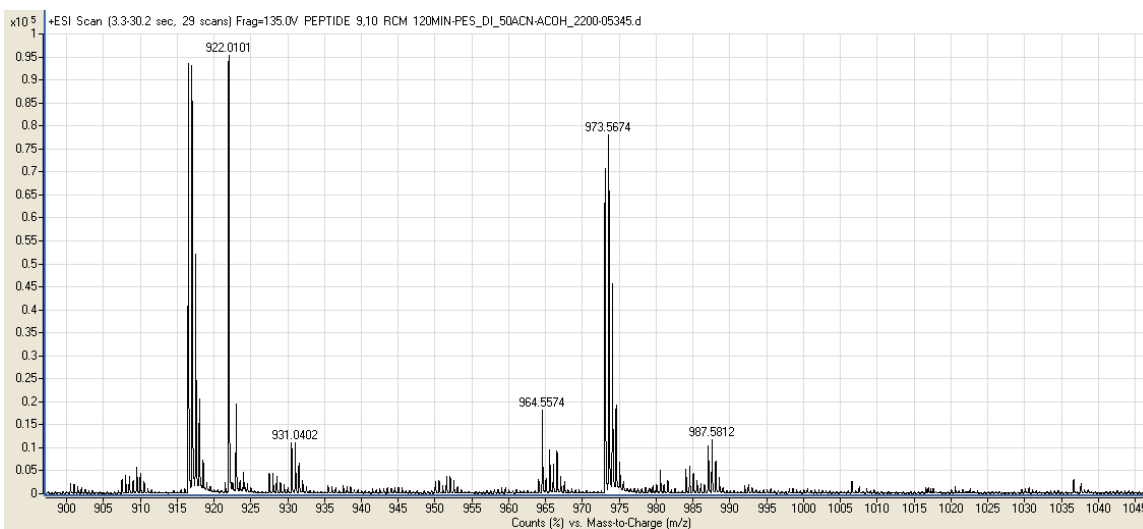

**Figure S5:** Evaluation of RCM on peptide **16** as a function of time ( $t = 120$  min). Indicated masses correspond to starting material **16** (987.5812) and product **17** (973.5674) as the  $[M+2H]^{2+}$  ion as measured by LC/MS TOF.

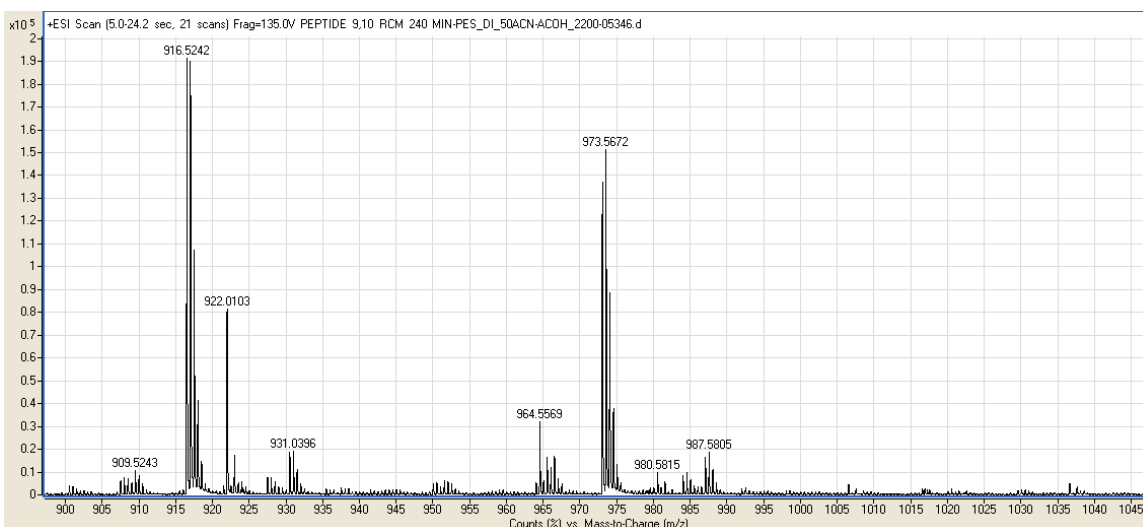

**Figure S6:** Evaluation of RCM on peptide **16** as a function of time ( $t = 240$  min). Indicated masses correspond to starting material **16** (987.5805) and product **17** (973.5672) as the  $[M+2H]^{2+}$  ion as measured by LC/MS TOF.

*HPLC chromatogram of RCM product 17*

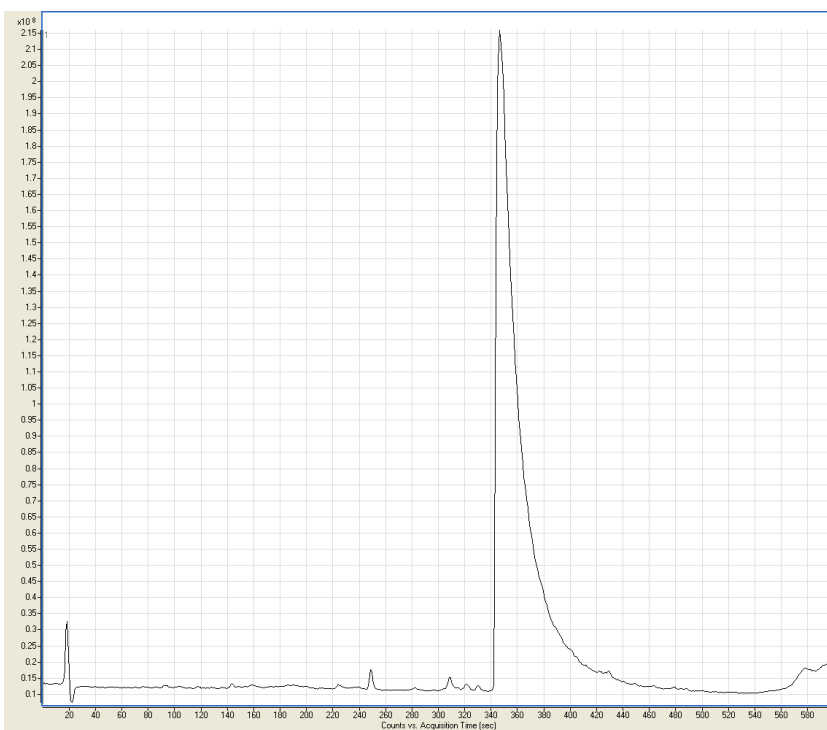

**Figure S7.** HPLC chromatogram (UV absorbance at 210 nm) of purified peptide **17** ( $R_t$  of Z-olefin macrocycle is 348 sec). Column conditions: 5–95% ACN:H<sub>2</sub>O + 0.1% AcOH.

*MALDI-TOF spectrum of purified peptide 17.*

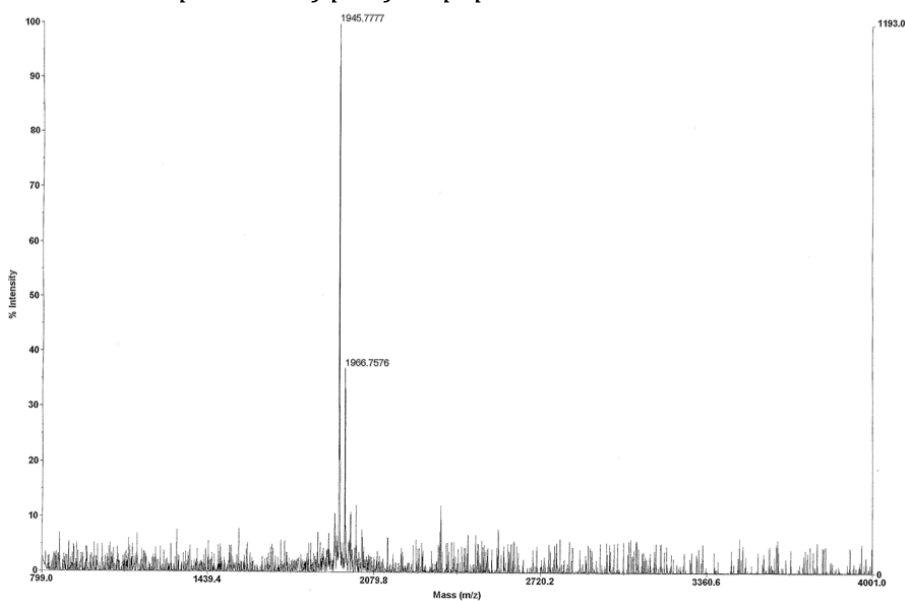

**Figure S8:** MALDI-TOF of purified peptide **17**. Indicated masses correspond to 1945.7777  $[M+H]^+$  and 1966.7576  $[M+Na]^+$  for the product of Z-selective RCM.

*Monitoring RCM on peptide 18*

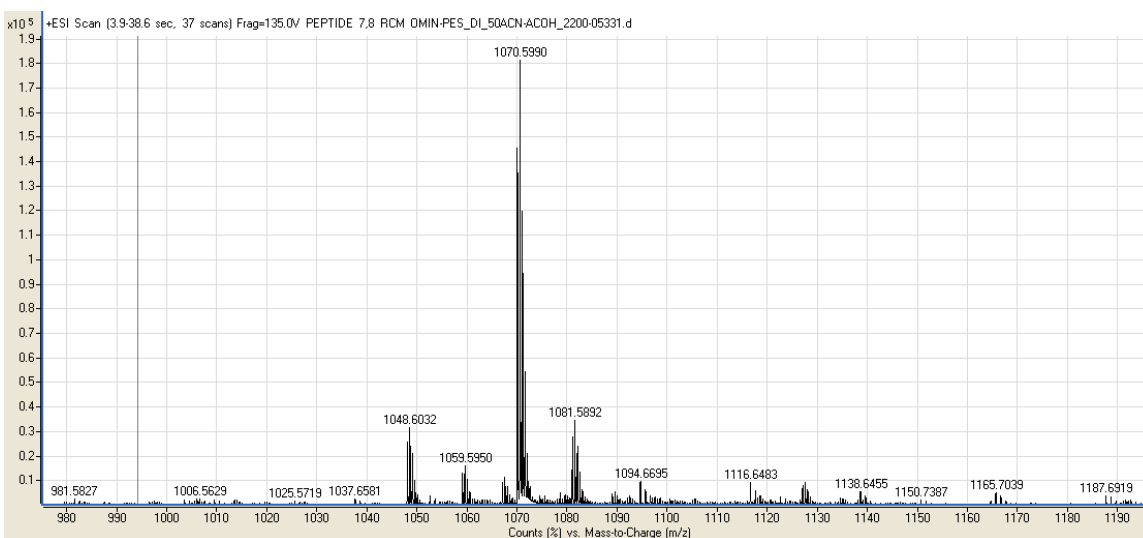

**Figure S9:** Evaluation of RCM on peptide **18** as a function of time ( $t = 0$  min). The indicated mass corresponding to starting material (1070.5990) is observed as the  $[M+2H]^{2+} + Na^+$  ion in ESI and was used to monitor the extent of conversion during the course of the reaction

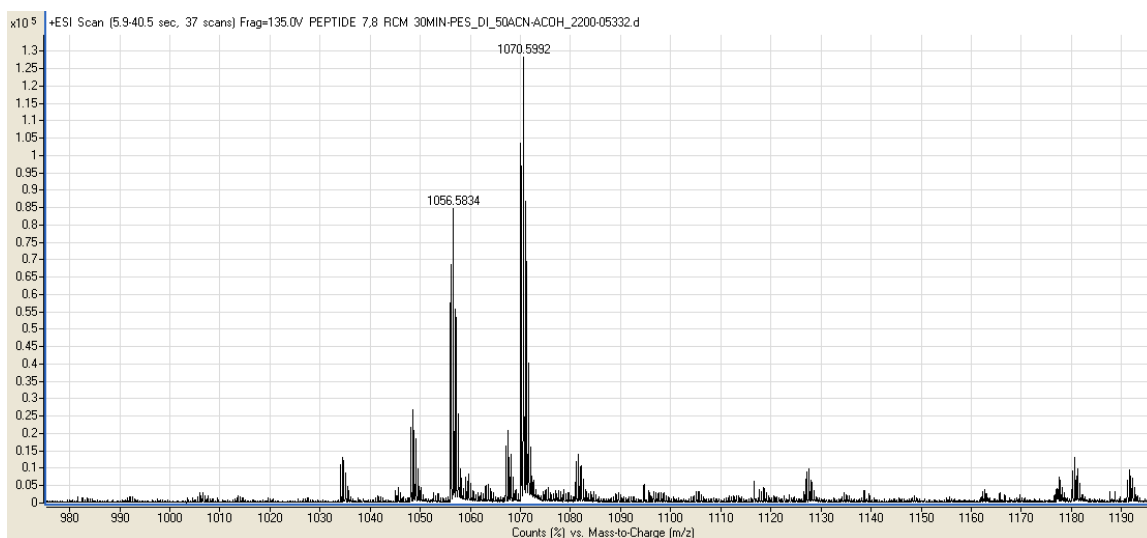

**Figure S10:** Evaluation of RCM on peptide **18** as a function of time ( $t = 30$  min). Indicated masses correspond to starting material **18** (1070.5992) and product **19** (1056.5834) as the  $[M+2H]^{2+}$  ion as measured by LC/MS TOF.

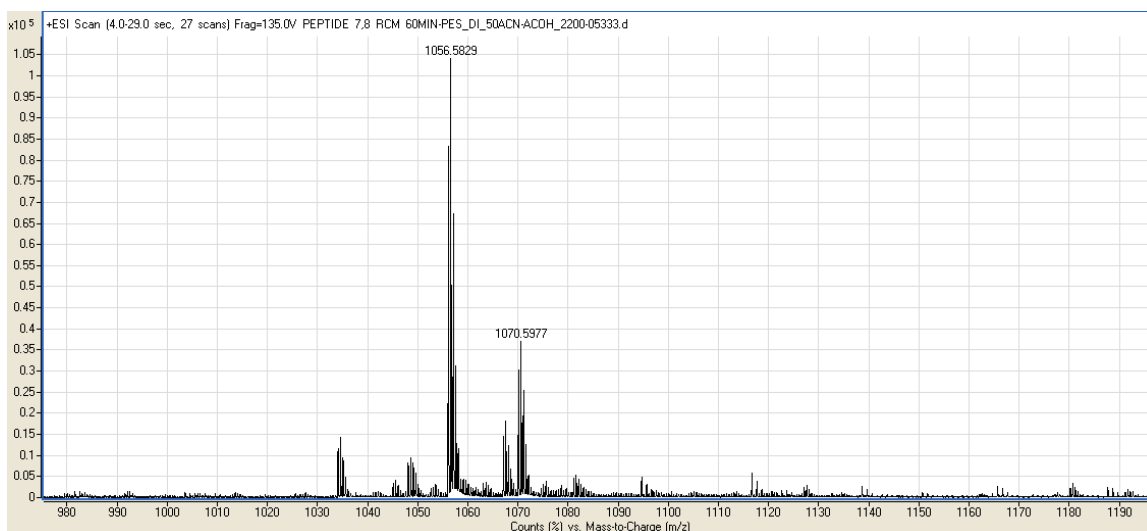

**Figure S11:** Evaluation of RCM on peptide **18** as a function of time ( $t = 60$  min). Indicated masses correspond to starting material **18** (1070.5977) and product **19** (1056.5829) as the  $[M+2H]^{2+}$  ion as measured by LC/MS TOF.

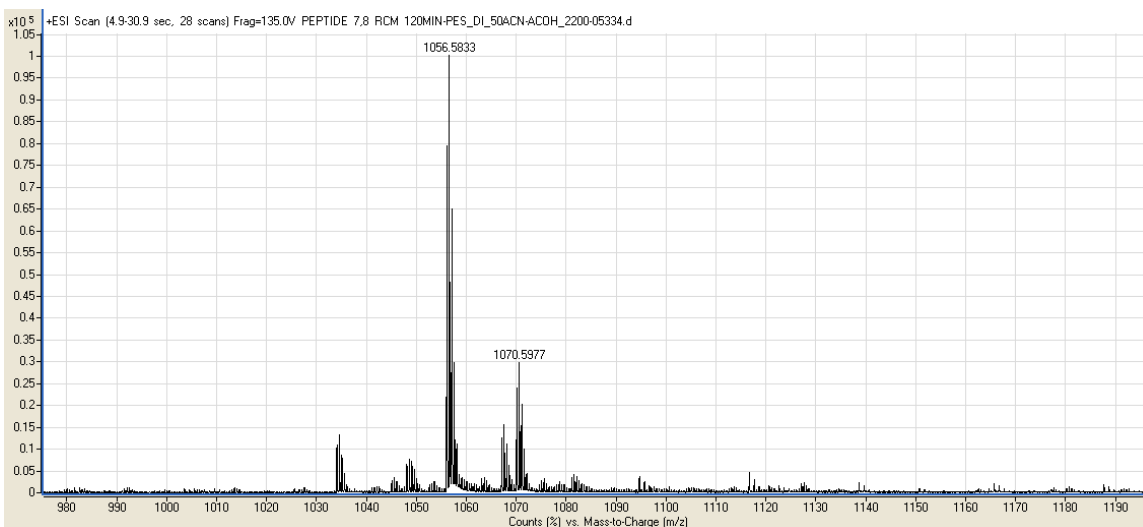

**Figure S12:** Evaluation of RCM on peptide **18** as a function of time ( $t = 120$  min). Indicated masses correspond to starting material **18** (1070.5977) and product **19** (1056.5833) as the  $[M+2H]^{2+}$  ion as measured by LC/MS TOF.

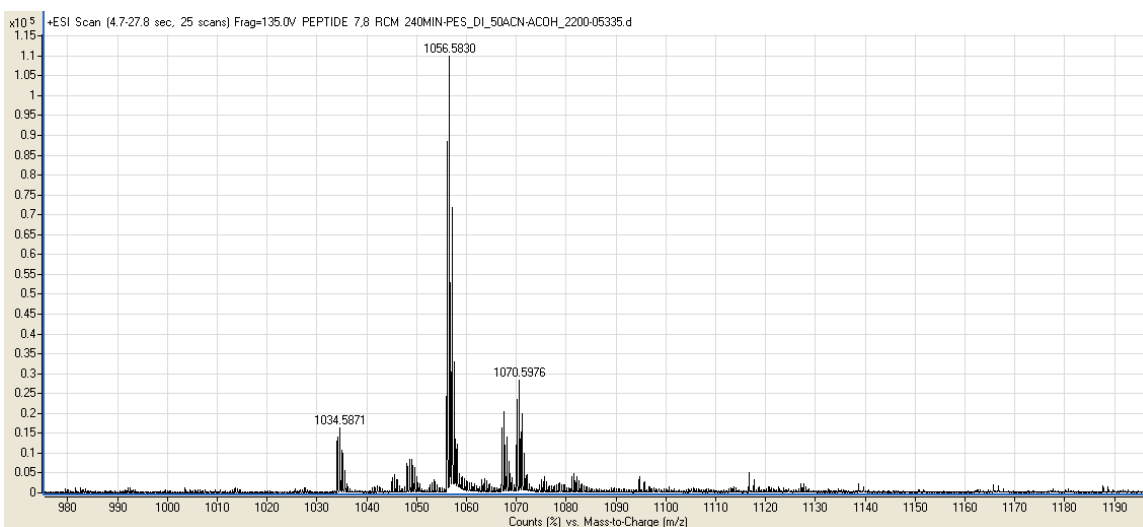

**Figure S13:** Evaluation of RCM on peptide **18** as a function of time ( $t = 240$  min). Indicated masses correspond to starting material **18** (1070.5976) and product **19** (1056.5830) as the  $[M+2H]^{2+}$  ion as measured by LC/MS TOF.

*HPLC chromatogram of RCM product 19*

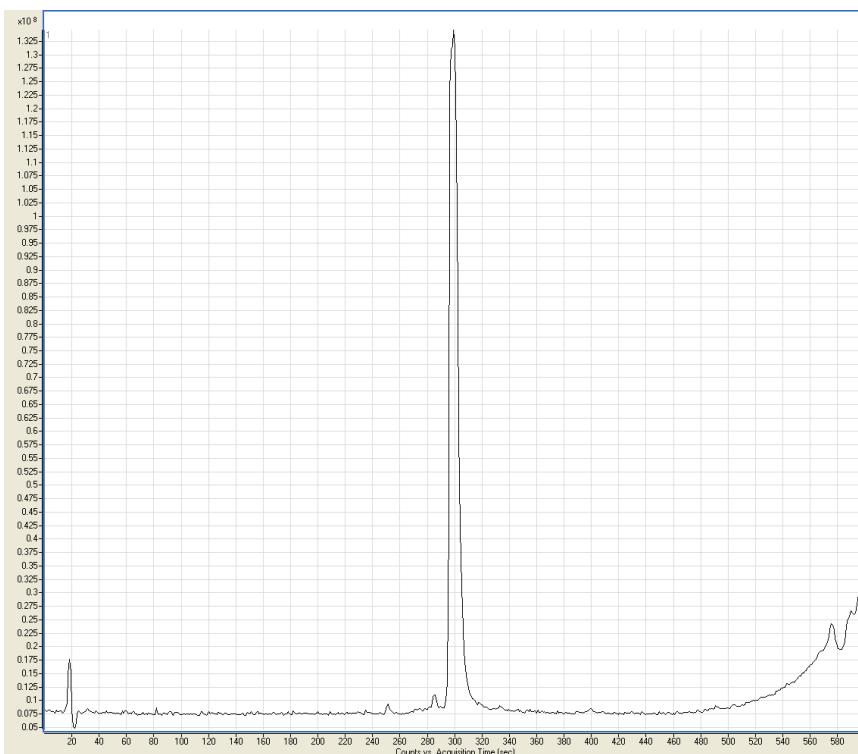

**Figure S14:** HPLC chromatogram (UV absorbance at 254 nm) of purified peptide **20** ( $R_t$  of Z-olefin macrocycle is 302 sec). Column conditions: 5–95% ACN:H<sub>2</sub>O + 0.1% AcOH.

*MALDI-TOF spectrum of purified peptide 19.*

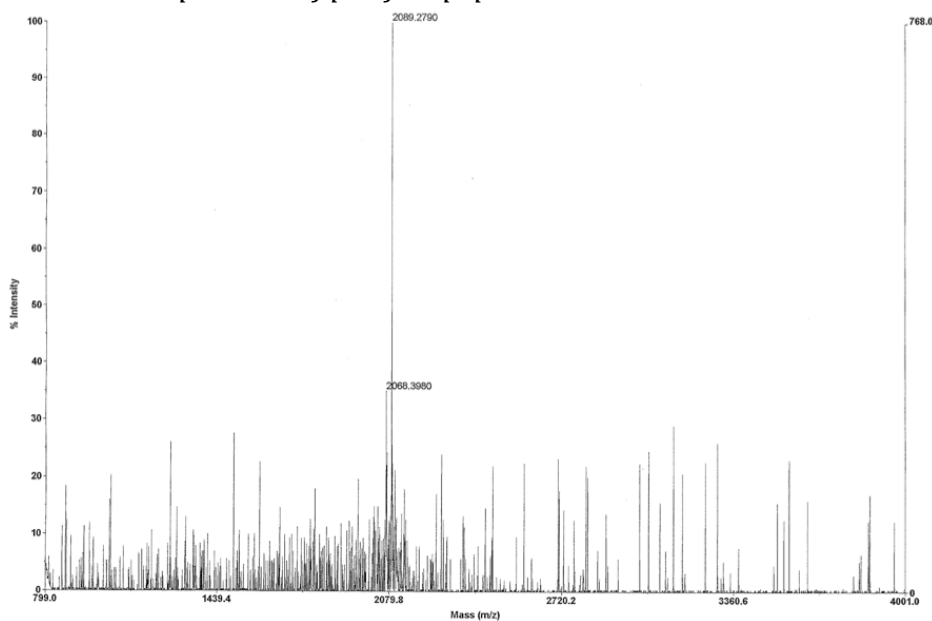

**Figure S15:** MALDI-TOF of purified peptide **19**. Indicated masses correspond to 2068.3980 [M+H]<sup>+</sup> and 2089.2790 [M+Na]<sup>+</sup> for the product of Z-selective RCM

## General procedure for RCM on Aib-containing peptides bearing i, i+3 crosslinks

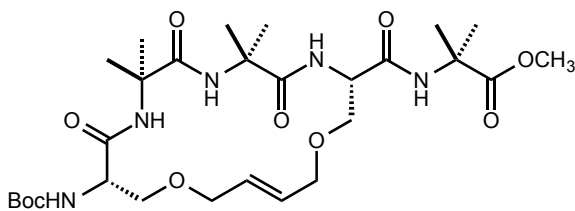

**21:** C<sub>28</sub>H<sub>47</sub>N<sub>5</sub>O<sub>10</sub>  
Exact mass: 613.3323

Boc-Ser(Allyl)-Aib-Aib-Ser(Allyl)-Aib-OMe **20**<sup>2</sup> (20.0 mg, 0.033 mmol) was dissolved in dichloroethane (6.5 mL) in a nitrogen-flushed flask. Second-generation Grubbs catalyst **22** (2.77 mg, 0.0033 mmol), Grubbs-Hoveyda catalyst **23** (2.04 mg, 0.0033 mmol), or cyclometalated ruthenium catalyst **1** (6.11 mg, 0.099 mmol) was added in a single portion and then heated at 40 °C for 4 h. At this point, a 60 µL aliquot was removed and quenched by the addition of H<sub>2</sub>O (3 mL) and 30% hydrogen peroxide (3 mL) and the biphasic mixture was vigorously stirred for 8 h. The organic layer was passed through a plug of Na<sub>2</sub>SO<sub>4</sub> and an aliquot was removed for LCMS analysis. <sup>1</sup>H NMR (400 MHz, CD<sub>2</sub>Cl<sub>2</sub>): δ 7.48 (1H, d, *J* = 7.4 Hz), 7.47 (1H, s), 6.96 (1H, s), 6.78 (1H, s), 5.74 (2H, m), 5.22 (1H, d, *J* = 7.8), 4.56 (1H, dt, *J* = 2.3, 8.7 Hz), 4.24 (1H, m), 4.16 (2H, m), 3.90 (1H, dd, *J* = 2.9, 9.3 Hz), 3.822 (2H, m), 3.76 (1H, t, *J* = 9.0 Hz), 3.65 (3H, s), 3.48 (1H, dd, *J* = 4.3, 8.7 Hz), 1.55 (3H, s), 1.50 (3H, s), 1.46 (3H, s), 1.44 (15H, s), 1.42 (3H, s). <sup>13</sup>C NMR (100 MHz, CD<sub>2</sub>Cl<sub>2</sub>): δ 175.26, 174.51, 174.46, 171.98, 169.44, 156.31, 132.33, 126.45, 81.17, 70.97, 70.23, 69.29, 66.70, 57.71, 57.45, 56.29, 55.18, 54.73, 52.42, 28.33, 27.78, 26.91, 25.23, 25.08, 23.55, 23.40. HRMS (ESI) *m/z* calcd for C<sub>28</sub>H<sub>48</sub>N<sub>5</sub>O<sub>10</sub> [M+H]<sup>+</sup>: 614.3521, found 614.3533

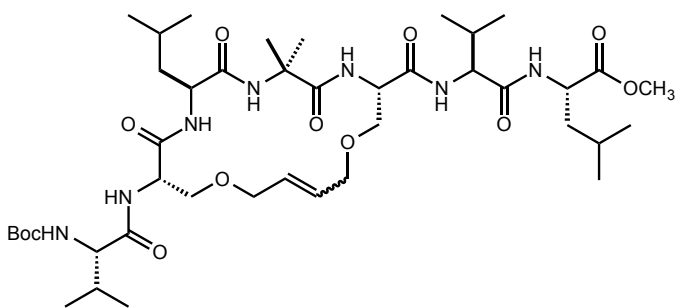

**25:** C<sub>42</sub>H<sub>73</sub>N<sub>7</sub>O<sub>12</sub>  
Exact mass: 867.5300

Following the procedure for RCM on peptide **21**, Boc-Val-L-Ser(Al)-Leu-Aib-L-Ser(Al)-Val-Leu-OMe **24**<sup>2</sup> (9.1 mg, mmol) was dissolved in DCM (1.9 mL) under a stream of nitrogen. To this was added catalysts **22**, **23**, or **1** (10 mol%) and the reaction heated at 40 °C for 4 h. The reaction was diluted with DCM (4 mL) and quenched by addition of water (2 mL) and 30% hydrogen peroxide (2 mL). The biphasic mixture was vigorously stirred for 4 h. An aliquot of the organic layer (60 µL) was removed for LCMS analysis. HRMS (FAB) *m/z* calcd for C<sub>42</sub>H<sub>48</sub>N<sub>5</sub>O<sub>10</sub> [M+Na]<sup>+</sup>: 890.5209, found 890.5180

<sup>2</sup> For full characterization of this compound and its ring-closed form, see: Boal, A.K. et al. *J. Am. Chem. Soc.* **2007**, *129*, 6986–6987.



*LCMS chromatogram of RCM product 21 in the presence of catalyst 1*

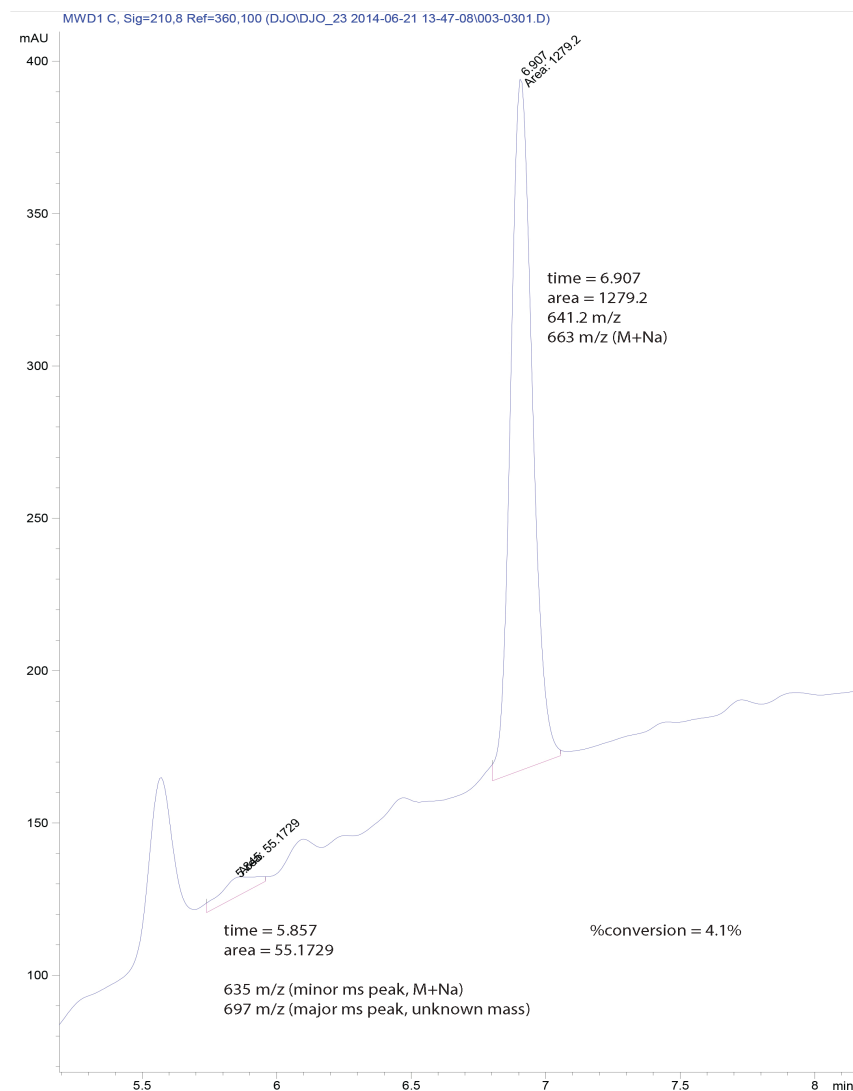

**Figure S16:** Evaluation of RCM on Boc-Ser(Allyl)-Aib-Aib-Ser(Allyl)-Aib-OMe **20** using catalyst **1**. Indicated masses correspond to starting material (663.2 M + Na) (R<sub>t</sub> of starting material is 6.91 min) and product **21** (635 M + Na) (R<sub>t</sub> of macrocycle is 5.86 min). Column conditions: 25–100% ACN:H<sub>2</sub>O + 0.1% TFA.

LCMS chromatogram of RCM product **21** in the presence of catalyst **22**

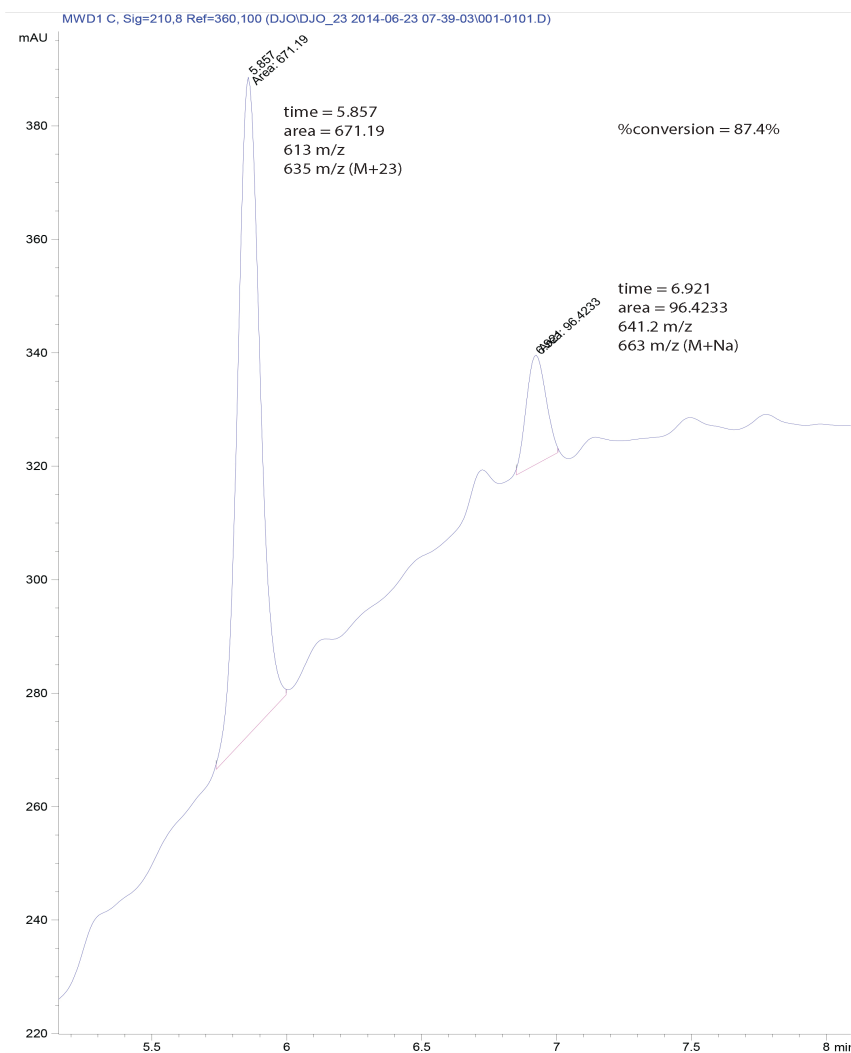

**Figure S17:** Evaluation of RCM on Boc-Ser(Allyl)-Aib-Aib-Ser(Allyl)-Aib-OMe **20** using catalyst **22**. Indicated masses correspond to starting material (663.2 M + Na) ( $R_t$  of starting material is 6.92 min) and product **21** (635 M + Na) ( $R_t$  of macrocycle is 5.86 min). Column conditions: 25–100% ACN:H<sub>2</sub>O + 0.1% TFA.

*LCMS chromatogram of RCM product 21 in the presence of catalyst 23*

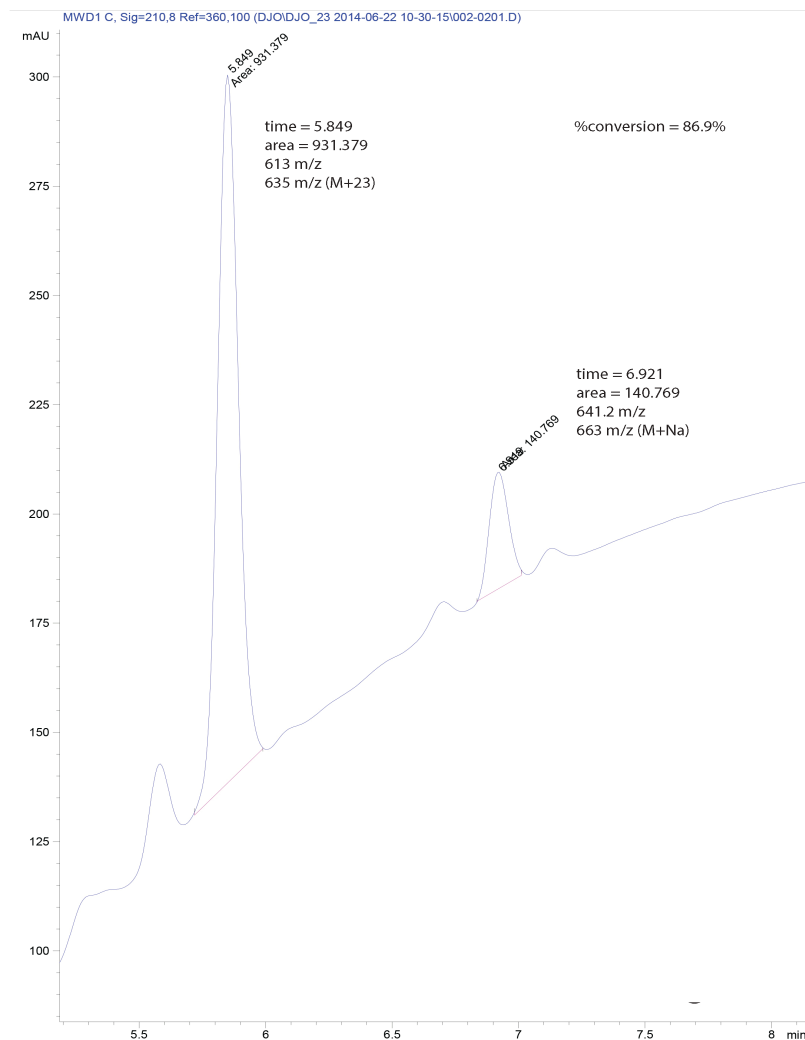

**Figure S18:** Evaluation of RCM on Boc-Ser(Allyl)-Aib-Aib-Ser(Allyl)-Aib-OMe **20** using catalyst **23**. Indicated masses correspond to starting material (663.2 M + Na) ( $R_t$  of starting material is 6.92 min) and product **21** (635 M + Na) ( $R_t$  of macrocycle is 5.85 min). Column conditions: 25–100% ACN:H<sub>2</sub>O + 0.1% TFA.

*LCMS chromatogram of RCM product 25 in the presence of catalyst 1*

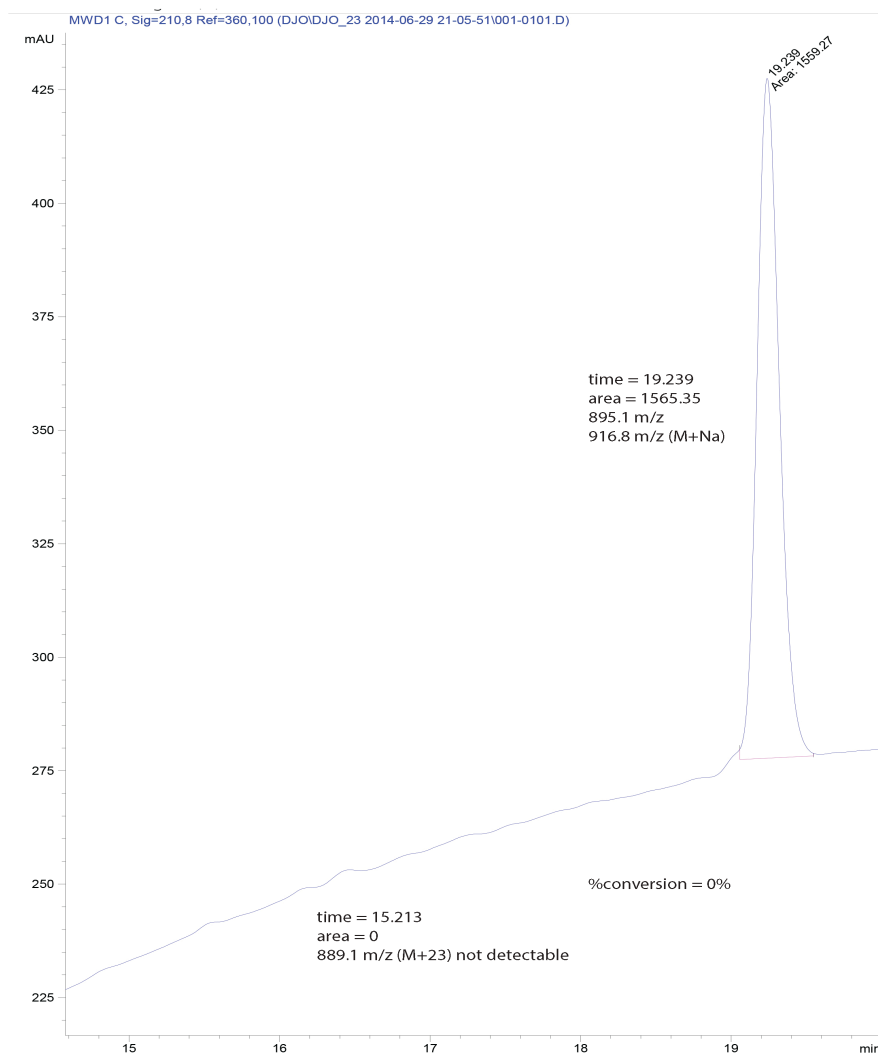

**Figure S19:** Evaluation of RCM on Boc-Val-Ser(Allyl)-Leu-Aib-Ser(Allyl)-Val-Leu-OMe **24** using catalyst **1**. Indicated masses correspond to starting material (916.8 M + Na) ( $R_t$  of starting material is 19.24 min). Column conditions: 25–100% ACN:H<sub>2</sub>O + 0.1% TFA.

LCMS chromatogram of RCM product **25** in the presence of catalyst **22**

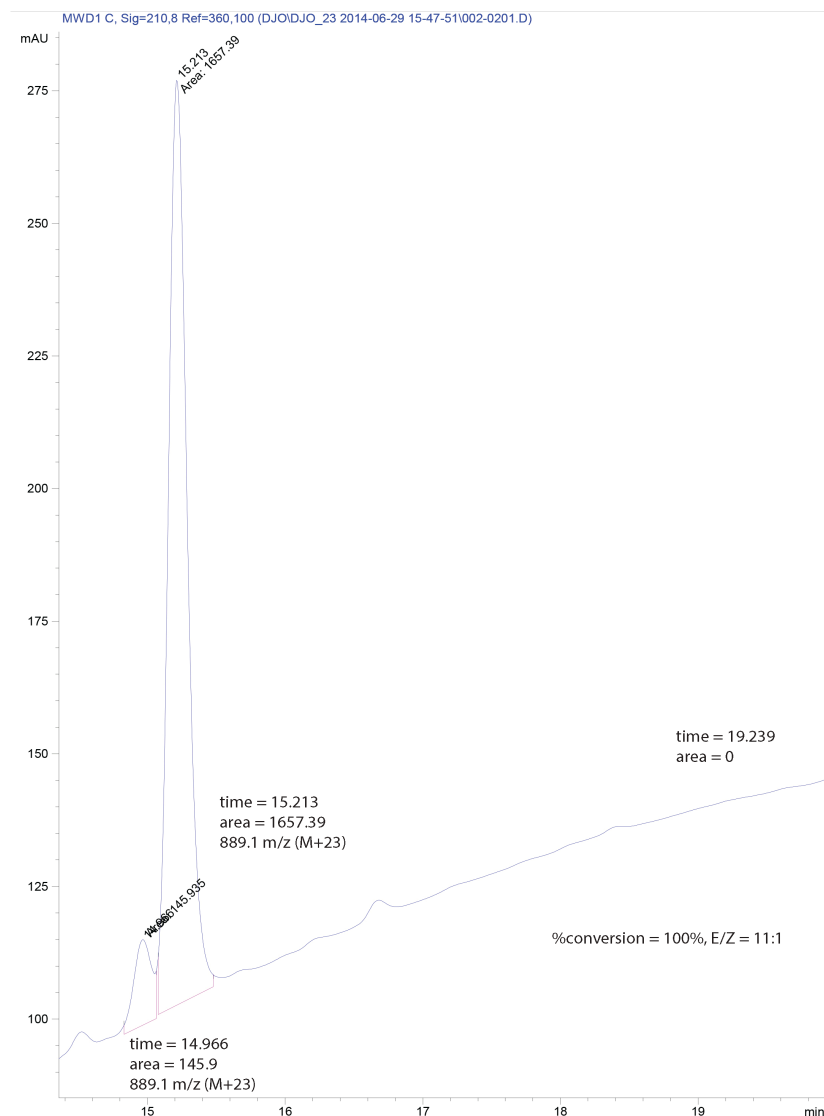

**Figure S20:** Evaluation of RCM on Boc-Val-Ser(Allyl)-Leu-Aib-Ser(Allyl)-Val-Leu-OMe **24** using catalyst **22**. Indicated masses correspond to starting material (916.8 M + Na) ( $R_t$  of starting material is 19.24 min) and product **25** (889.1 M + Na) ( $R_t$  of Z-olefin macrocycle is 14.96 min and E-macrocycle 15.21 min). Column conditions: 25–100% ACN:H<sub>2</sub>O + 0.1% TFA.

*LCMS chromatogram of RCM product 25 in the presence of catalyst 23*

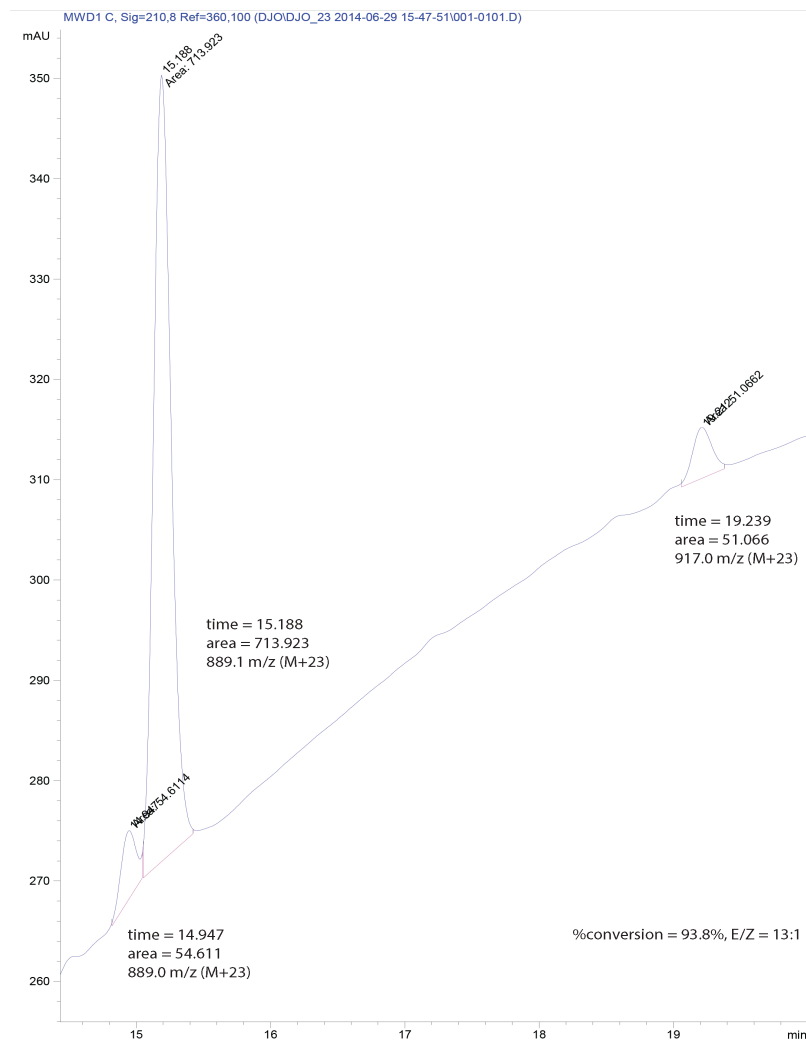

**Figure S21:** Evaluation of RCM on Boc-Val-Ser(Allyl)-Leu-Aib-Ser(Allyl)-Val-Leu-OMe **24** using catalyst **23**. Indicated masses correspond to starting material (917.0 M + Na) ( $R_t$  of starting material is 19.24 min) and product **25** (889.0 M + Na) ( $R_t$  of *Z*-olefin macrocycle is 14.95 min and *E*-macrocycle 15.19 min). Column conditions: 25–100% ACN:H<sub>2</sub>O + 0.1% TFA.

**NMR Spectra:**  $^1\text{H}$  NMR (500 MHz,  $\text{CDCl}_3$ ) spectrum of compound **3**

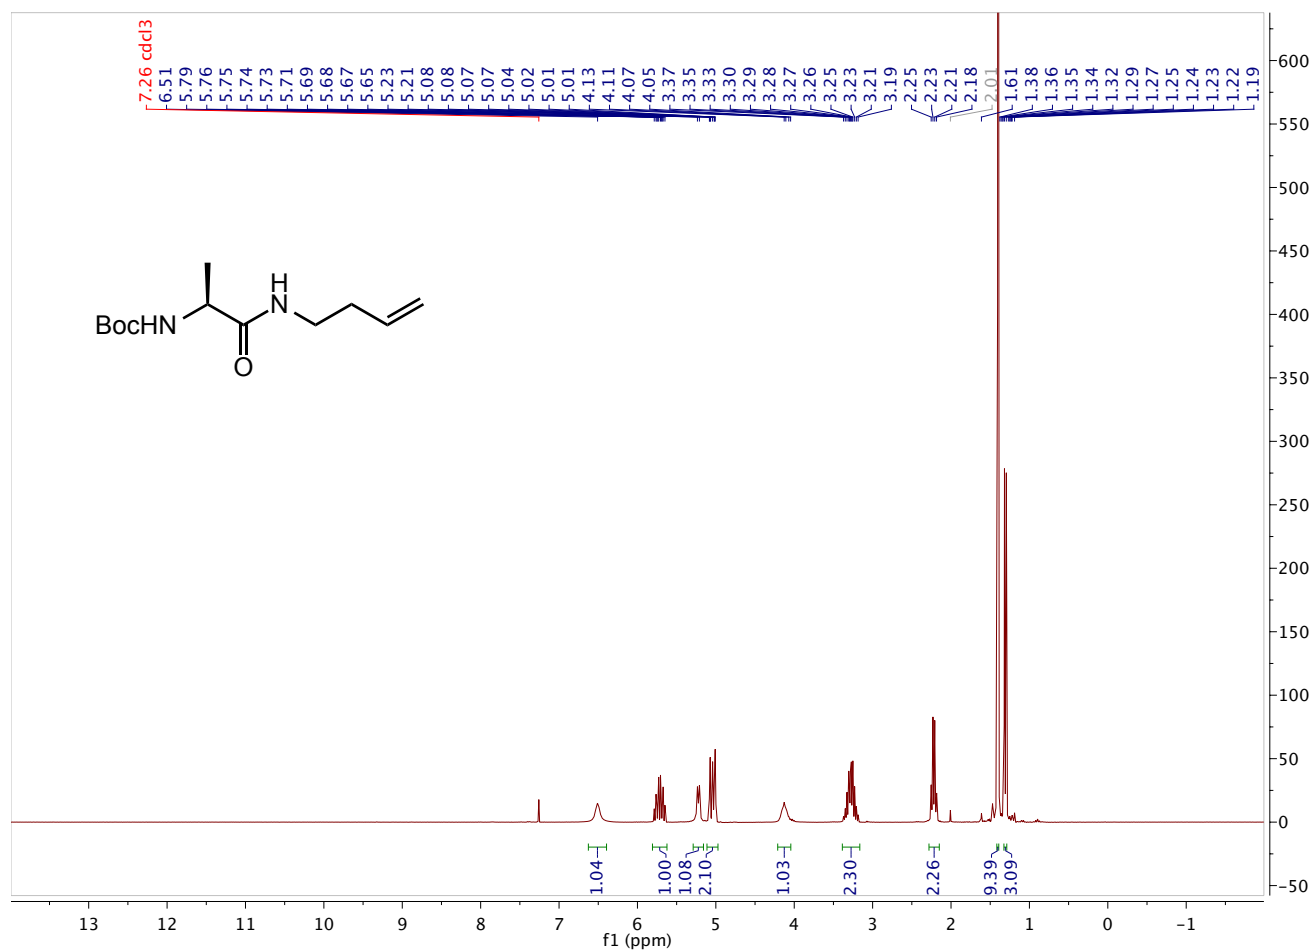

<sup>13</sup>C NMR (126 MHz, CDCl<sub>3</sub>) spectrum of compound **3**

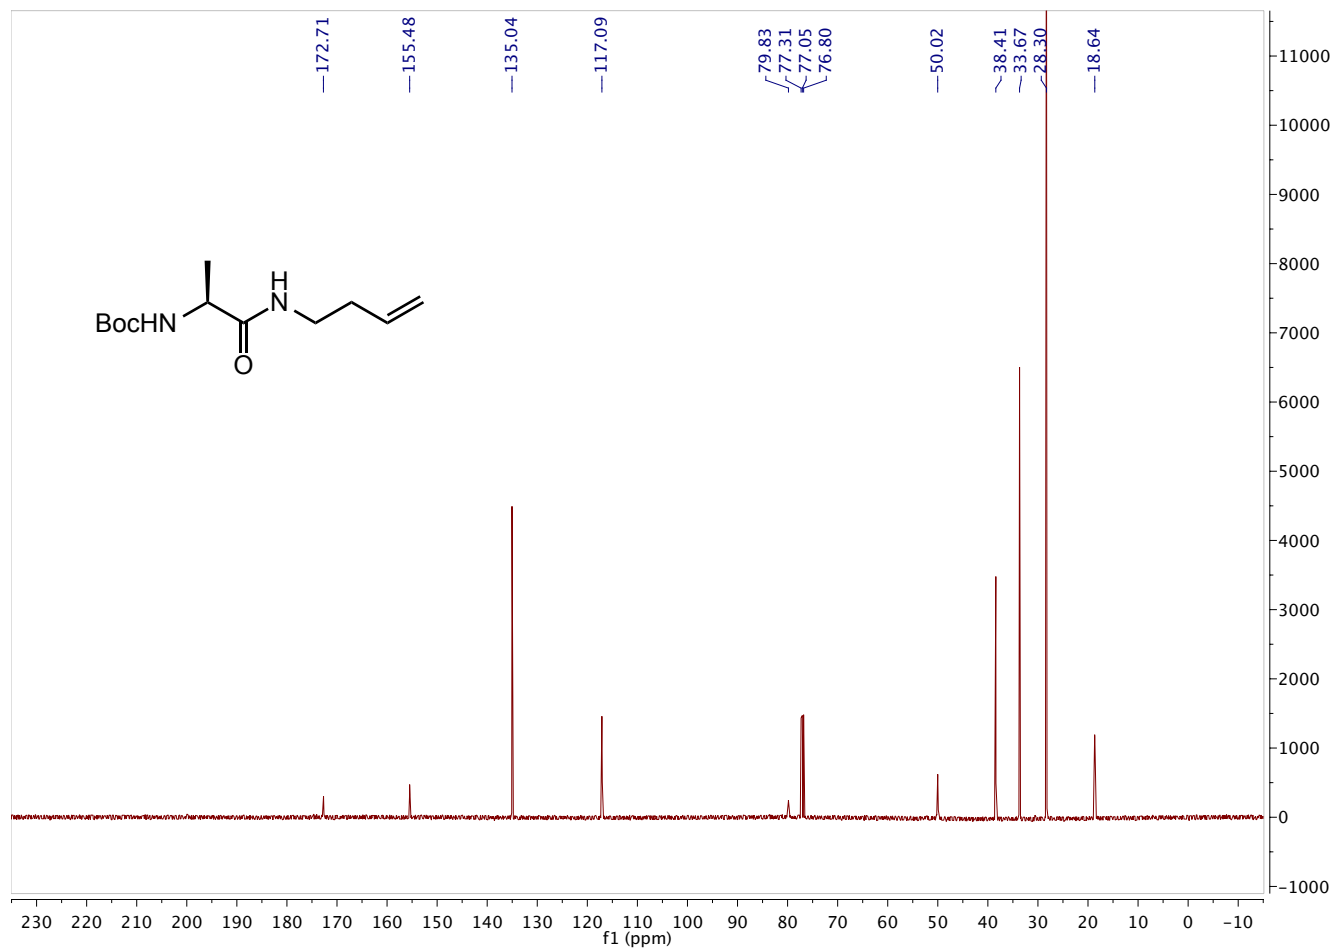



<sup>1</sup>H NMR (500 MHz, CDCl<sub>3</sub>) spectrum of compound **5a**

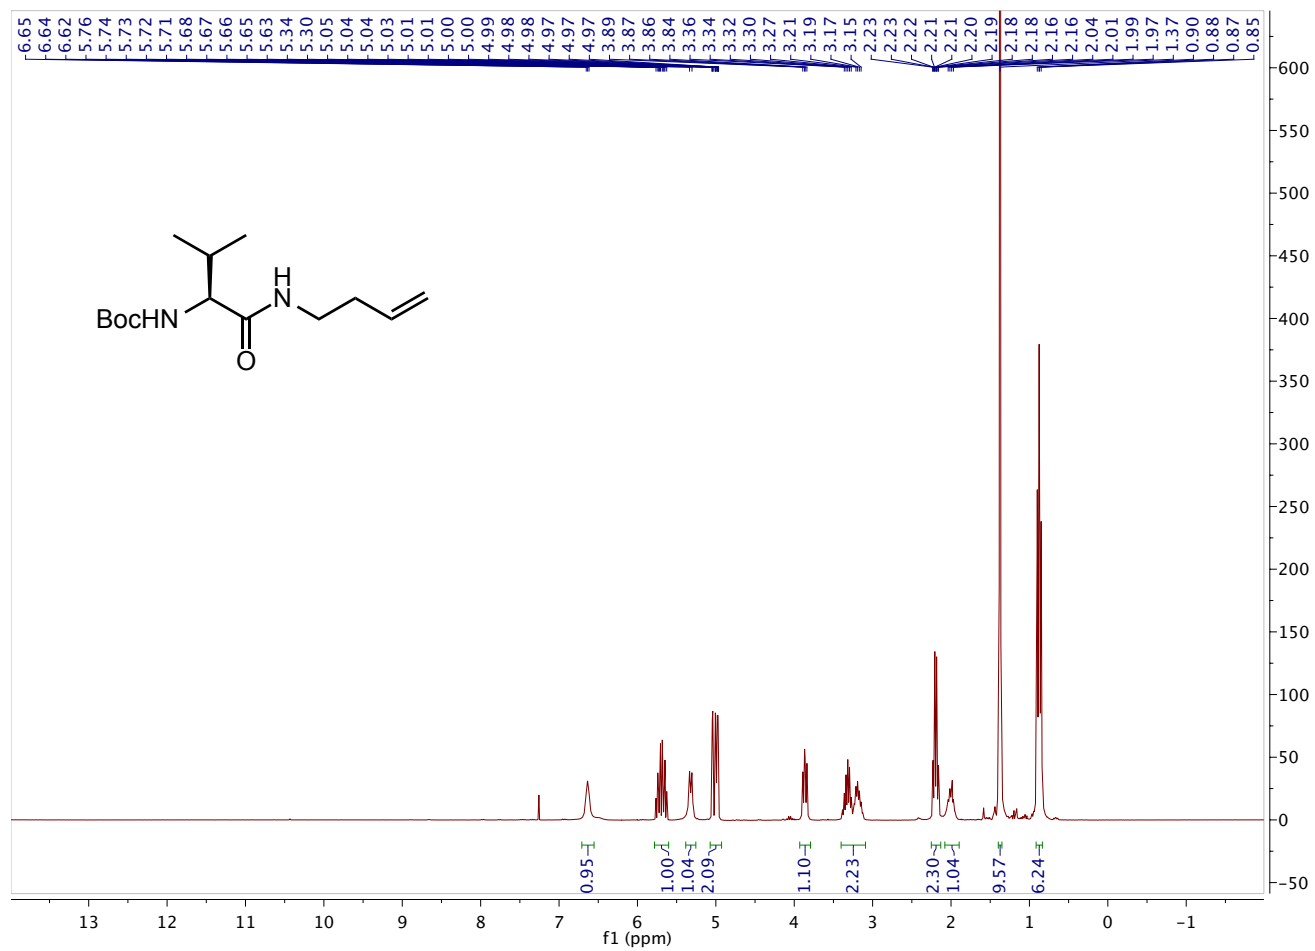

$^{13}\text{C}$  NMR (126 MHz,  $\text{CDCl}_3$ ) spectrum of compound **5a**

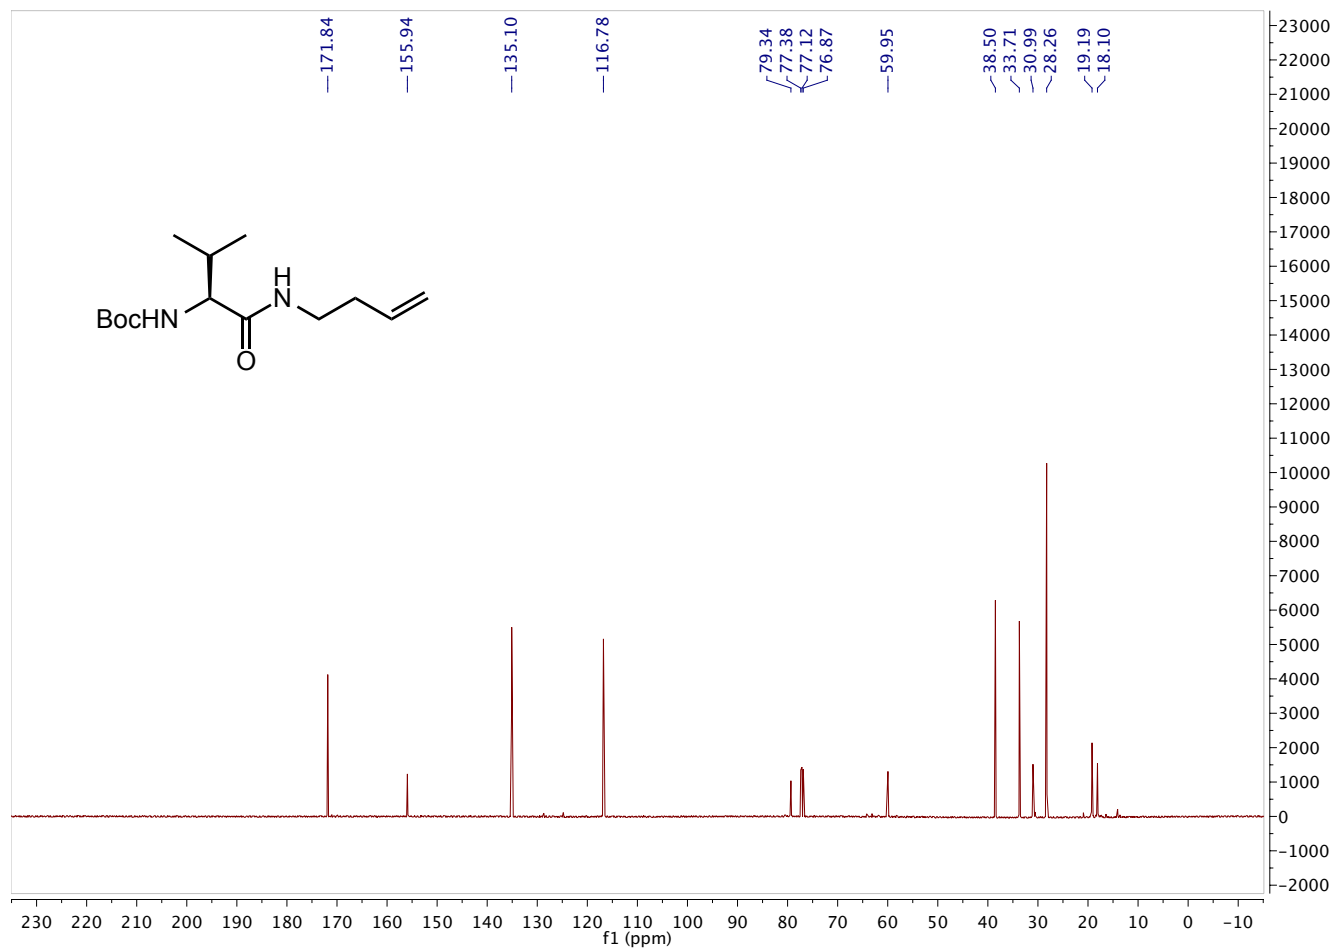

$^1\text{H}$  NMR (500 MHz,  $\text{CDCl}_3$ ) spectrum of compound **5b**

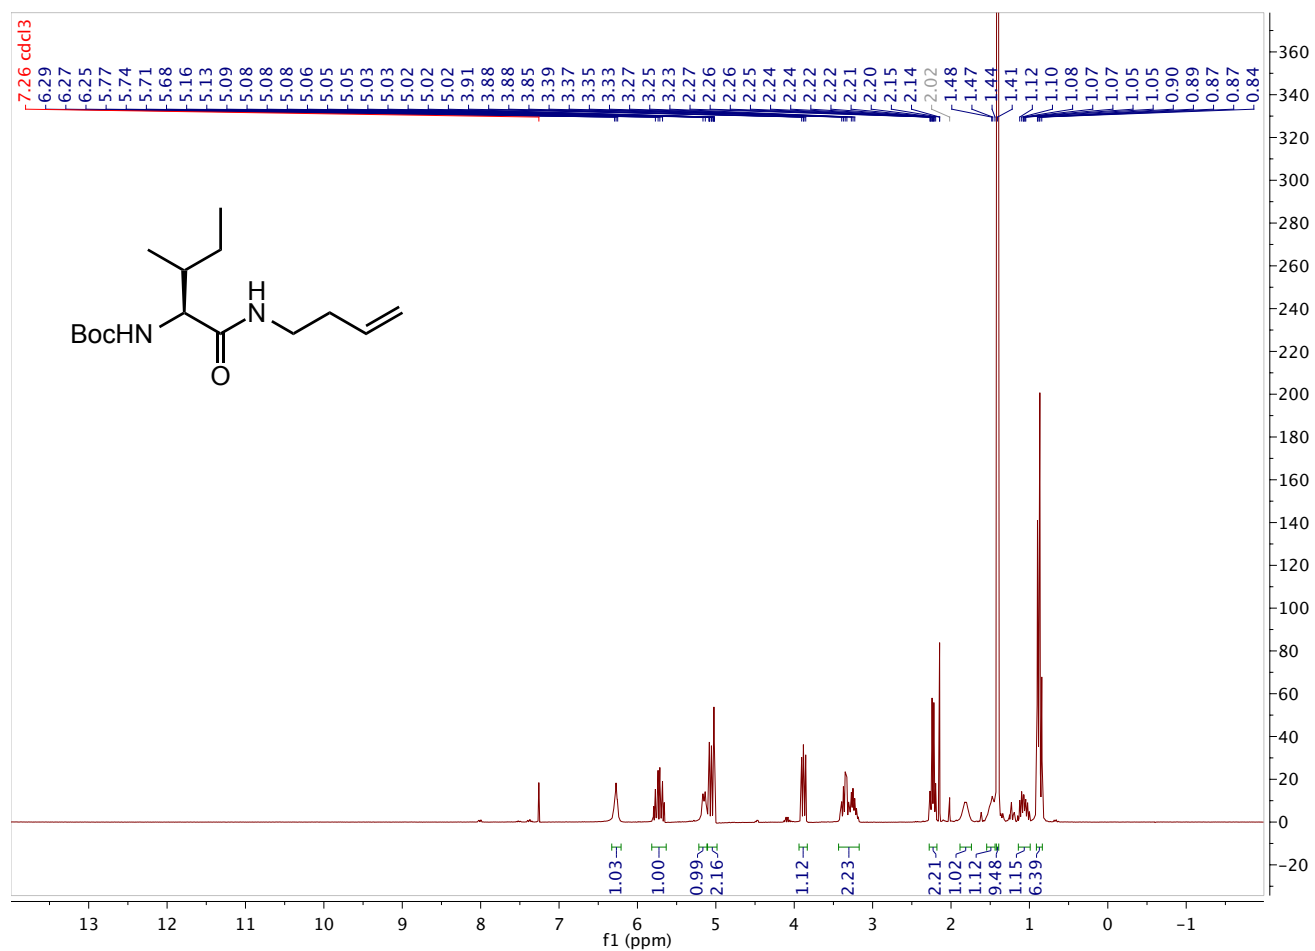

$^{13}\text{C}$  NMR (126 MHz,  $\text{CDCl}_3$ ) spectrum of compound **5b**

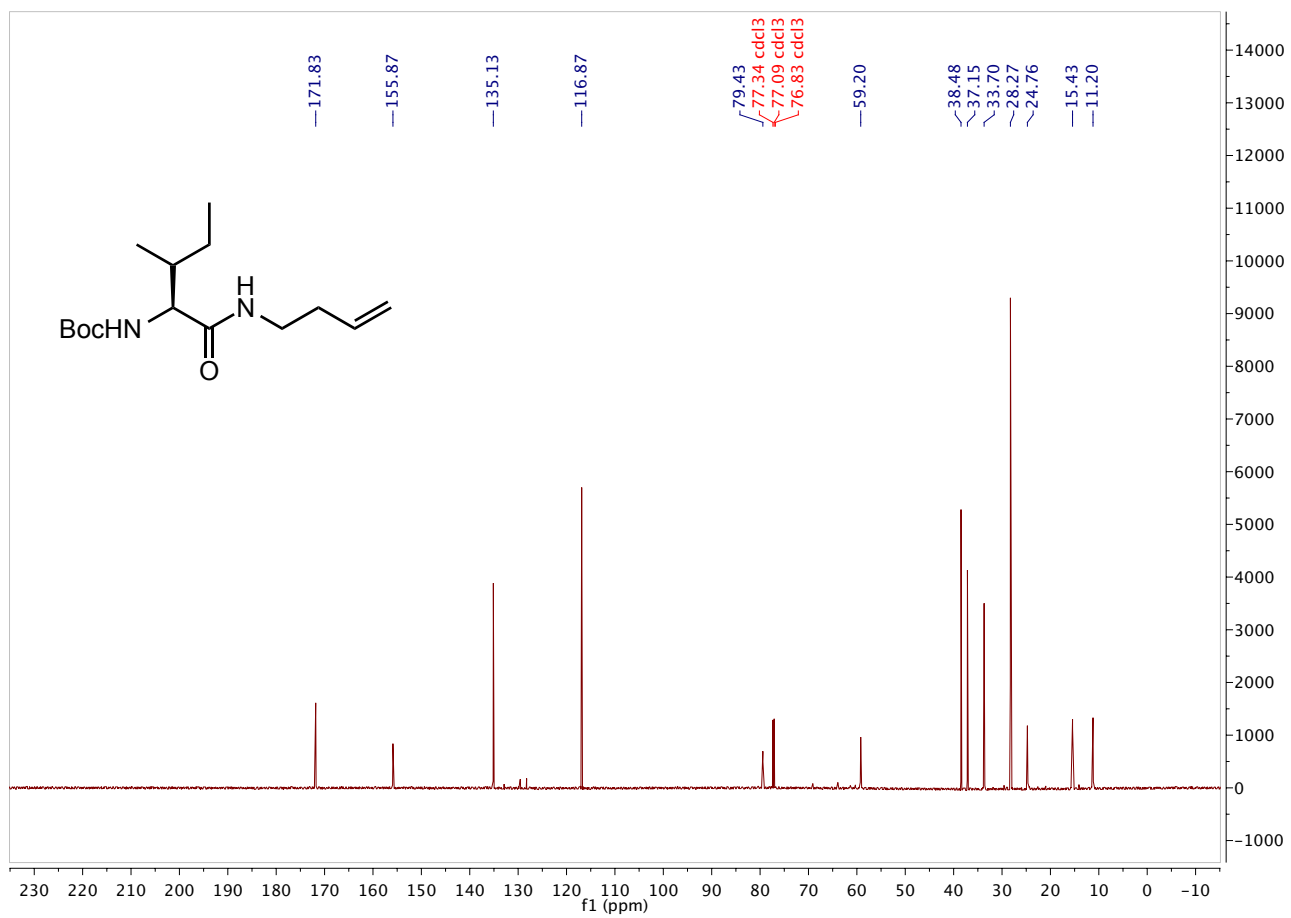

$^1\text{H}$  NMR (500 MHz,  $\text{CDCl}_3$ ) spectrum of compound **5c**

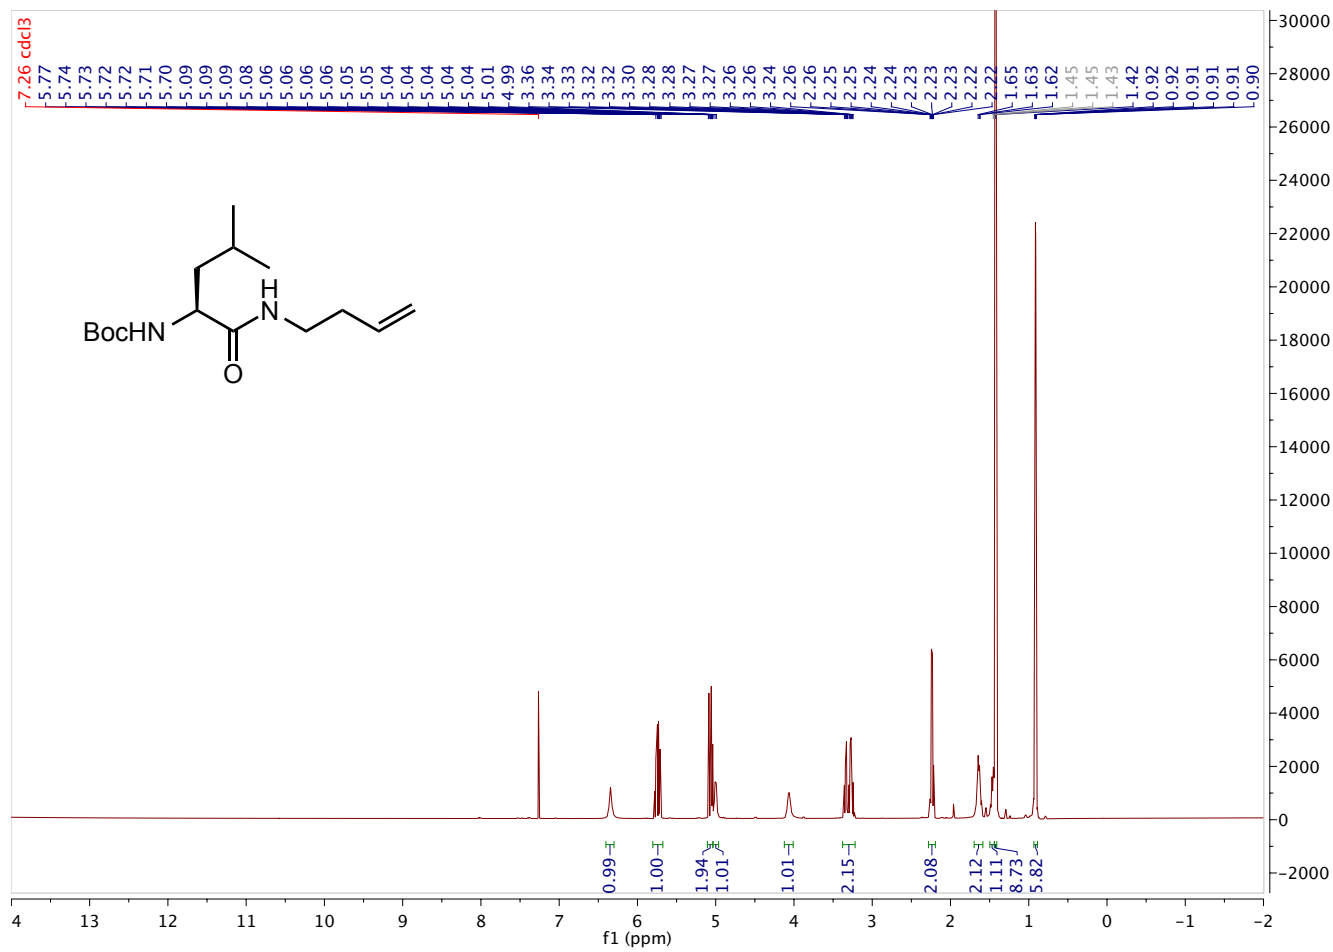

$^{13}\text{C}$  NMR (126 MHz,  $\text{CDCl}_3$ ) spectrum of compound **5c**

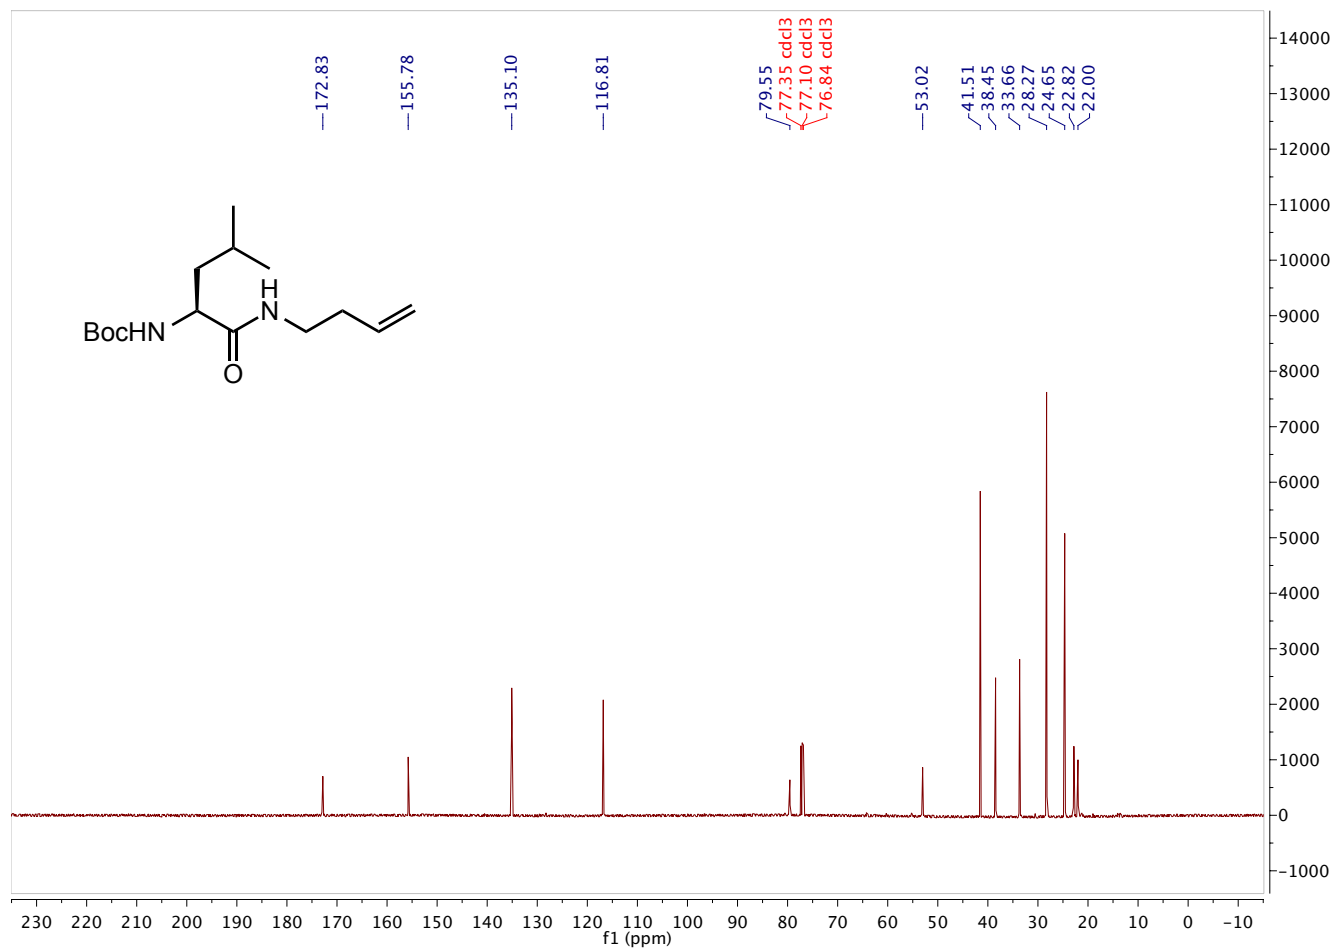

<sup>1</sup>H NMR (500 MHz, CDCl<sub>3</sub>) spectrum of compound **5d**

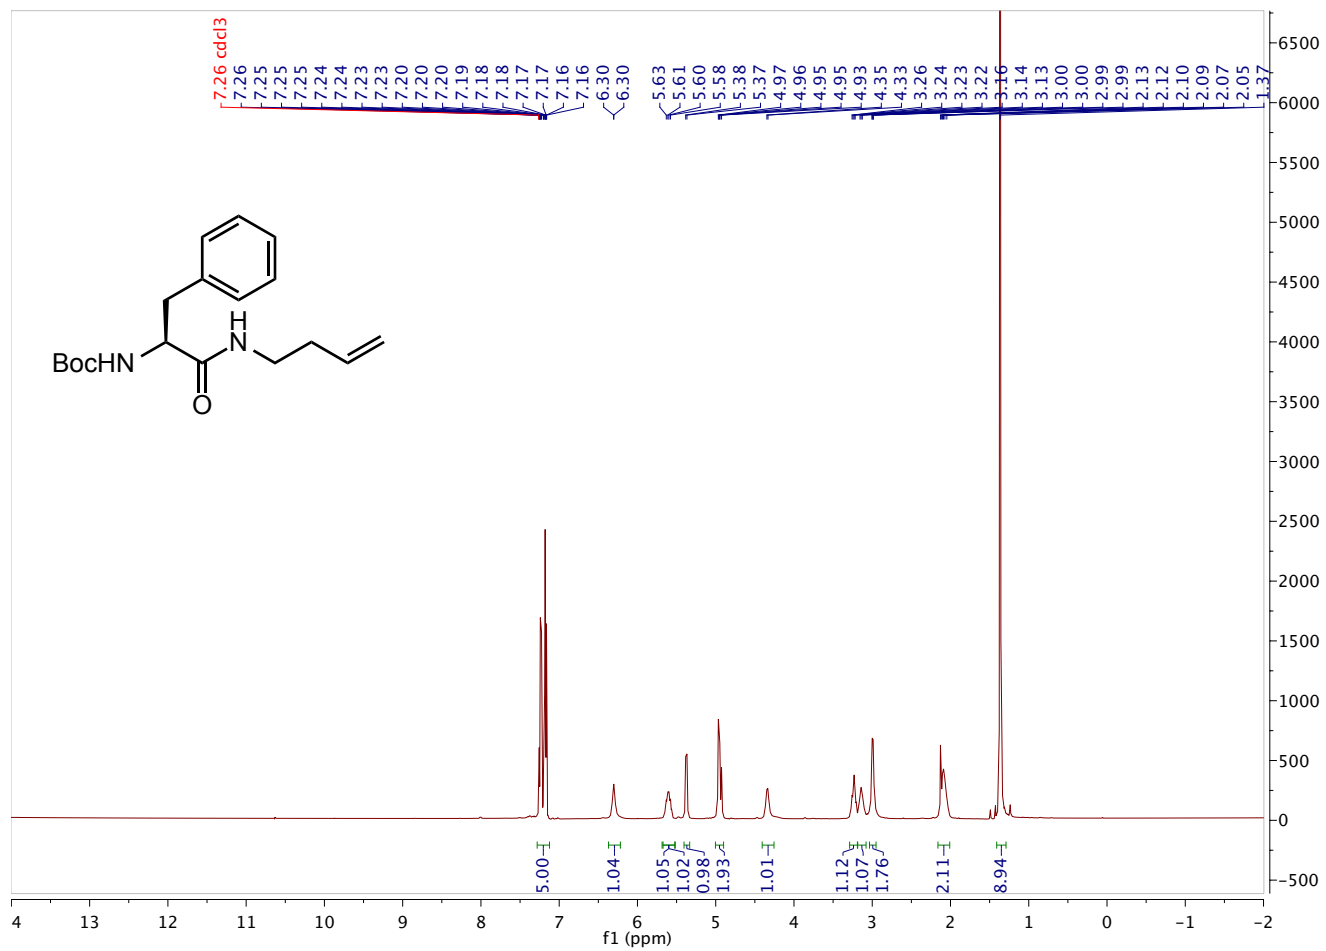

$^{13}\text{C}$  NMR (126 MHz,  $\text{CDCl}_3$ ) spectrum of compound **5d**

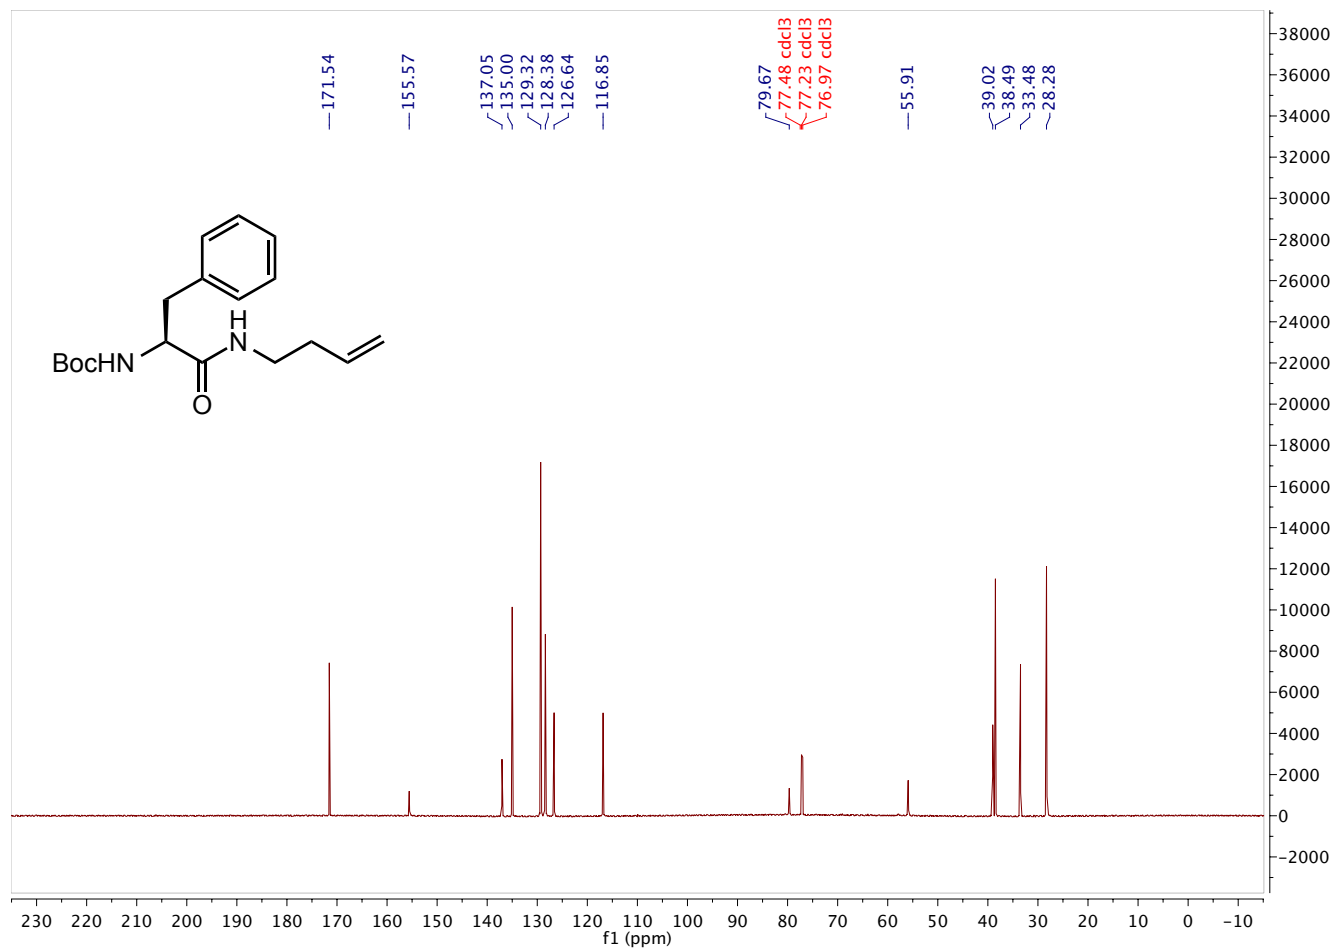



$^1\text{H}$  NMR (500 MHz,  $\text{CDCl}_3$ ) spectrum of compound **5e**

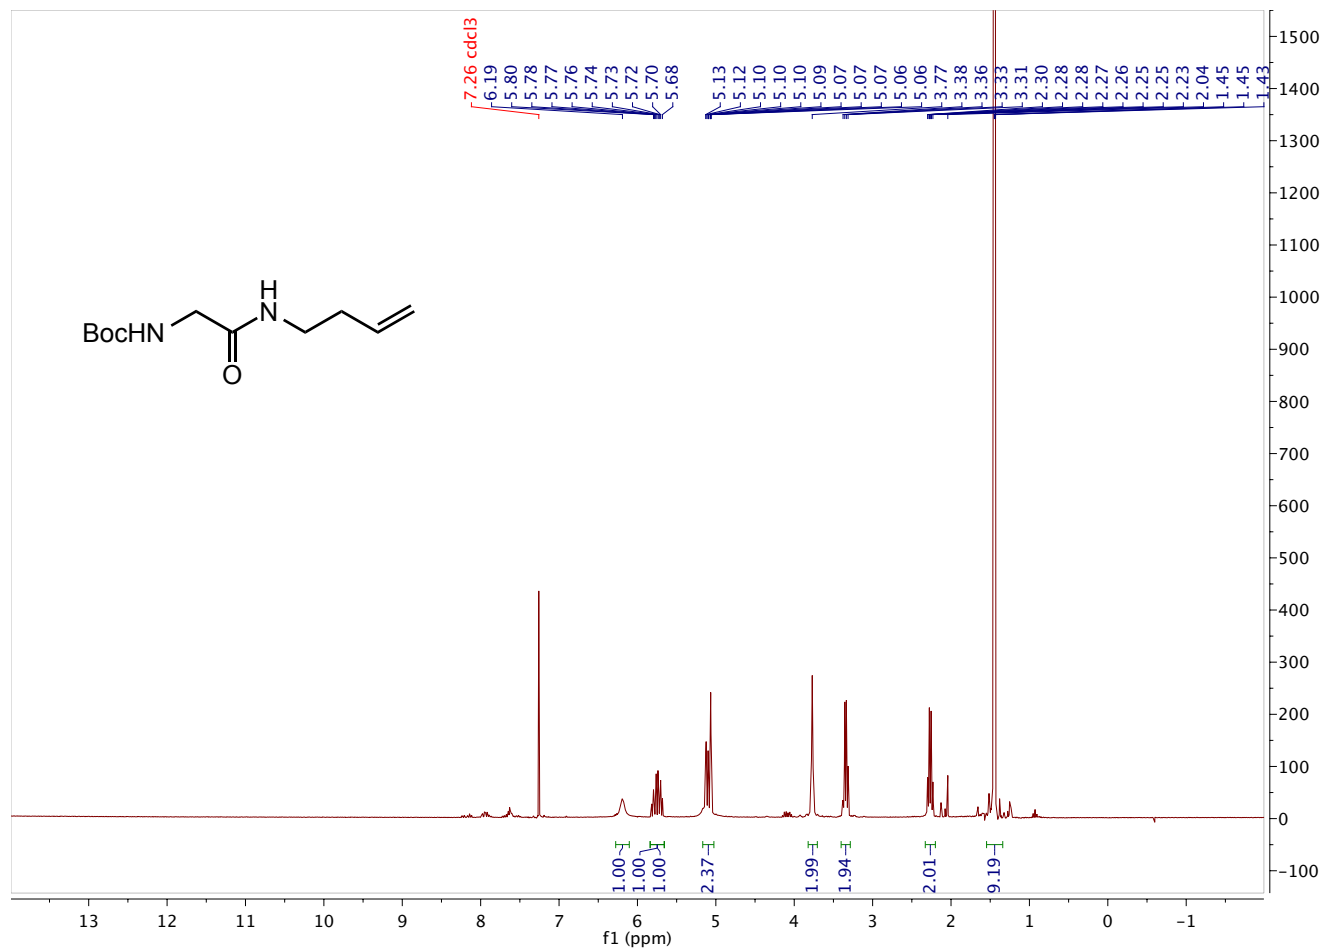

$^{13}\text{C}$  NMR (126 MHz,  $\text{CDCl}_3$ ) spectrum of compound **5e**

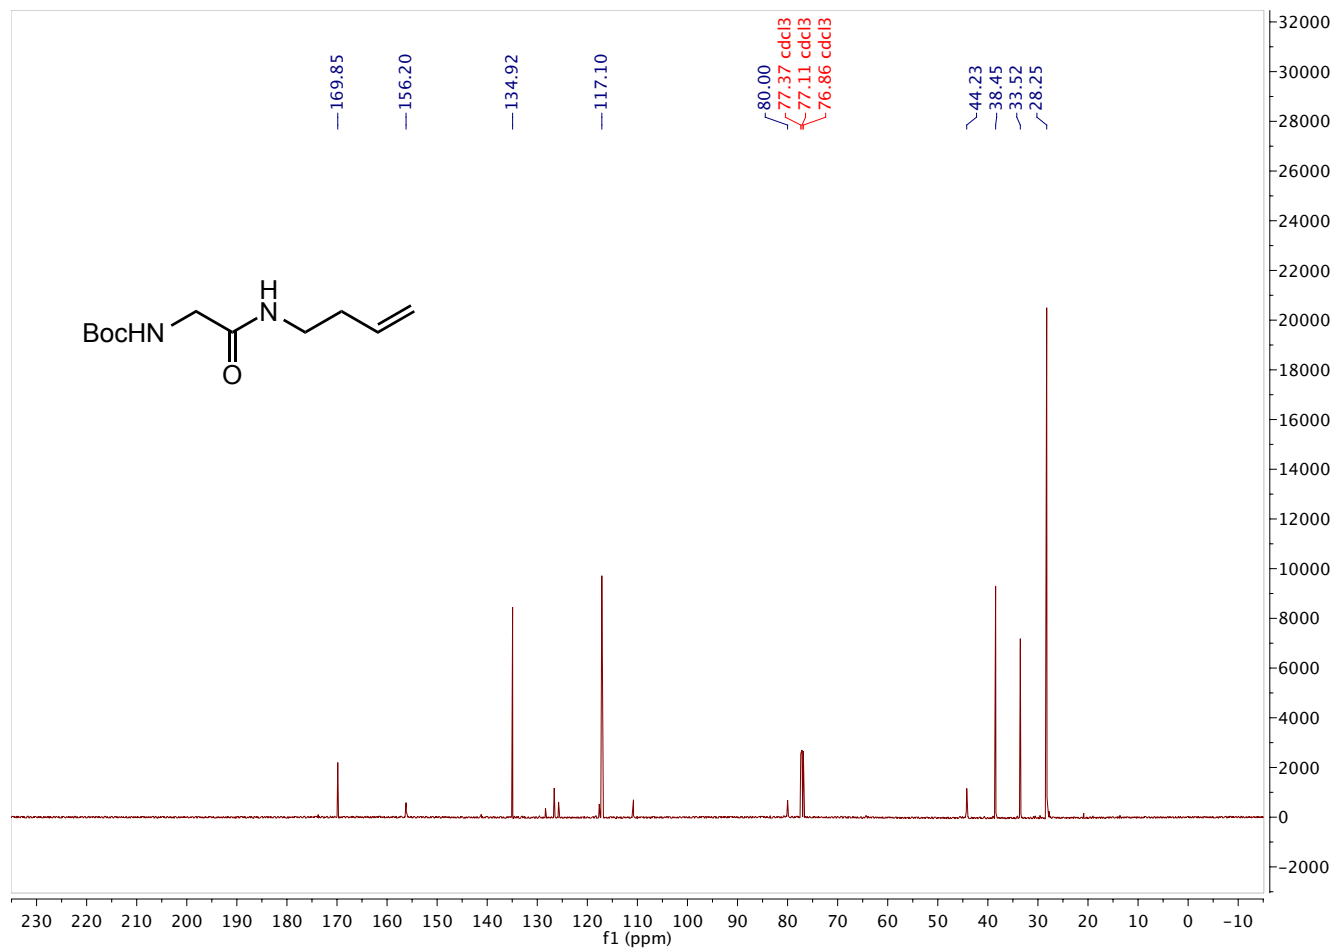

<sup>1</sup>H NMR (500 MHz, CDCl<sub>3</sub>) spectrum of compound **5f**

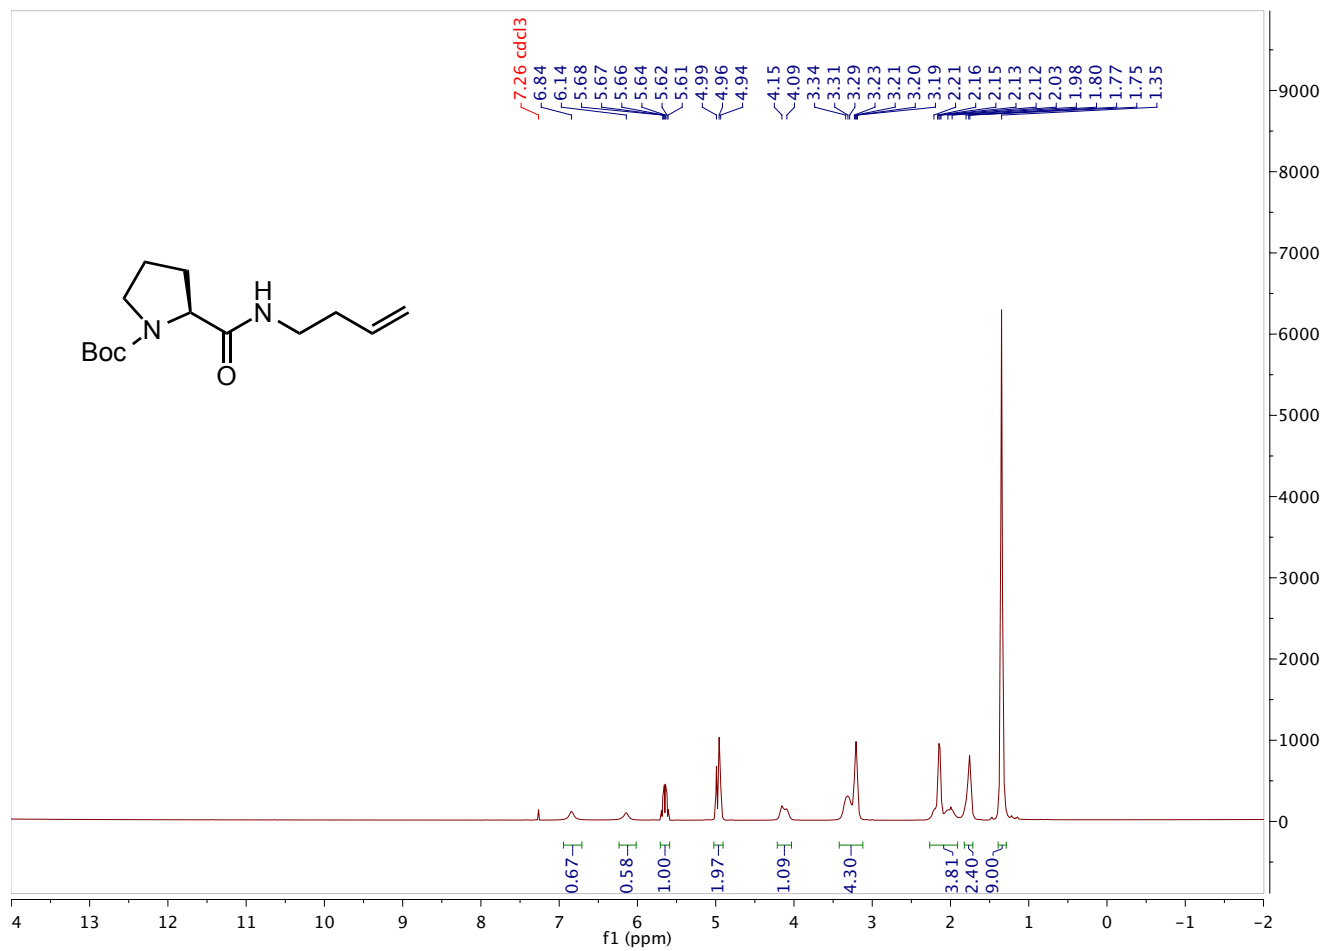

$^{13}\text{C}$  NMR (126 MHz,  $\text{CDCl}_3$ ) spectrum of compound **5f**

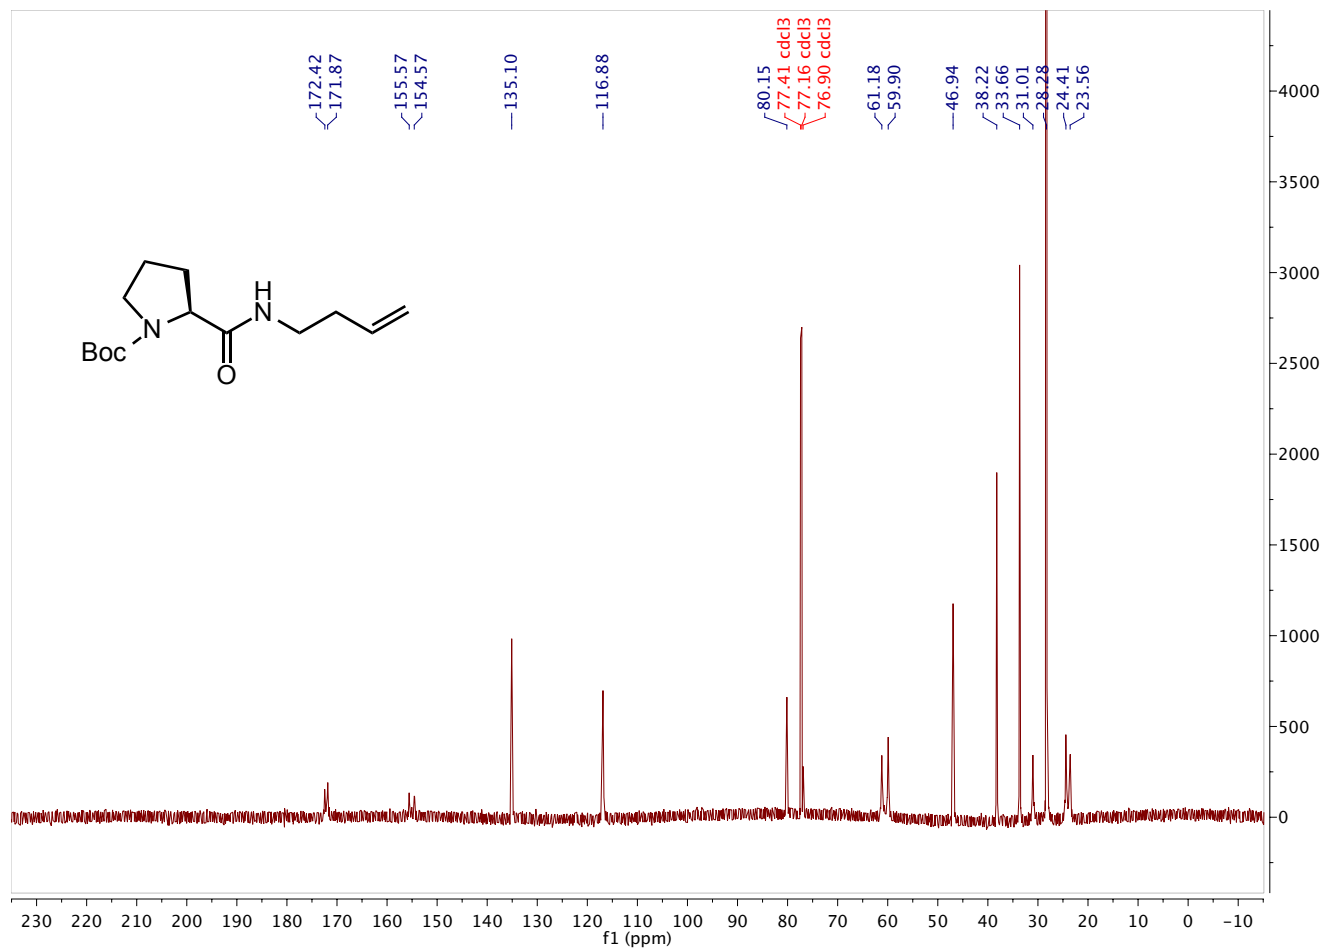

<sup>1</sup>H NMR (500 MHz, CDCl<sub>3</sub>) spectrum of compound **5g**

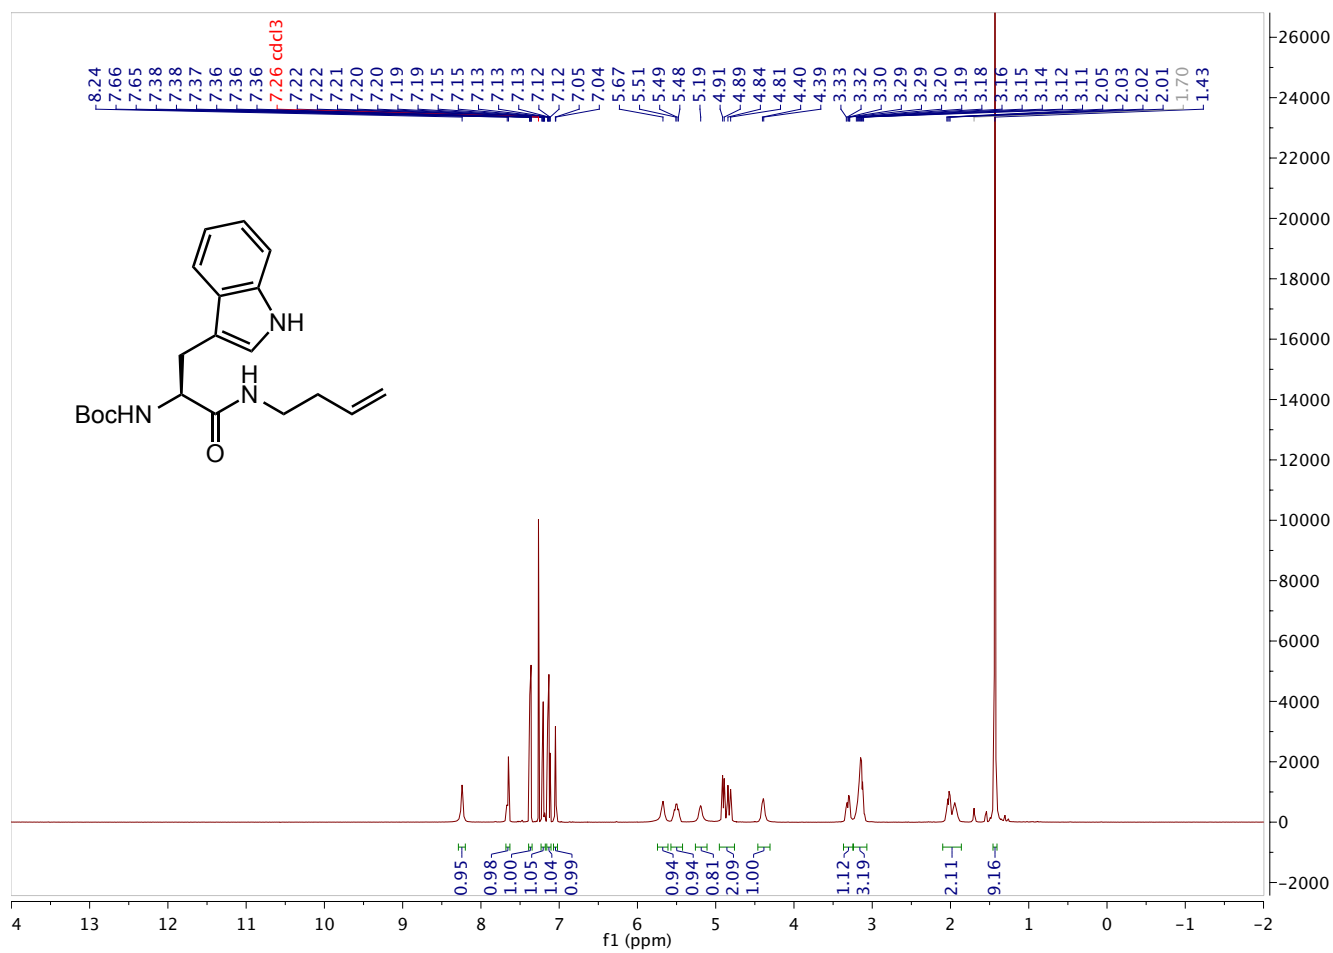

<sup>13</sup>C NMR (126 MHz, CDCl<sub>3</sub>) spectrum of compound **5g**

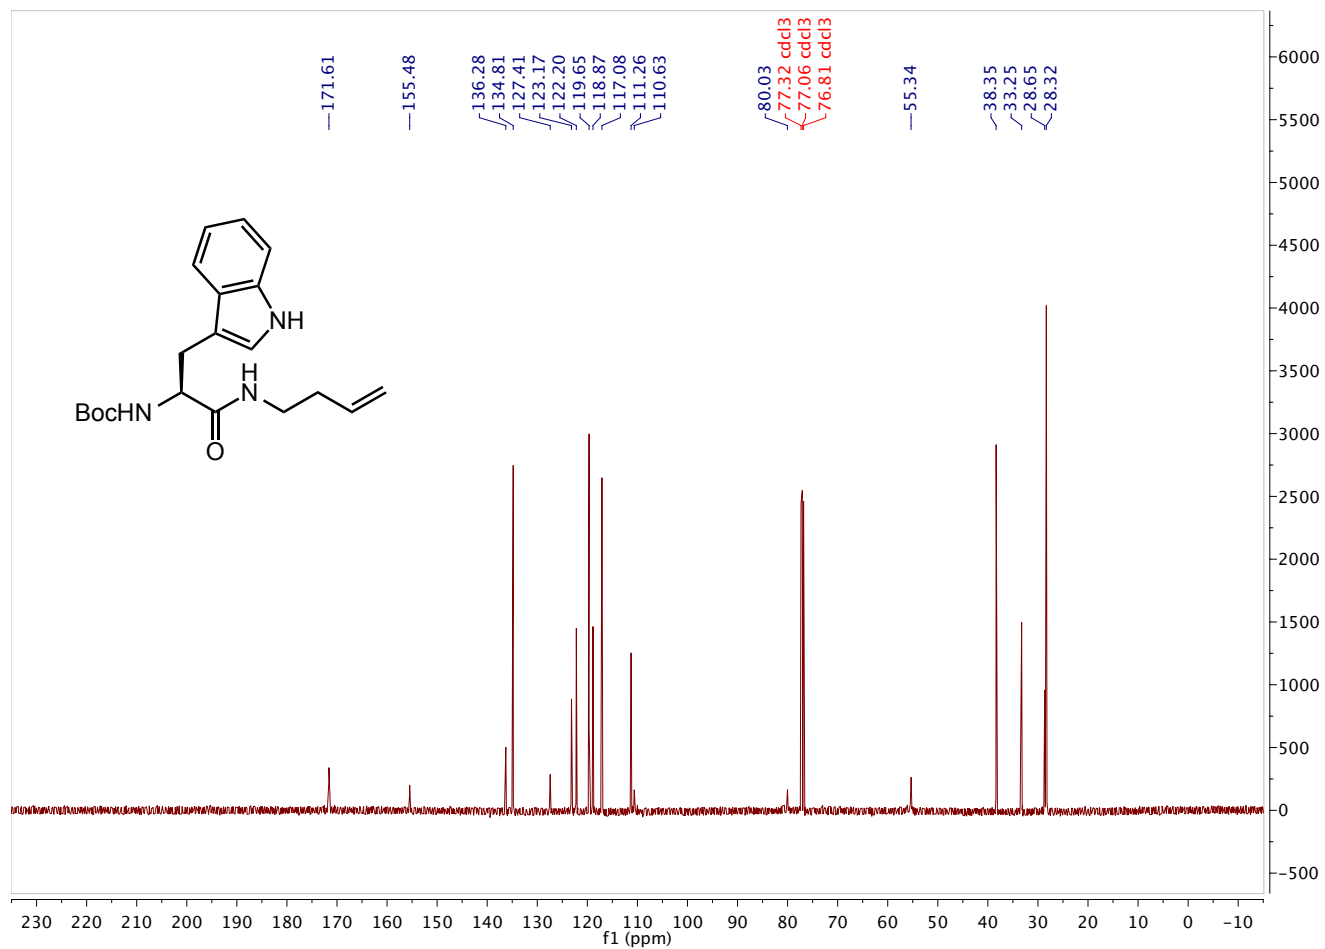

$^1\text{H}$  NMR (500 MHz,  $\text{CD}_3\text{OD}$ ) spectrum of compound **5h**

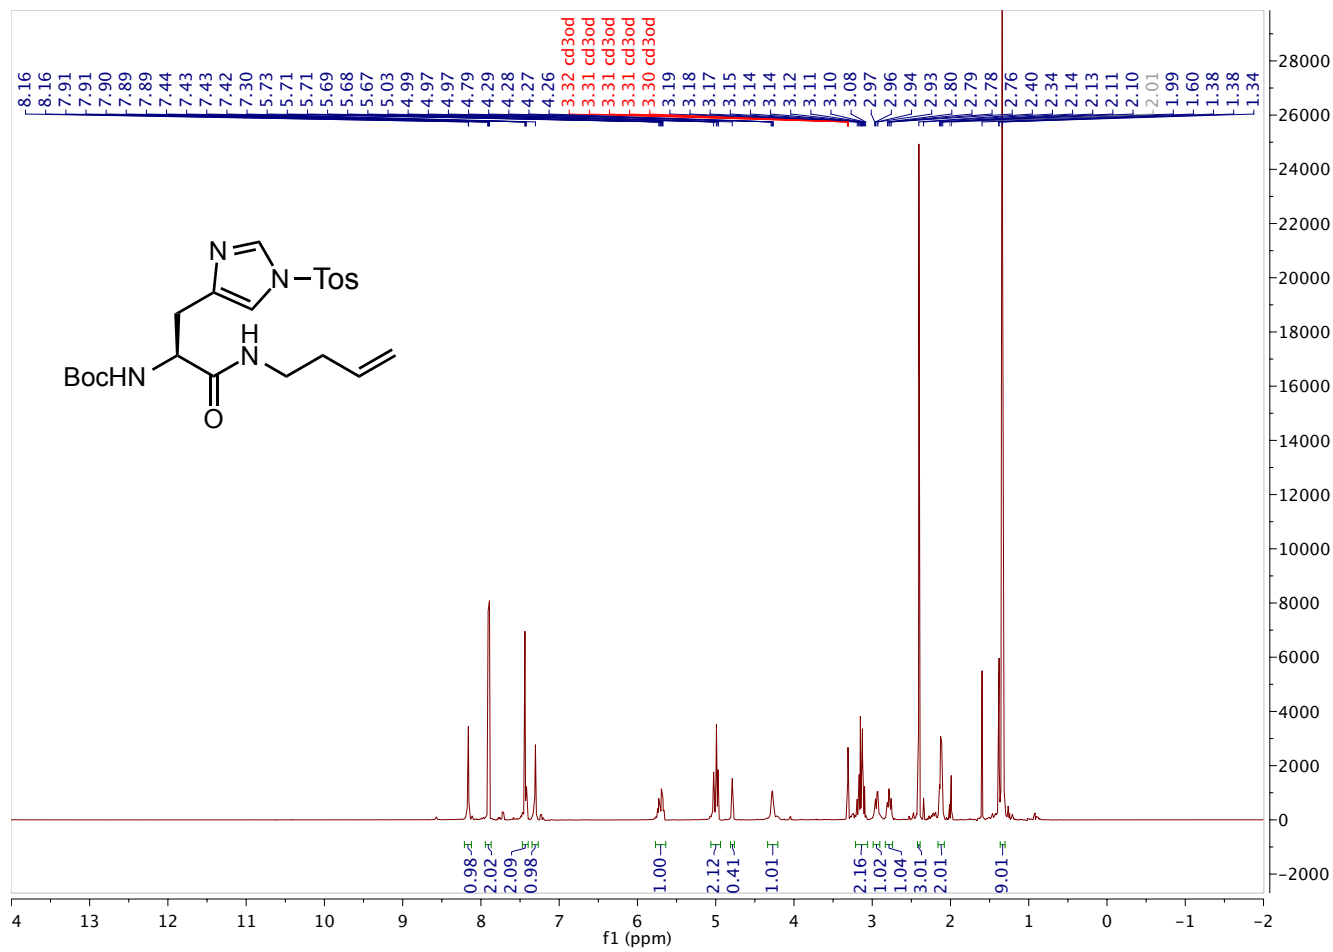

$^{13}\text{C}$  NMR (126 MHz,  $\text{CD}_3\text{OD}$ ) spectrum of compound **5h**

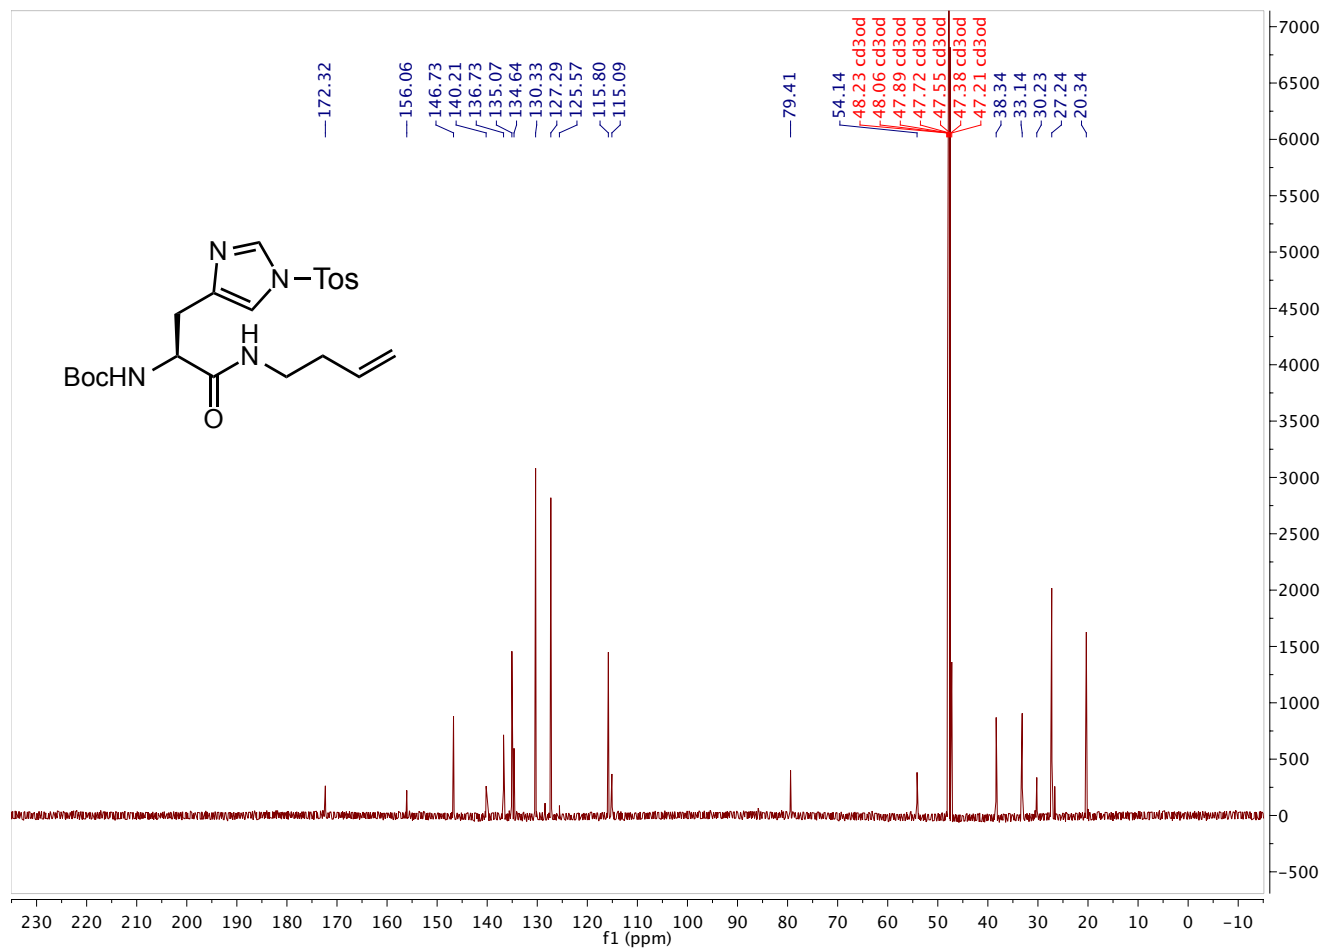



$^1\text{H}$  NMR (500 MHz,  $\text{CDCl}_3$ ) spectrum of compound **5i**

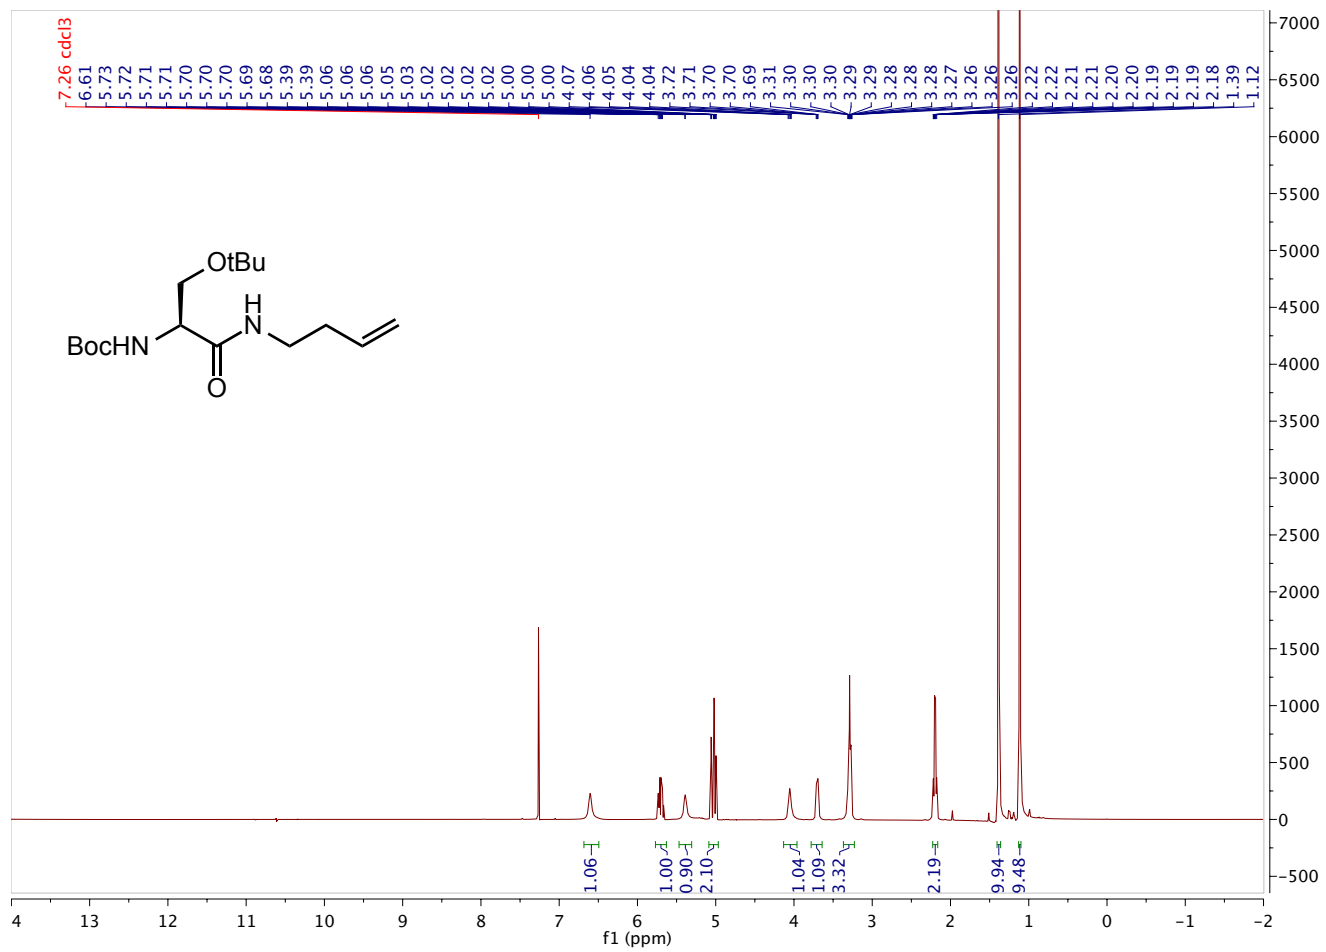

$^{13}\text{C}$  NMR (126 MHz,  $\text{CDCl}_3$ ) spectrum of compound **5i**

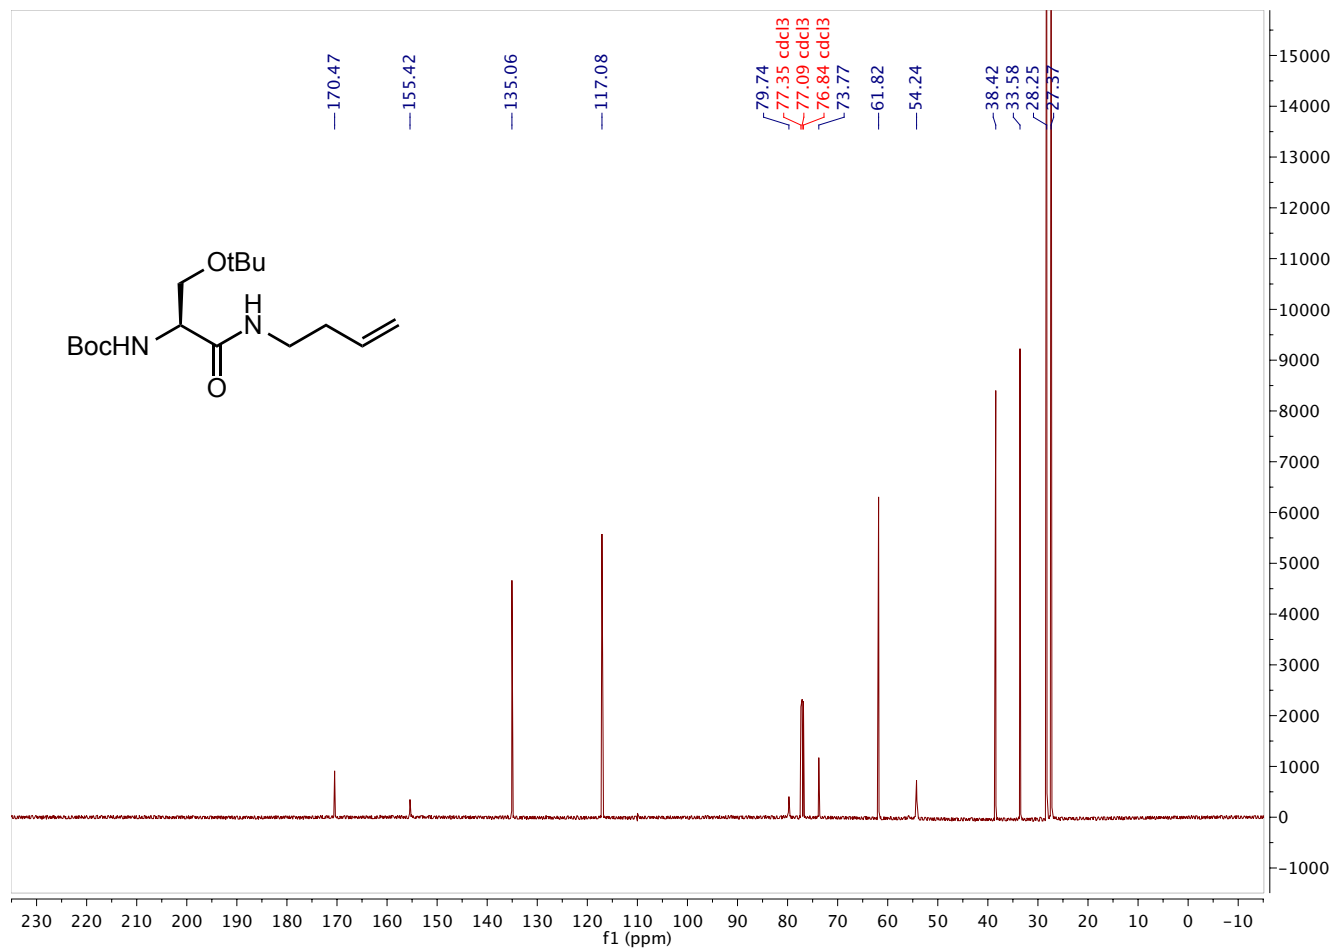

<sup>1</sup>H NMR (500 MHz, CDCl<sub>3</sub>) spectrum of compound **5j**

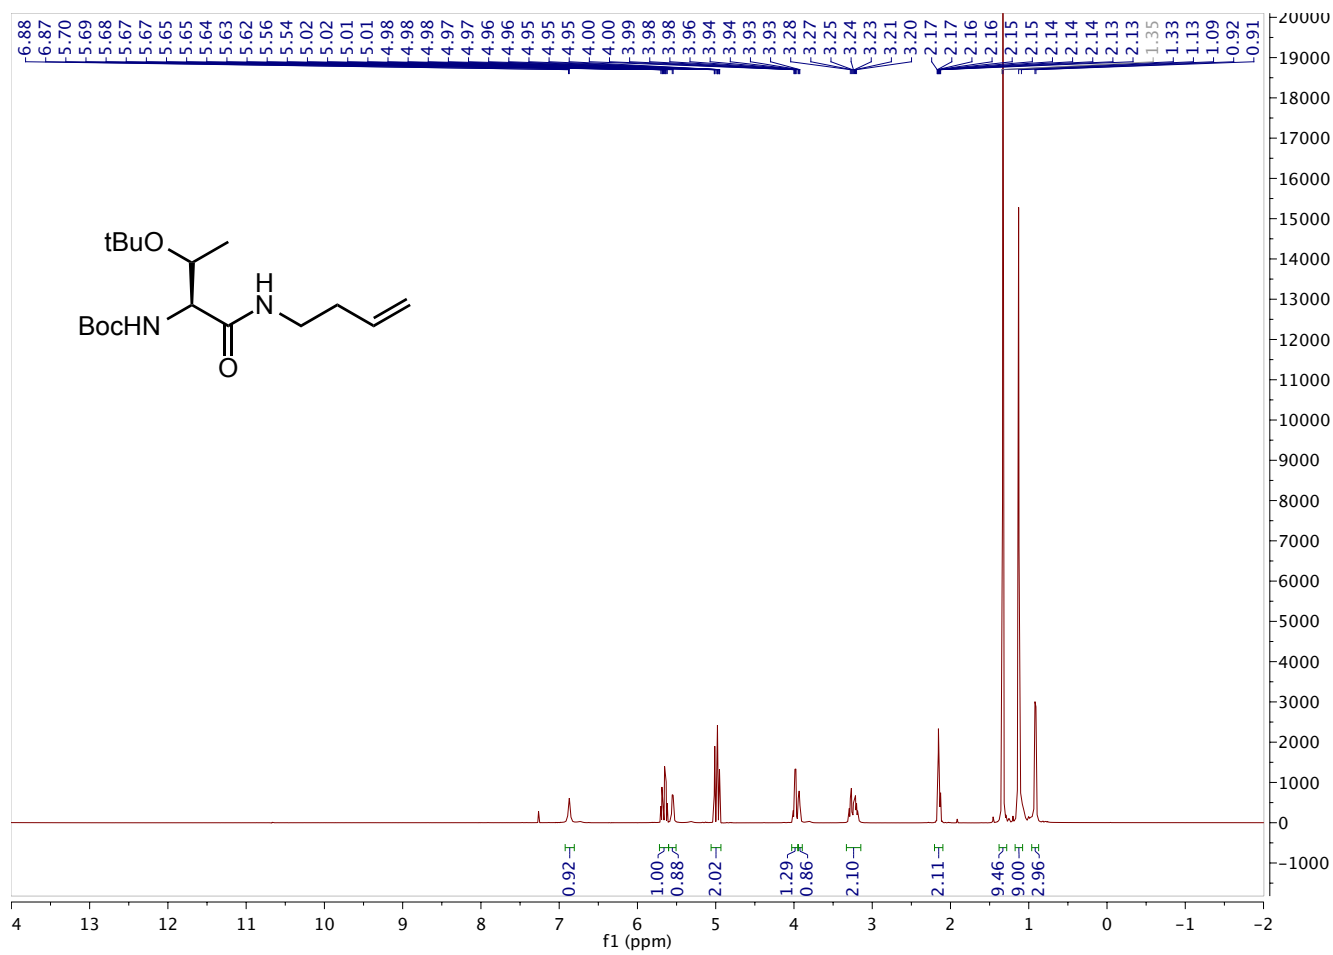

$^{13}\text{C}$  NMR (126 MHz,  $\text{CDCl}_3$ ) spectrum of compound **5j**

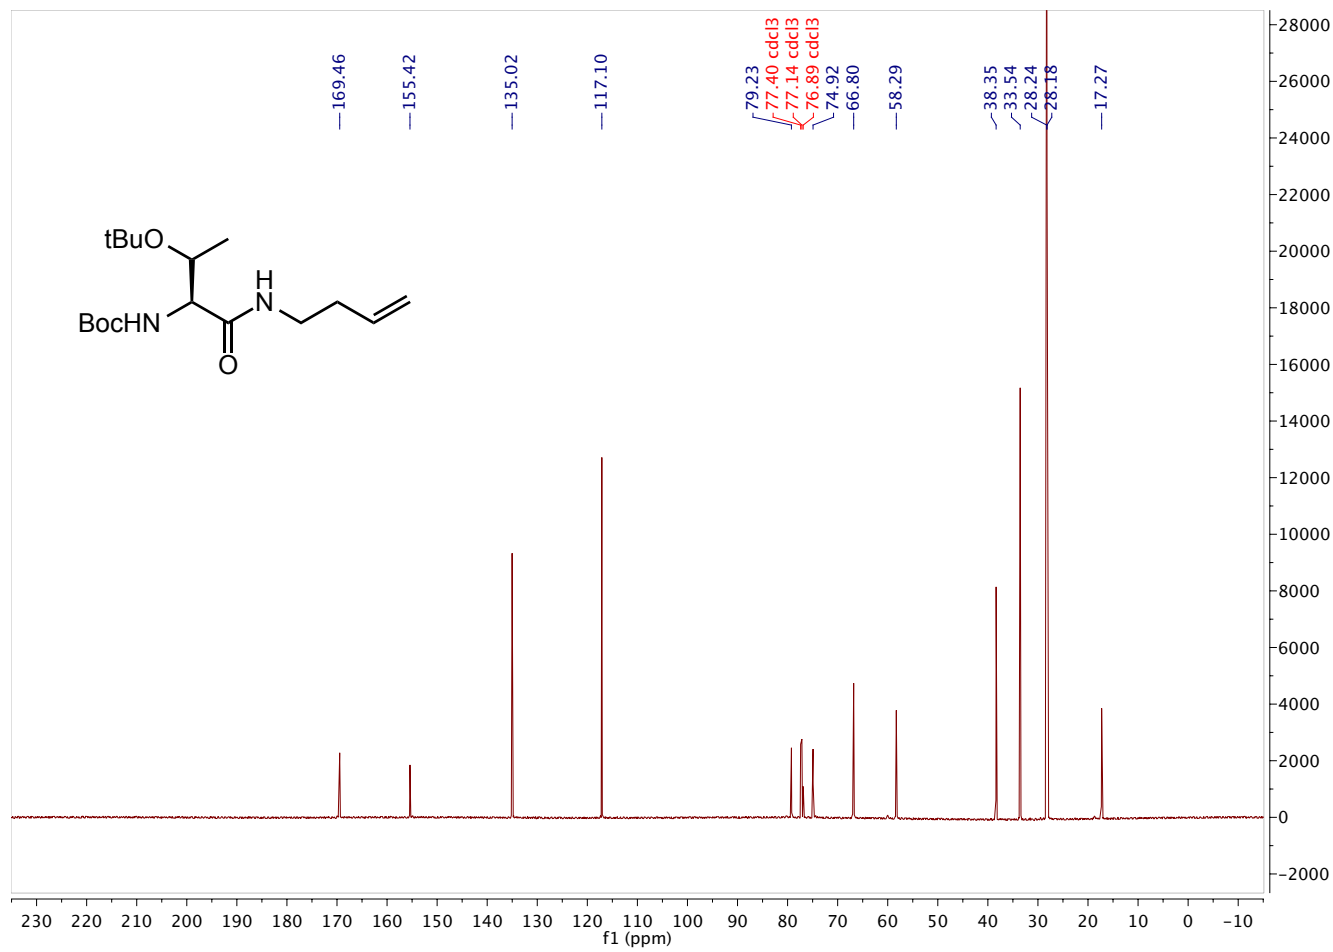

$^1\text{H}$  NMR (500 MHz,  $\text{CDCl}_3$ ) spectrum of compound **5k**

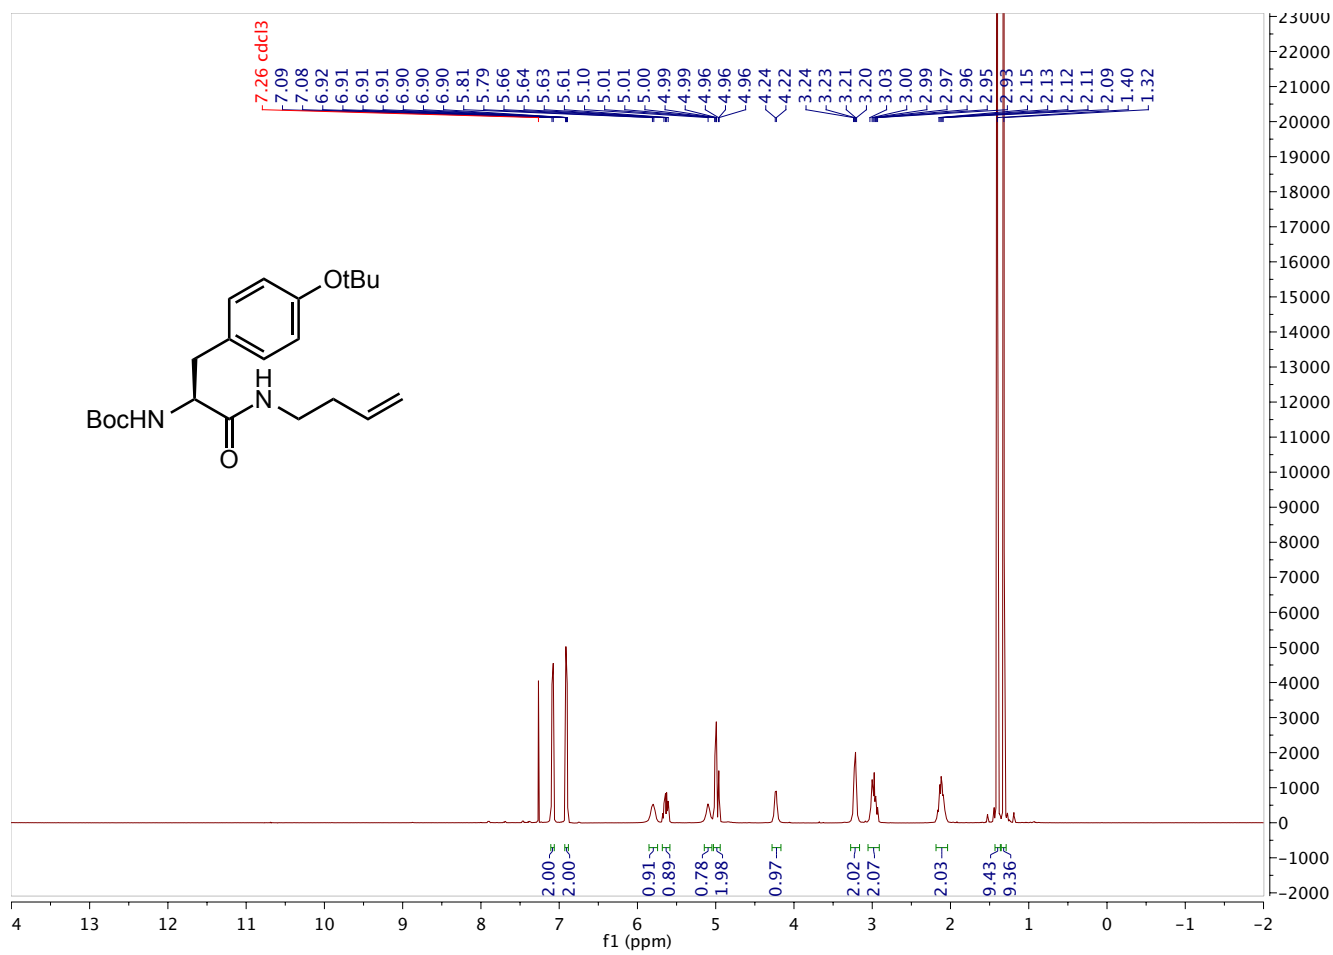

$^{13}\text{C}$  NMR (126 MHz,  $\text{CDCl}_3$ ) spectrum of compound **5k**

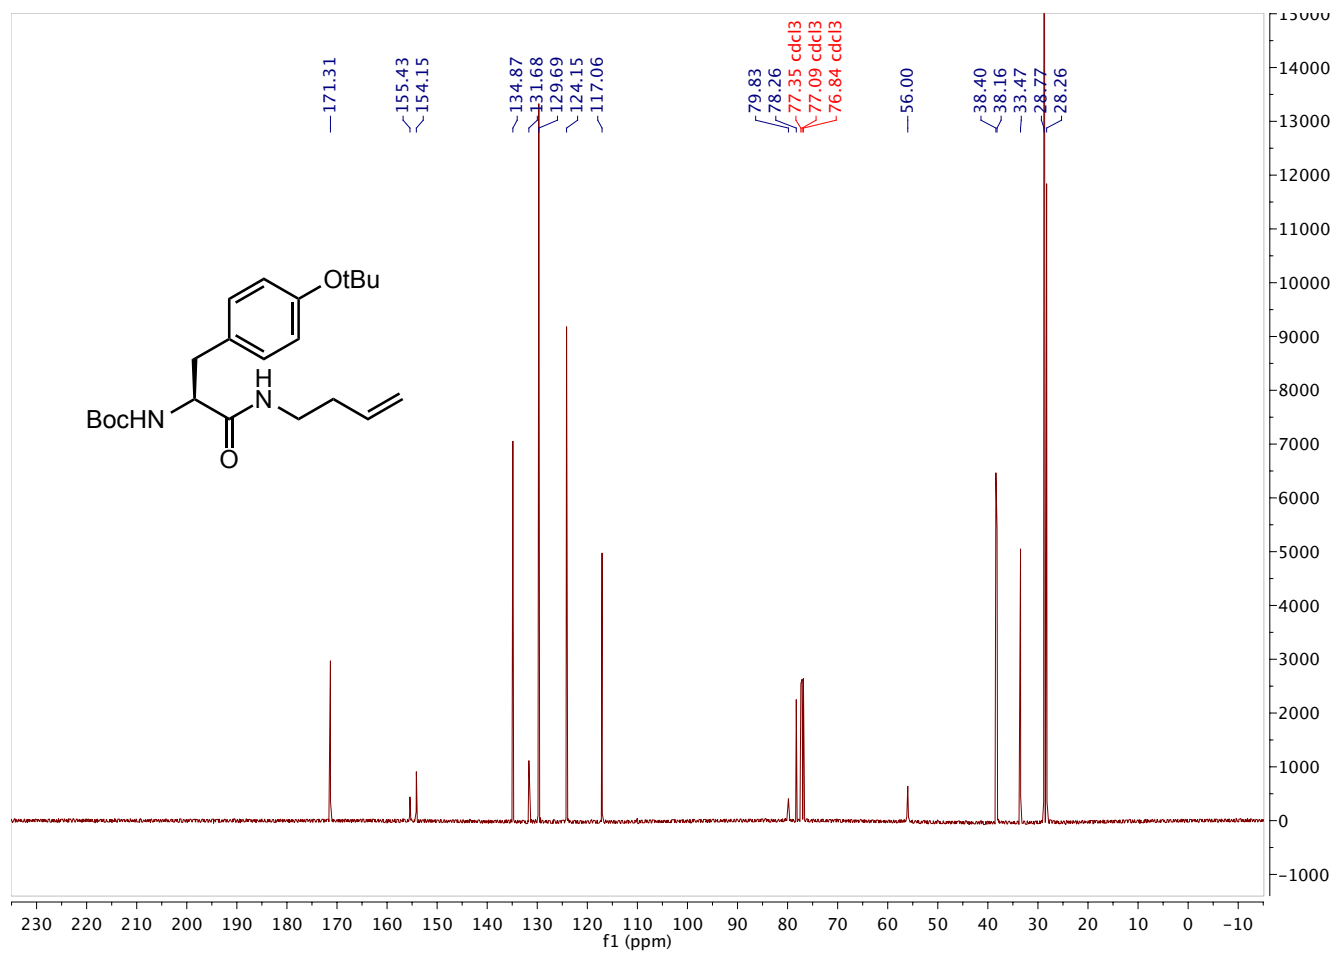

$^1\text{H}$  NMR (500 MHz,  $\text{CDCl}_3$ ) spectrum of compound **51**

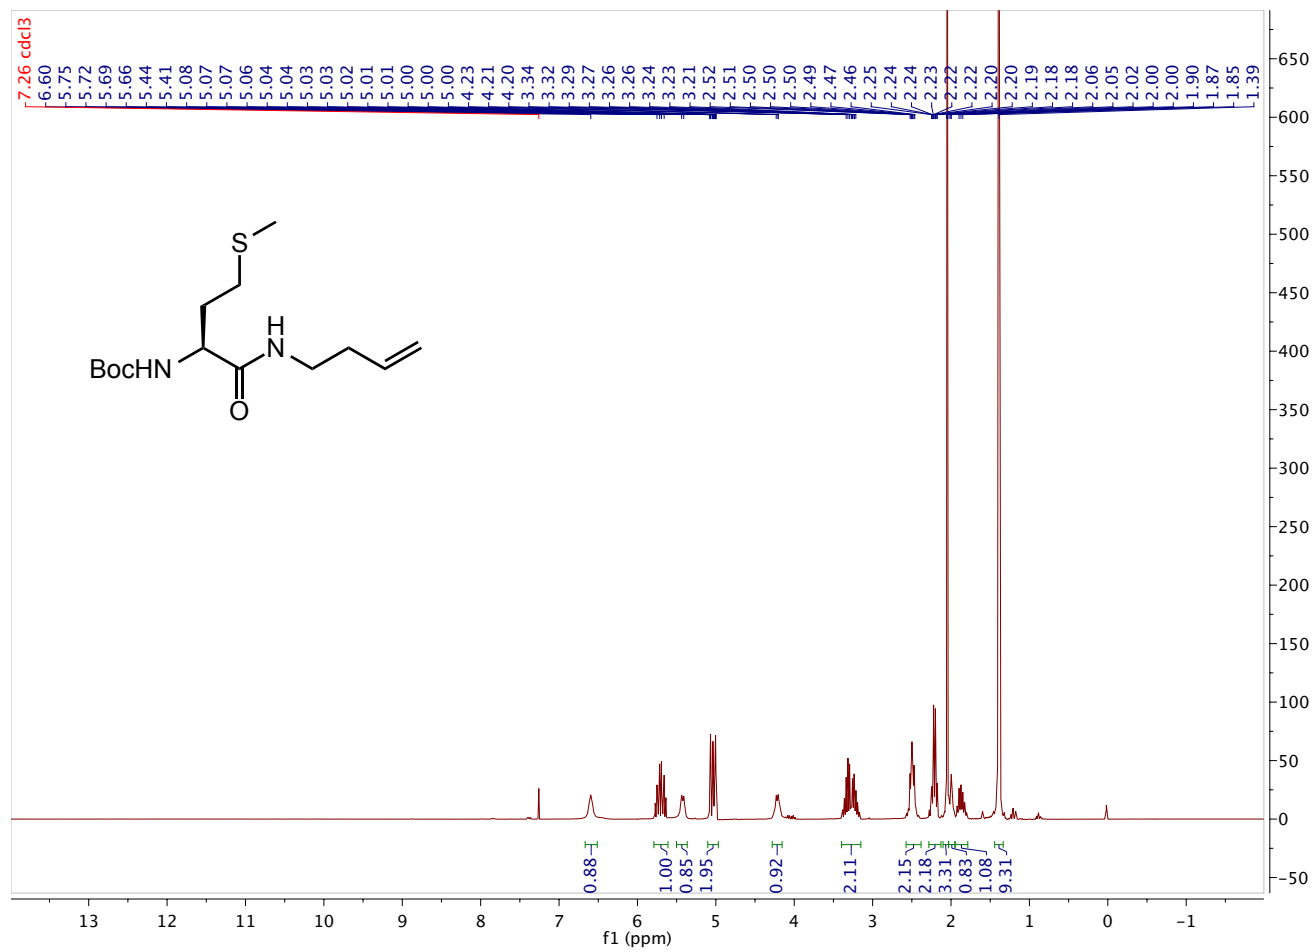

$^{13}\text{C}$  NMR (126 MHz,  $\text{CDCl}_3$ ) spectrum of compound **51**

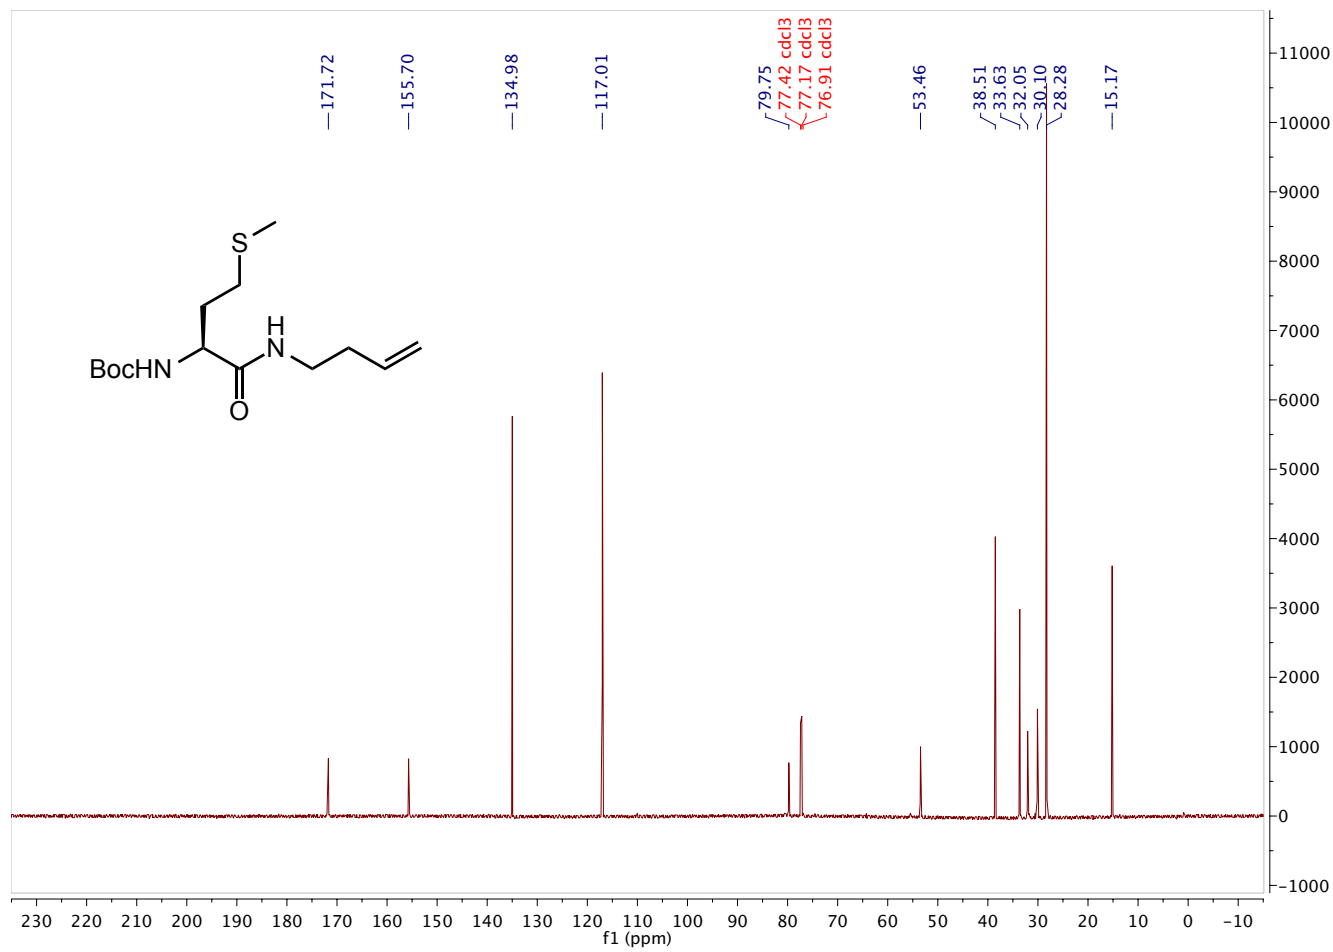



$^1\text{H}$  NMR (500 MHz,  $\text{CDCl}_3$ ) spectrum of compound **5m**

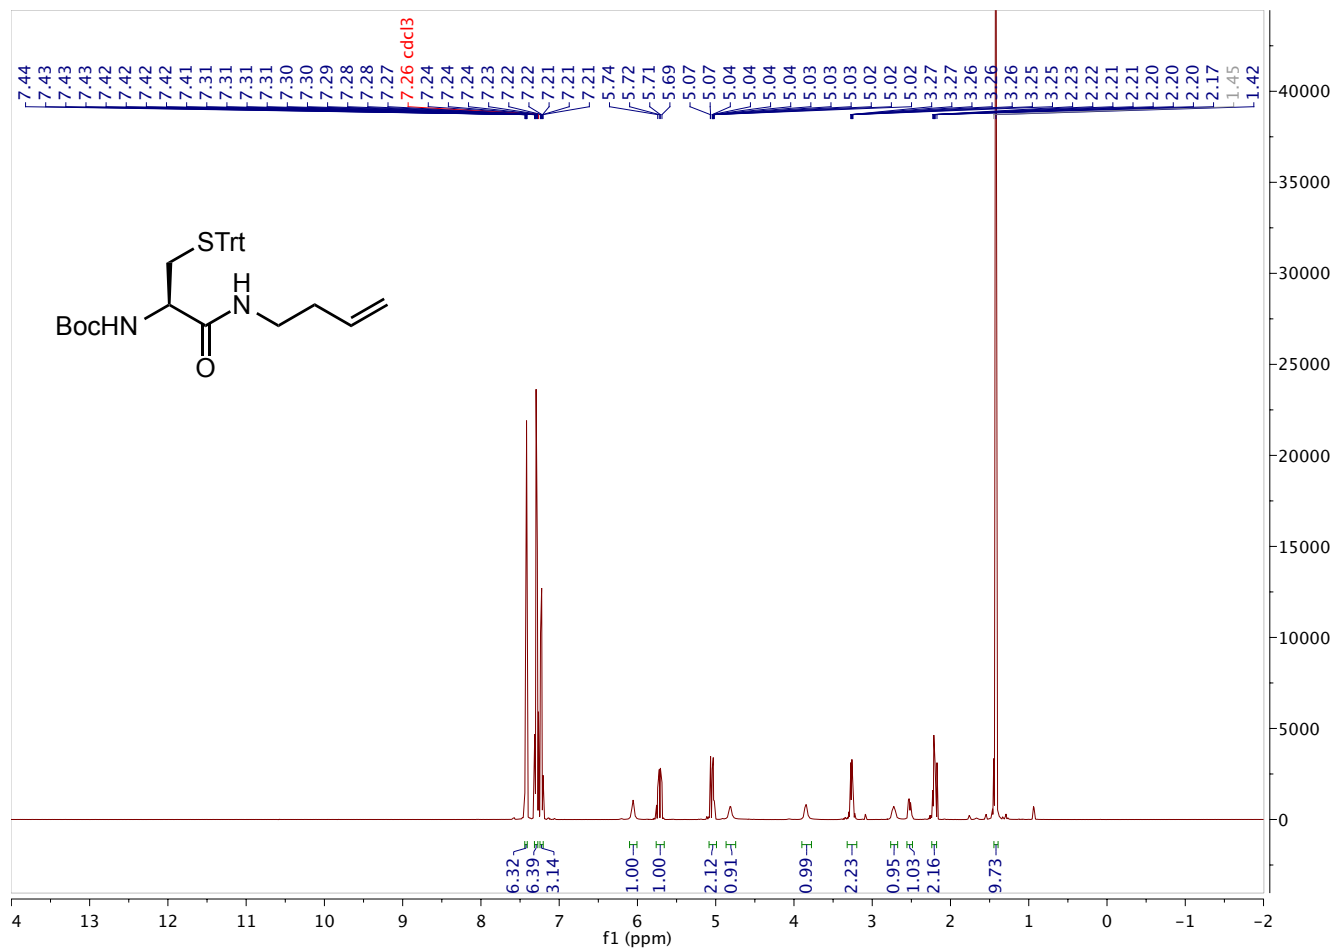

$^{13}\text{C}$  NMR (126 MHz,  $\text{CDCl}_3$ ) spectrum of compound **5m**

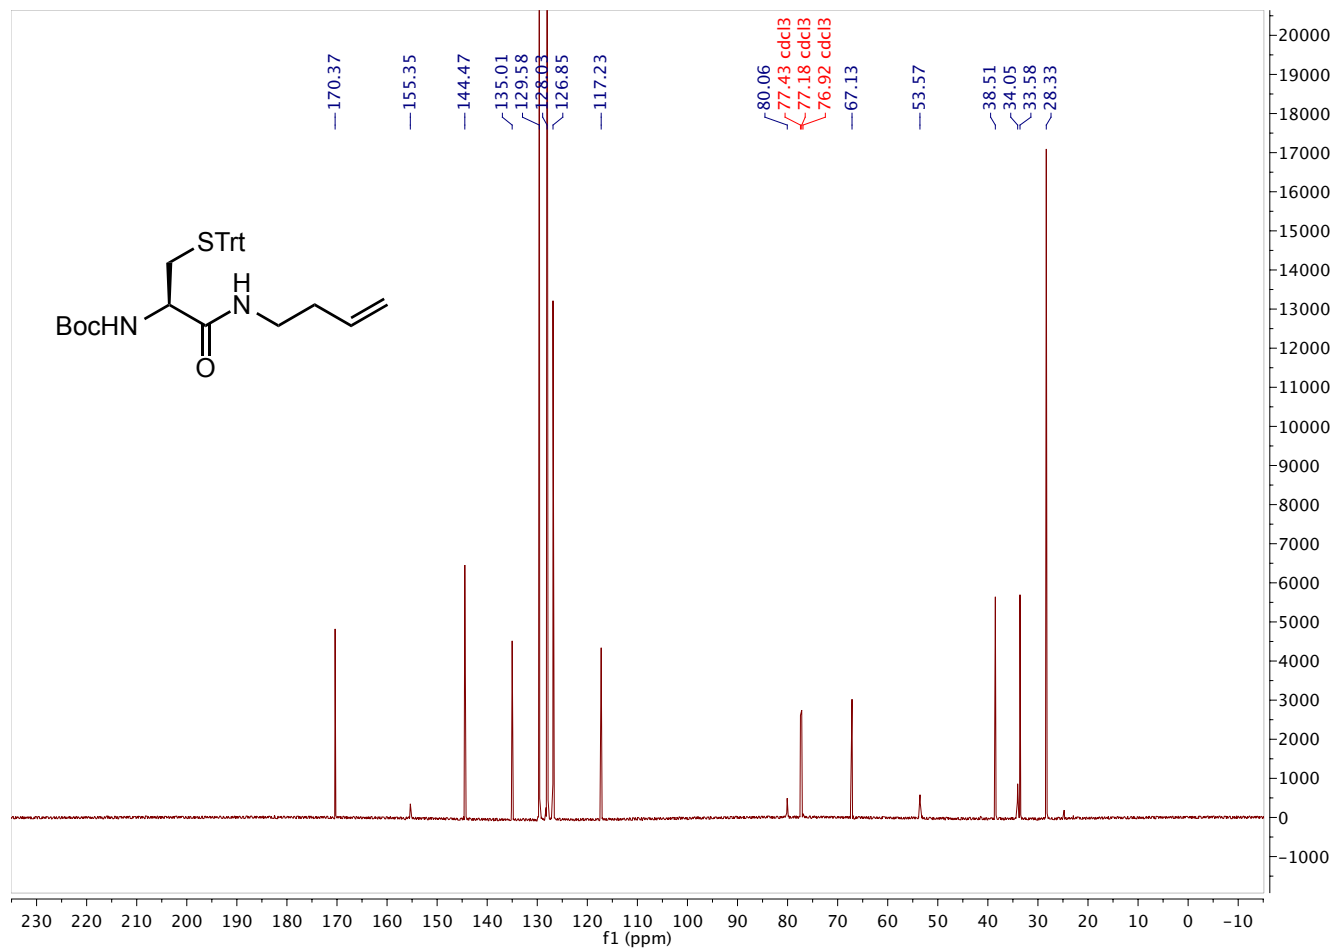

$^1\text{H}$  NMR (500 MHz,  $\text{CDCl}_3$ ) spectrum of compound **5n**

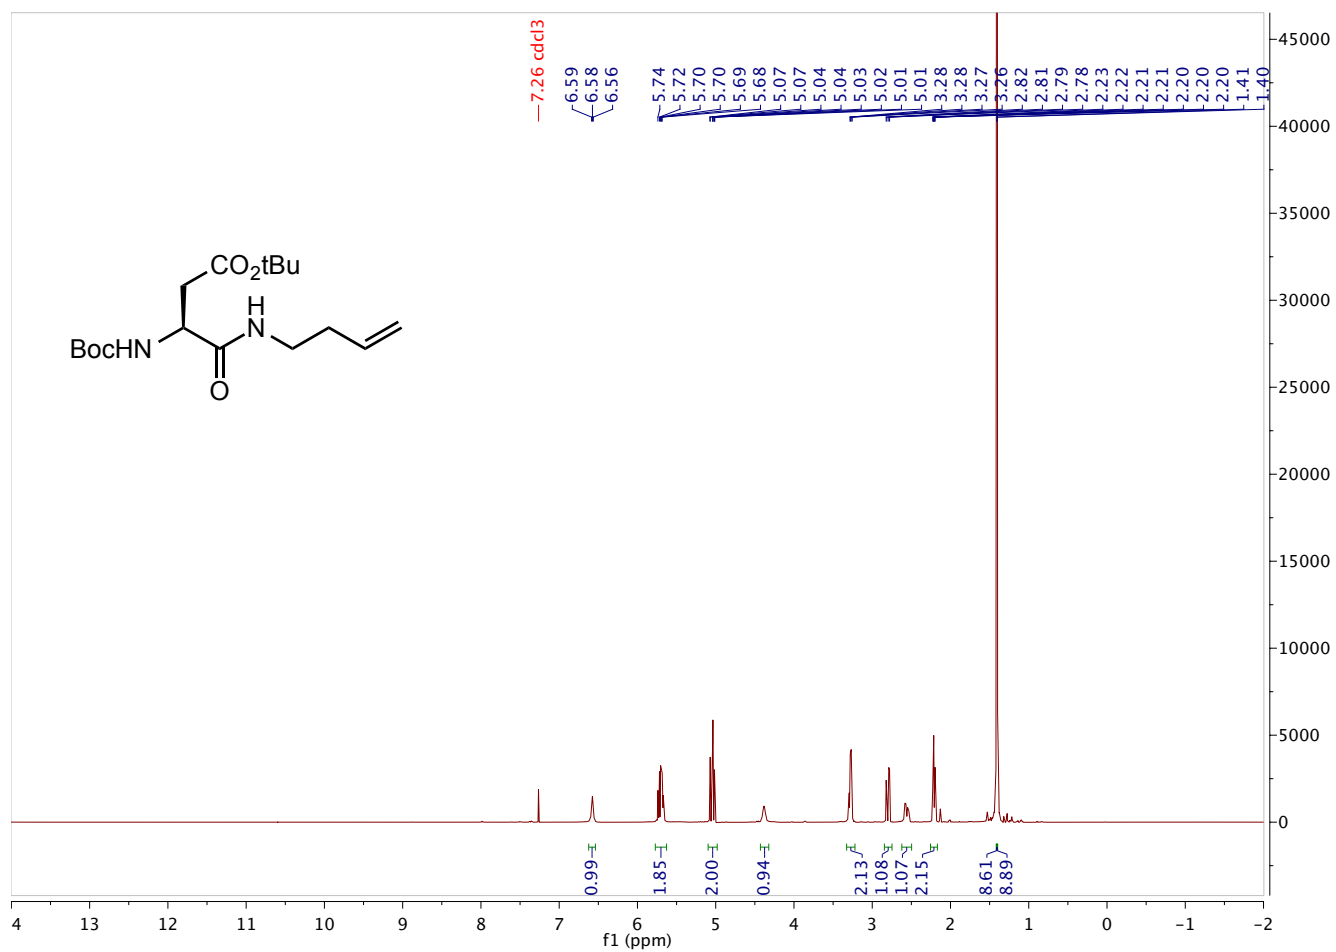

$^{13}\text{C}$  NMR (126 MHz,  $\text{CDCl}_3$ ) spectrum of compound **5n**

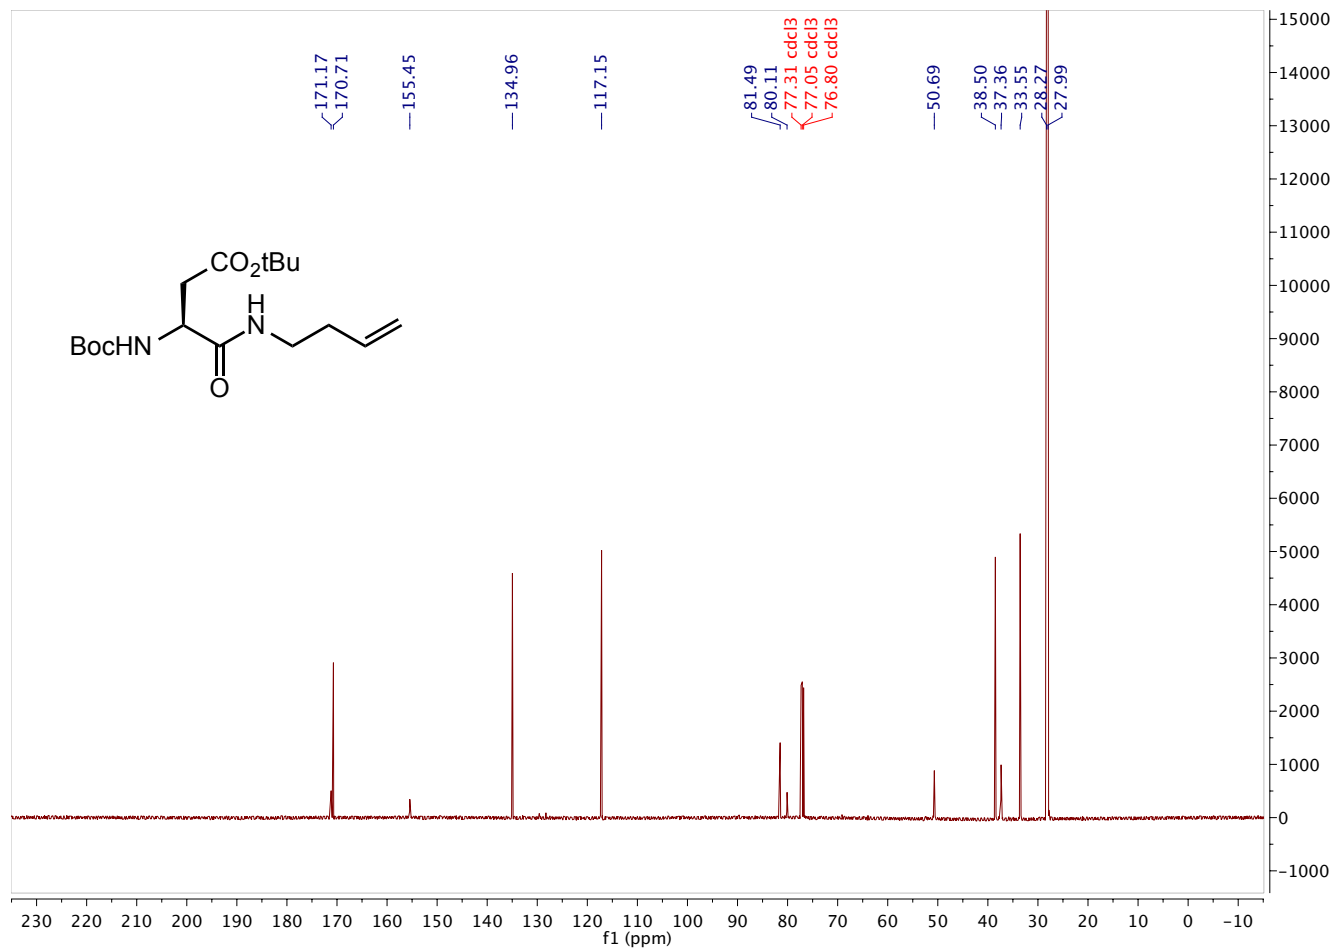

$^1\text{H}$  NMR (500 MHz,  $\text{CDCl}_3$ ) spectrum of compound **5o**

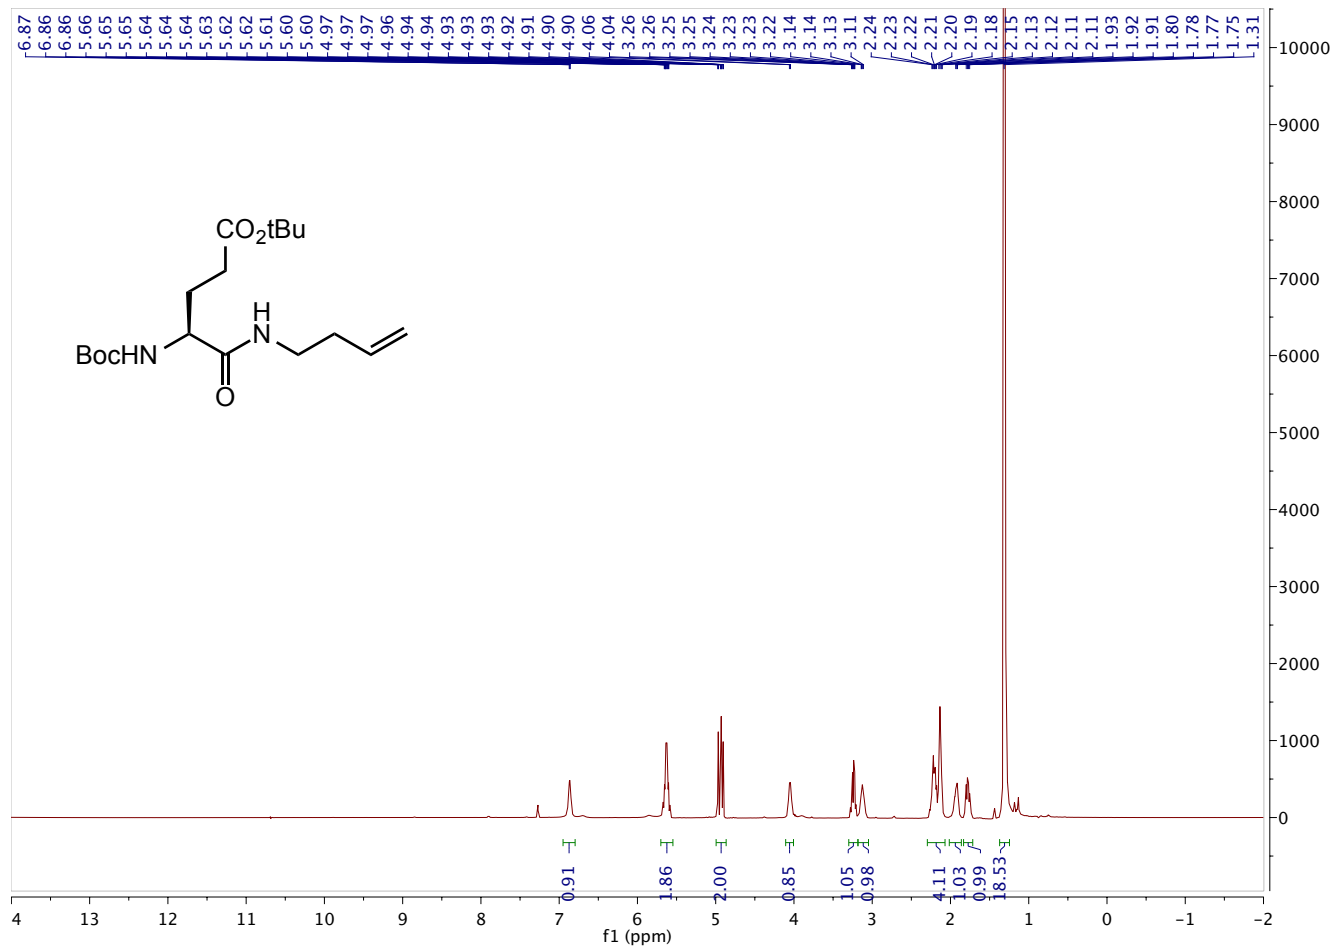

$^{13}\text{C}$  NMR (126 MHz,  $\text{CDCl}_3$ ) spectrum of compound **5o**

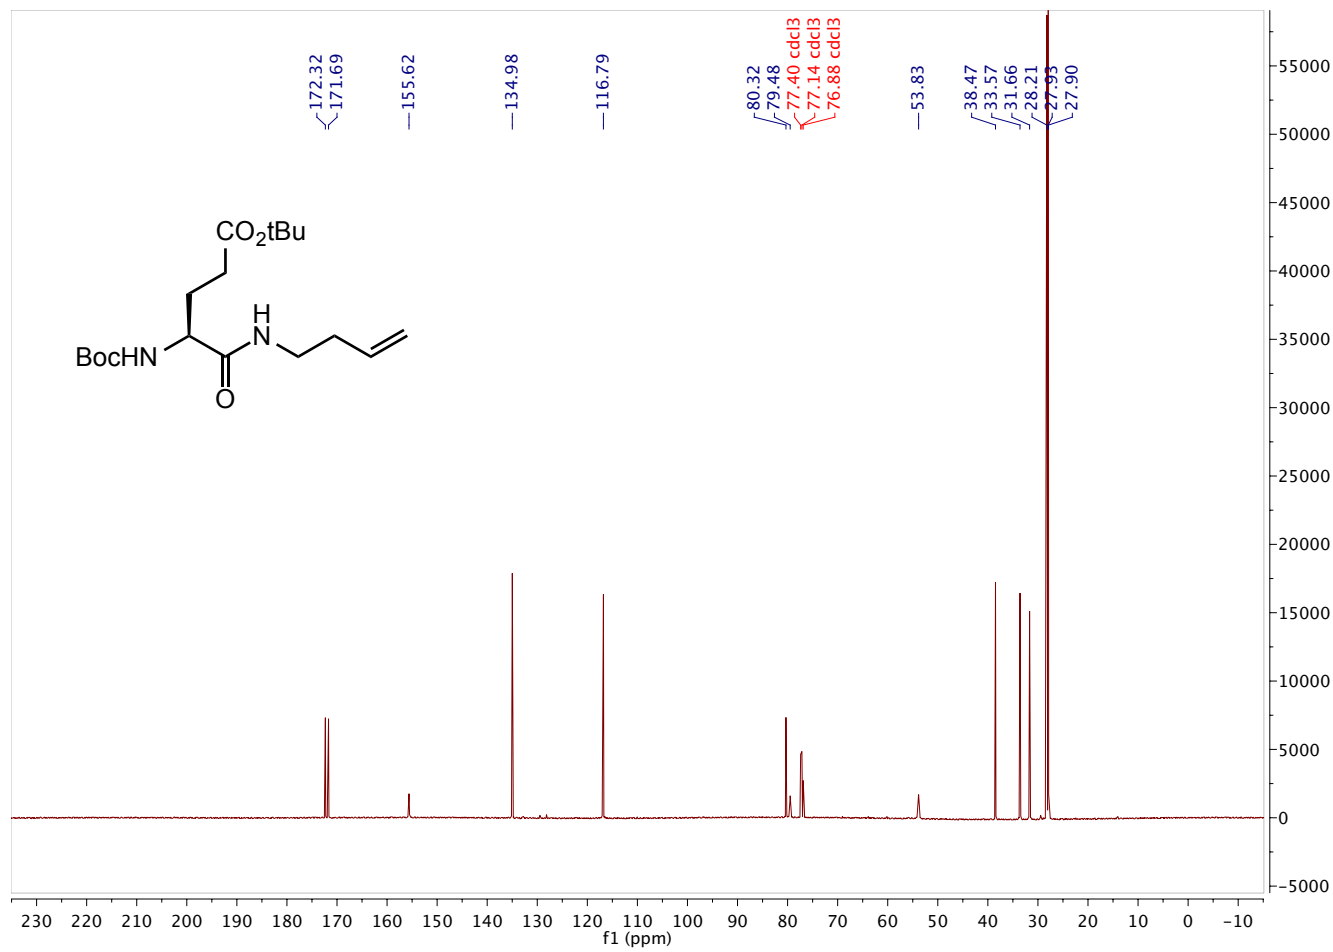

$^1\text{H}$  NMR (500 MHz,  $\text{CDCl}_3$ ) spectrum of compound **5p**

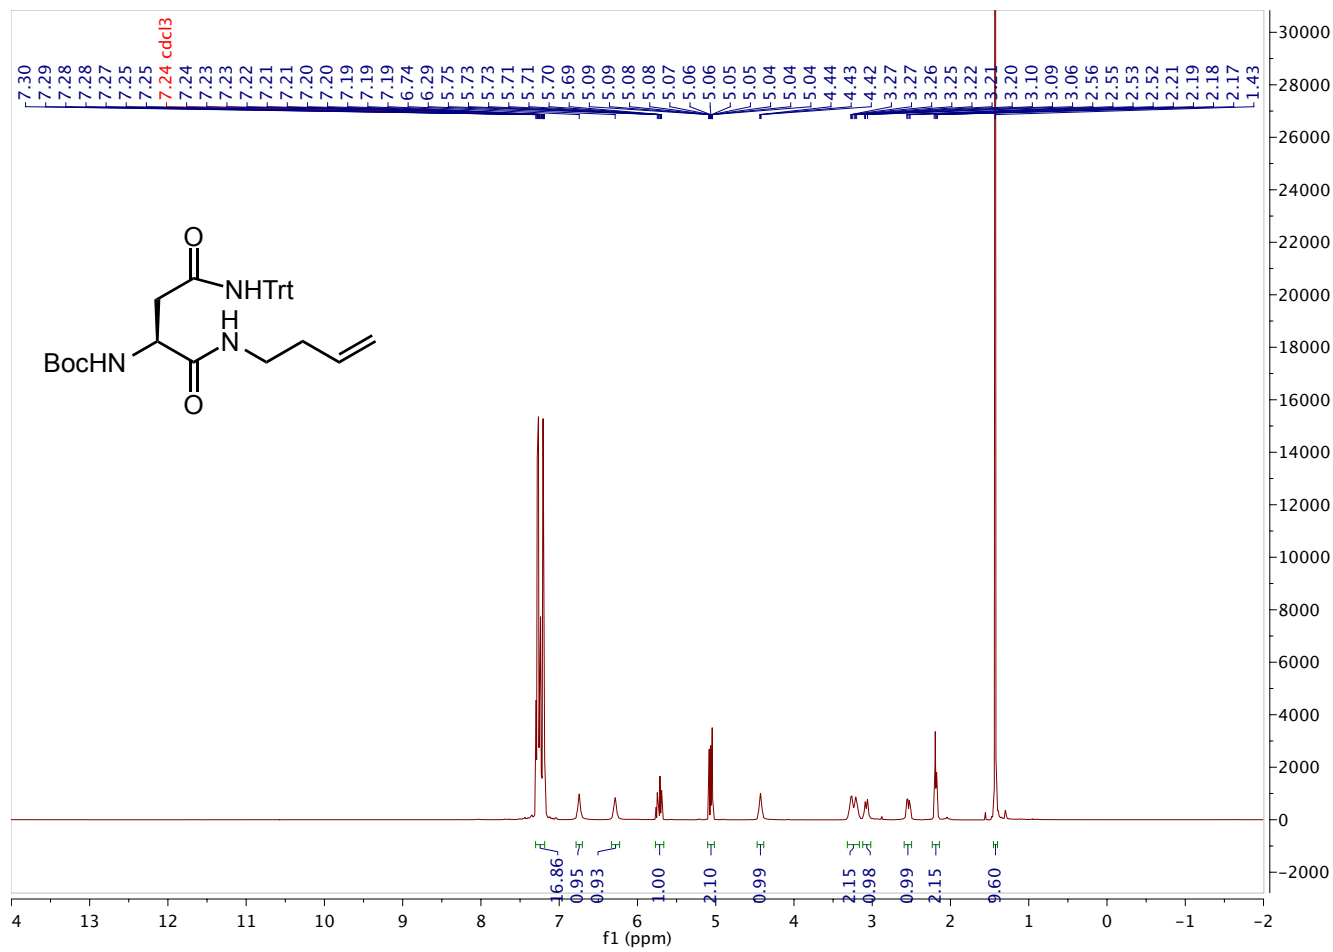

<sup>13</sup>C NMR (126 MHz, CDCl<sub>3</sub>) spectrum of compound **5p**

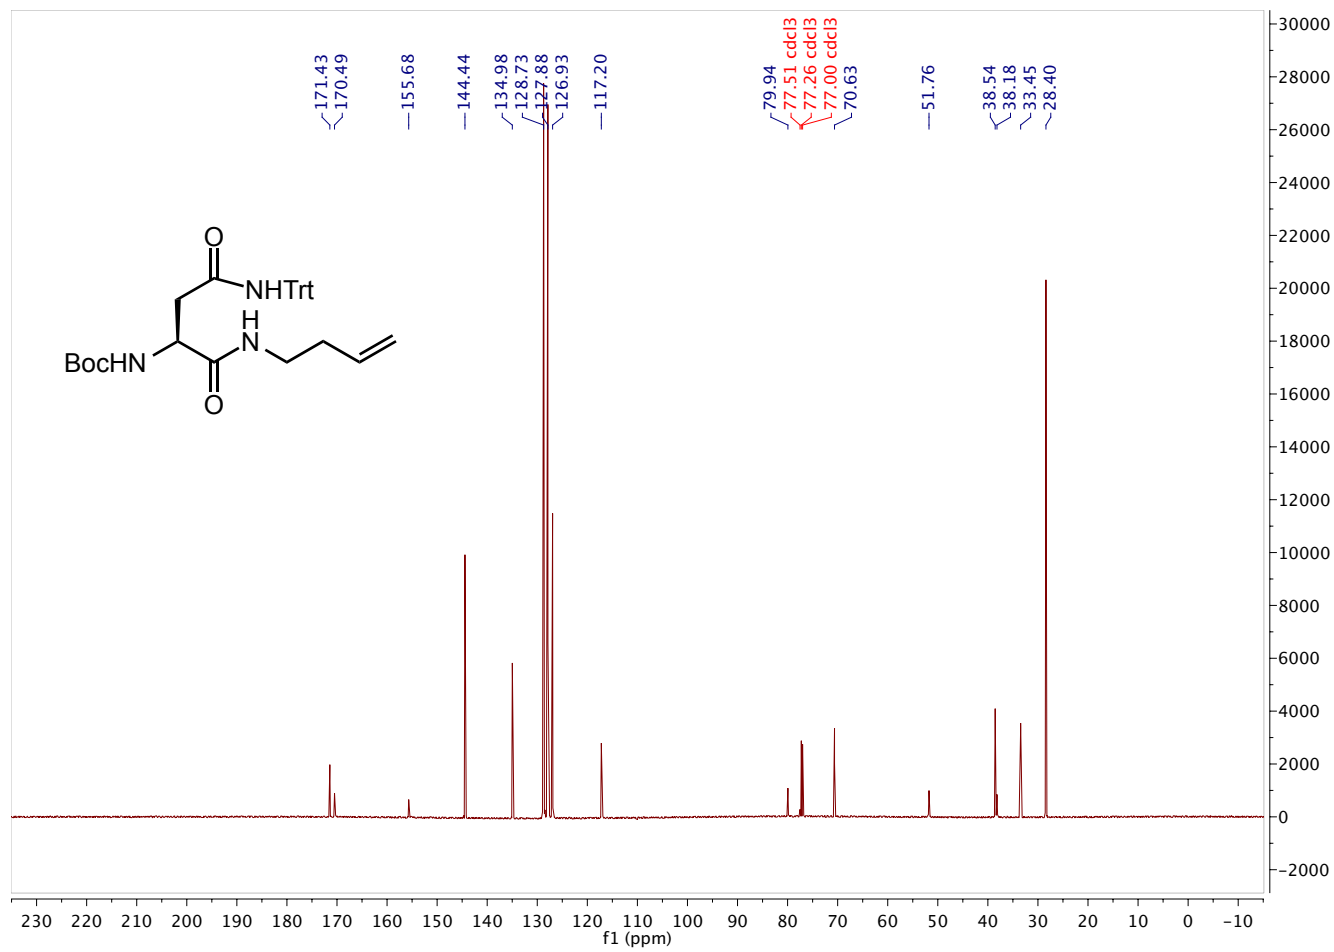



$^1\text{H}$  NMR (500 MHz,  $\text{CDCl}_3$ ) spectrum of compound **5q**

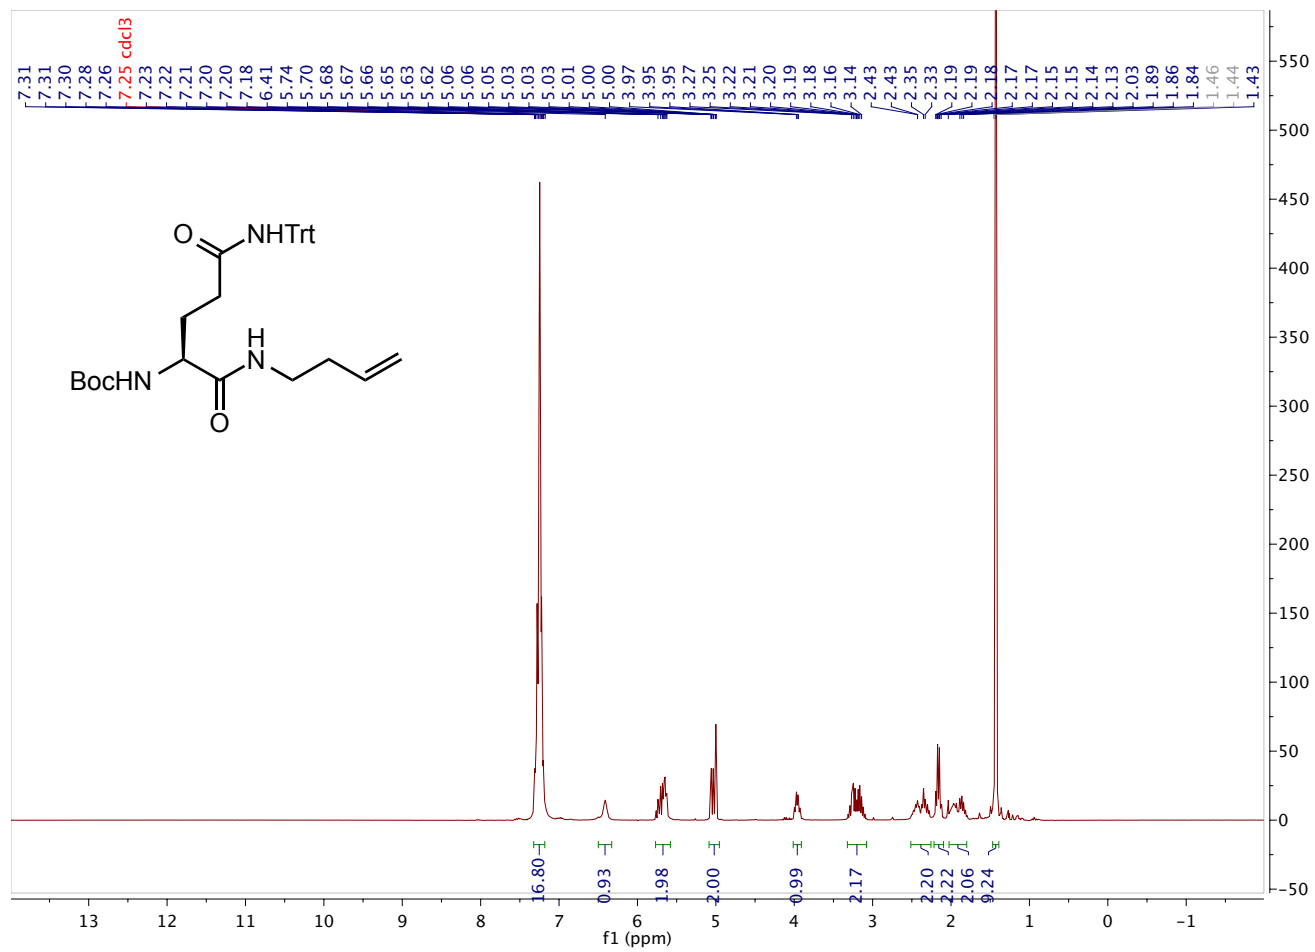

$^{13}\text{C}$  NMR (126 MHz,  $\text{CDCl}_3$ ) spectrum of compound **5q**

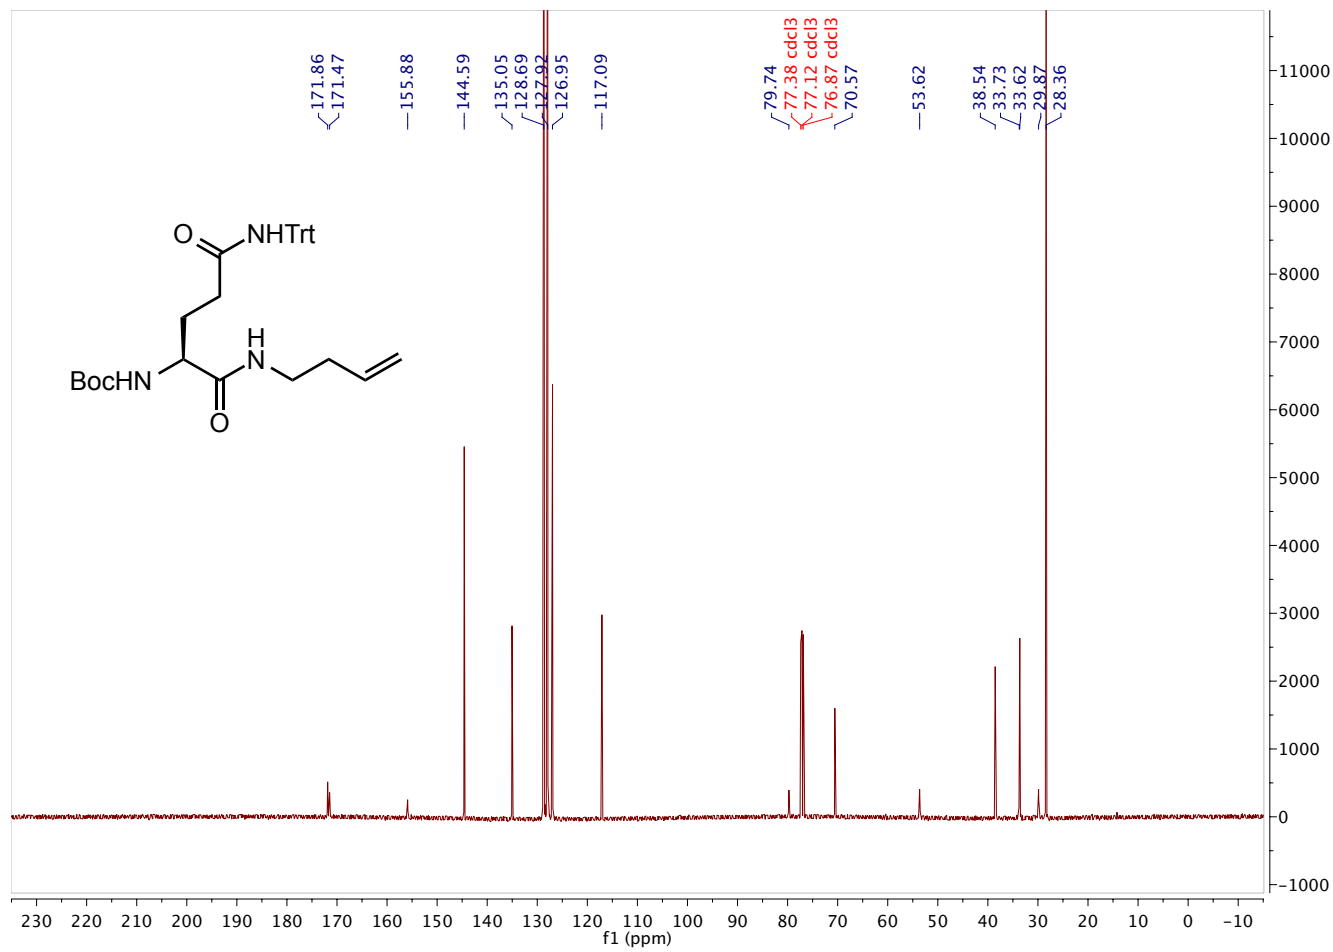

$^1\text{H}$  NMR (500 MHz,  $\text{CDCl}_3$ ) spectrum of compound **5r**

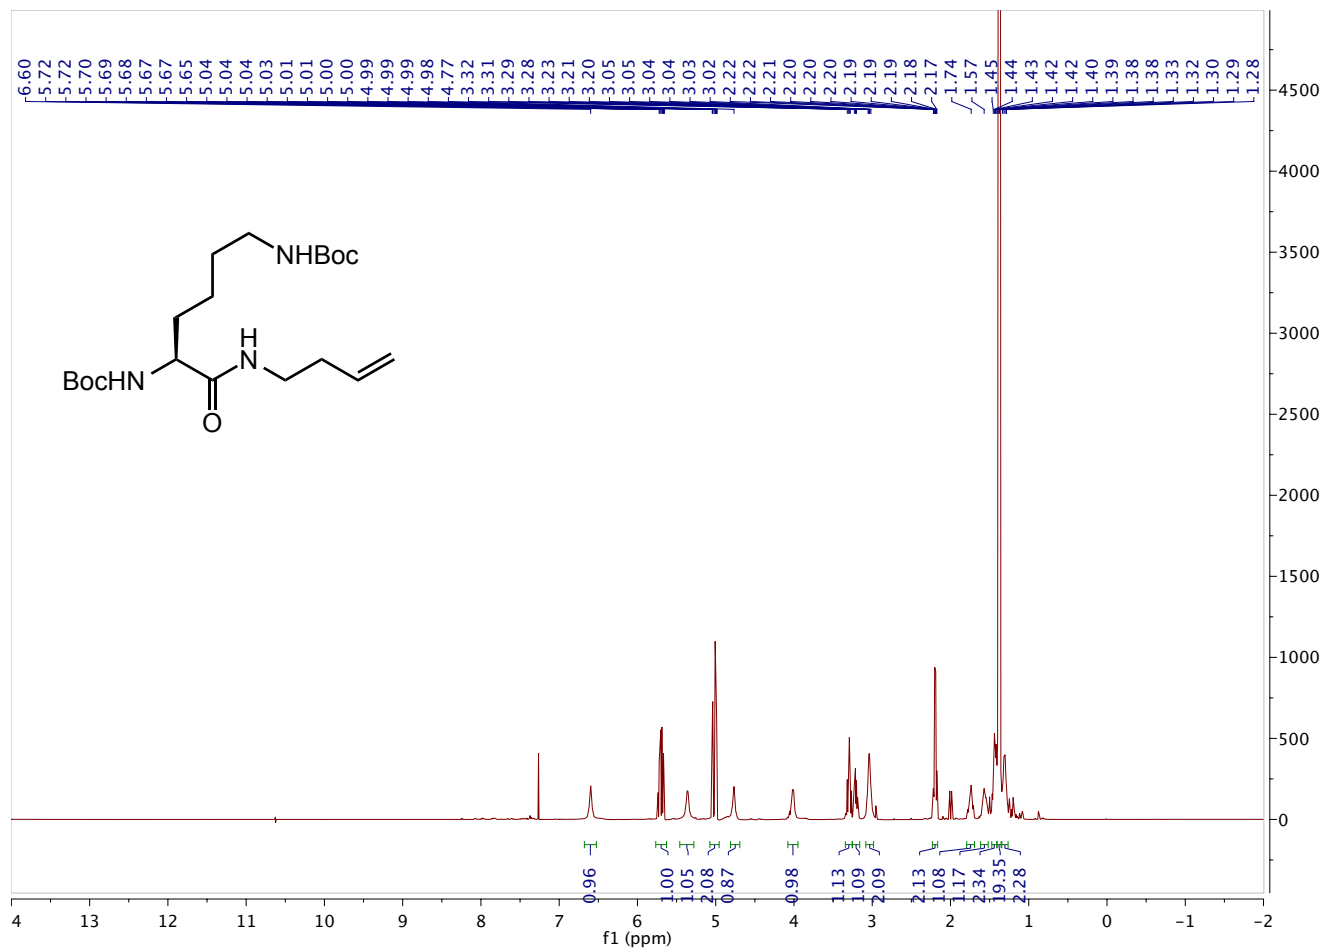

$^{13}\text{C}$  NMR (126 MHz,  $\text{CDCl}_3$ ) spectrum of compound **5r**

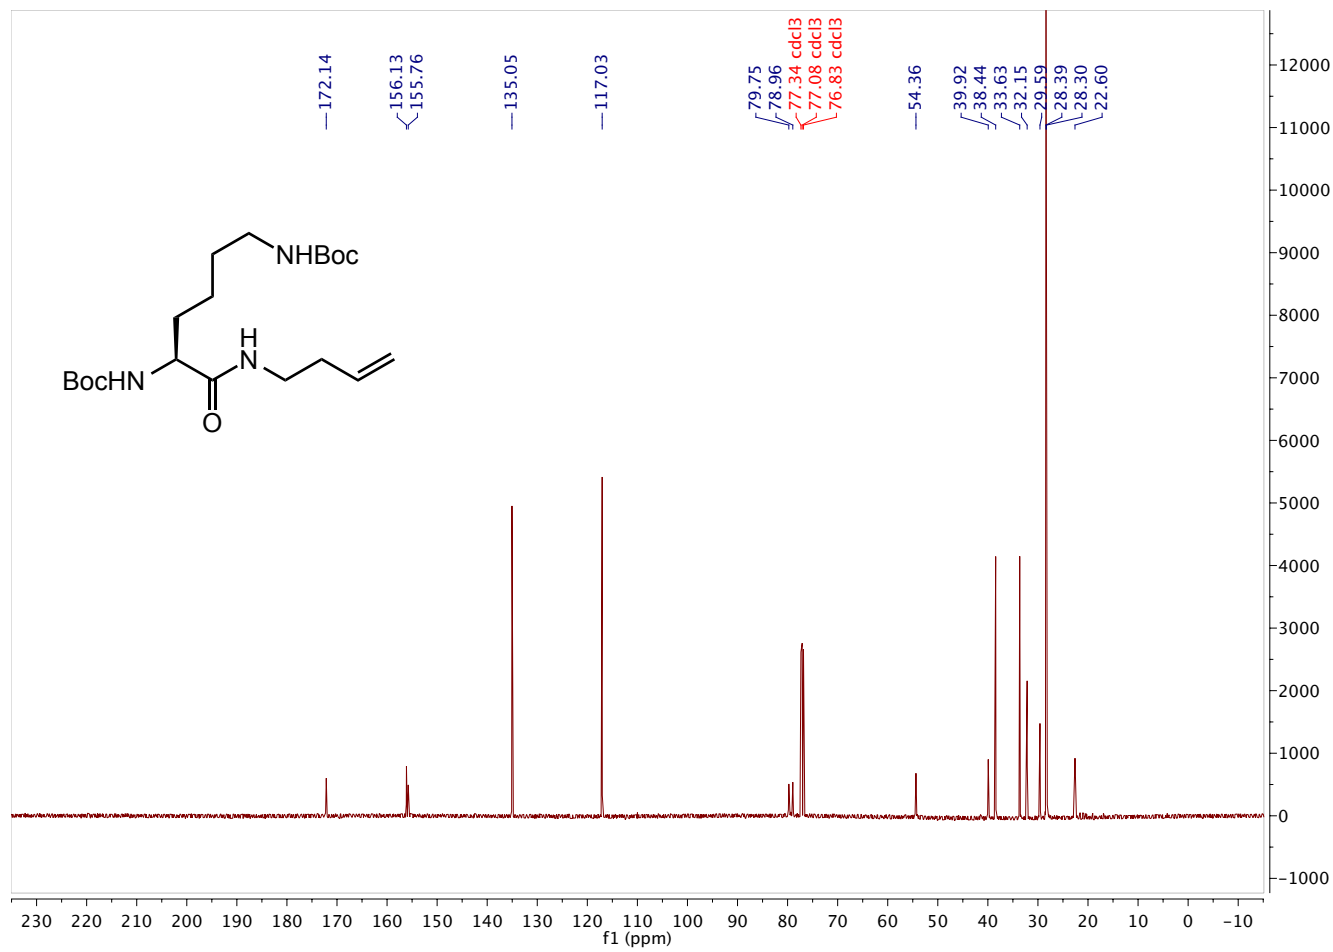

<sup>1</sup>H NMR (500 MHz, CDCl<sub>3</sub>) spectrum of compound **5s**

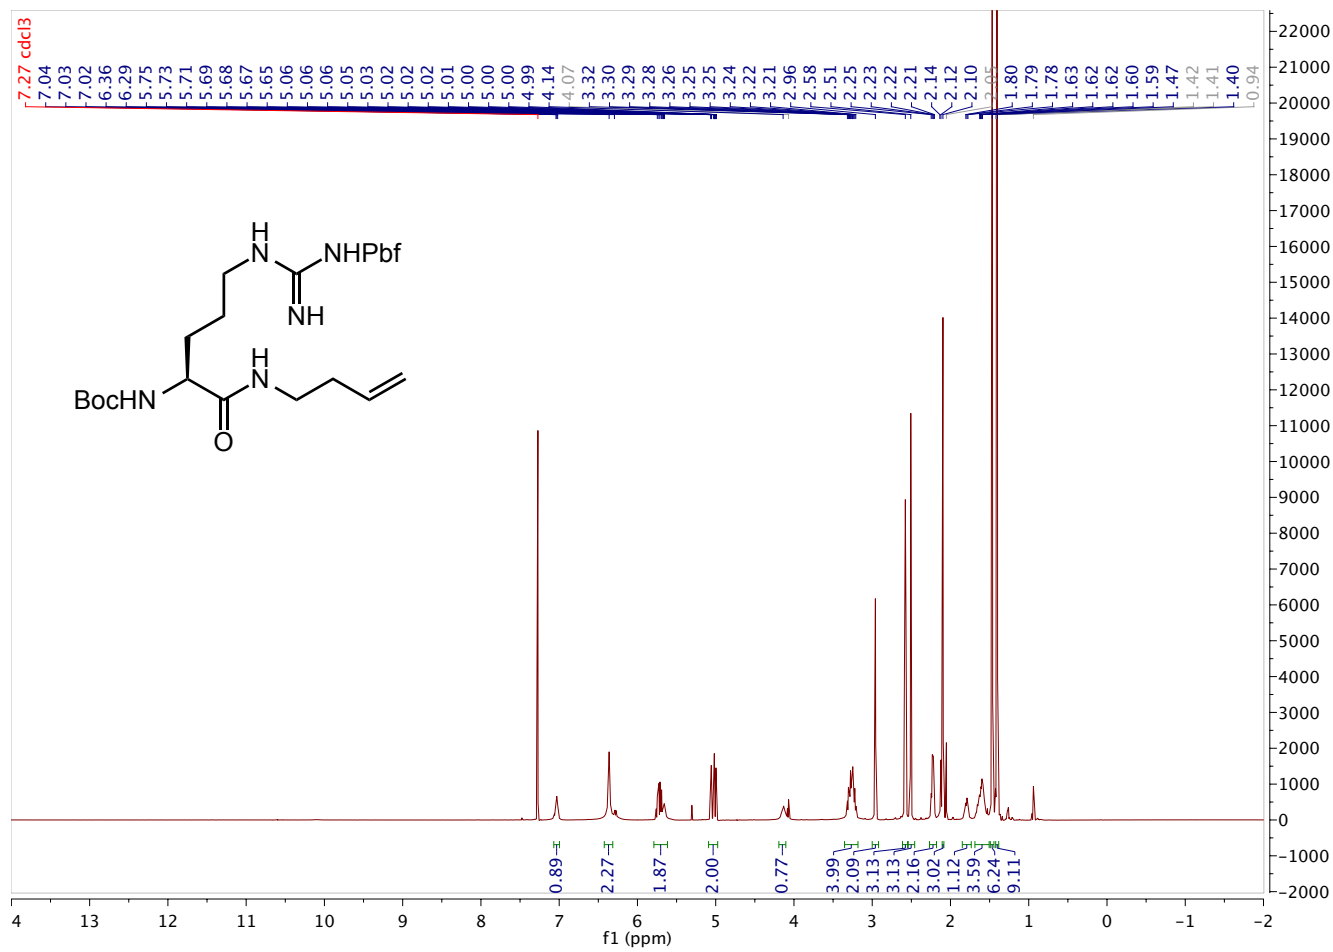

$^{13}\text{C}$  NMR (126 MHz,  $\text{CDCl}_3$ ) spectrum of compound **5s**

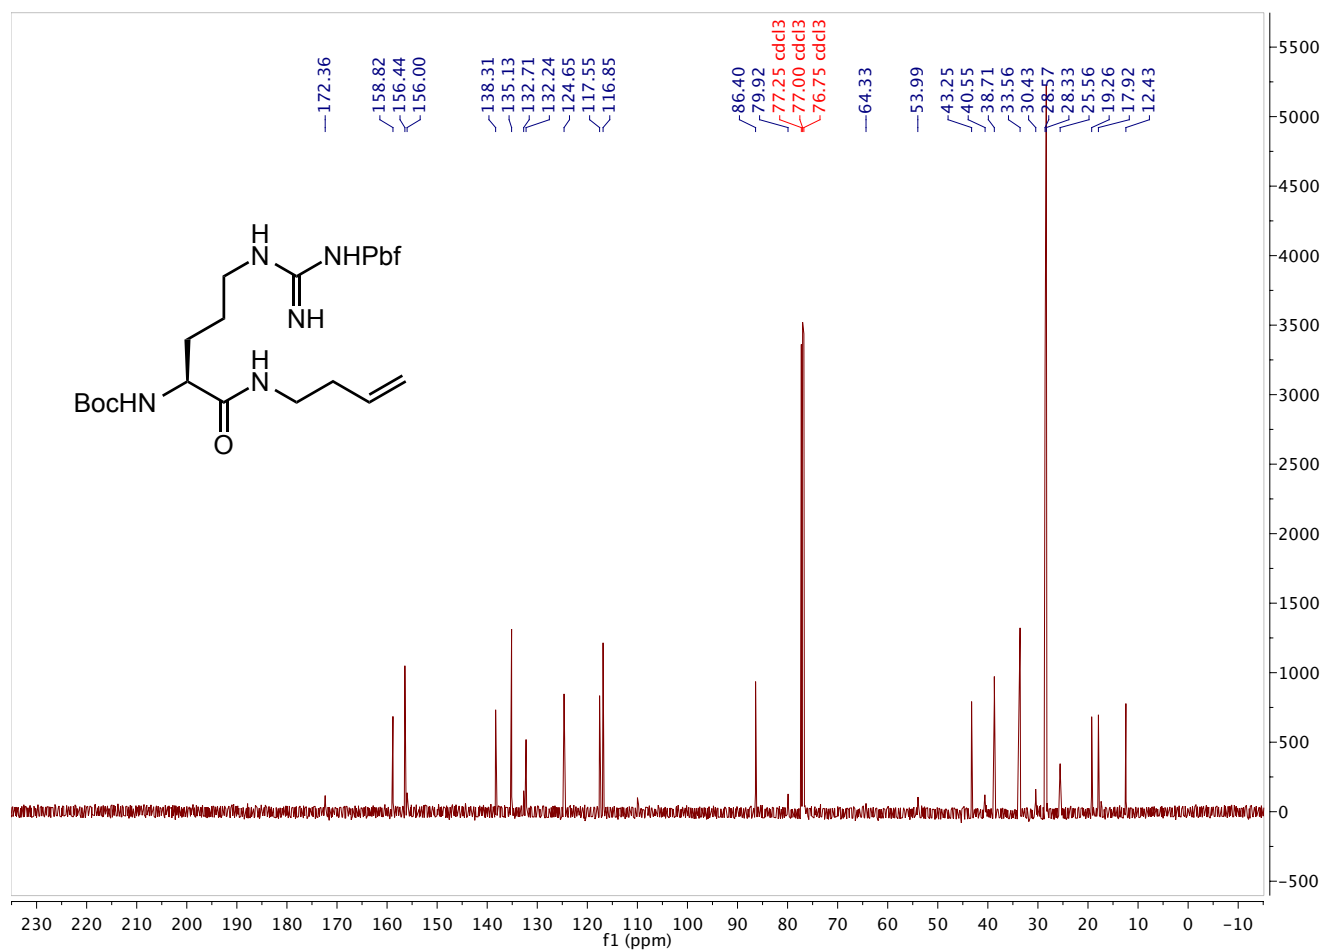

$^1\text{H}$  NMR (500 MHz,  $\text{CDCl}_3$ ) spectrum of compound 4

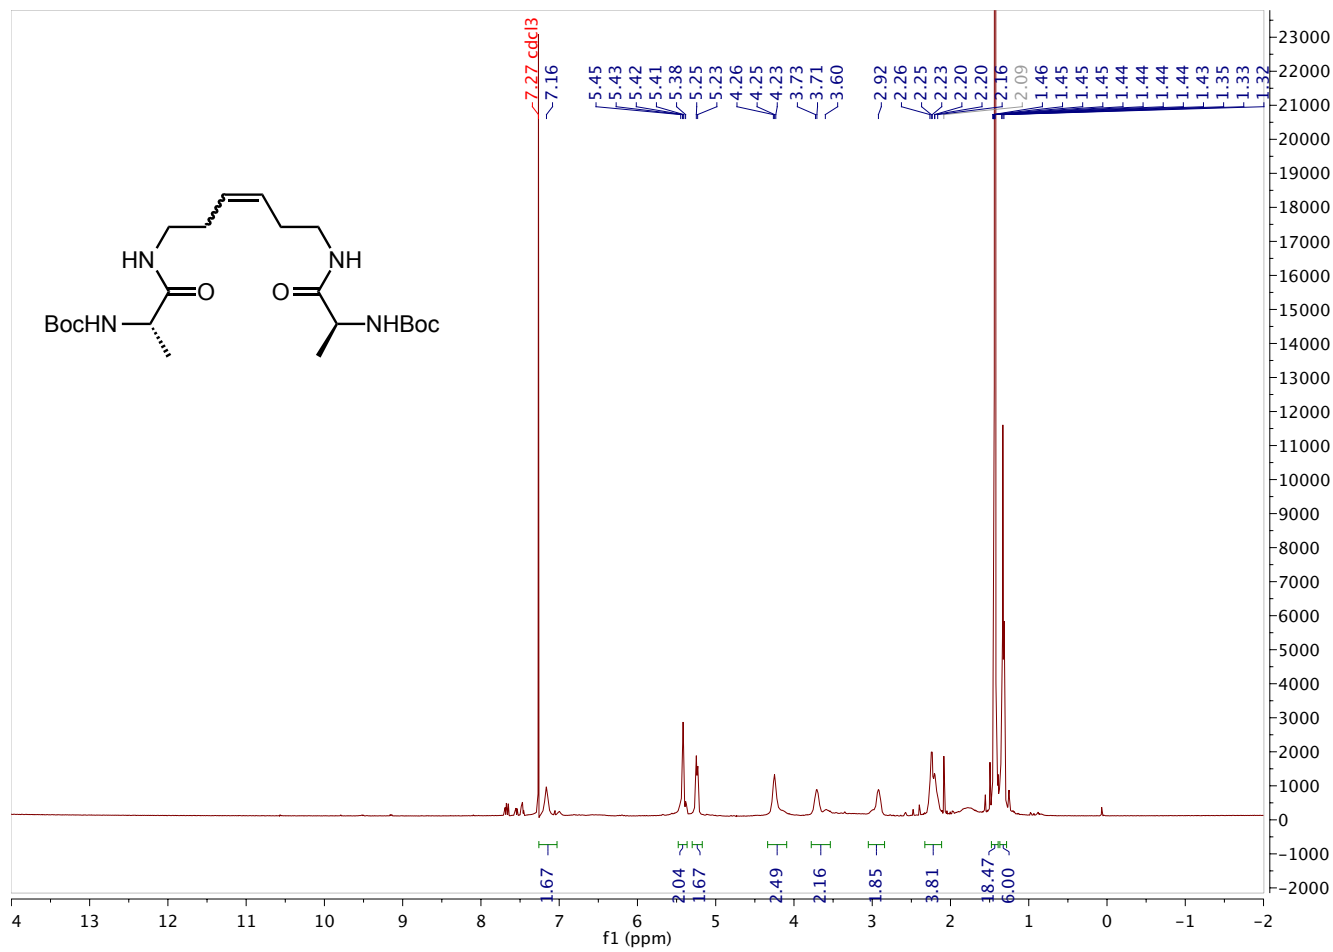

$^{13}\text{C}$  NMR (126 MHz,  $\text{CDCl}_3$ ) spectrum of compound **4**

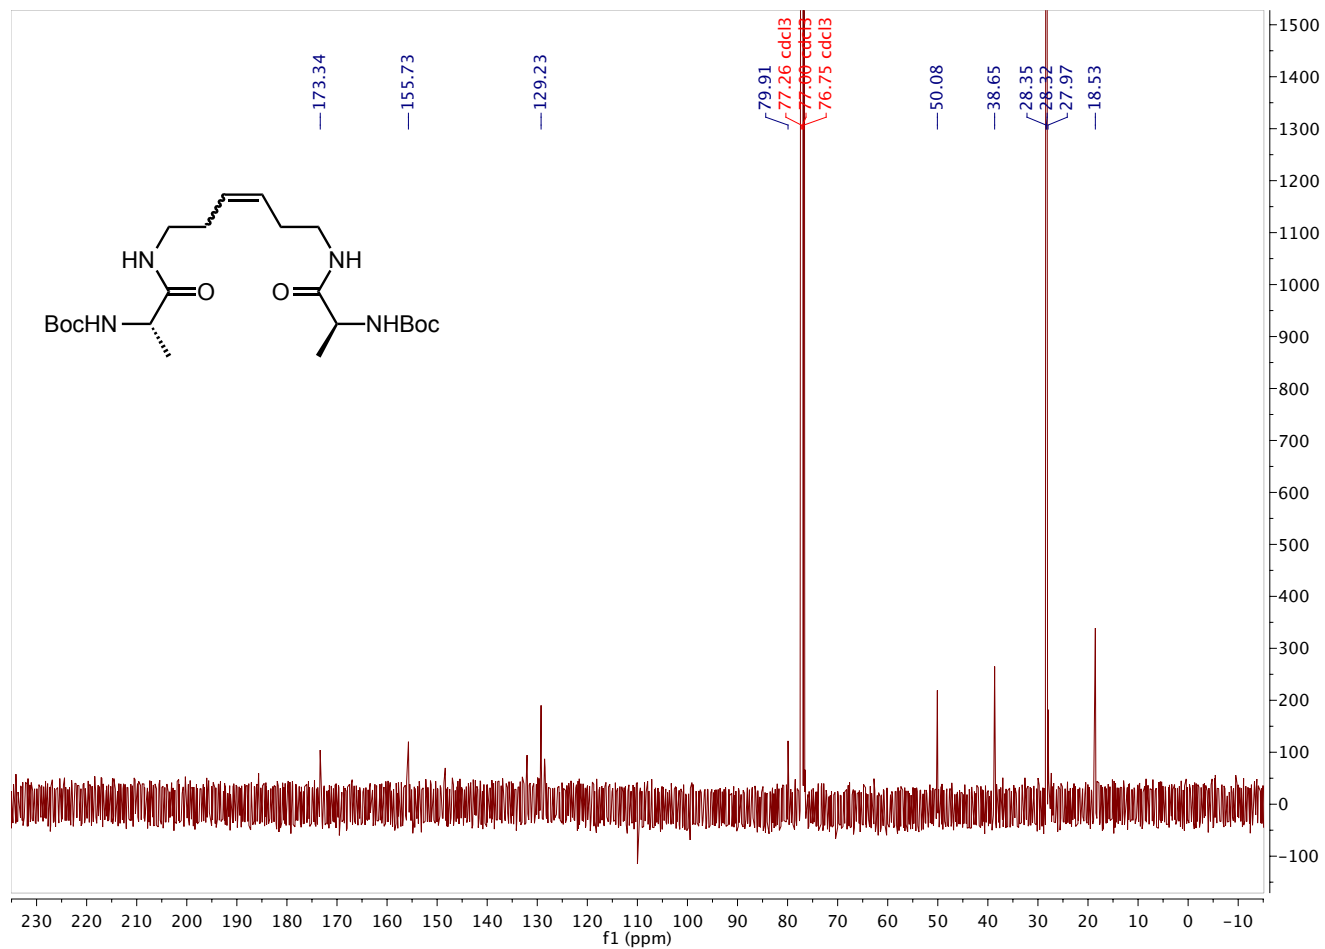



$^1\text{H}$  NMR (500 MHz,  $\text{CDCl}_3$ ) spectrum of compound **6a**

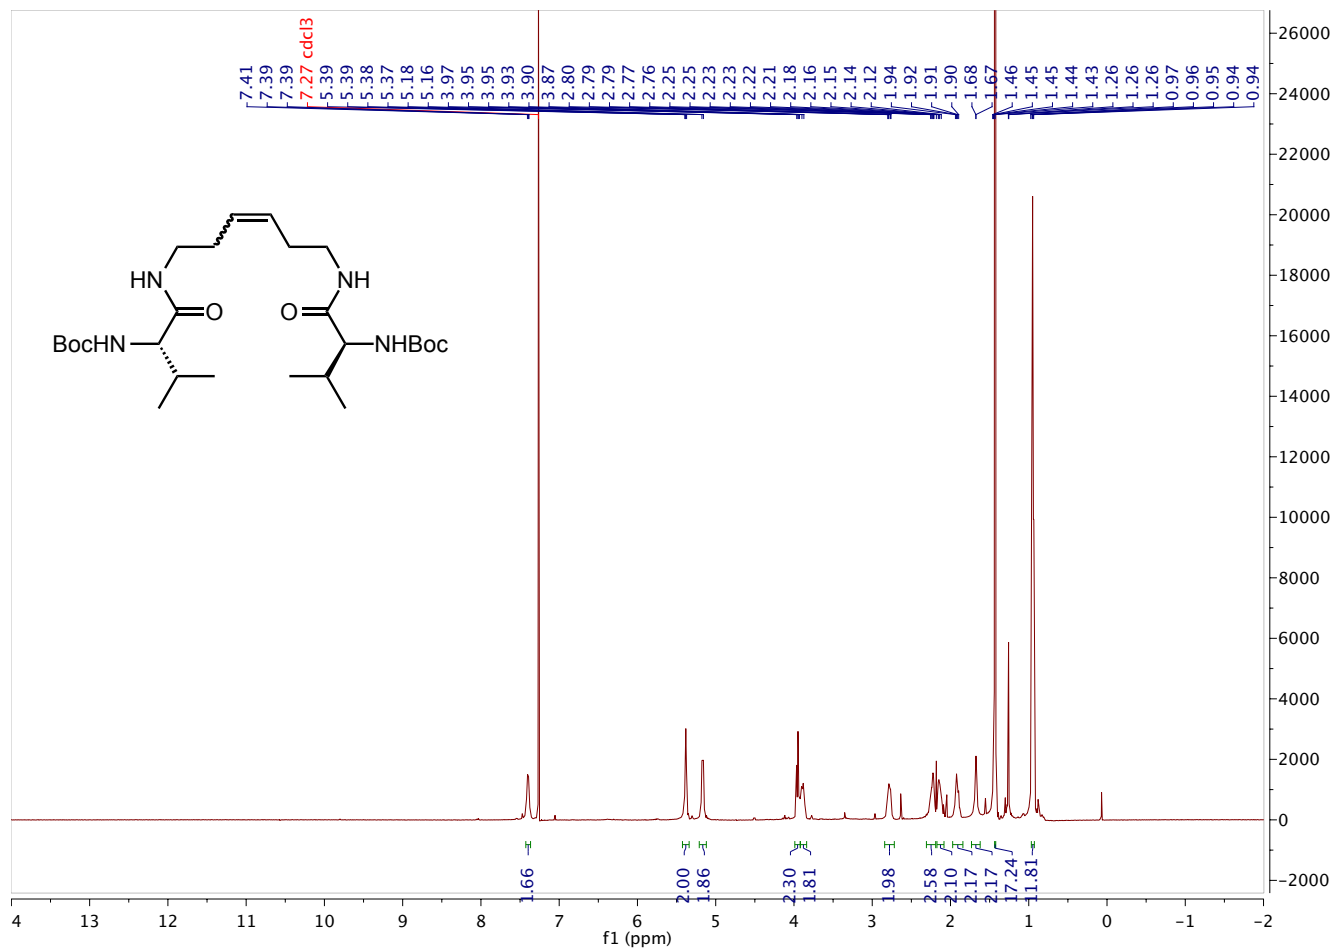

$^{13}\text{C}$  NMR (126 MHz,  $\text{CDCl}_3$ ) spectrum of compound **6a**

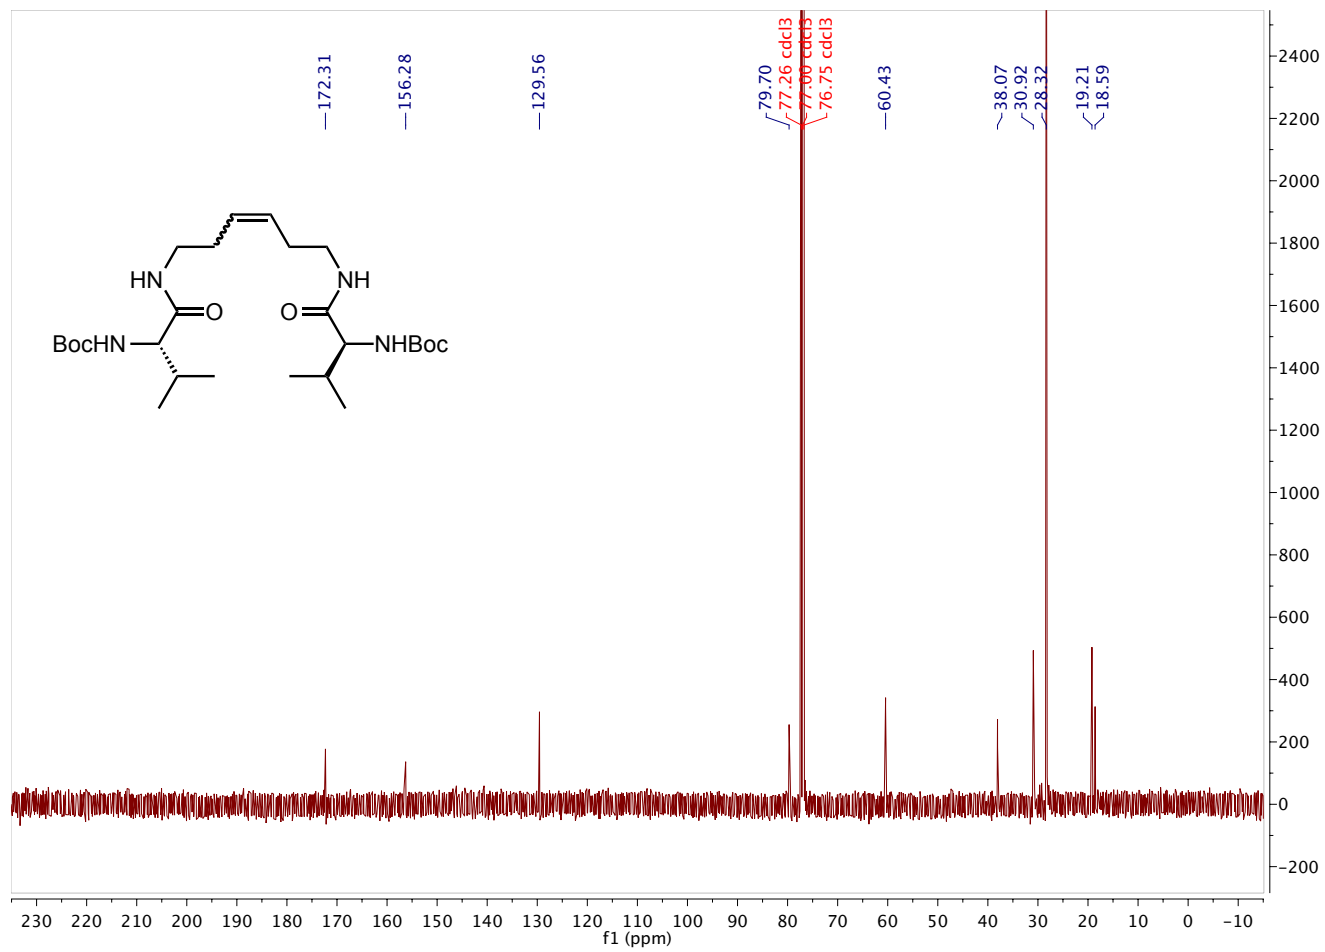

$^1\text{H}$  NMR (500 MHz,  $\text{CDCl}_3$ ) spectrum of compound **6b**

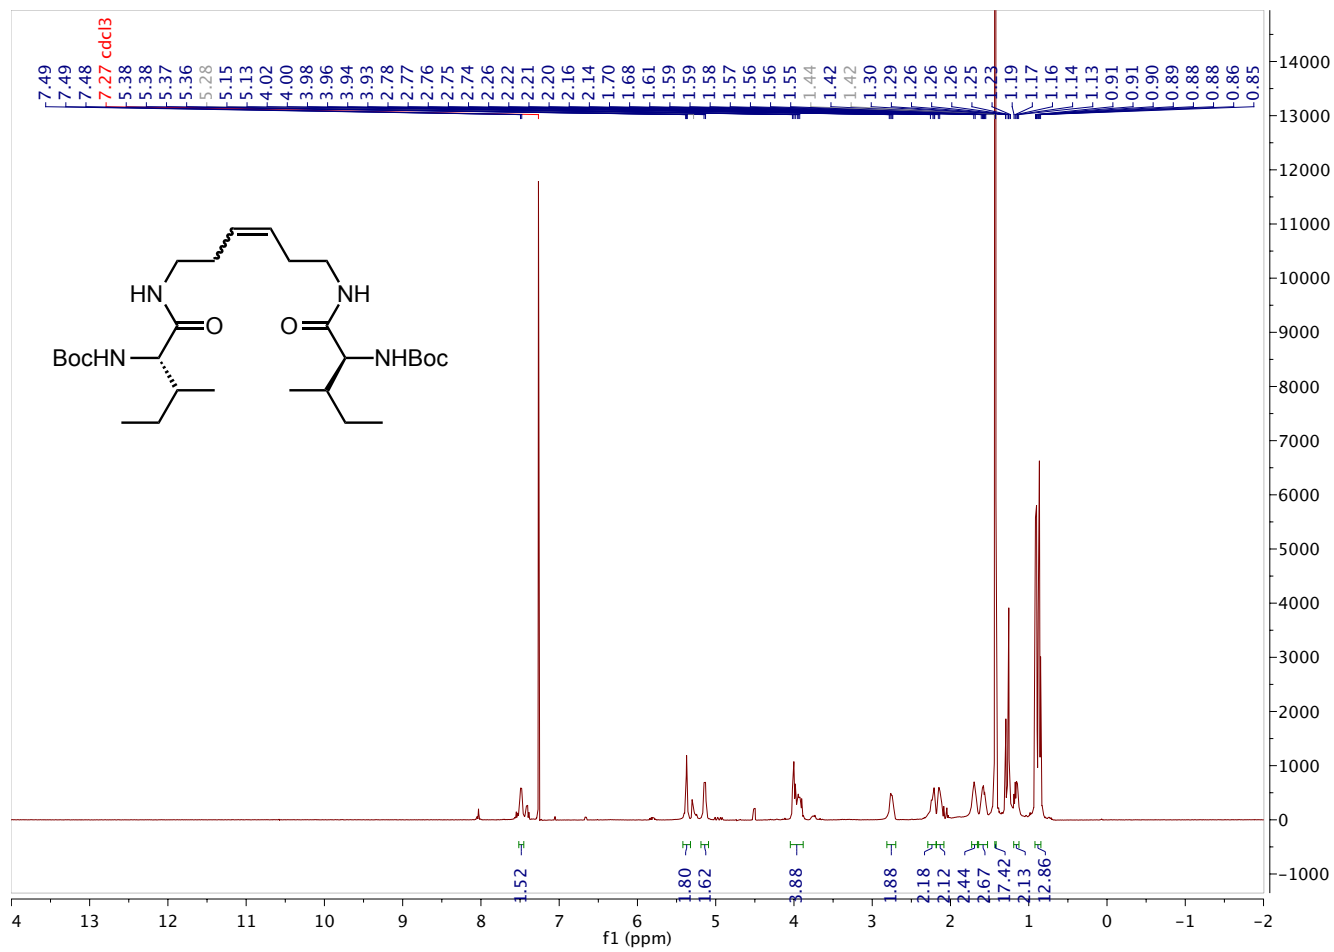

$^{13}\text{C}$  NMR (126 MHz,  $\text{CDCl}_3$ ) spectrum of compound **6b**

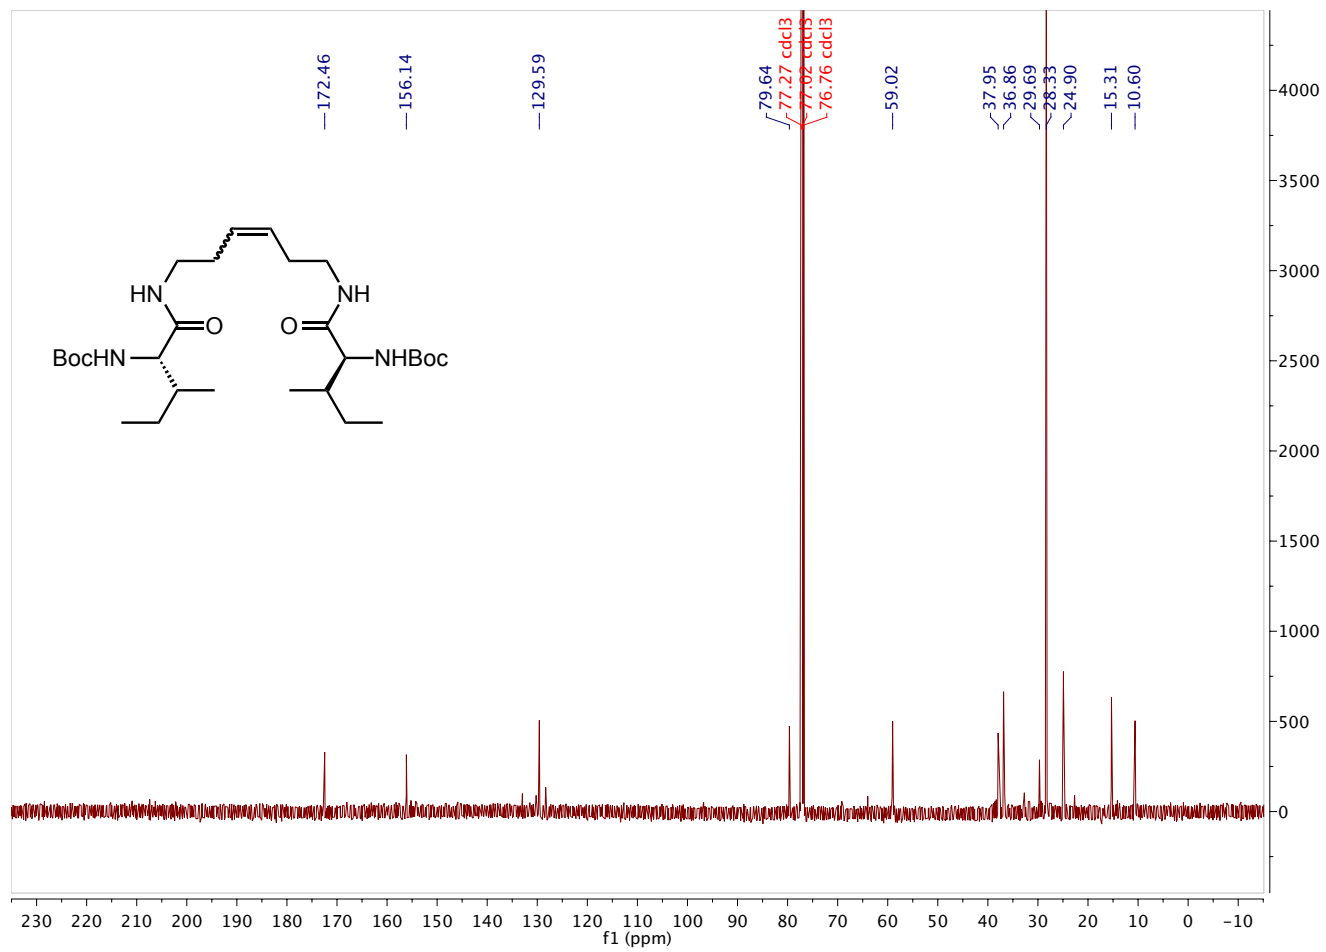

<sup>1</sup>H NMR (500 MHz, CDCl<sub>3</sub>) spectrum of compound **6c**

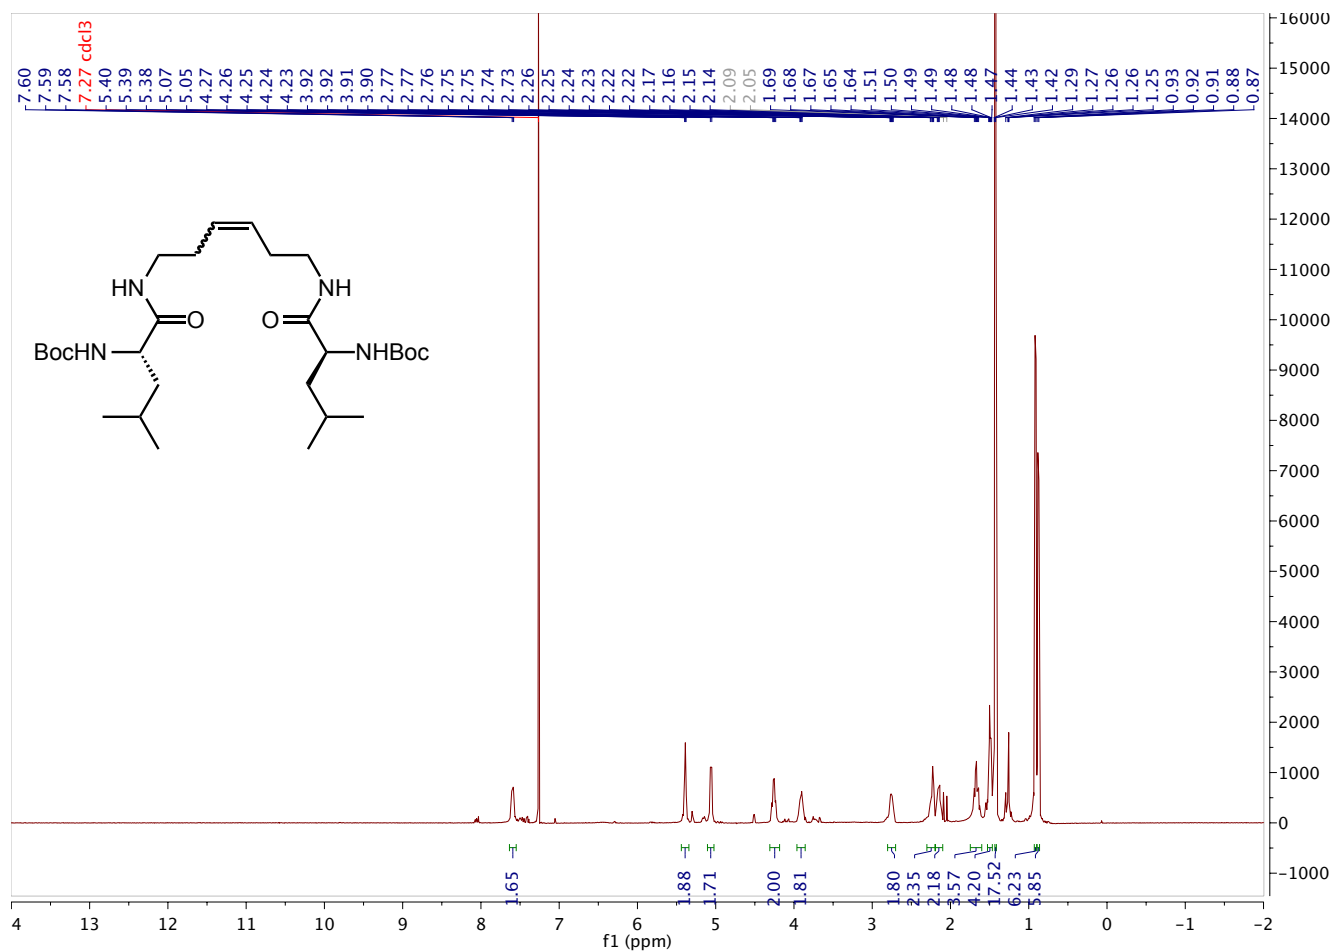

$^{13}\text{C}$  NMR (126 MHz,  $\text{CDCl}_3$ ) spectrum of compound **6c**

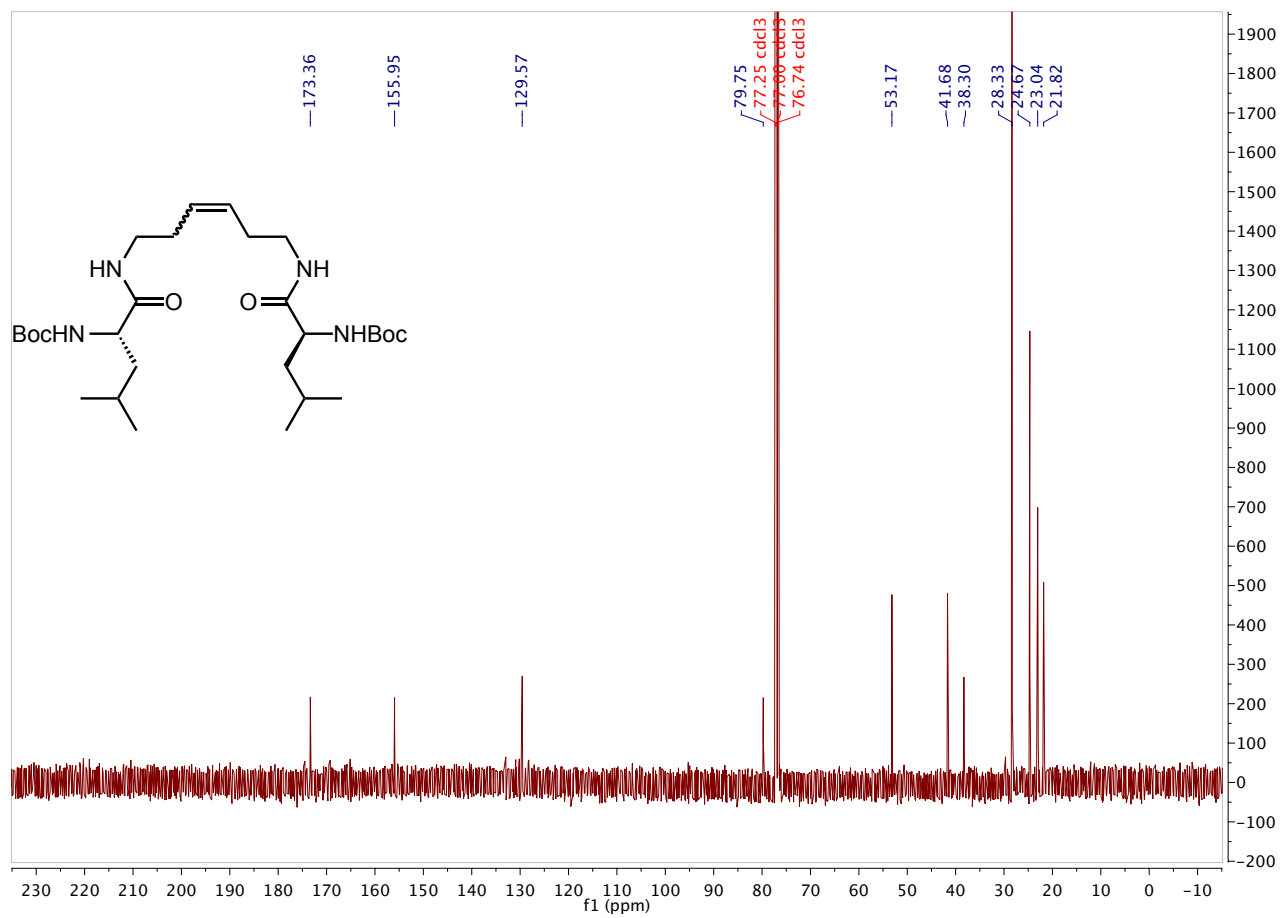

$^1\text{H}$  NMR (500 MHz,  $\text{CDCl}_3$ ) spectrum of compound **6d**

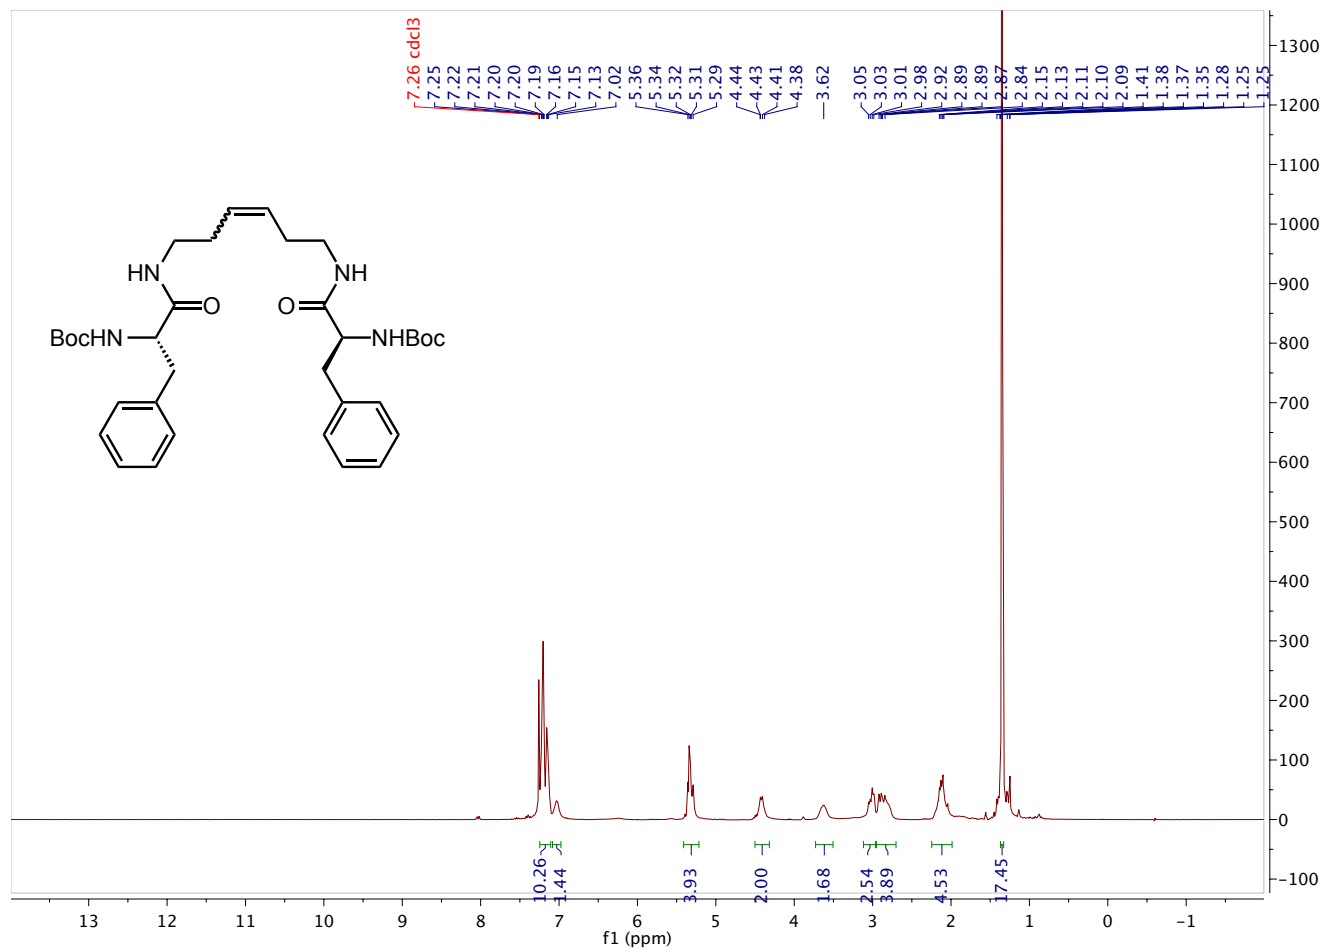

$^{13}\text{C}$  NMR (126 MHz,  $\text{CDCl}_3$ ) spectrum of compound **6d**

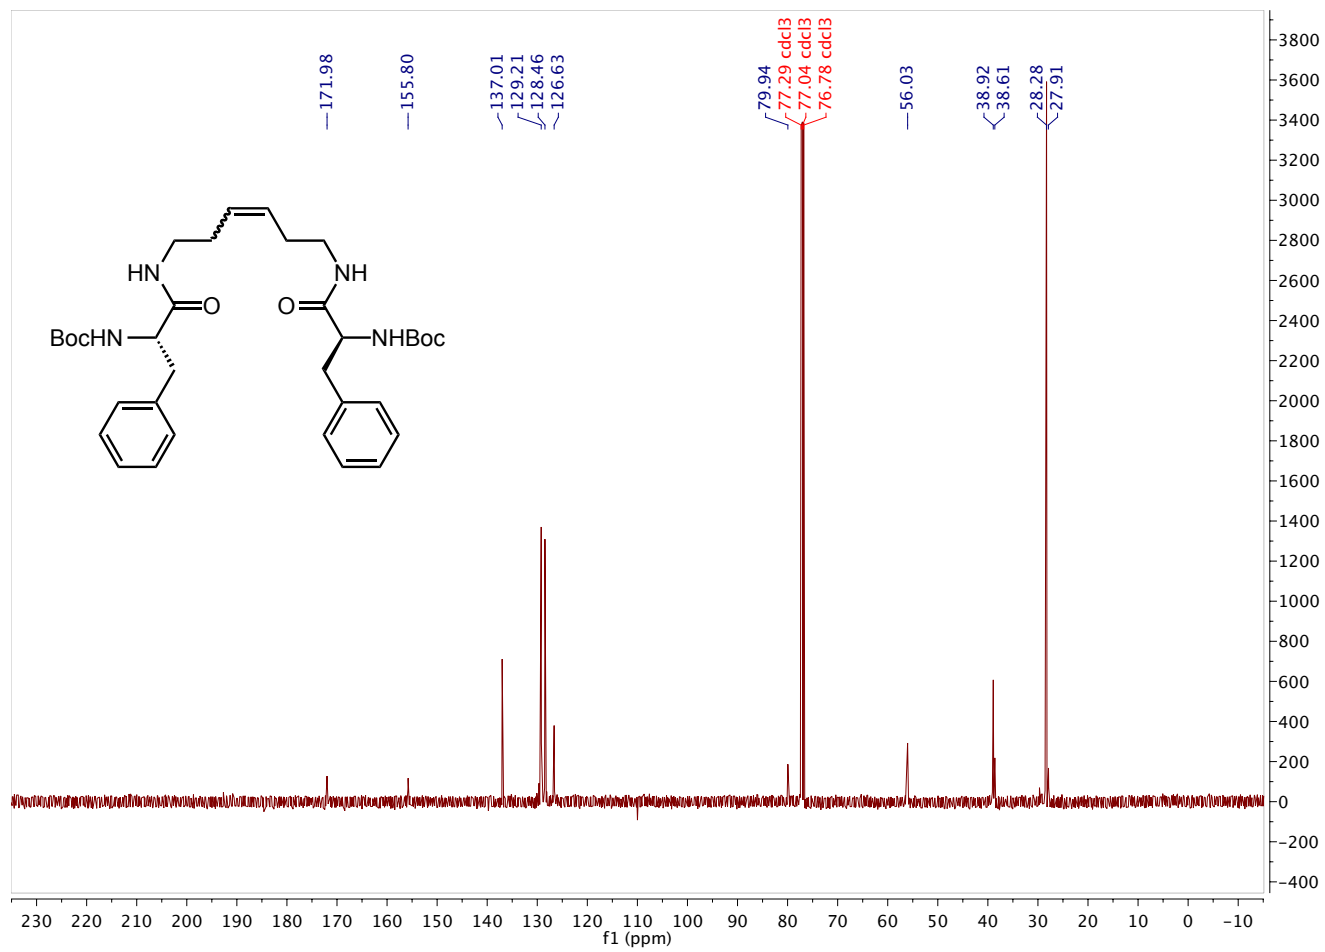



$^1\text{H}$  NMR (500 MHz,  $\text{CDCl}_3$ ) spectrum of compound **6g**

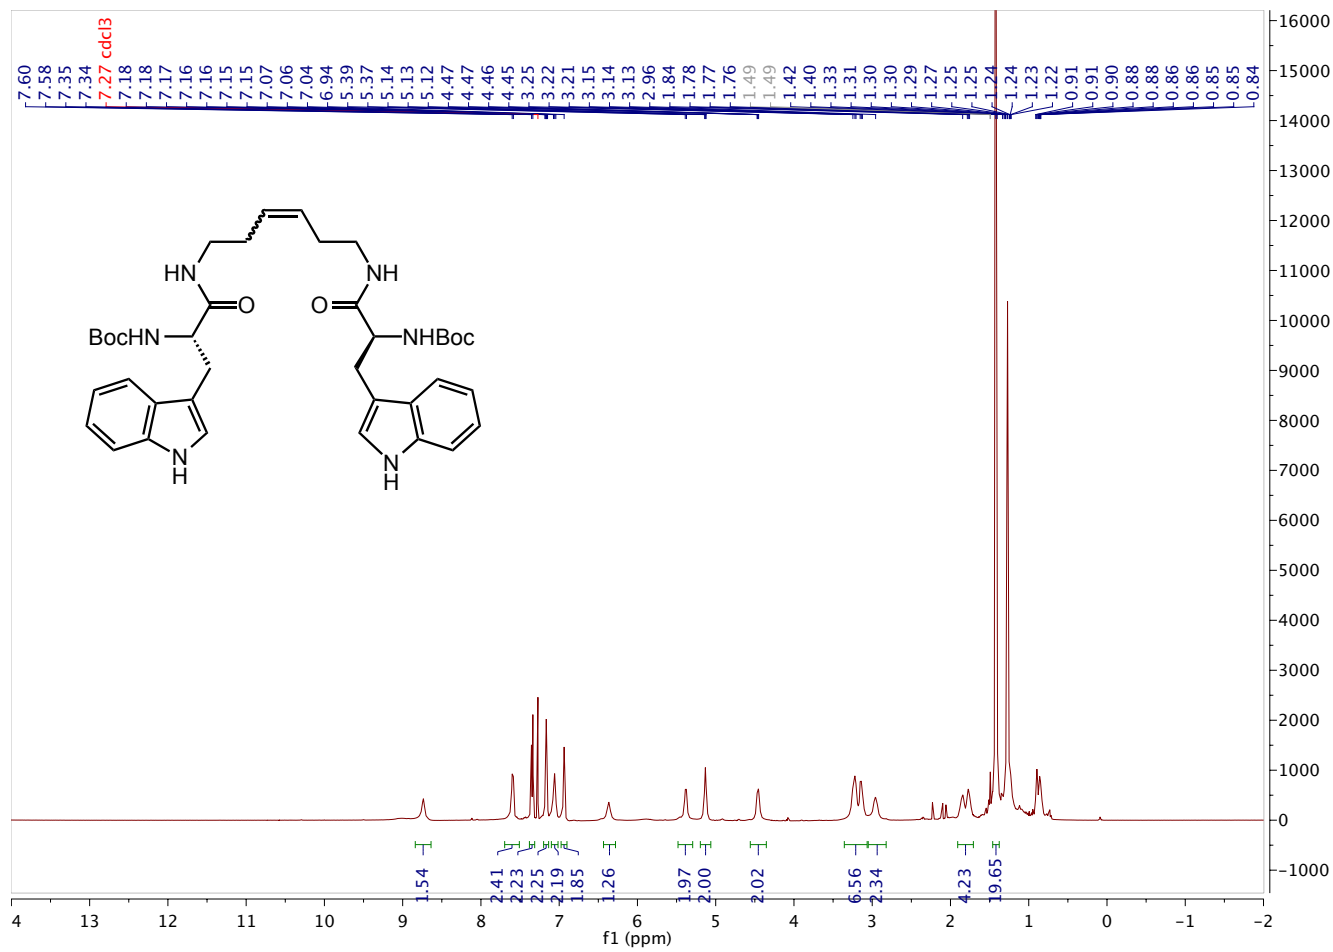

$^{13}\text{C}$  NMR (126 MHz,  $\text{CDCl}_3$ ) spectrum of compound **6g**

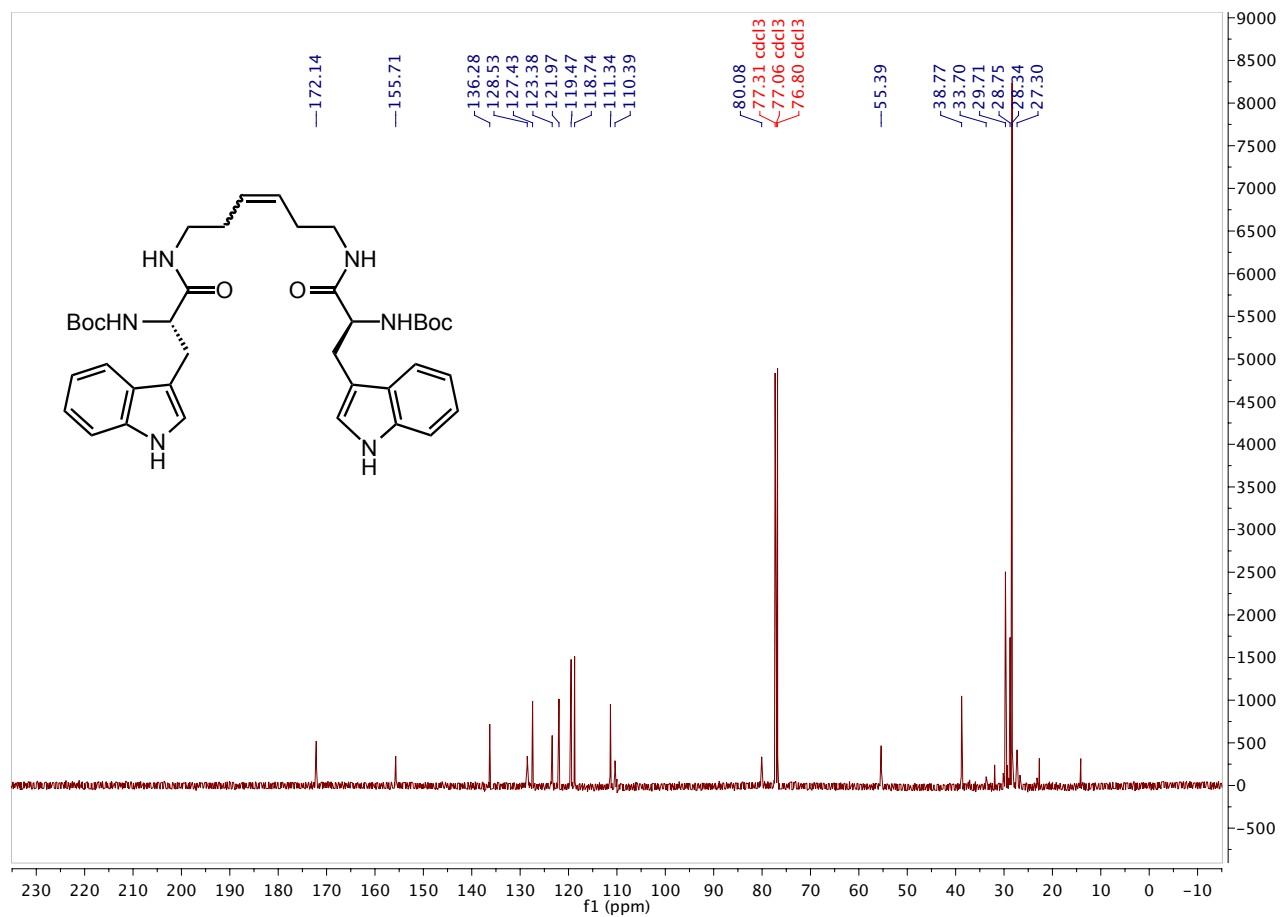

$^1\text{H}$  NMR (500 MHz,  $\text{CDCl}_3$ ) spectrum of compound **6i**

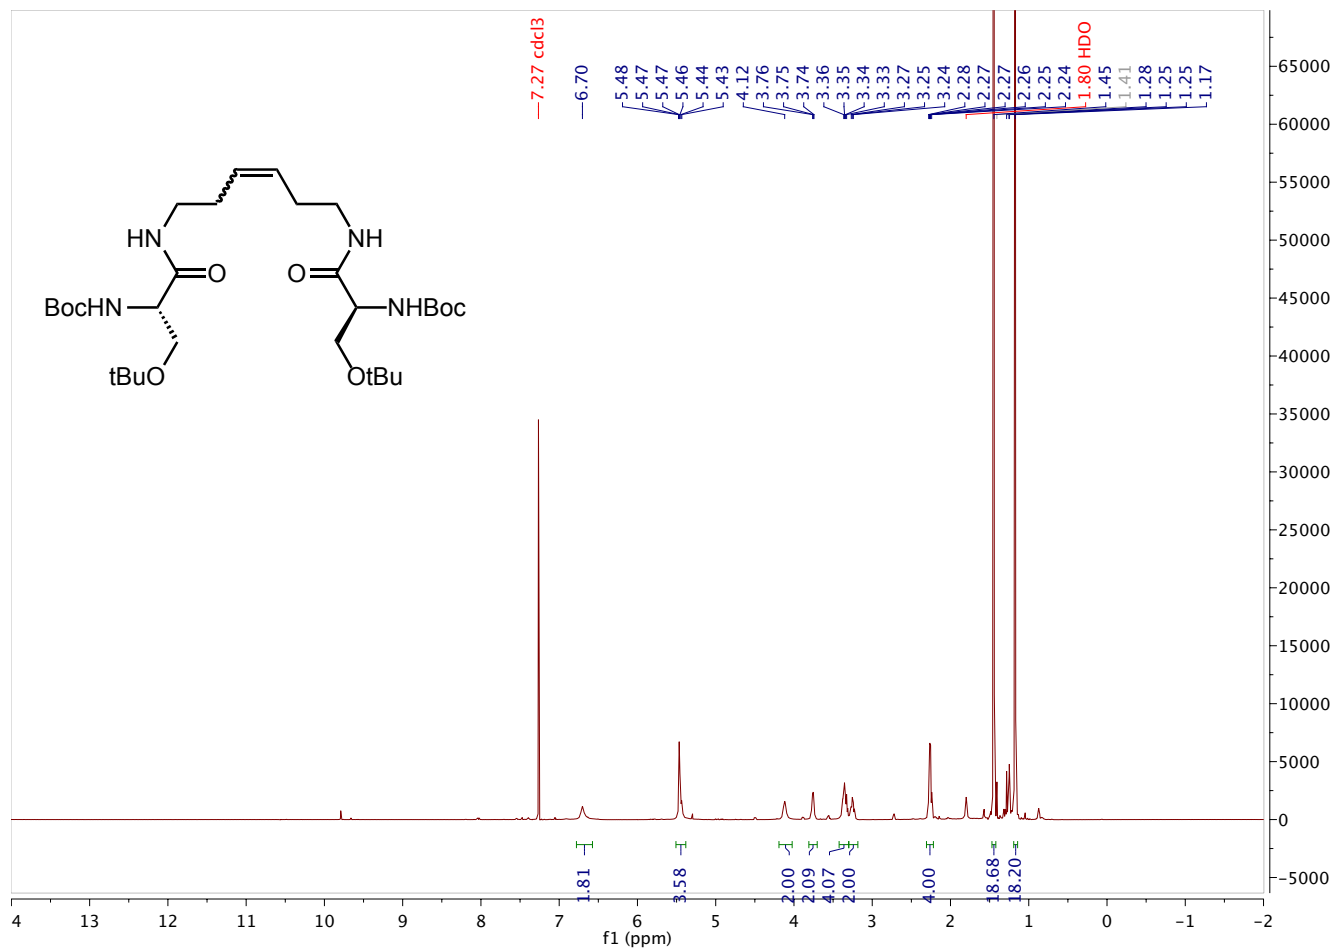

$^{13}\text{C}$  NMR (126 MHz,  $\text{CDCl}_3$ ) spectrum of compound **6i**

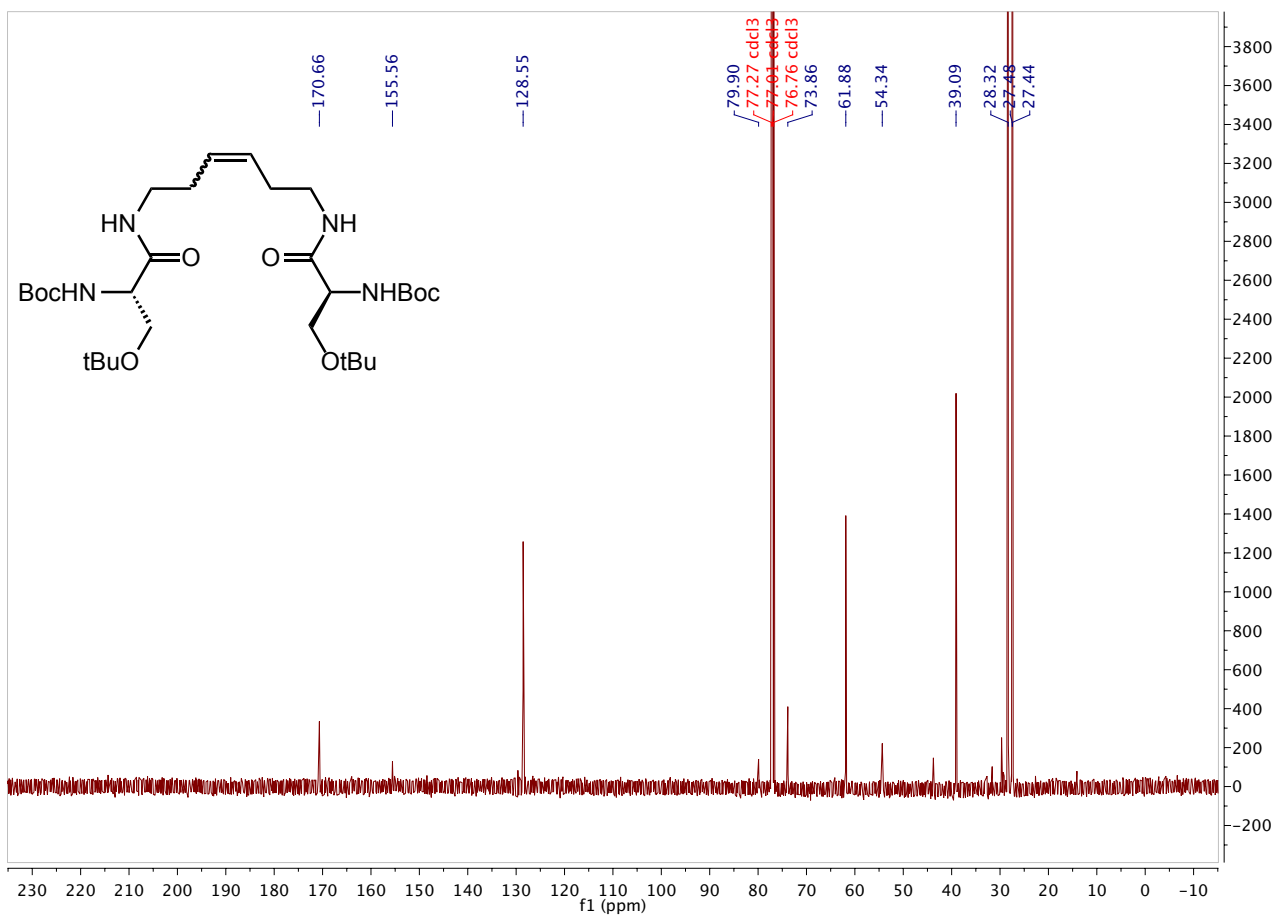

$^1\text{H}$  NMR (500 MHz,  $\text{CDCl}_3$ ) spectrum of compound **6j**

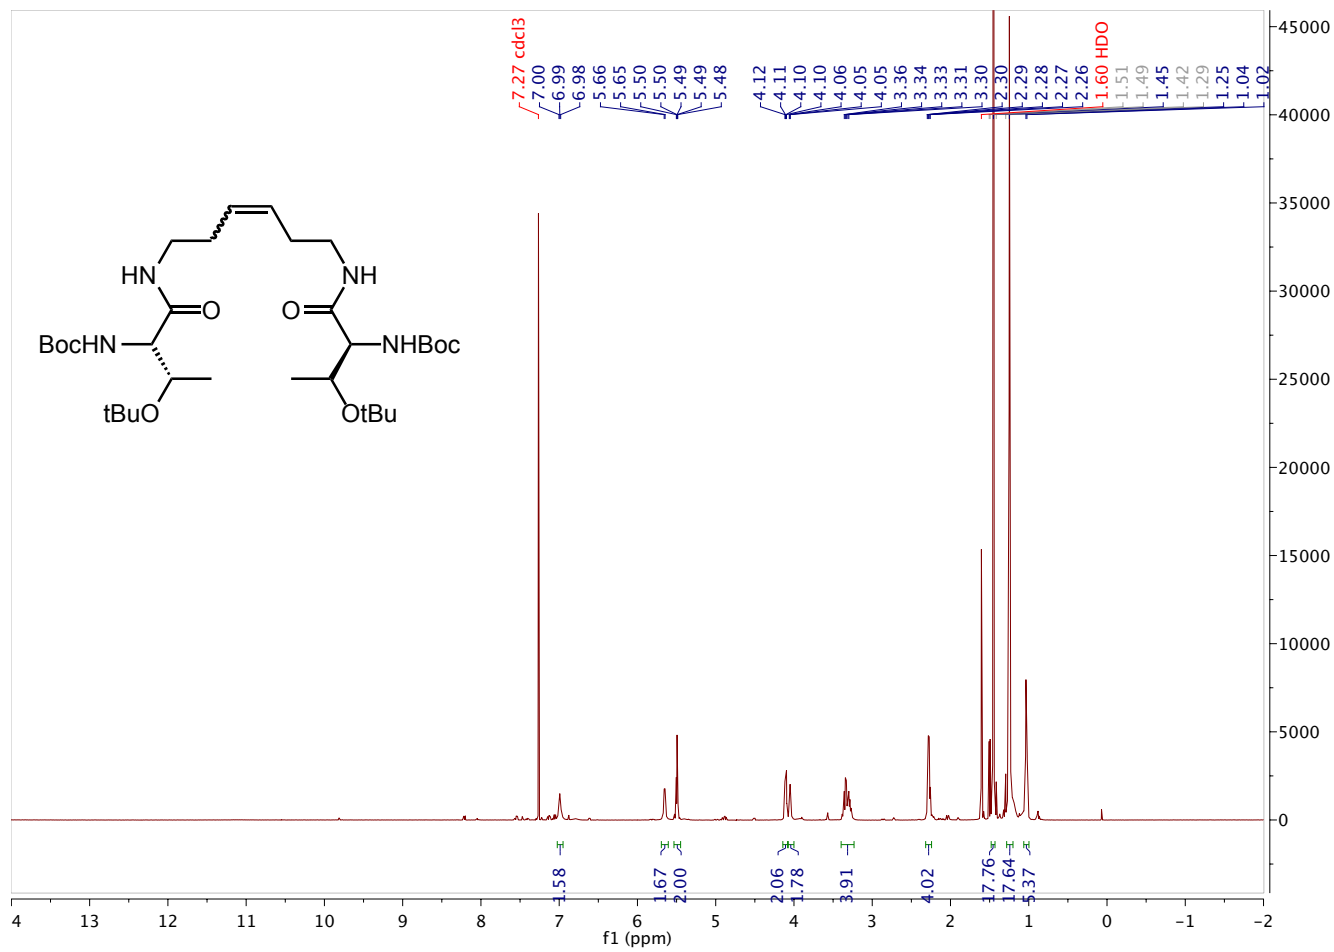

<sup>13</sup>C NMR (126 MHz, CDCl<sub>3</sub>) spectrum of compound **6j**

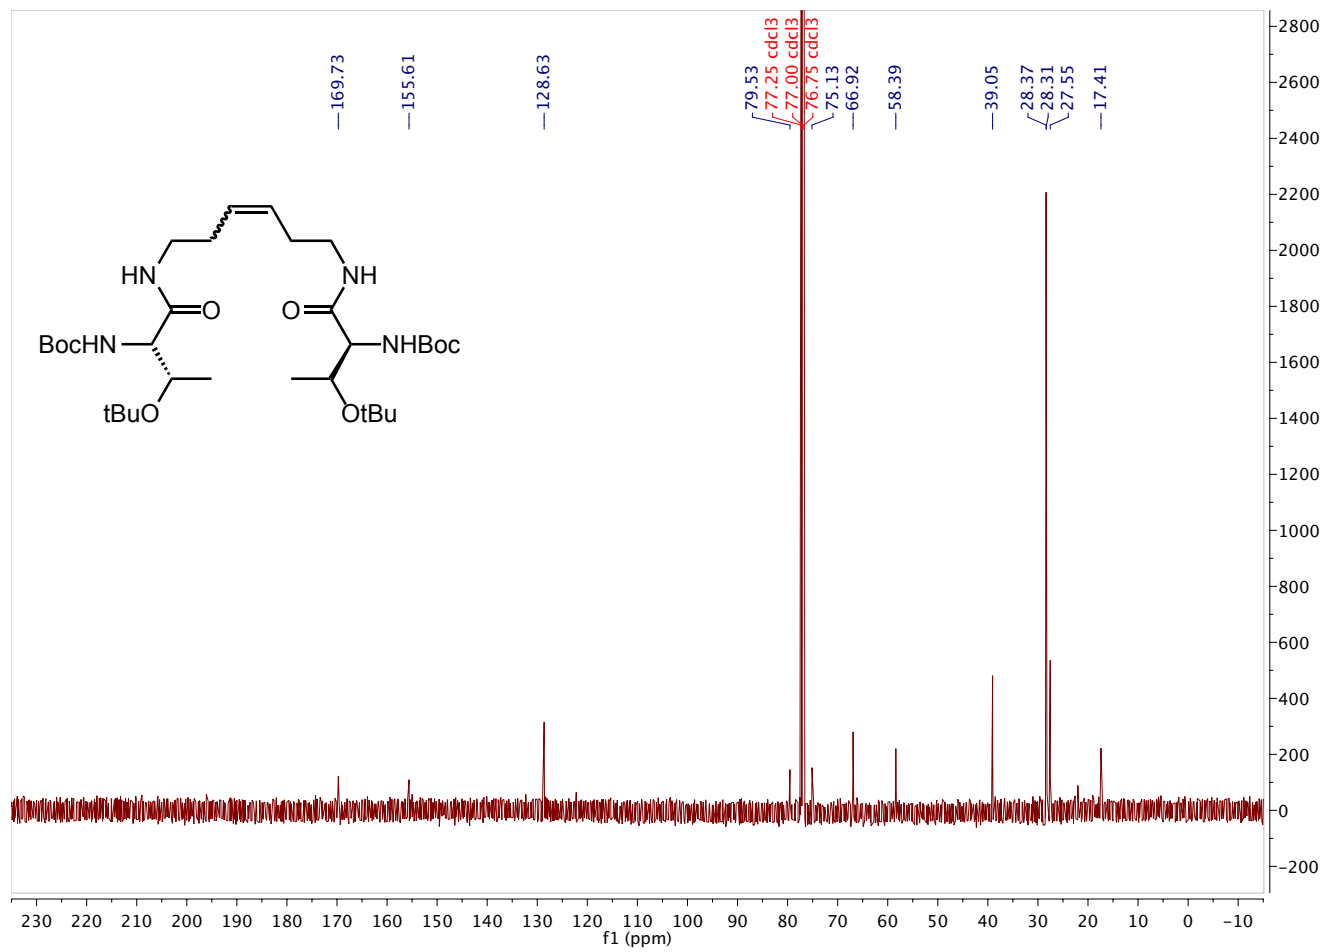

<sup>1</sup>H NMR (500 MHz, CDCl<sub>3</sub>) spectrum of compound **6k**

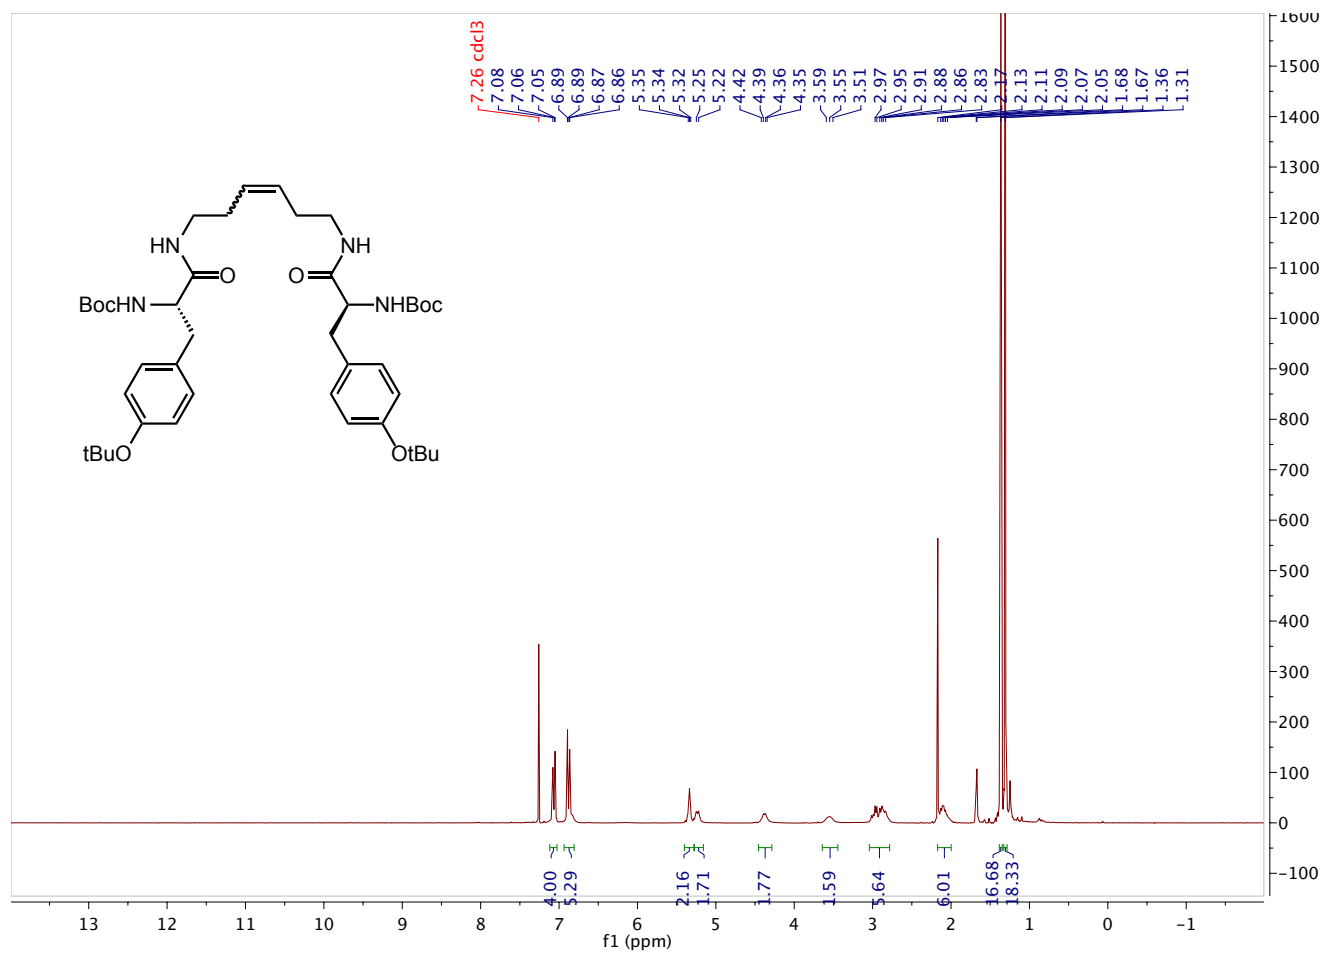

$^{13}\text{C}$  NMR (126 MHz,  $\text{CDCl}_3$ ) spectrum of compound **6k**

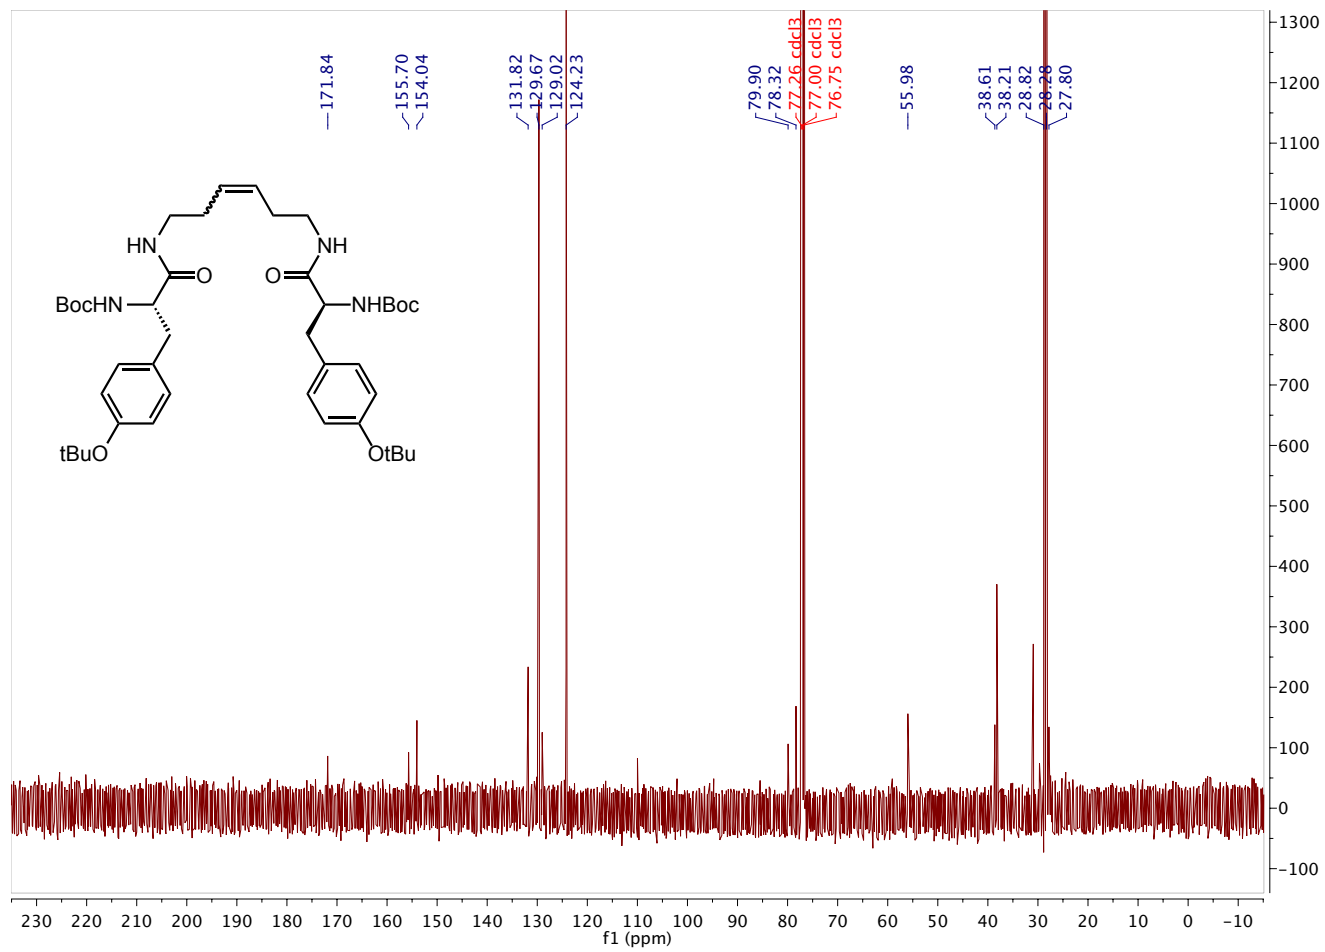



$^1\text{H}$  NMR (500 MHz,  $\text{CDCl}_3$ ) spectrum of compound **6m**

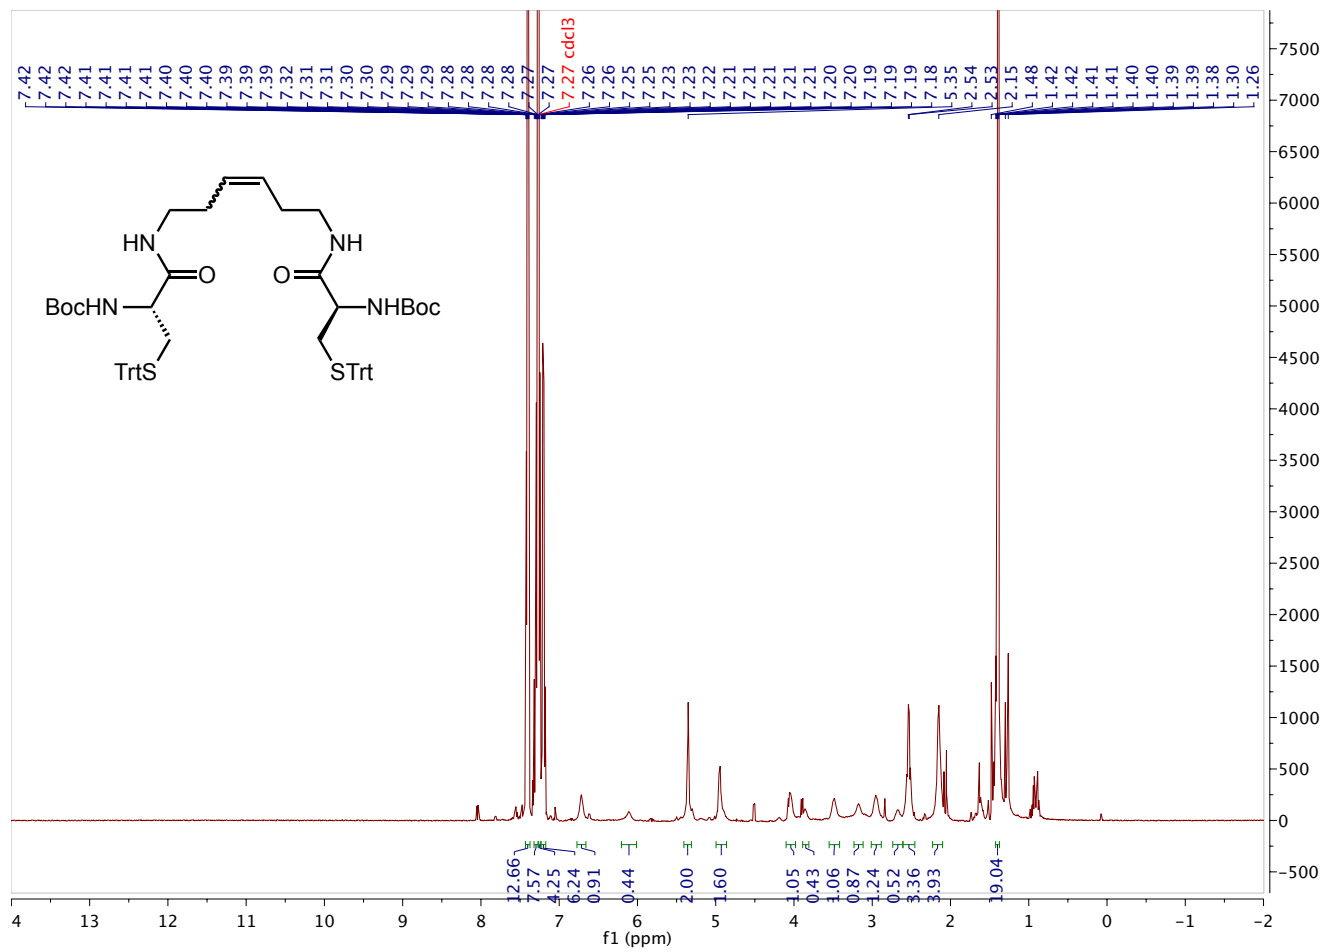

$^{13}\text{C}$  NMR (126 MHz,  $\text{CDCl}_3$ ) spectrum of compound **6m**

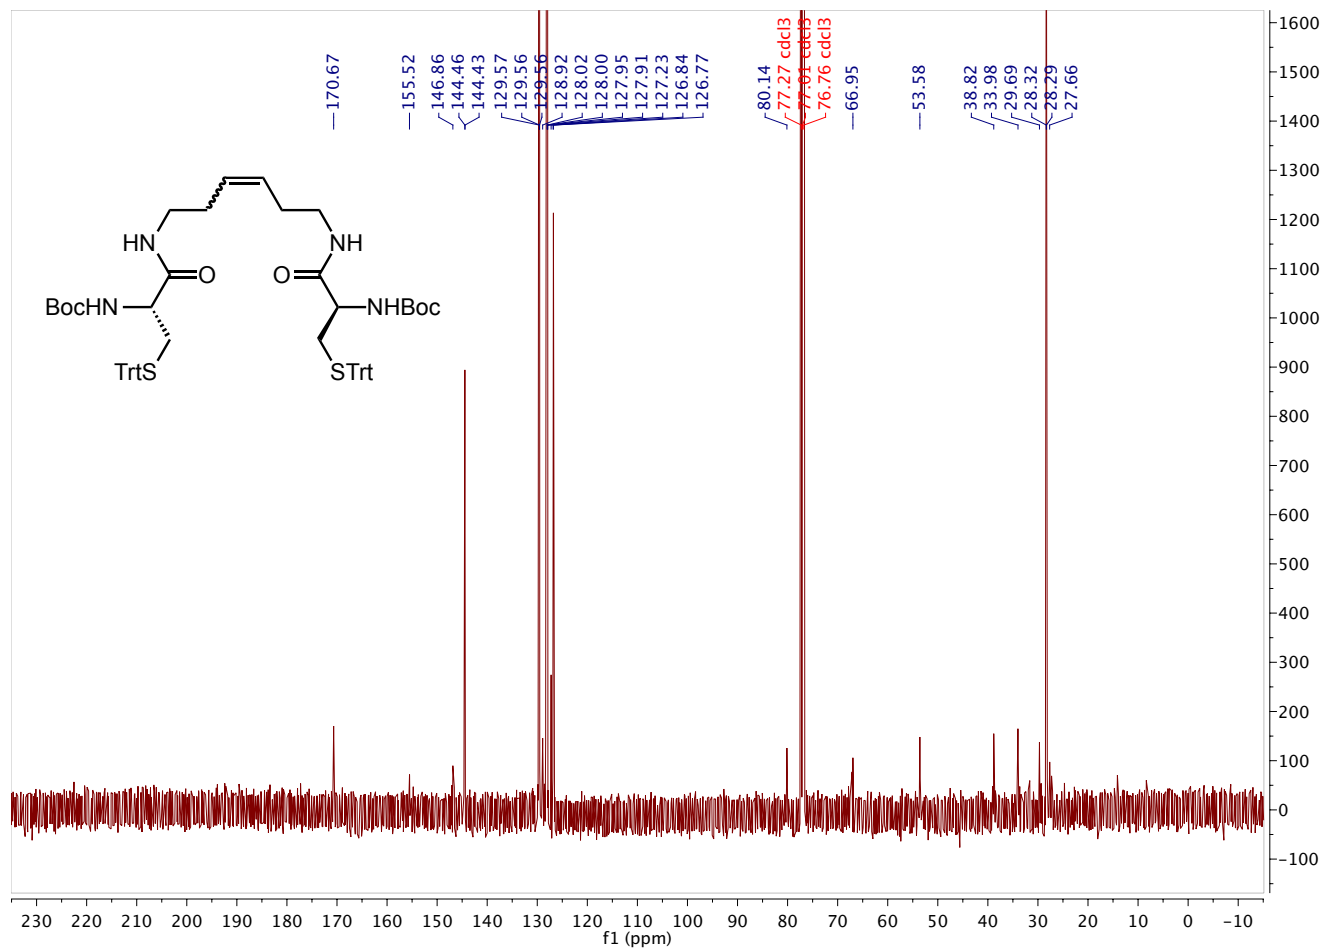

$^1\text{H}$  NMR (500 MHz,  $\text{CDCl}_3$ ) spectrum of compound **6n**

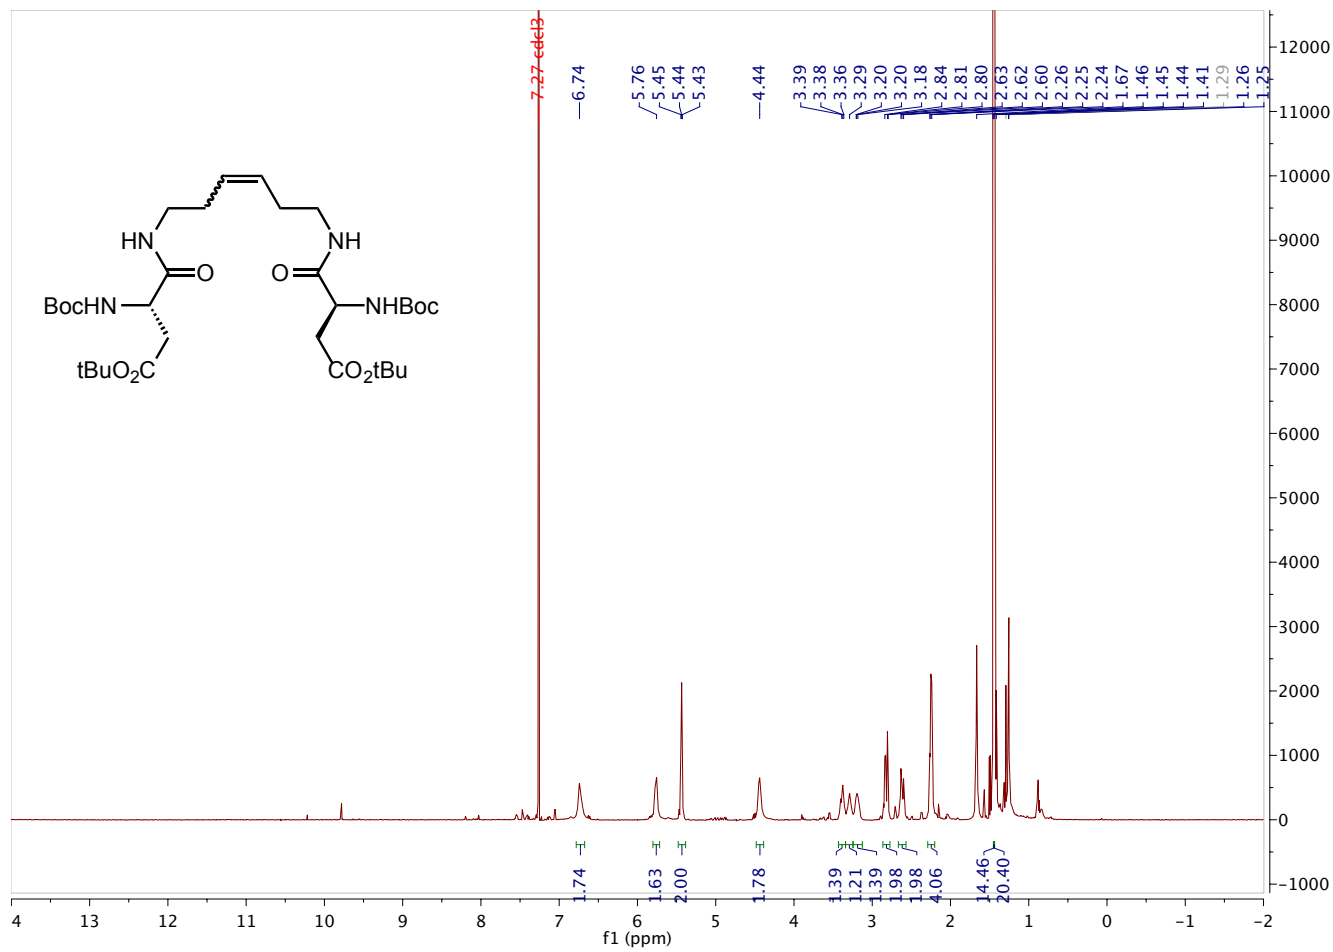

$^{13}\text{C}$  NMR (126 MHz,  $\text{CDCl}_3$ ) spectrum of compound **6n**

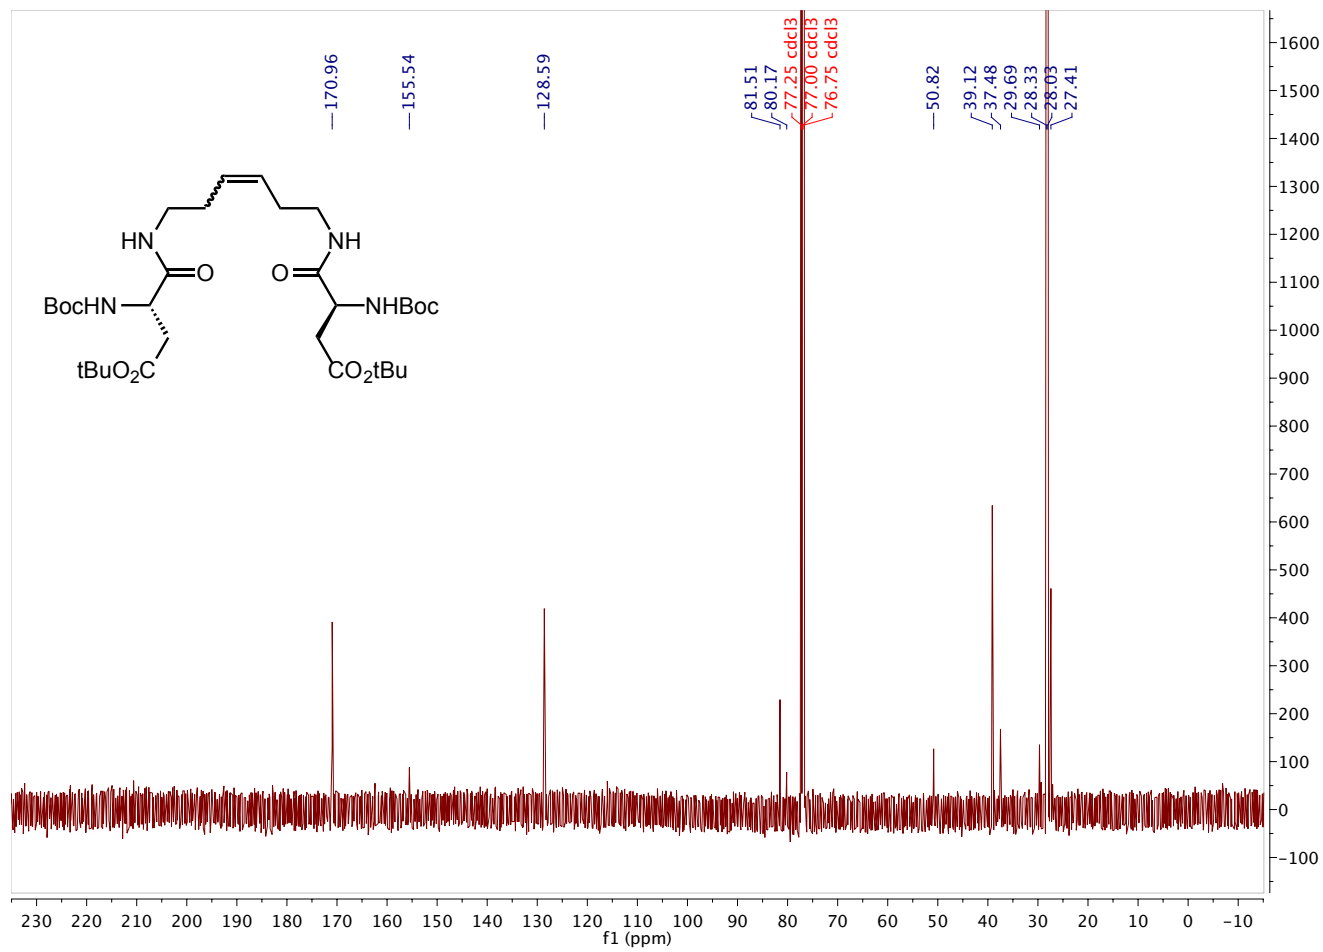

$^1\text{H}$  NMR (500 MHz,  $\text{CDCl}_3$ ) spectrum of compound **6o**

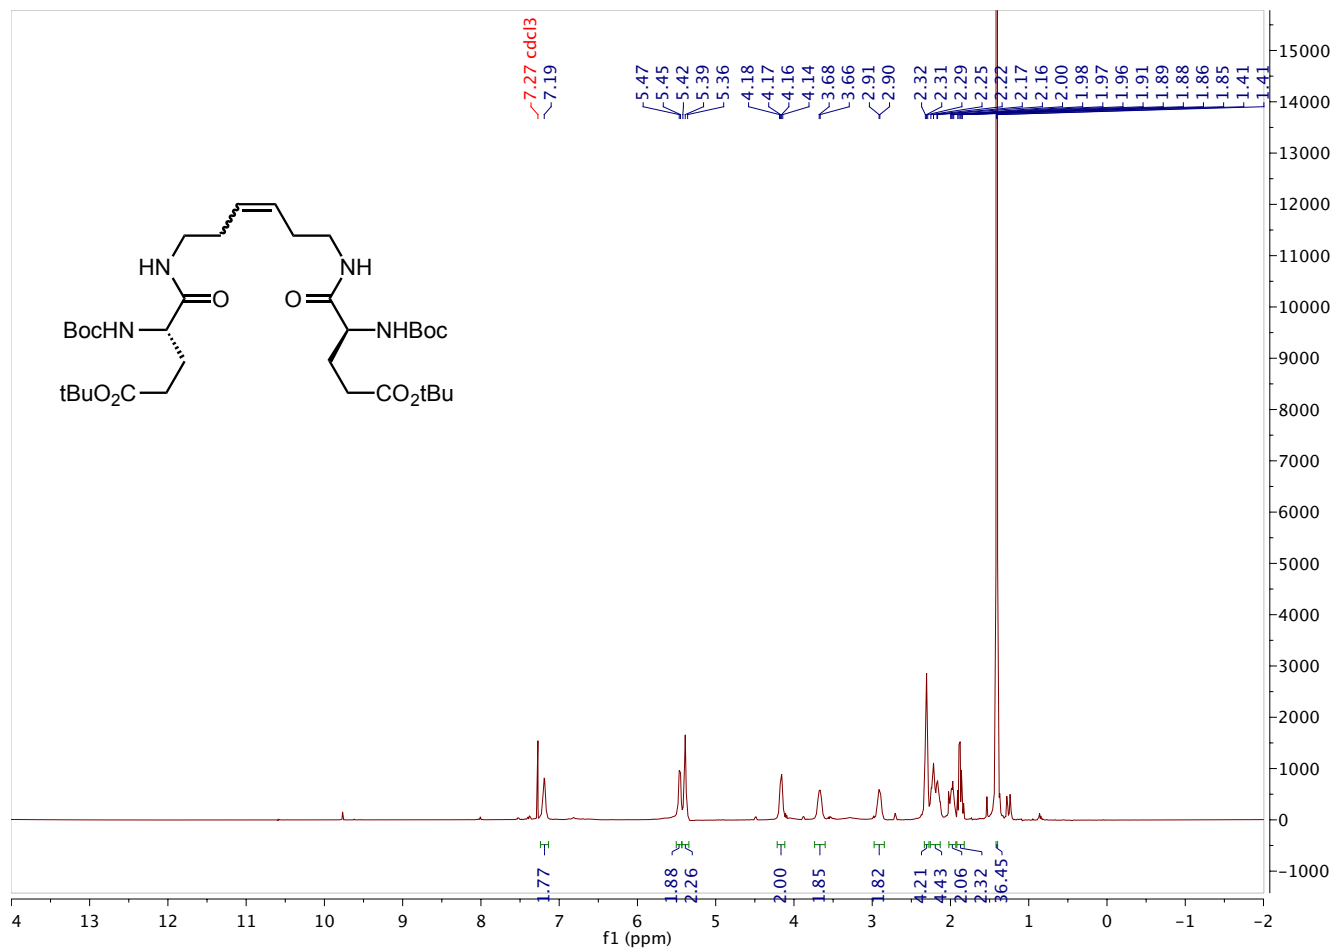

$^{13}\text{C}$  NMR (126 MHz,  $\text{CDCl}_3$ ) spectrum of compound **60**

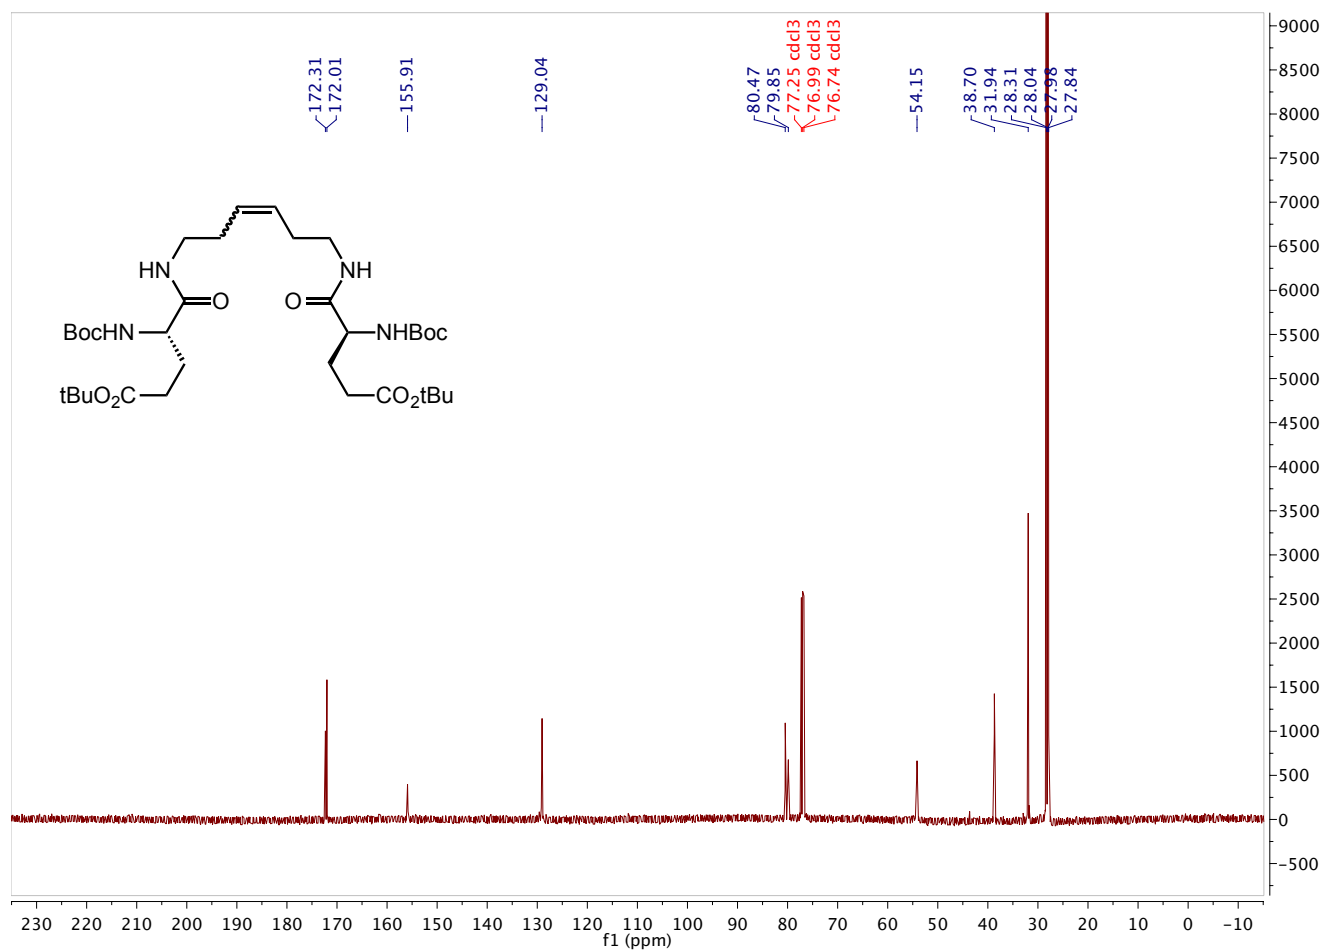

$^1\text{H}$  NMR (500 MHz,  $\text{CDCl}_3$ ) spectrum of compound **6p**

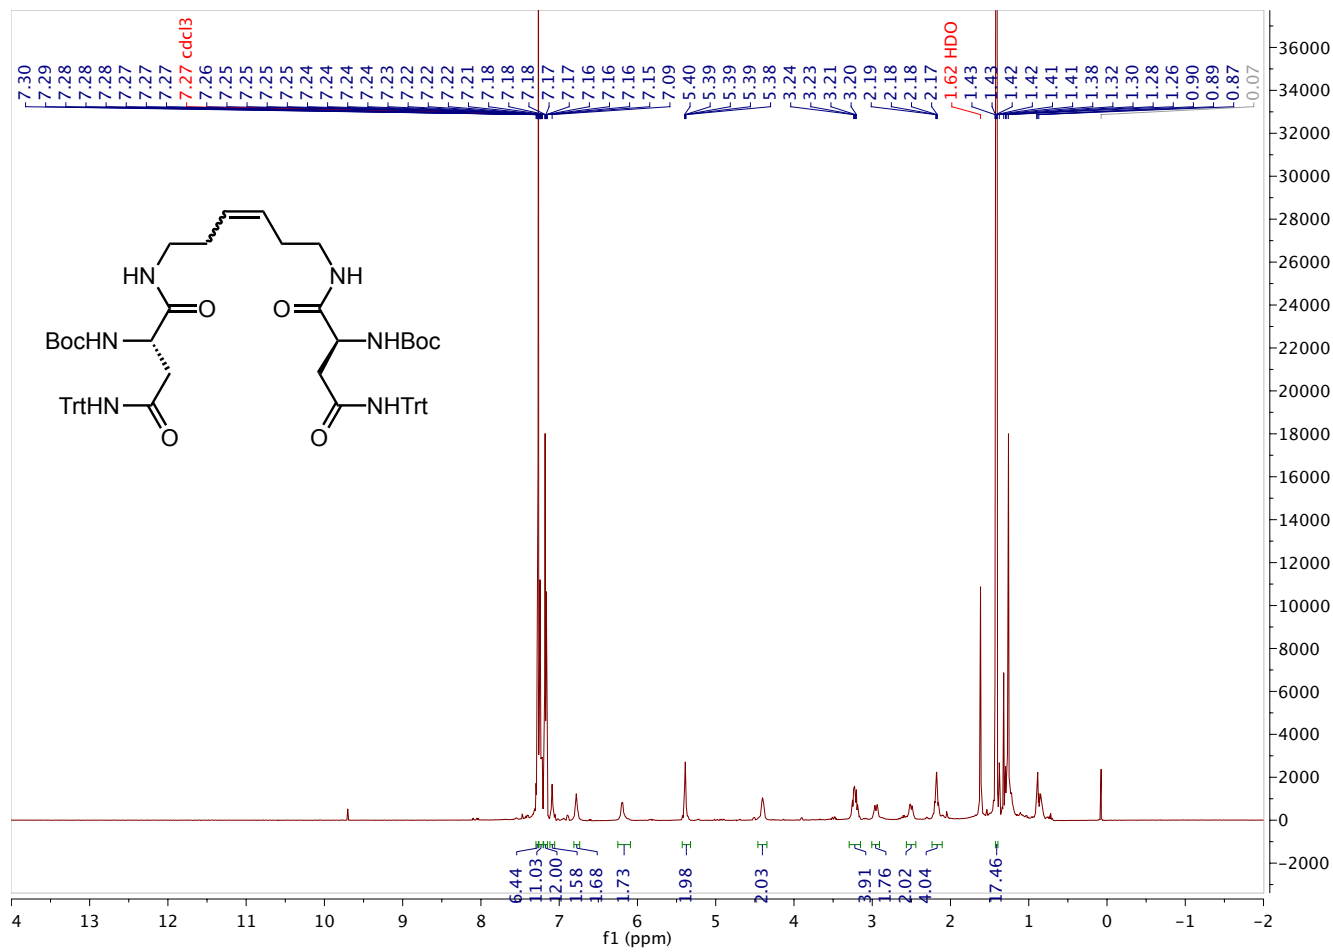

$^{13}\text{C}$  NMR (126 MHz,  $\text{CDCl}_3$ ) spectrum of compound **6p**

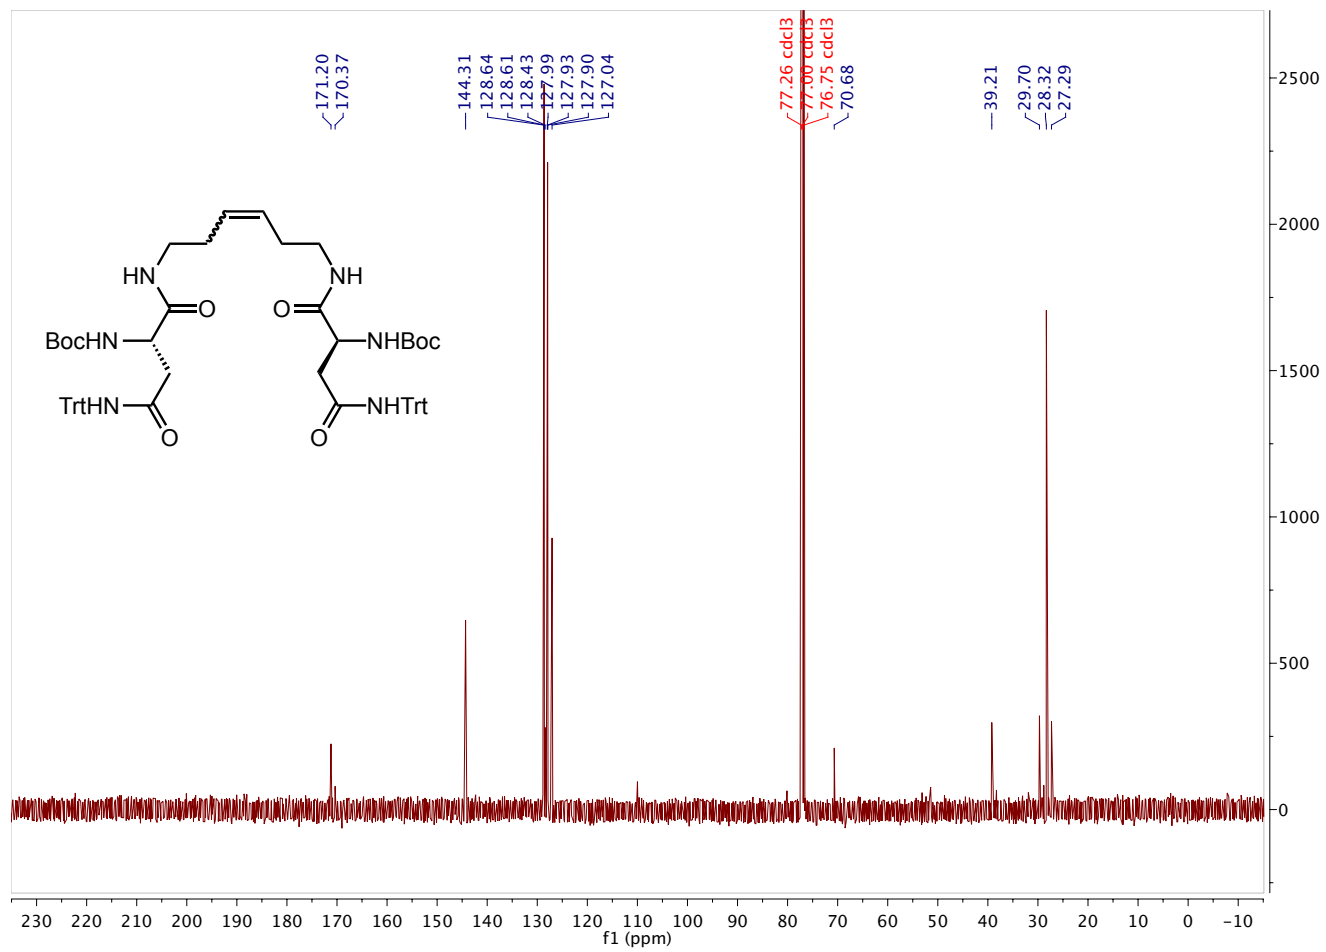



<sup>1</sup>H NMR (500 MHz, CDCl<sub>3</sub>) spectrum of compound **6q**

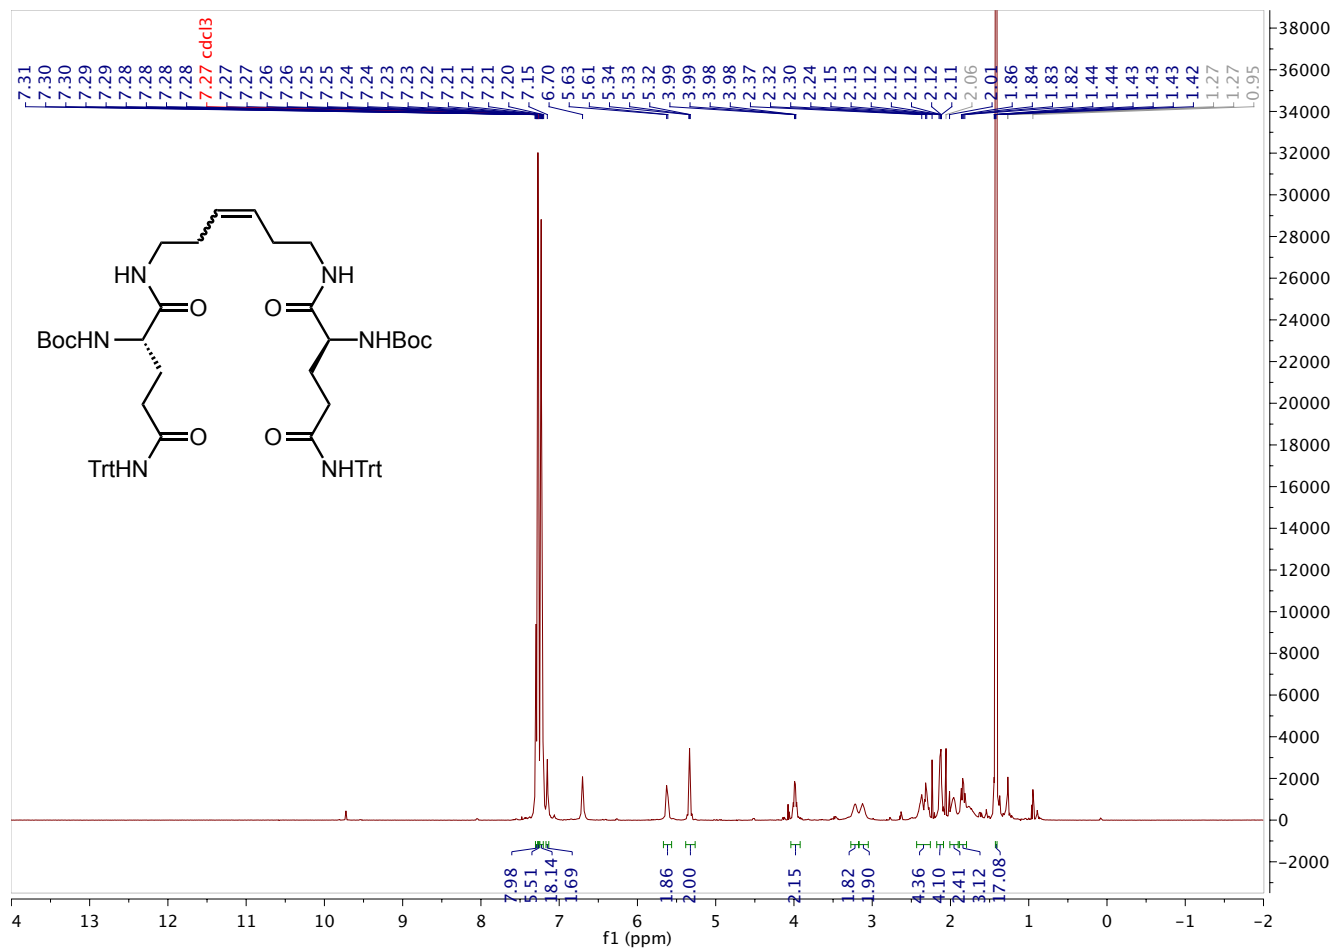

$^{13}\text{C}$  NMR (126 MHz,  $\text{CDCl}_3$ ) spectrum of compound **6q**

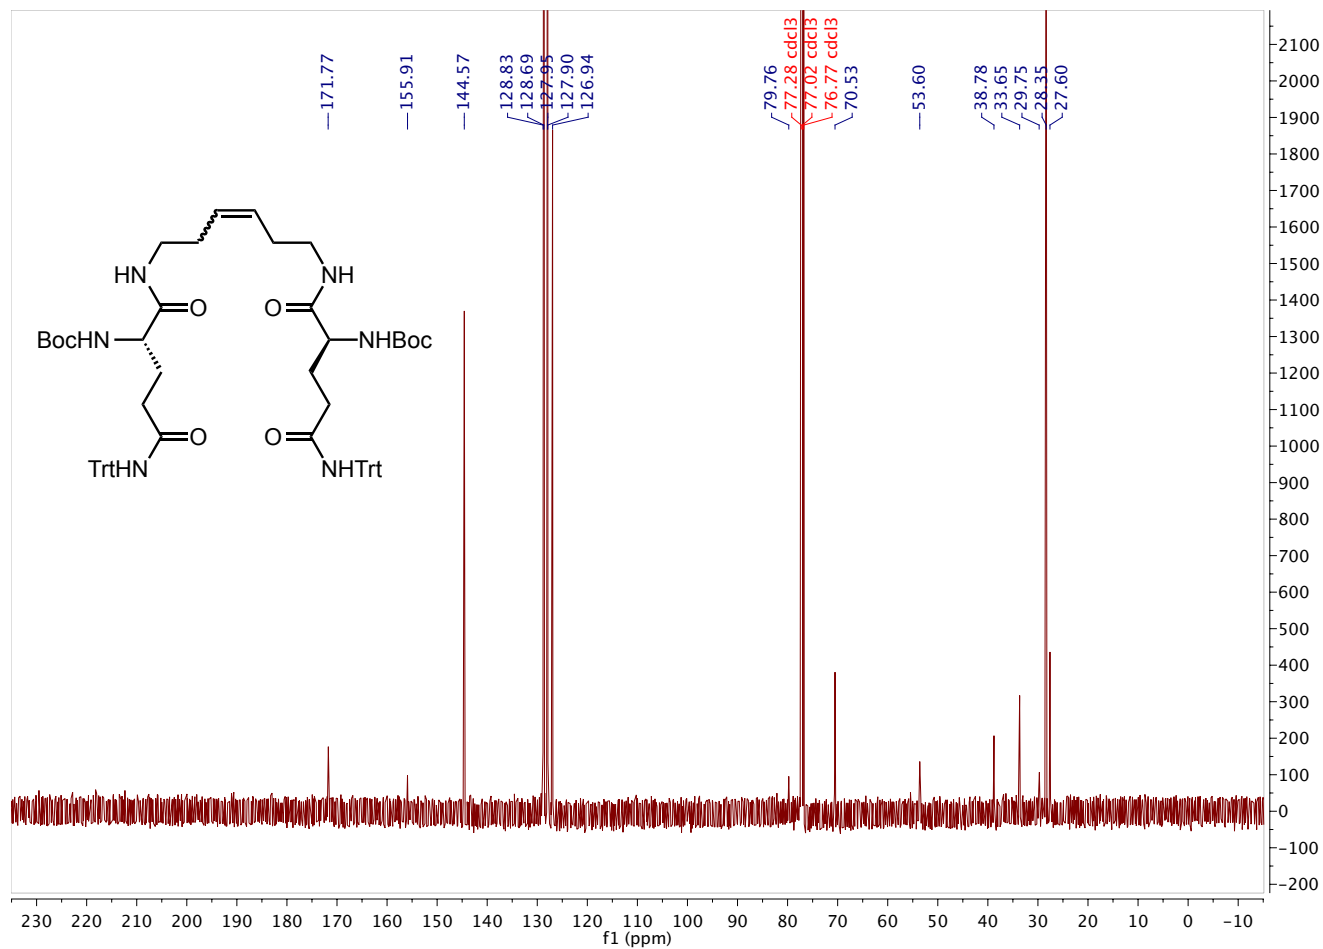

<sup>1</sup>H NMR (500 MHz, CDCl<sub>3</sub>) spectrum of compound **6r**

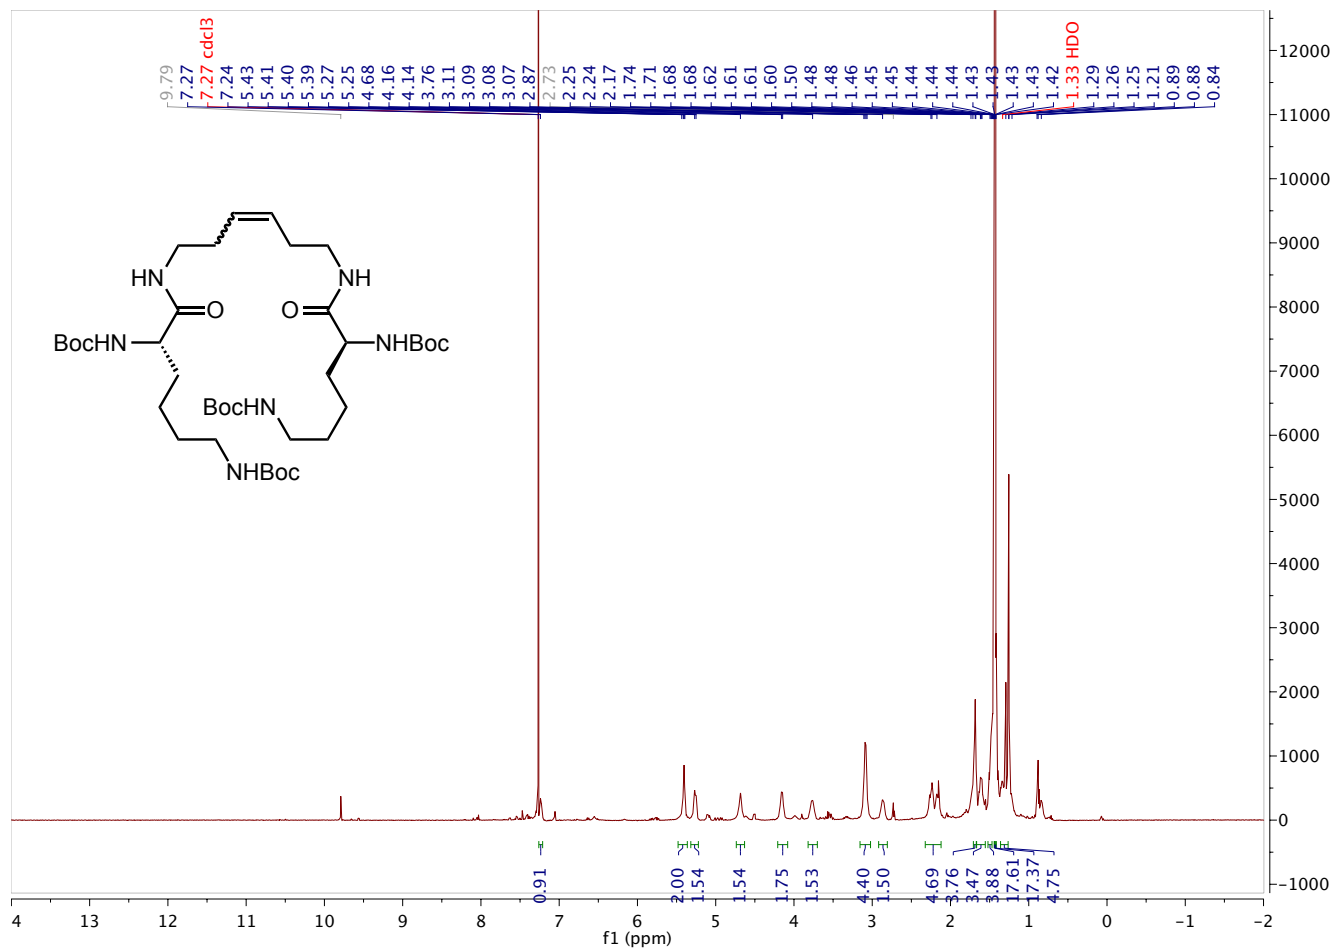

$^{13}\text{C}$  NMR (126 MHz,  $\text{CDCl}_3$ ) spectrum of compound **6r**

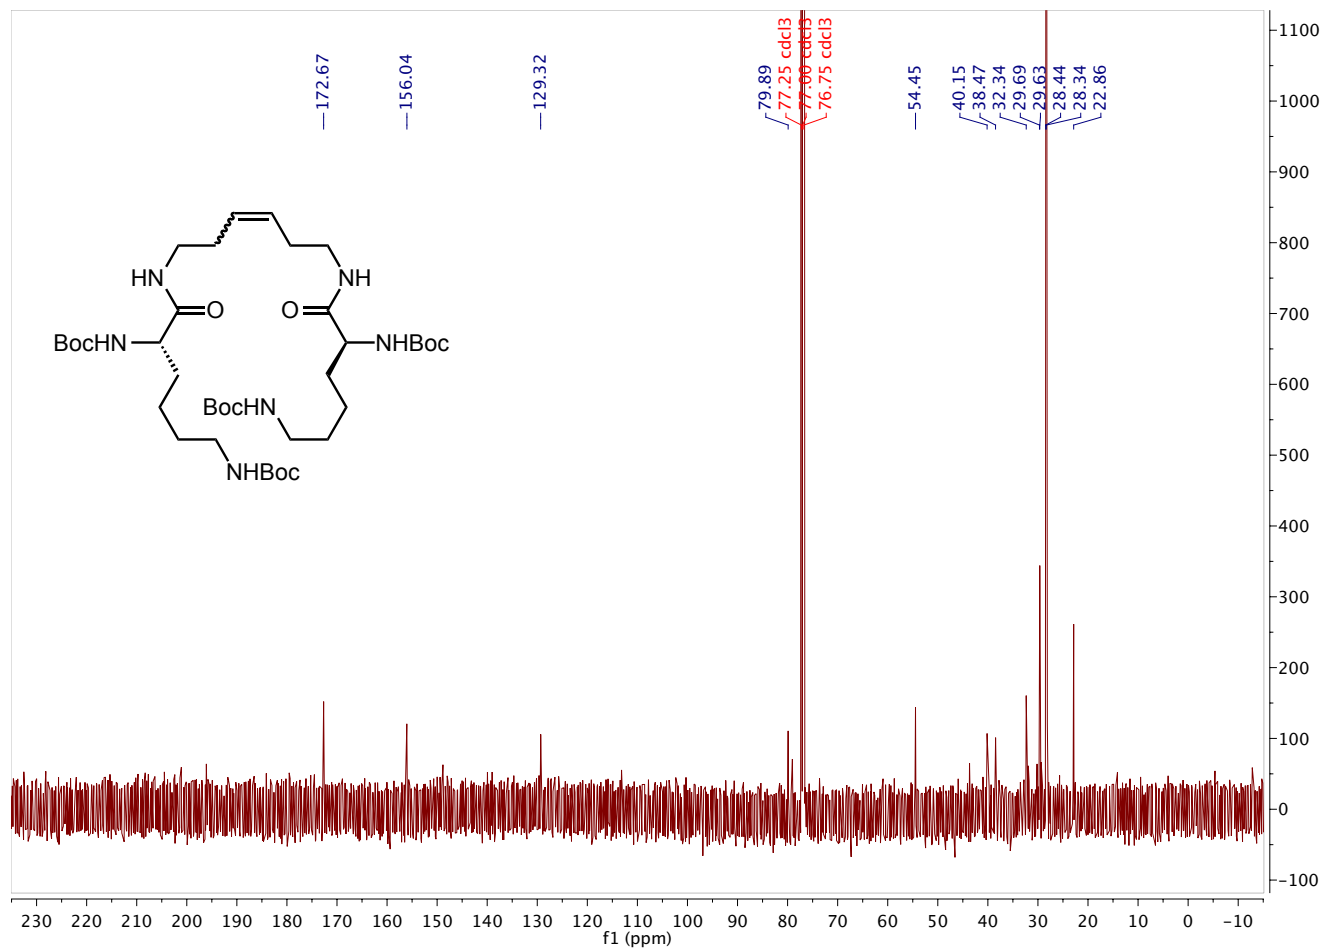

$^1\text{H}$  NMR (500 MHz,  $\text{CD}_3\text{OD}$ ) spectrum of compound **6s**

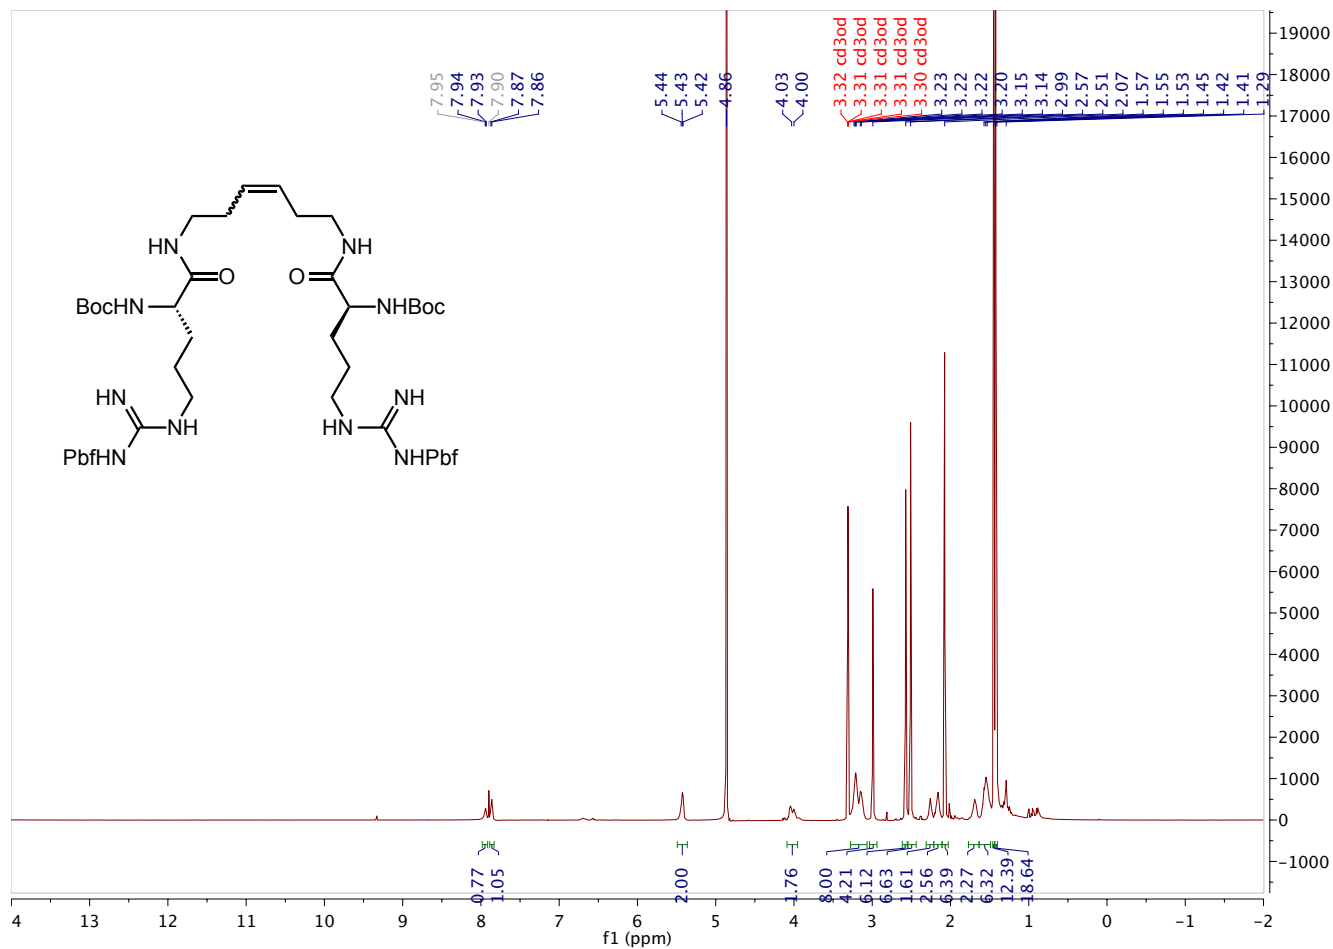

$^{13}\text{C}$  NMR (126 MHz,  $\text{CD}_3\text{OD}$ ) spectrum of compound **6s**

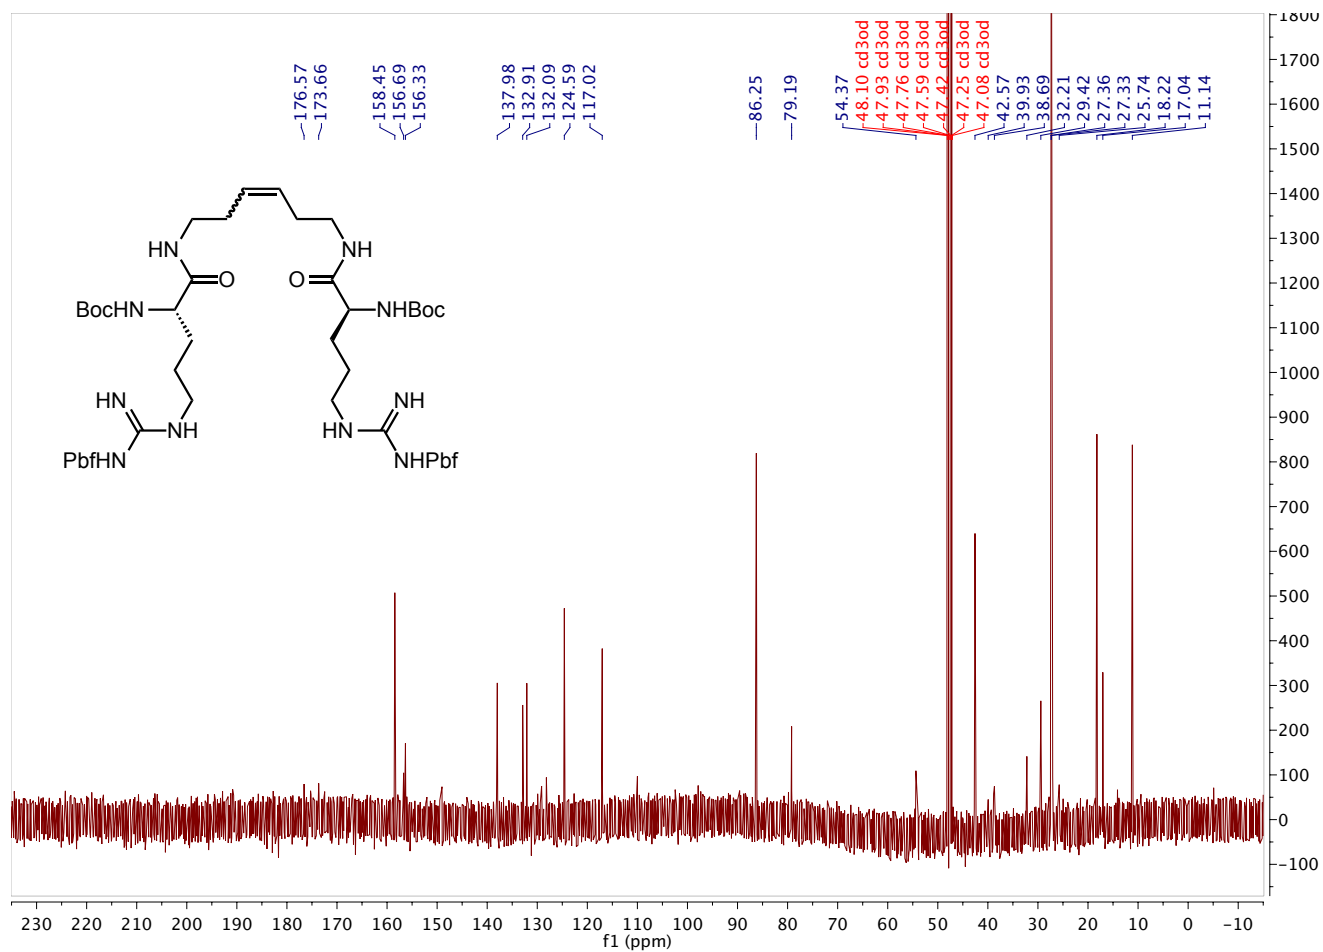

$^1\text{H}$  NMR (500 MHz,  $\text{CDCl}_3$ ) spectrum of compound 7

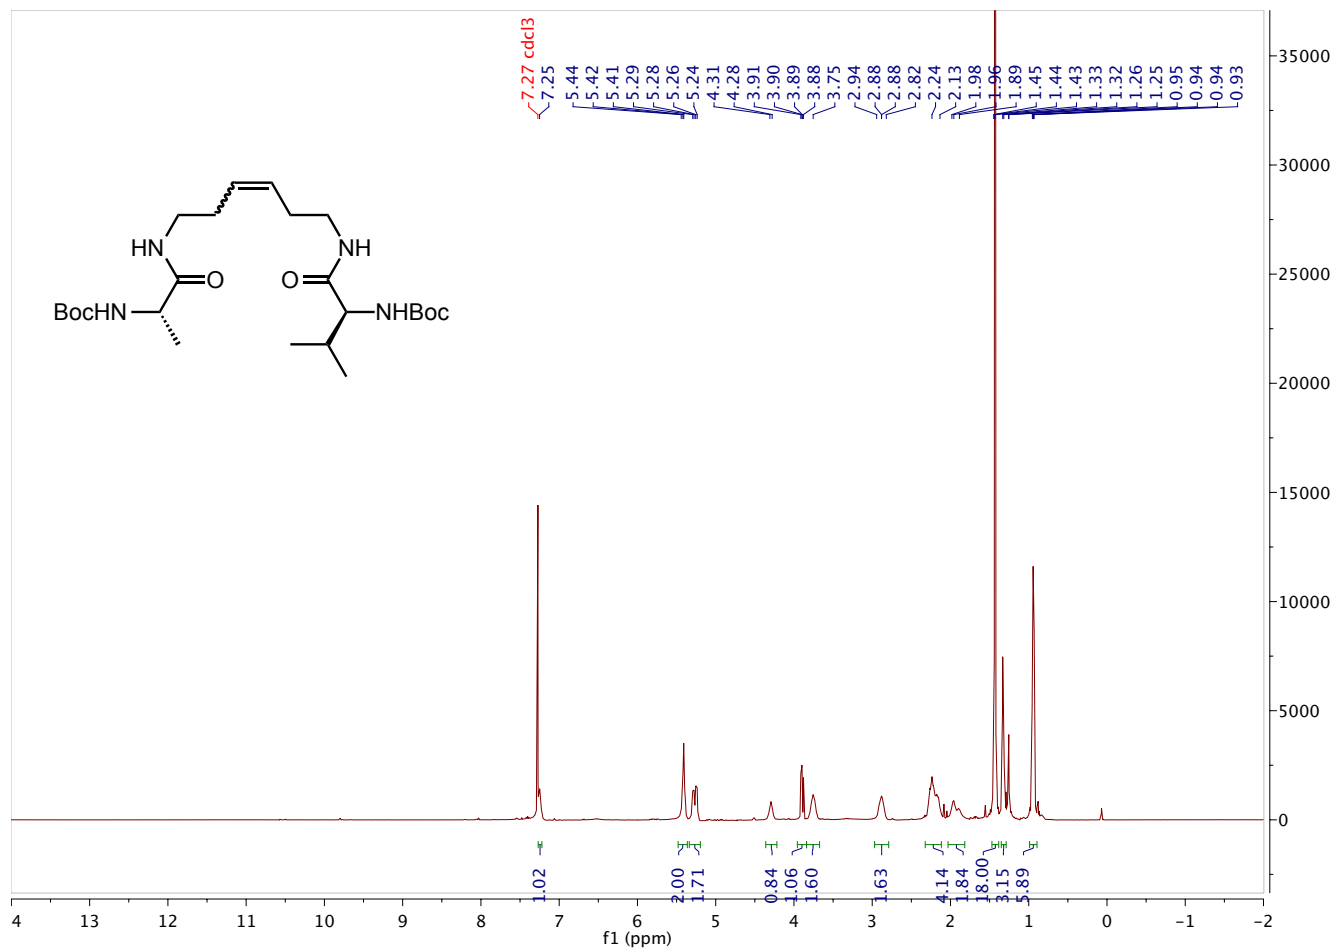

$^{13}\text{C}$  NMR (126 MHz,  $\text{CDCl}_3$ ) spectrum of compound 7

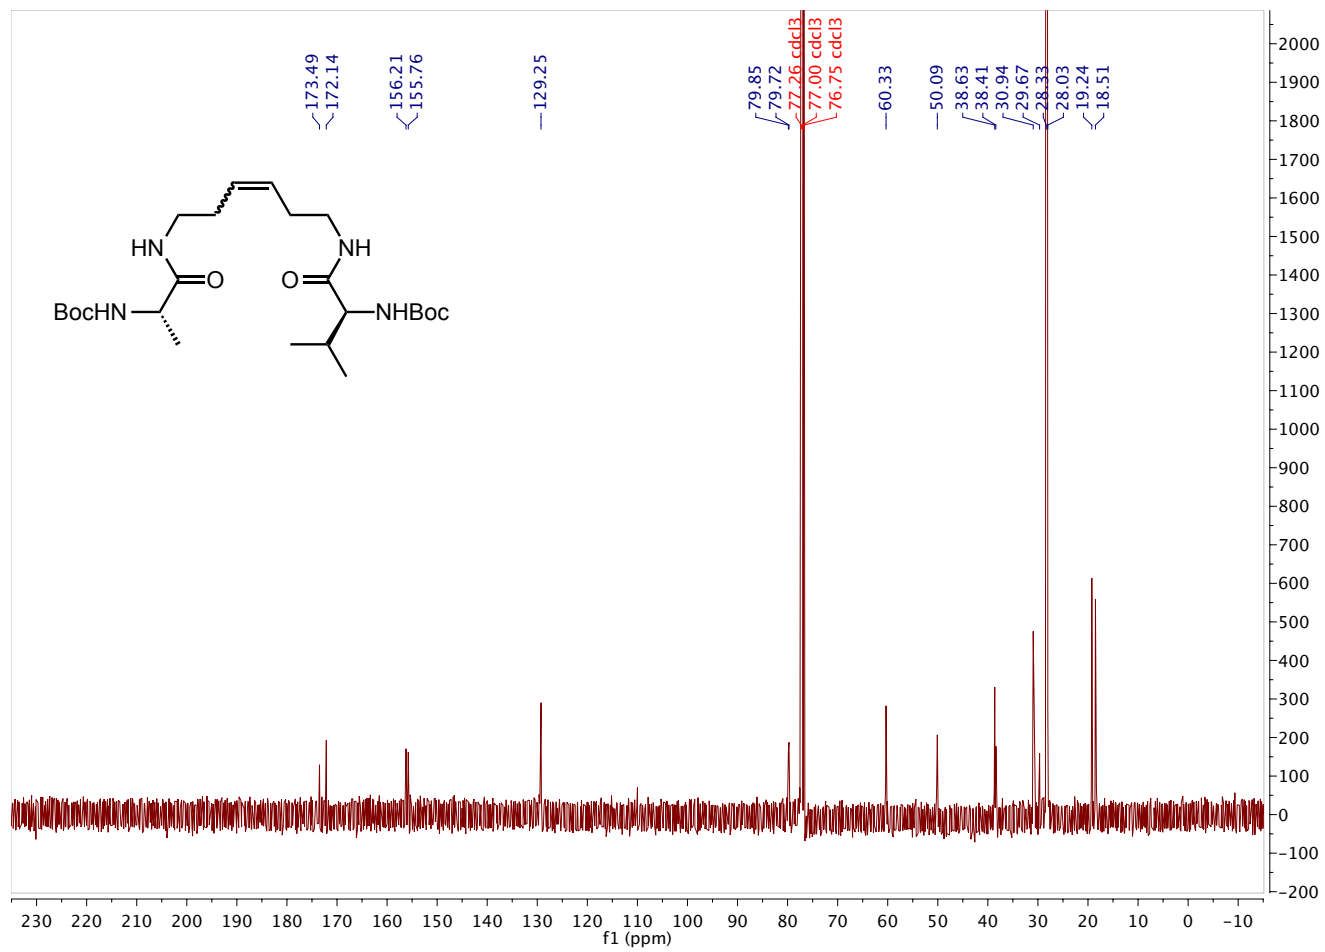



<sup>1</sup>H NMR (500 MHz, CDCl<sub>3</sub>) spectrum of compound **8**

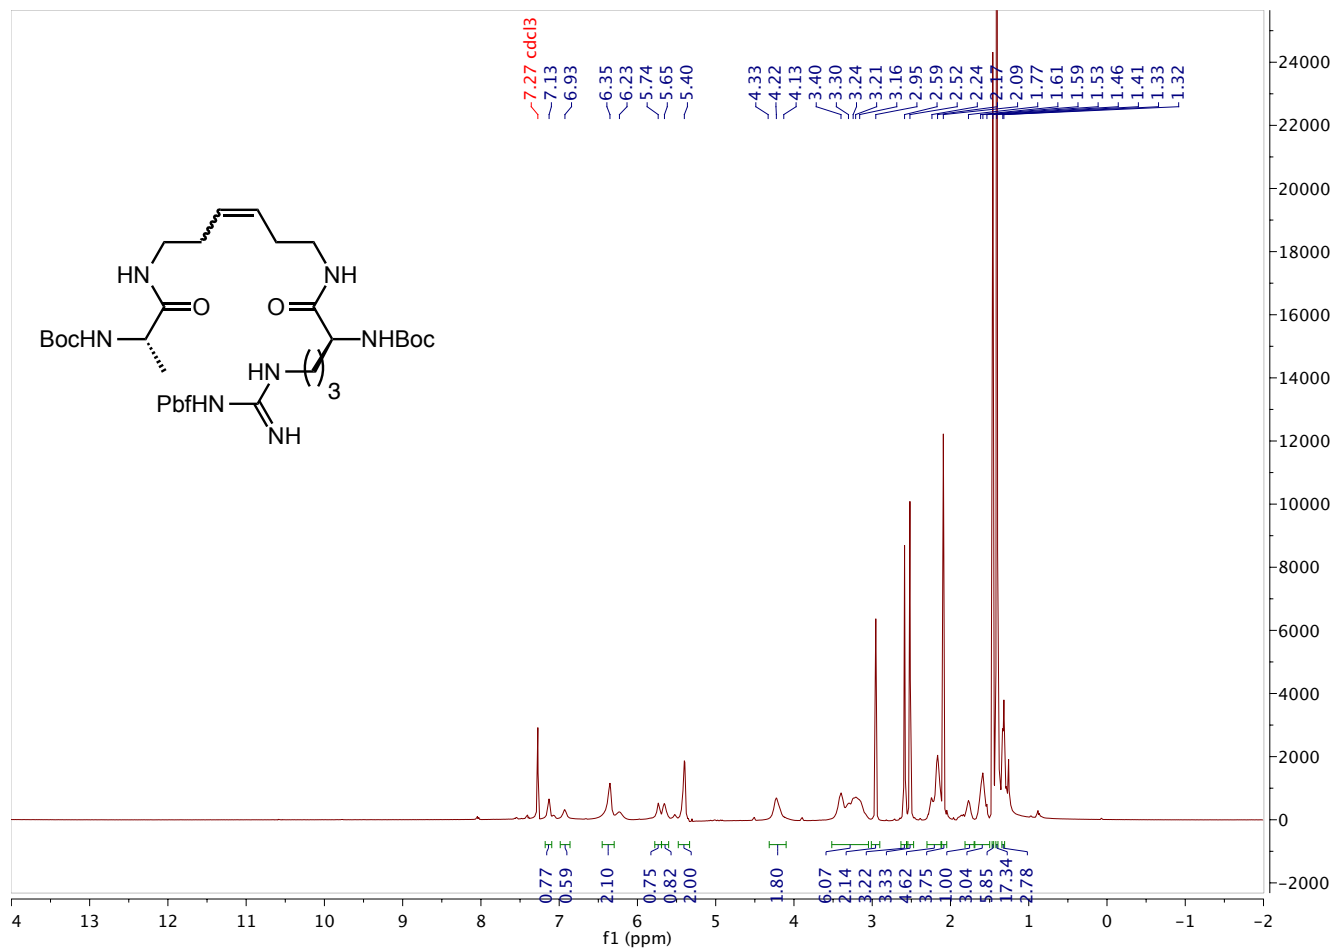

$^{13}\text{C}$  NMR (126 MHz,  $\text{CDCl}_3$ ) spectrum of compound **8**

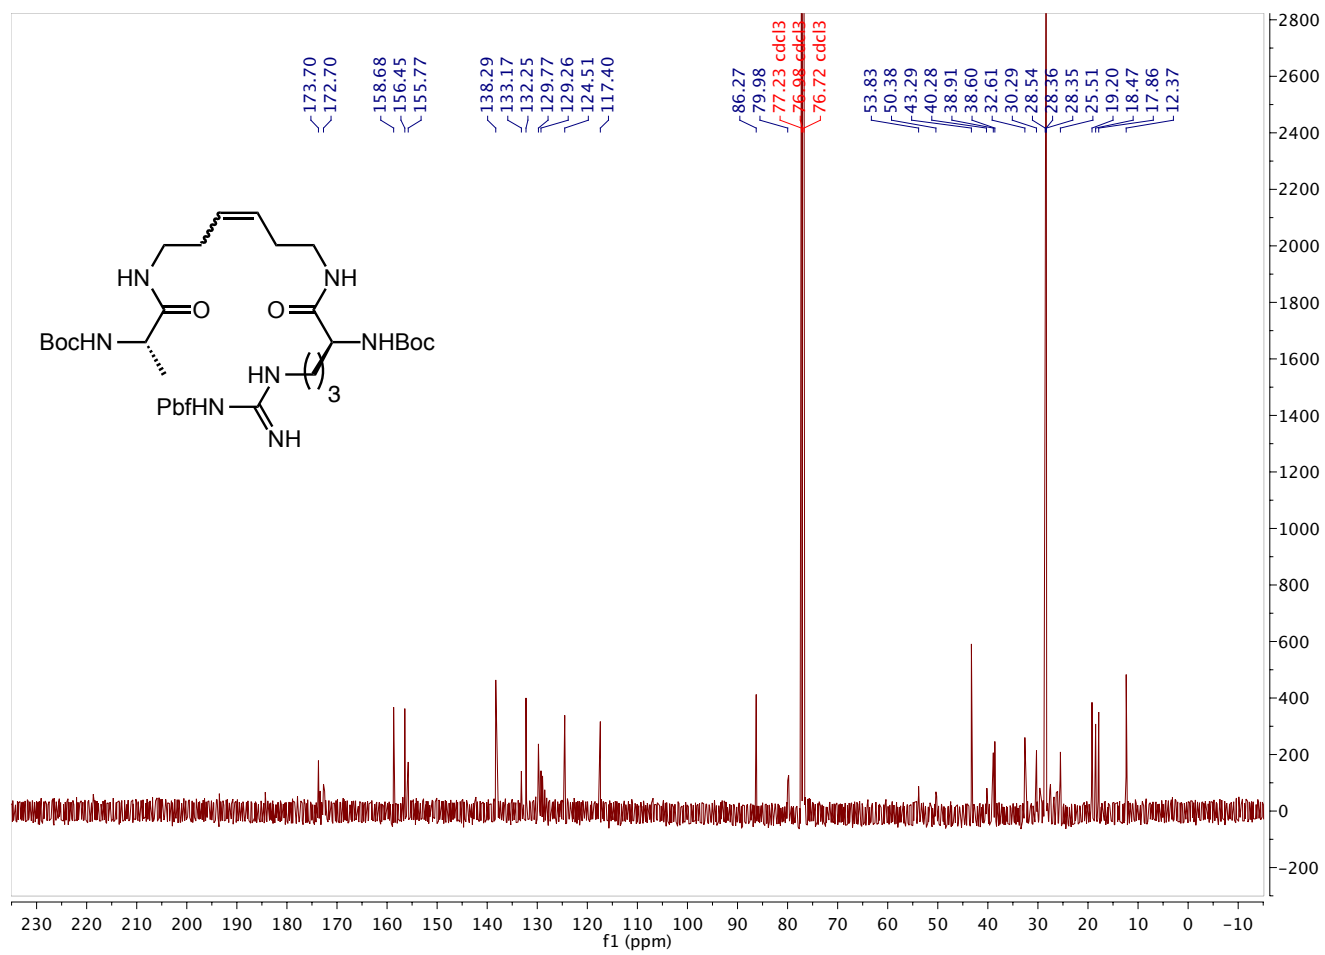

$^1\text{H}$  NMR (500 MHz,  $\text{CDCl}_3$ ) spectrum of compound **9a**

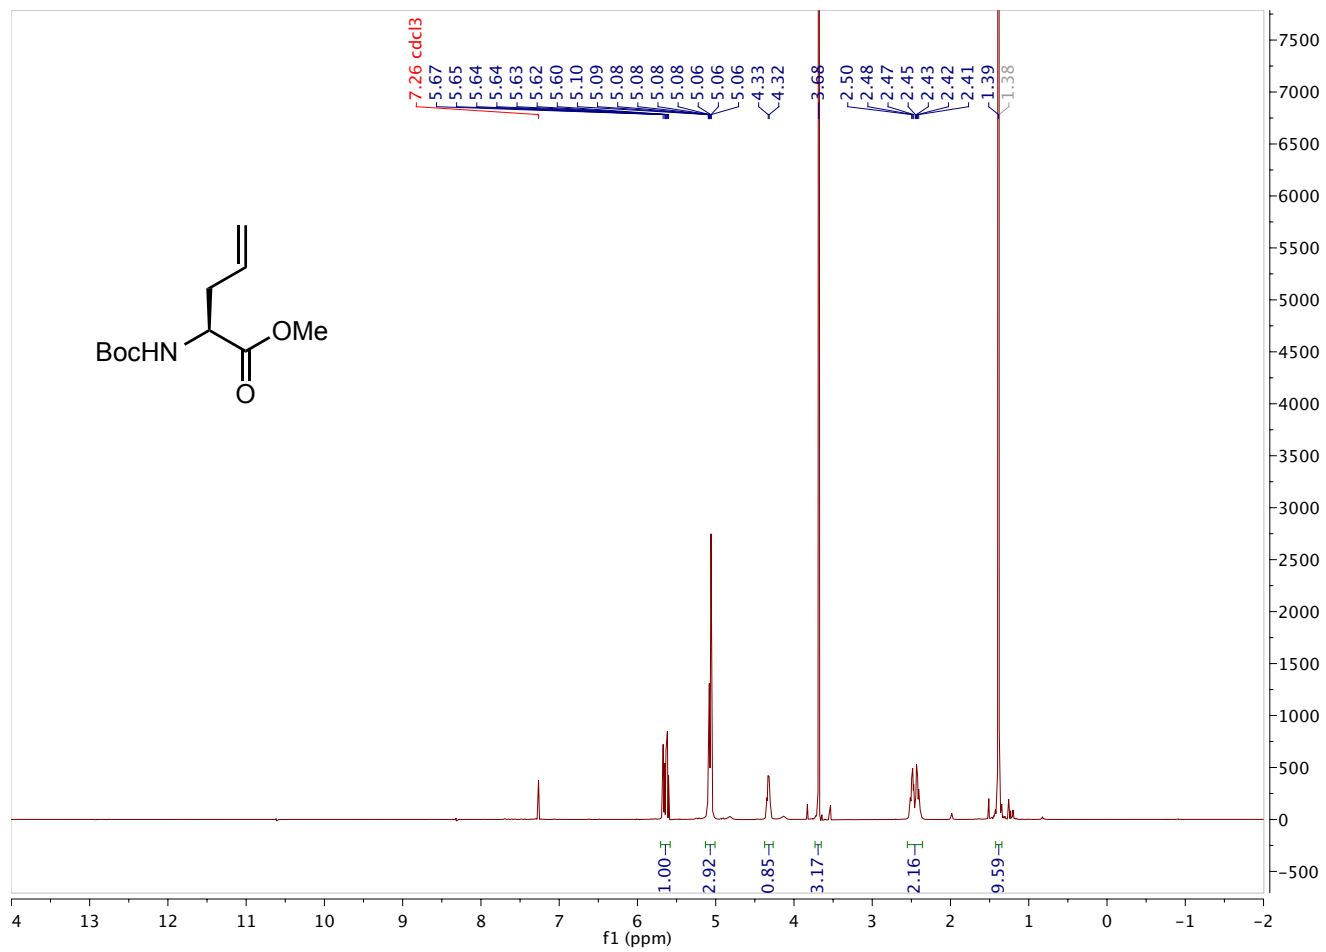

$^{13}\text{C}$  NMR (126 MHz,  $\text{CDCl}_3$ ) spectrum of compound **9a**

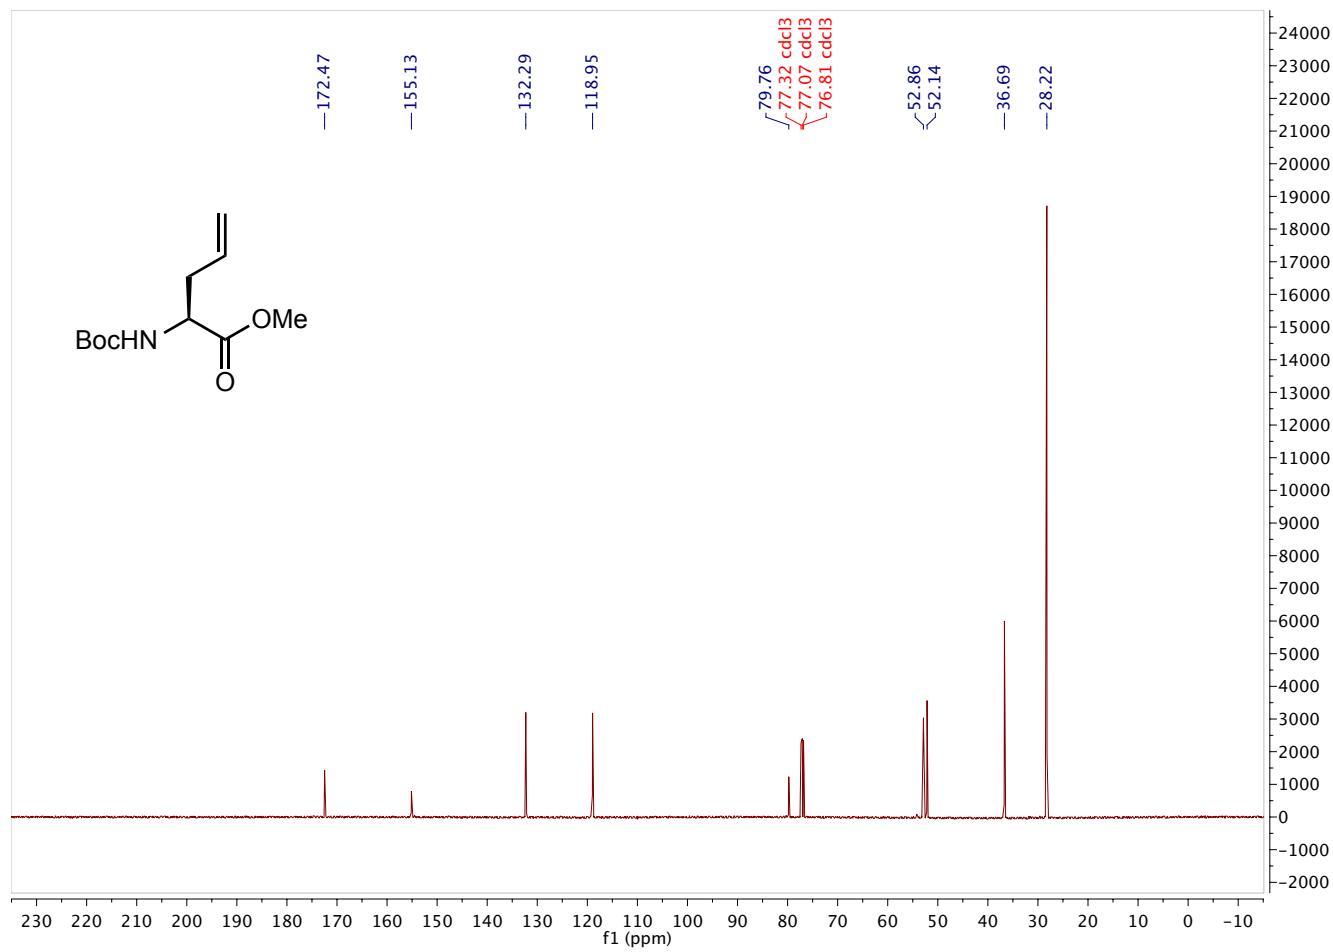

$^1\text{H}$  NMR (500 MHz,  $\text{CDCl}_3$ ) spectrum of compound **9b**

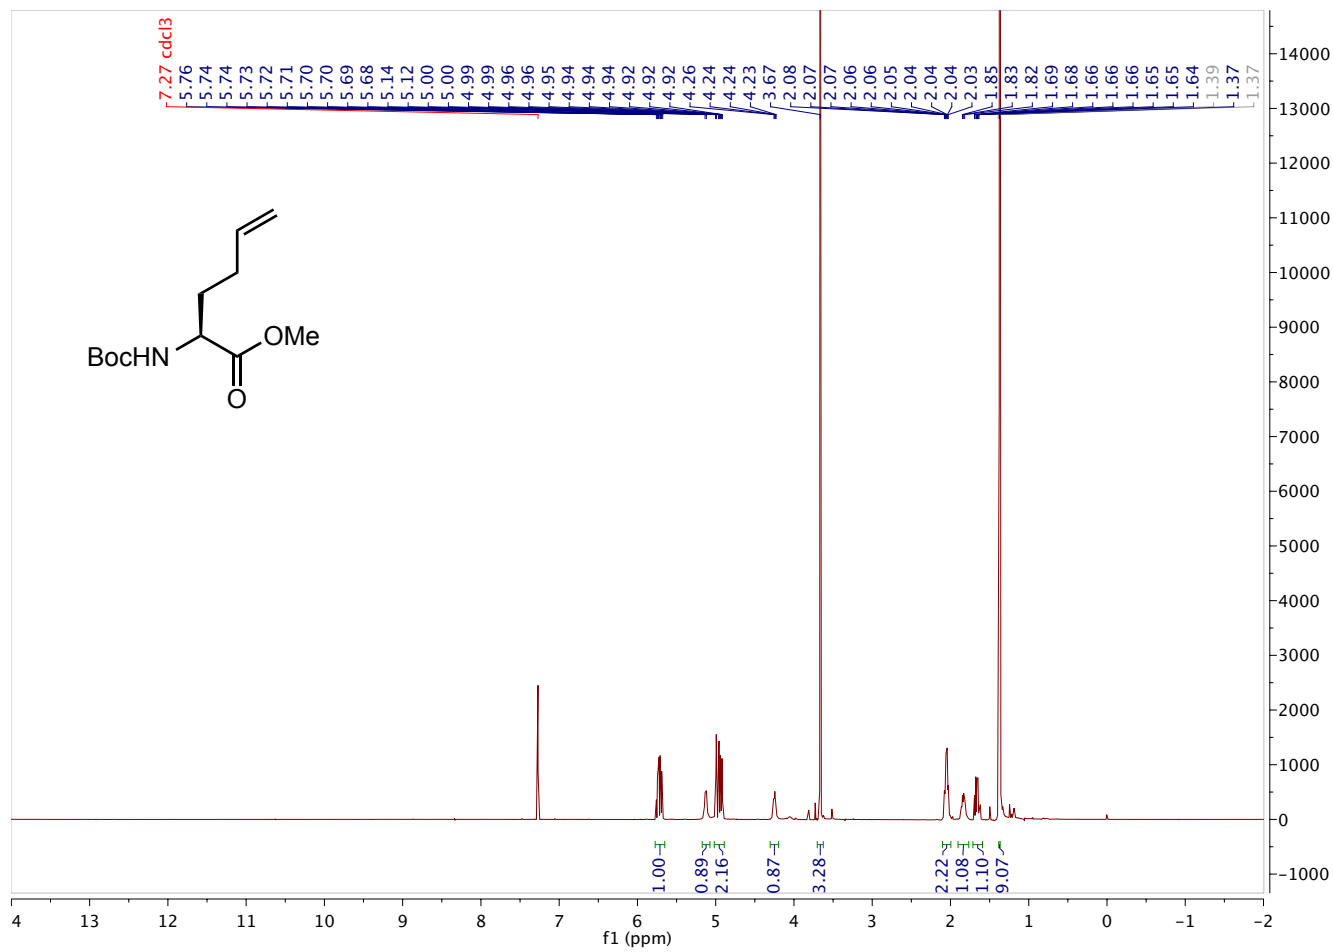

$^{13}\text{C}$  NMR (126 MHz,  $\text{CDCl}_3$ ) spectrum of compound **9b**

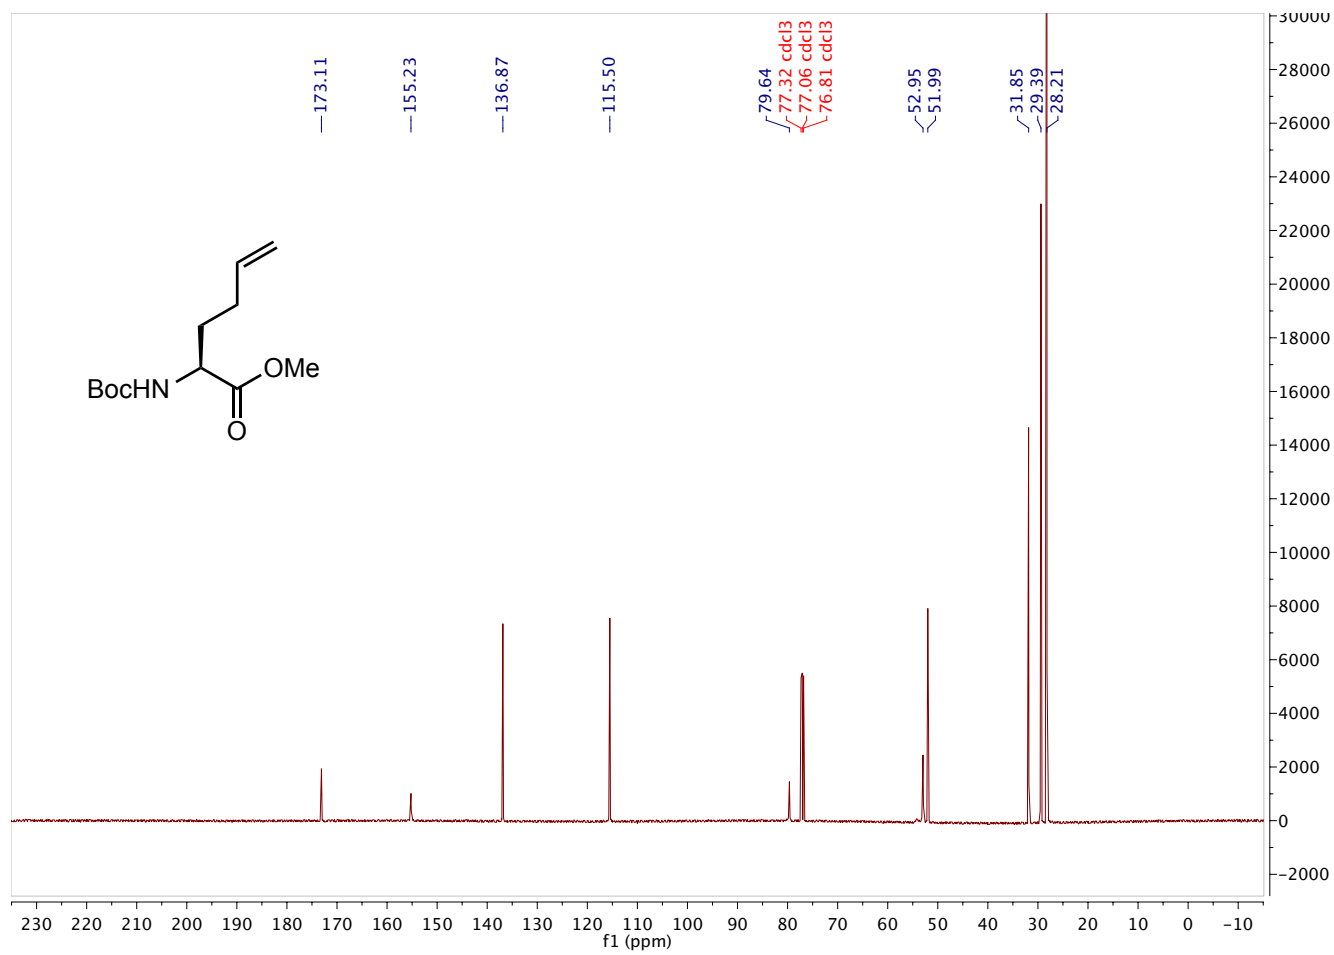

$^1\text{H}$  NMR (500 MHz,  $\text{CDCl}_3$ ) spectrum of compound **9c**

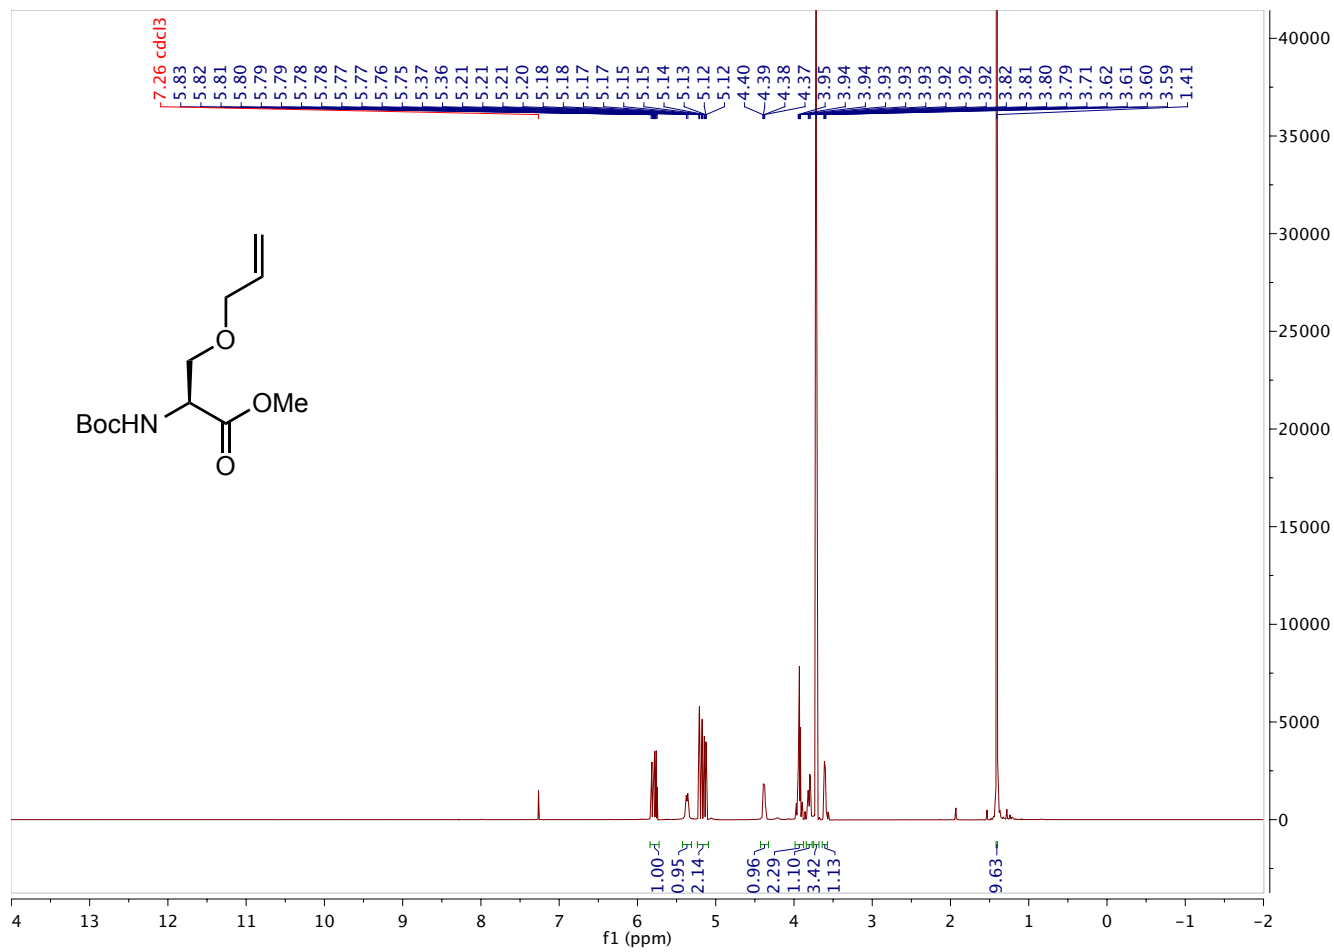

$^{13}\text{C}$  NMR (126 MHz,  $\text{CDCl}_3$ ) spectrum of compound **9c**

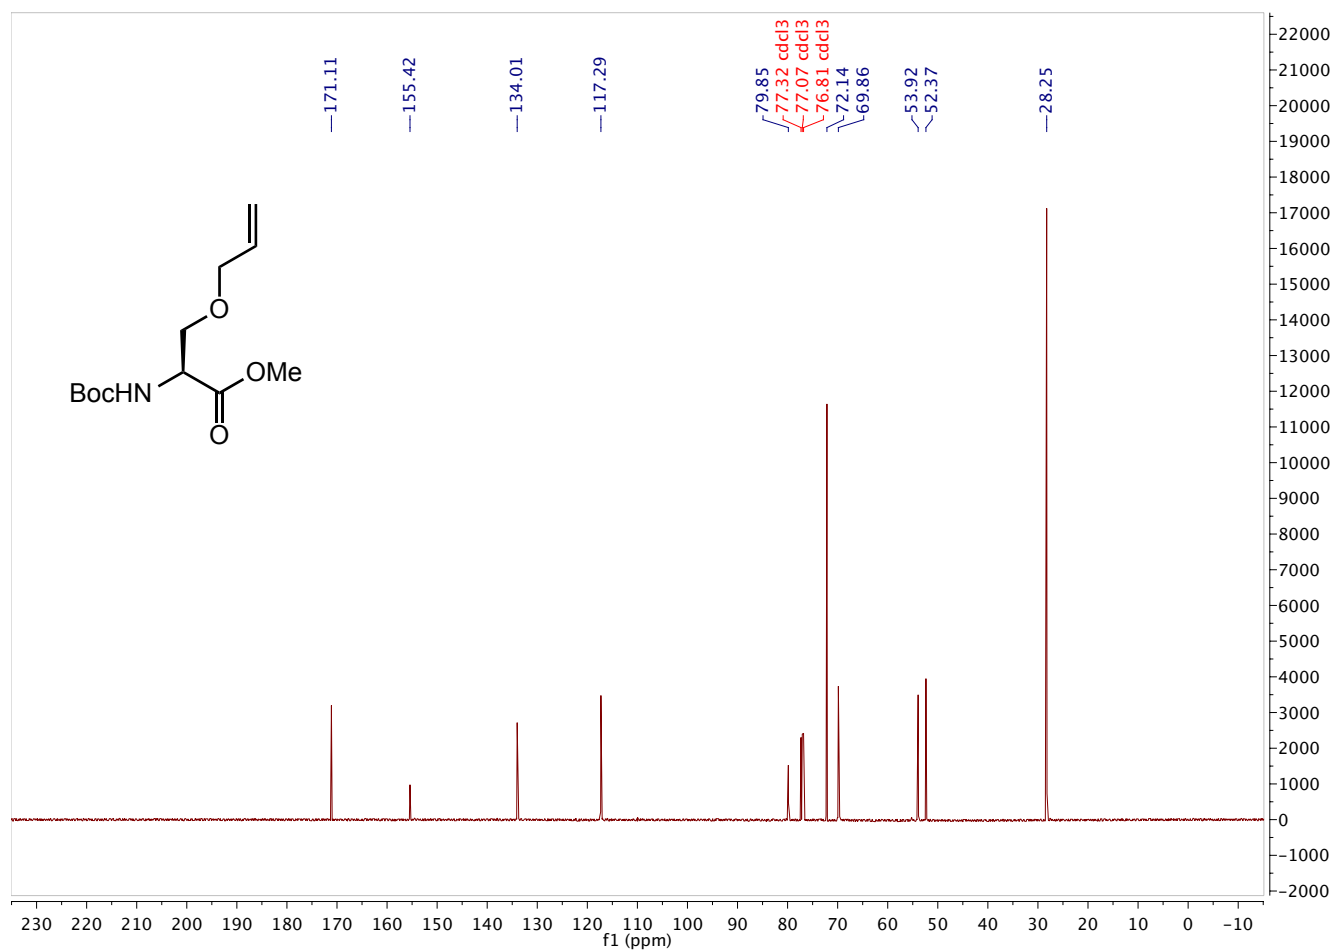



$^1\text{H}$  NMR (500 MHz,  $\text{CDCl}_3$ ) spectrum of compound **9d**

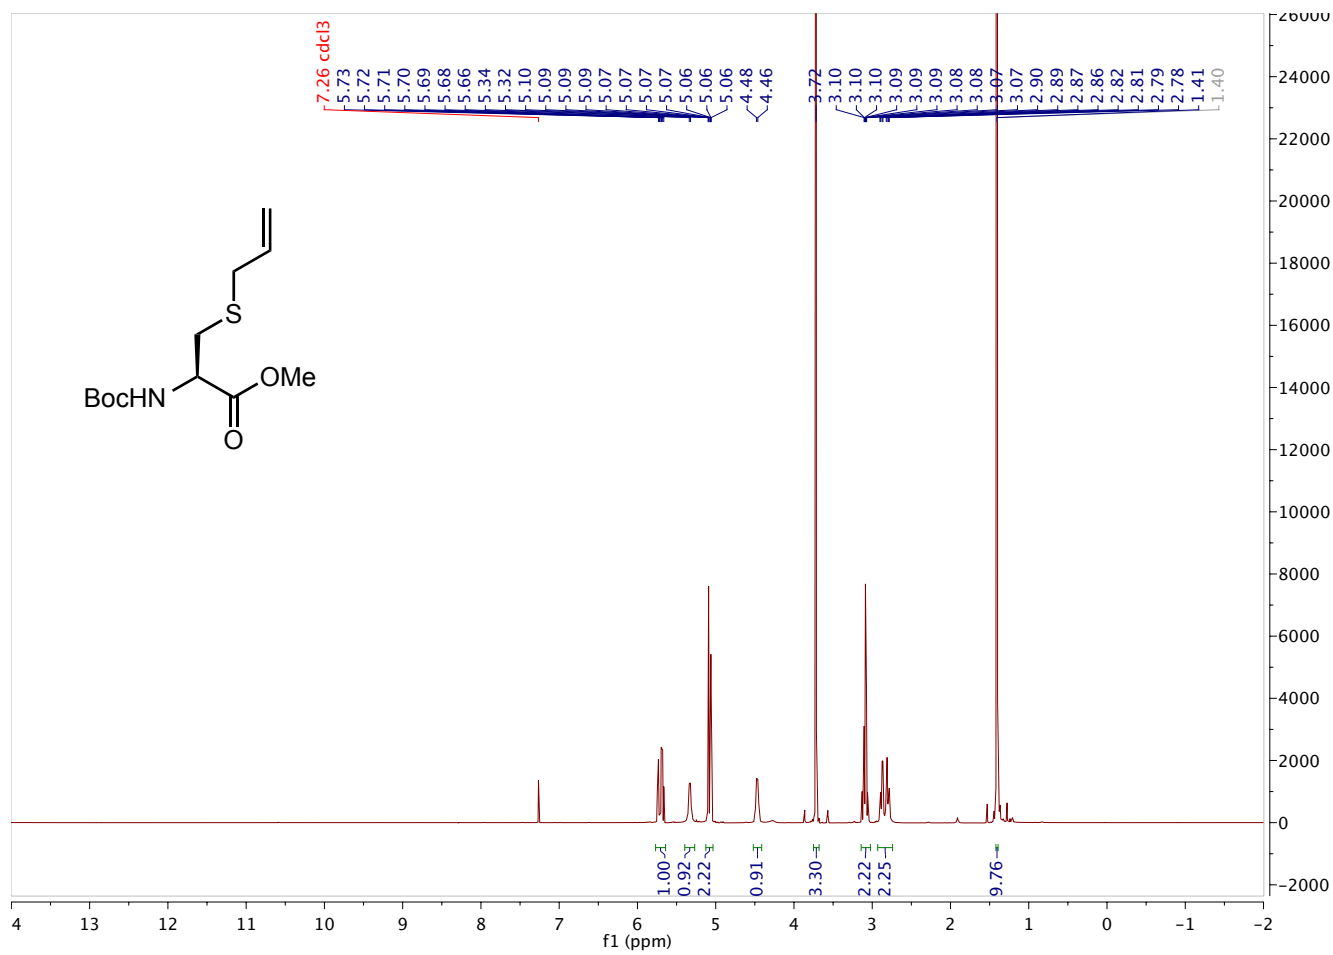

$^{13}\text{C}$  NMR (126 MHz,  $\text{CDCl}_3$ ) spectrum of compound **9d**

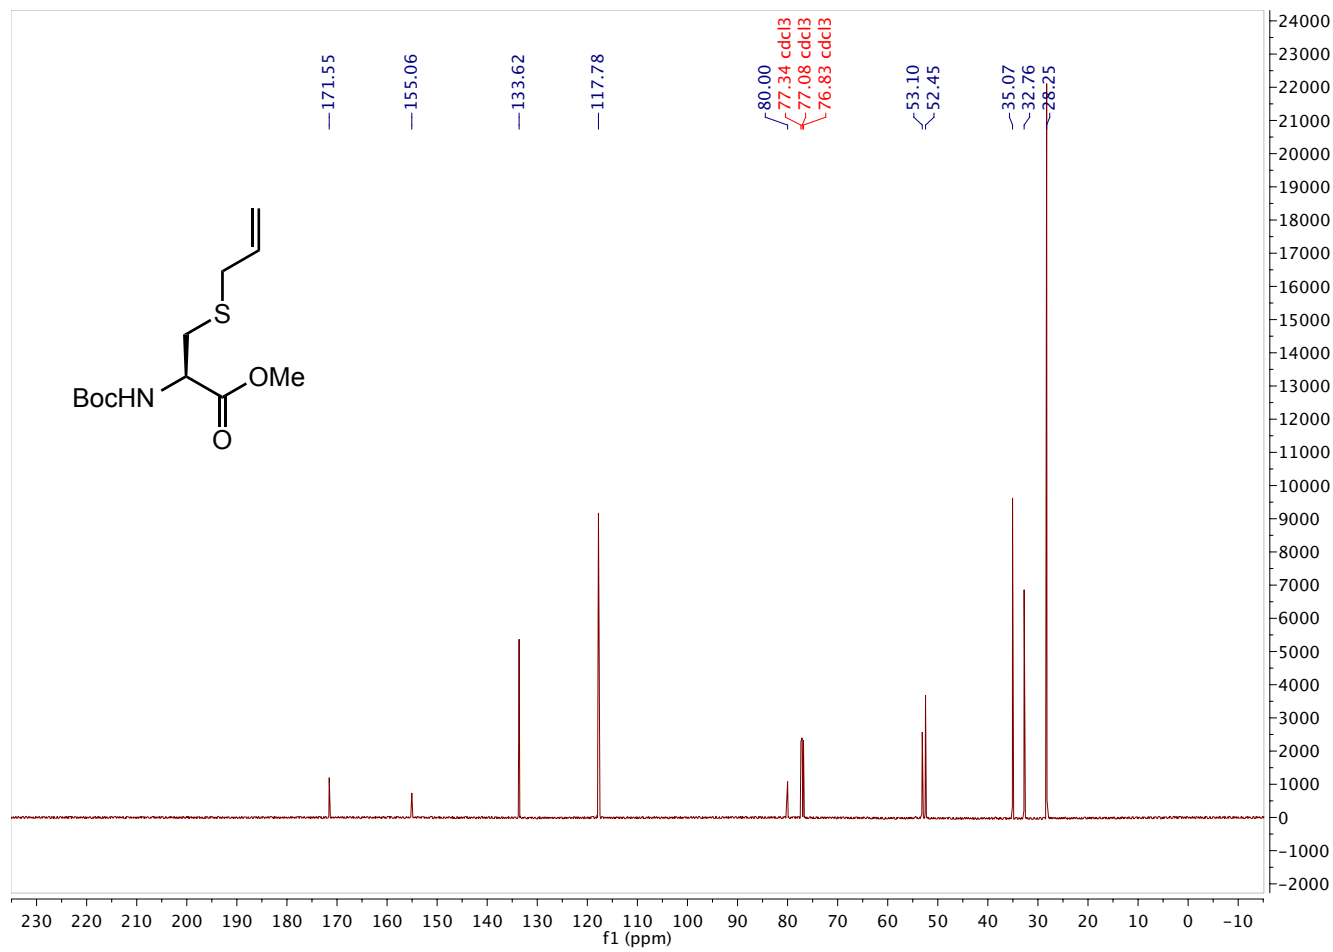

$^1\text{H}$  NMR (500 MHz,  $\text{CDCl}_3$ ) spectrum of compound **10a**

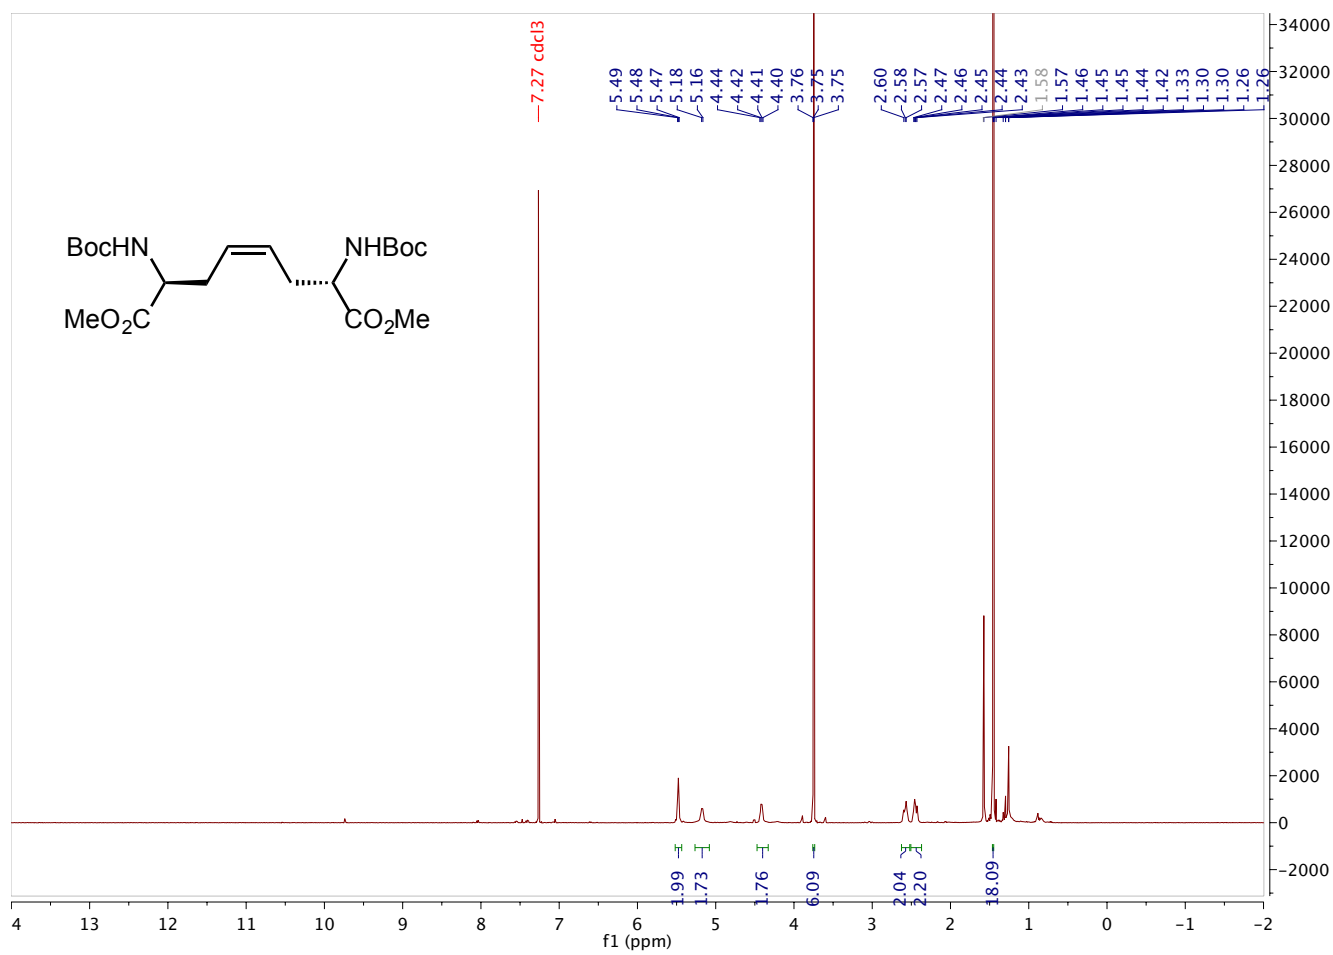

$^{13}\text{C}$  NMR (126 MHz,  $\text{CDCl}_3$ ) spectrum of compound **10a**

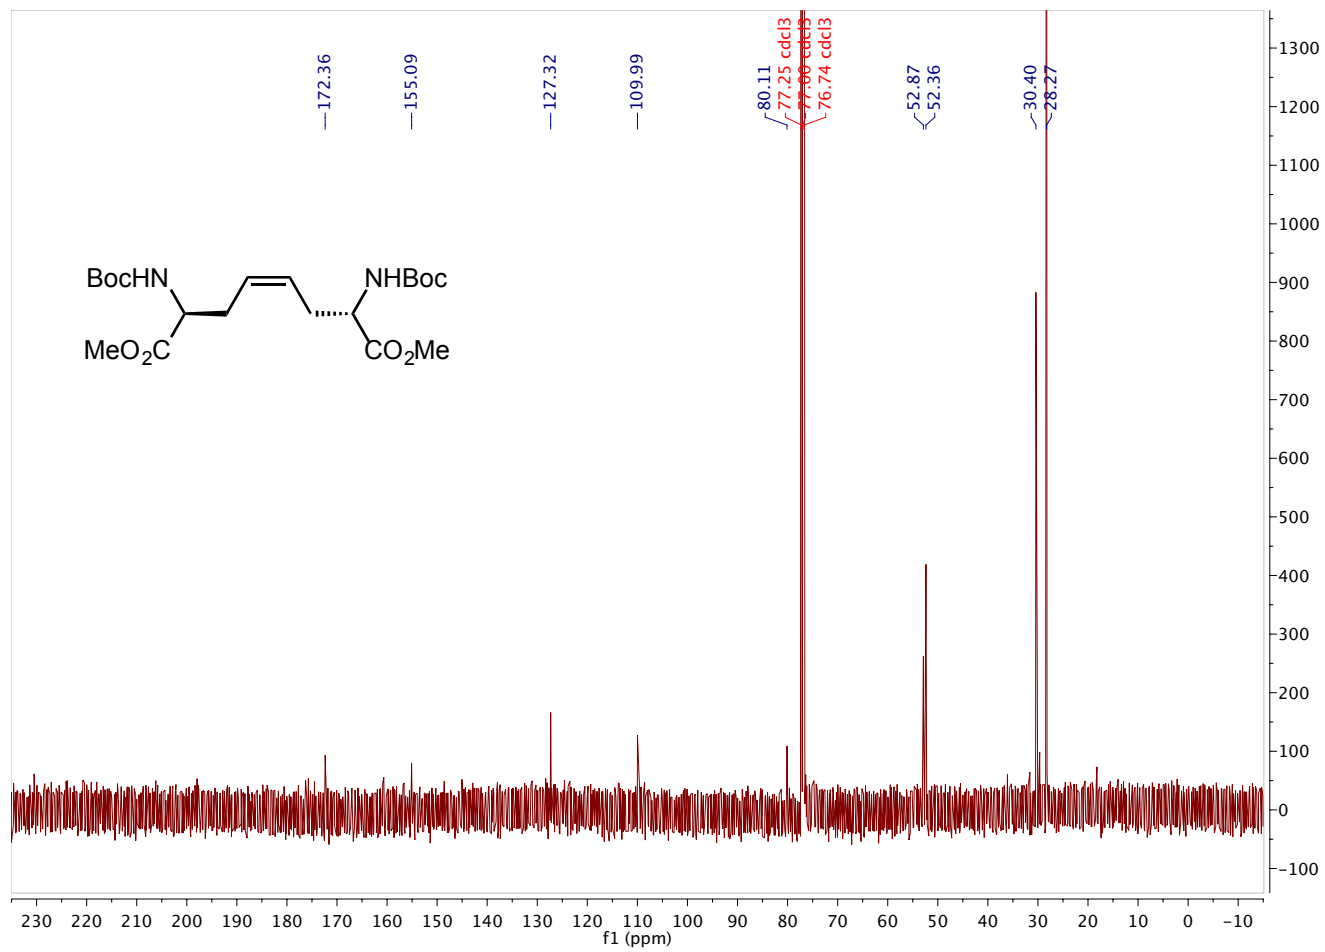

<sup>1</sup>H NMR (500 MHz, CDCl<sub>3</sub>) spectrum of compound **10b**

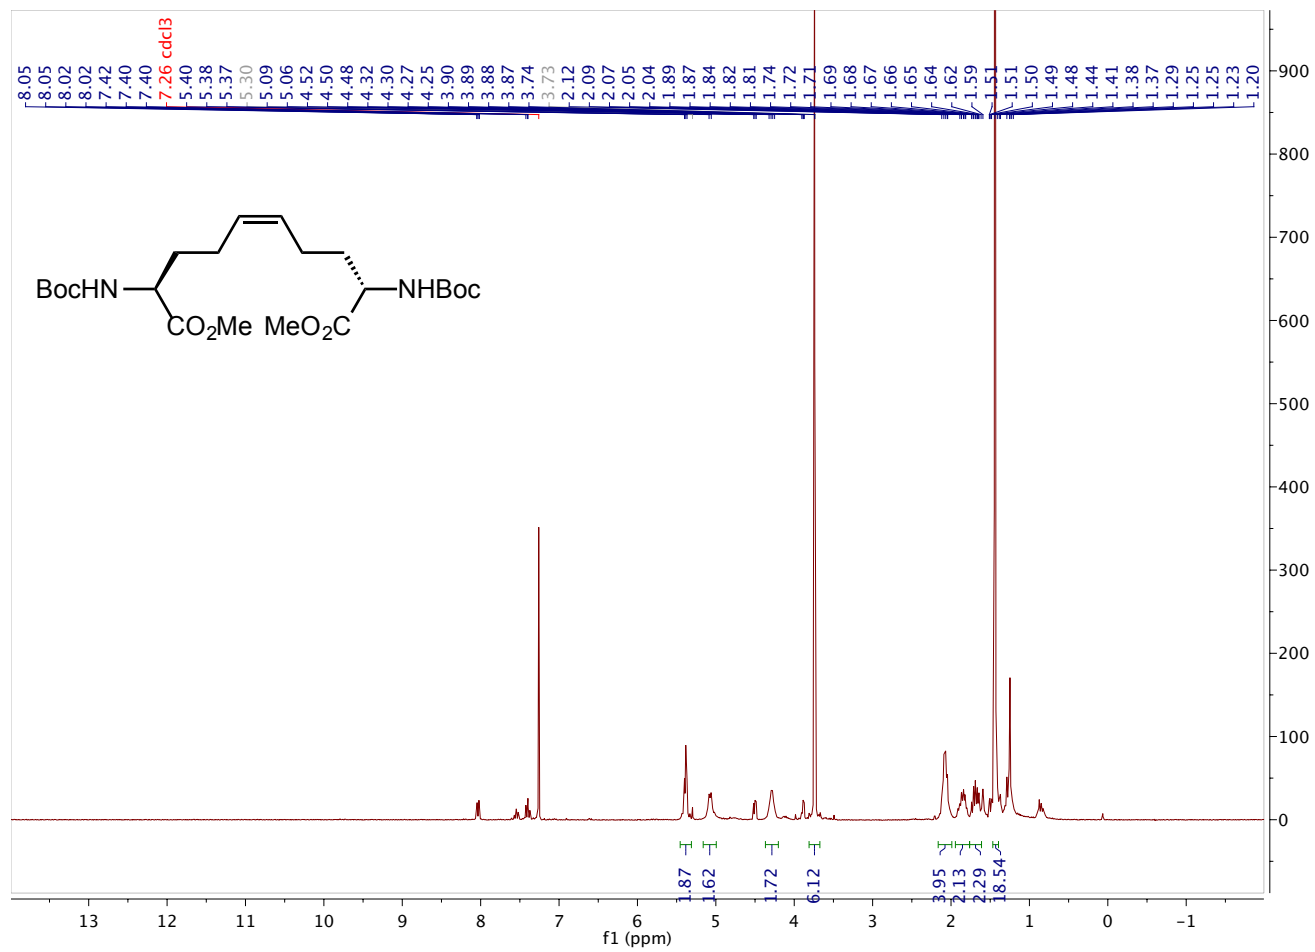

$^{13}\text{C}$  NMR (126 MHz,  $\text{CDCl}_3$ ) spectrum of compound **10b**

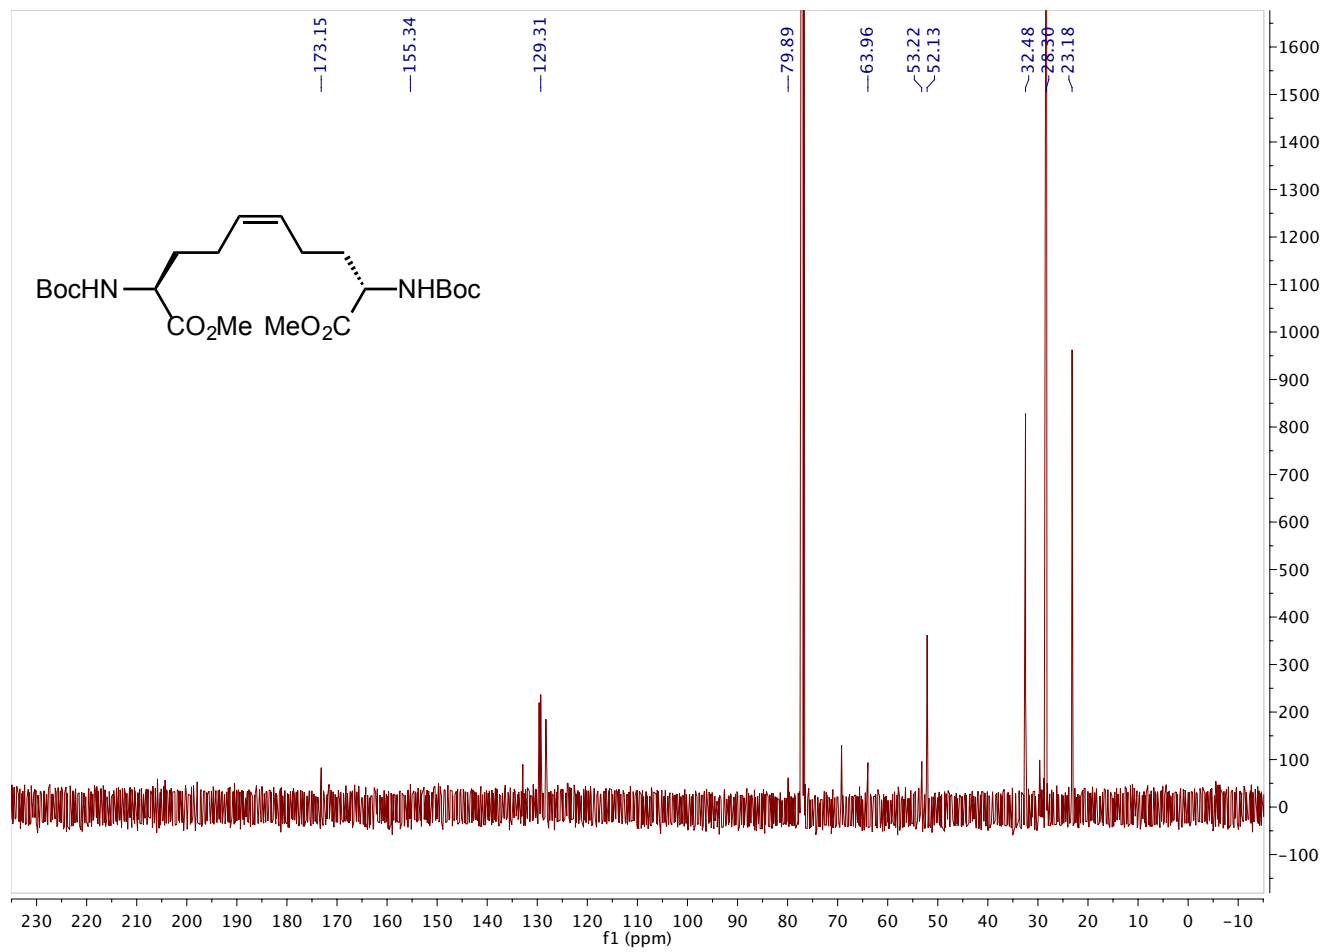

$^1\text{H}$  NMR (500 MHz,  $\text{CDCl}_3$ ) spectrum of compound **10c**

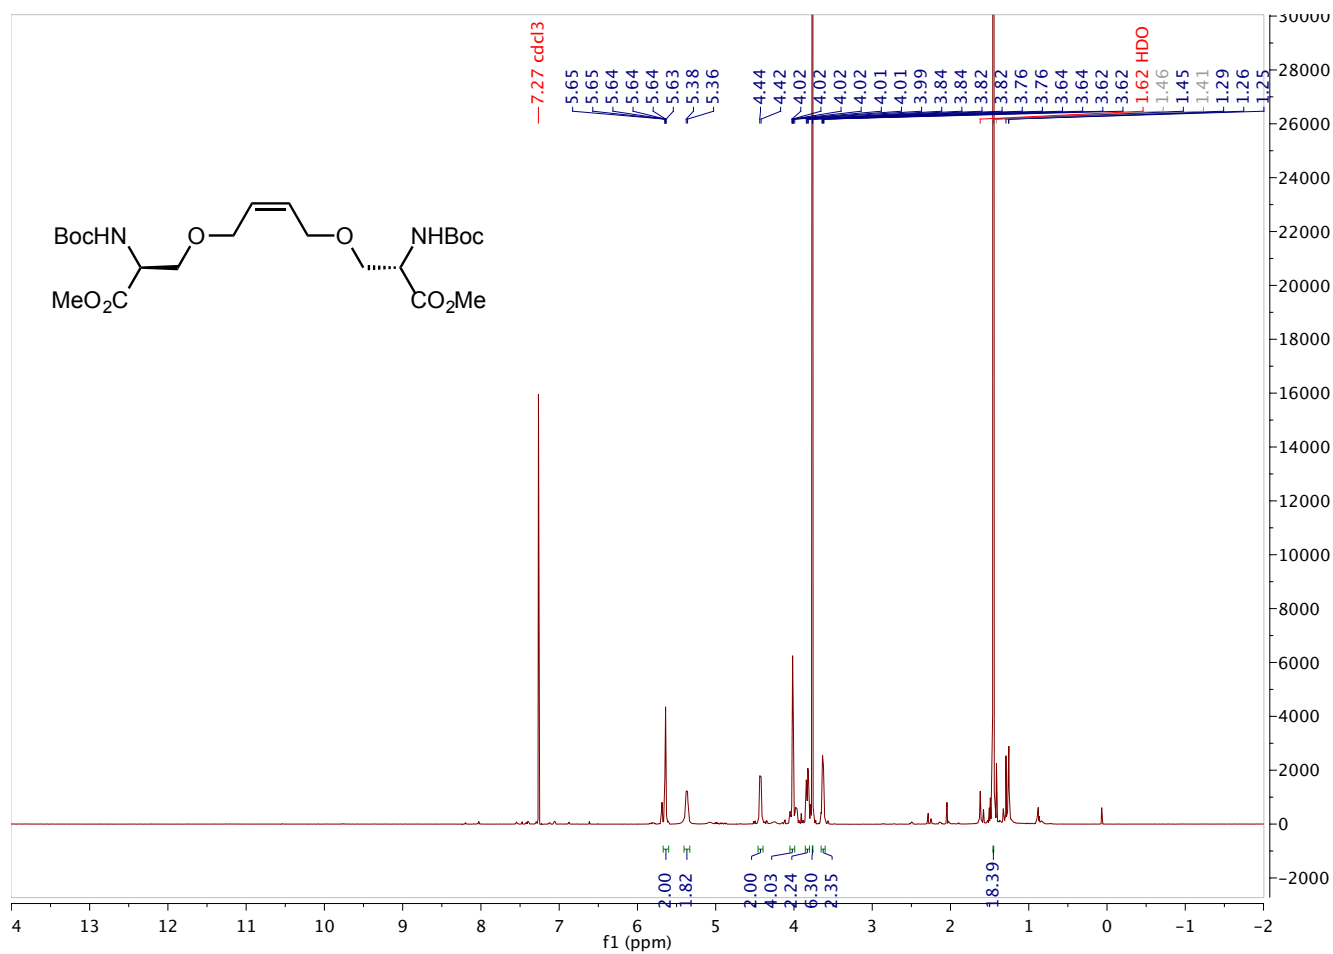

$^{13}\text{C}$  NMR (126 MHz,  $\text{CDCl}_3$ ) spectrum of compound **10c**

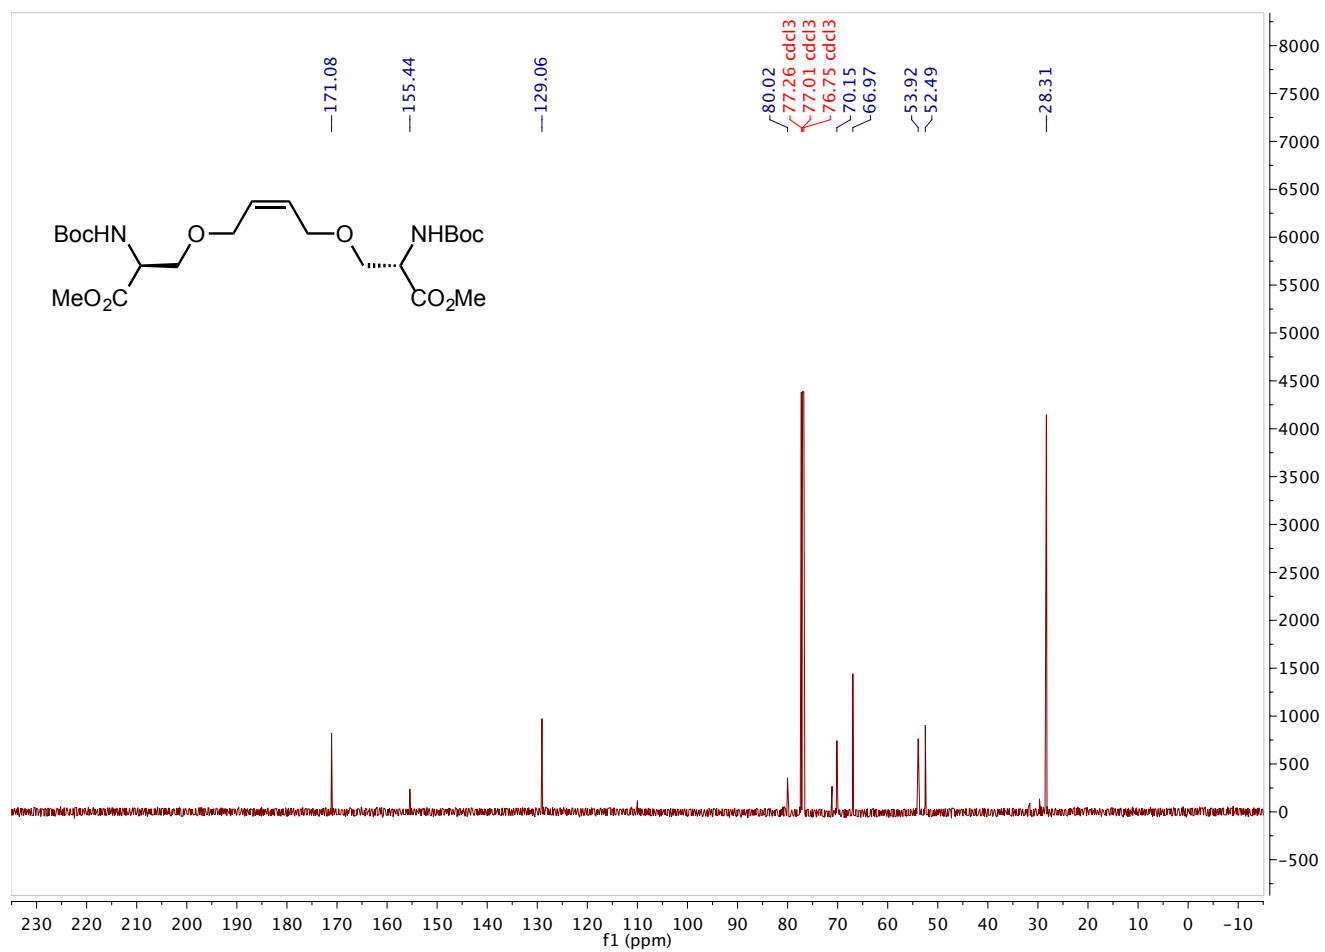



$^1\text{H}$  NMR (500 MHz,  $\text{CDCl}_3$ ) spectrum of compound **10d**

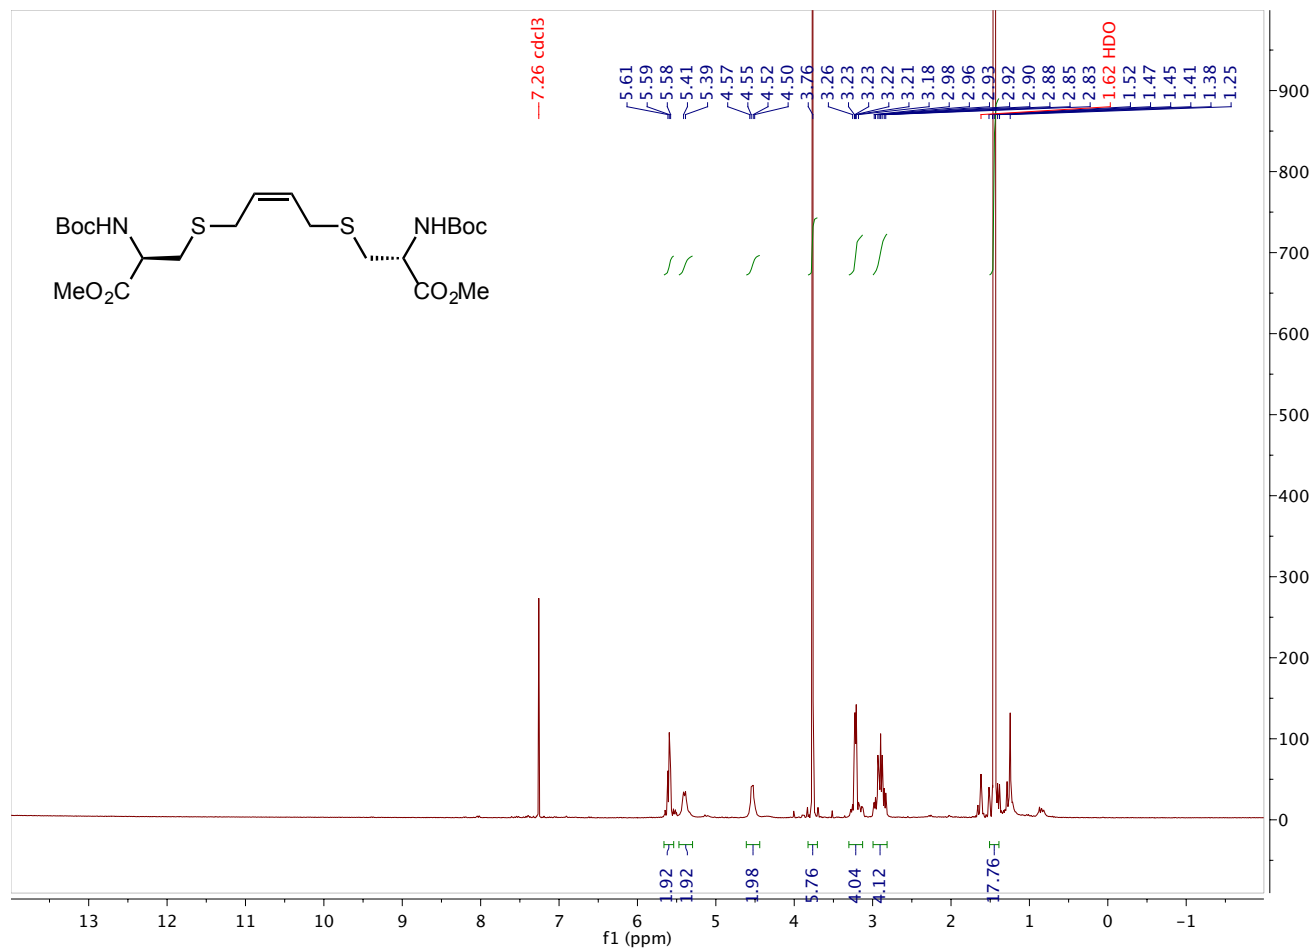

$^{13}\text{C}$  NMR (126 MHz,  $\text{CDCl}_3$ ) spectrum of compound **10d**

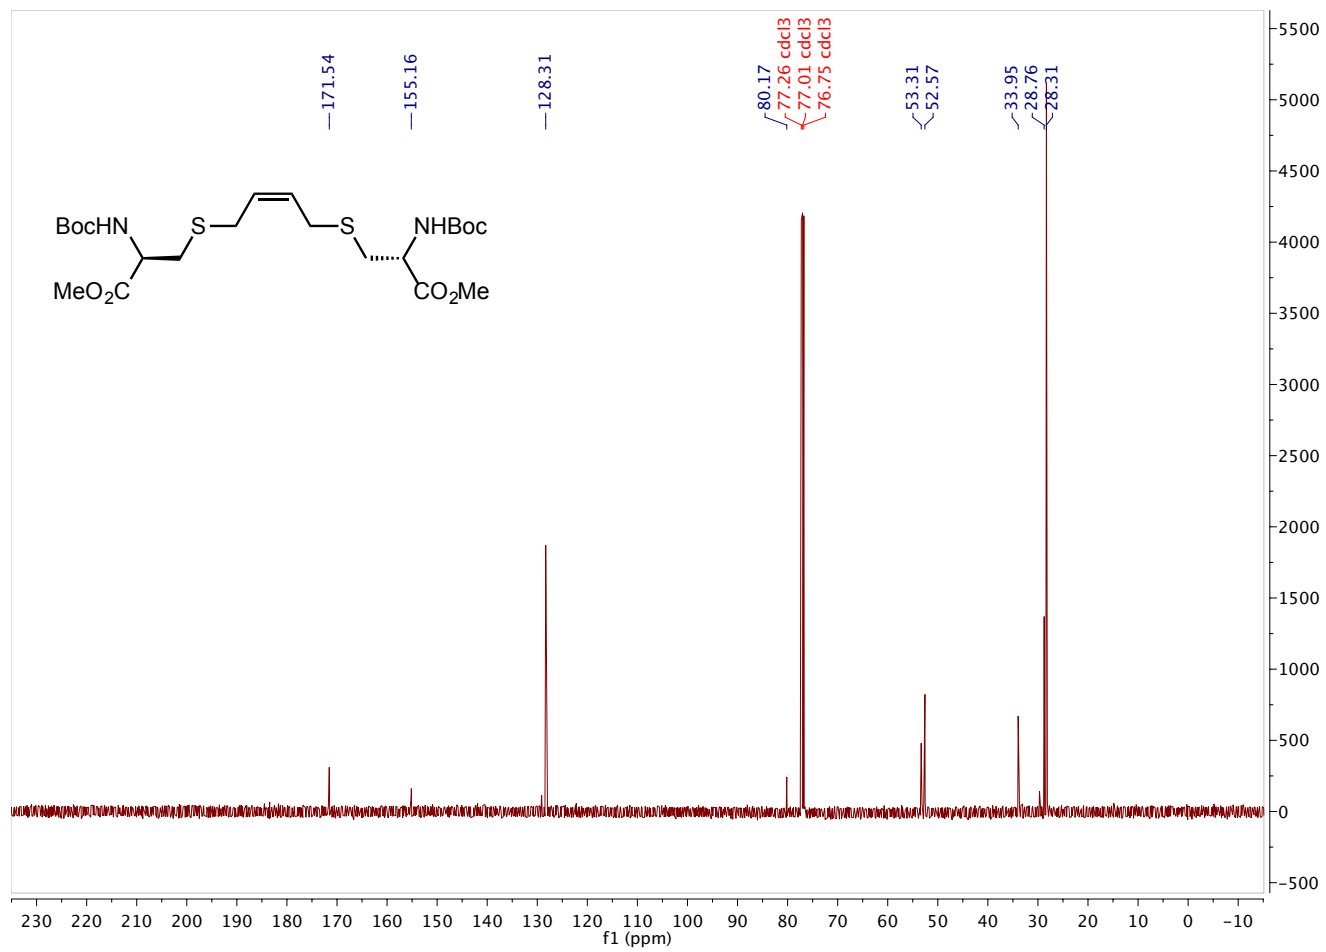

$^1\text{H}$  NMR (500 MHz,  $\text{CDCl}_3$ ) spectrum of compound **12a**

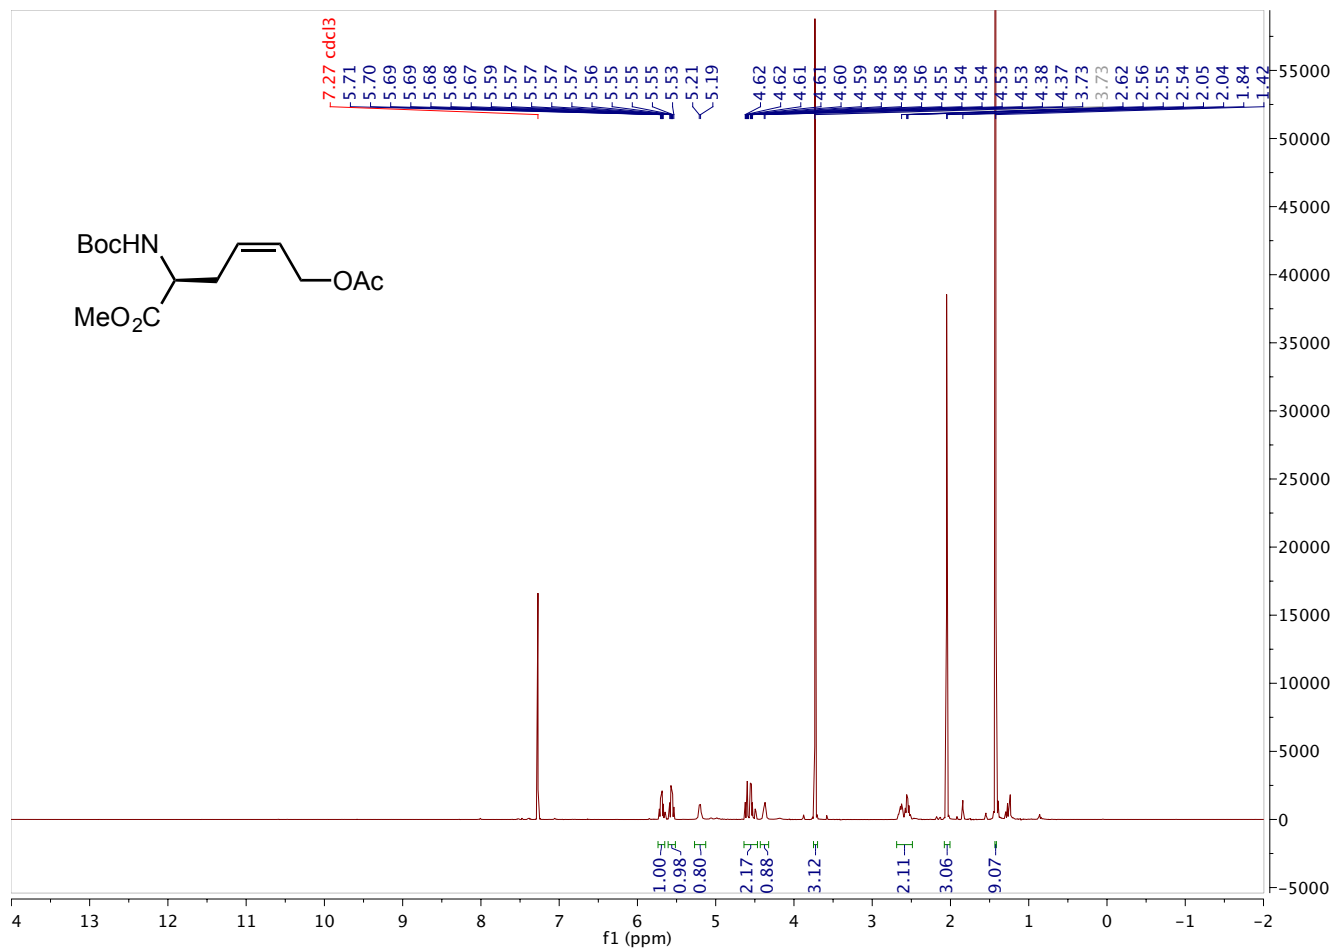

$^{13}\text{C}$  NMR (126 MHz,  $\text{CDCl}_3$ ) spectrum of compound **12a**

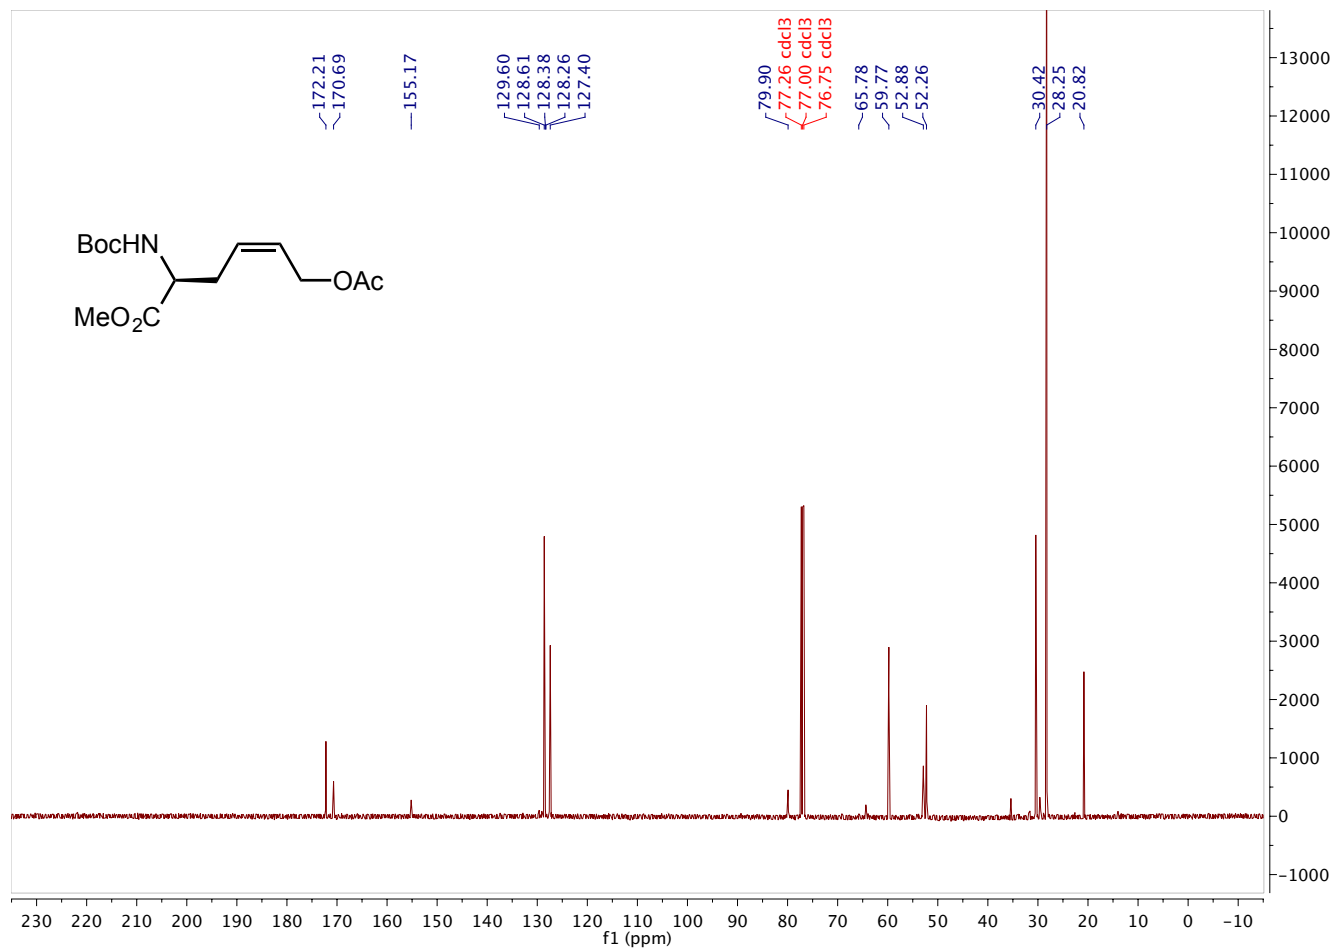

$^1\text{H}$  NMR (500 MHz,  $\text{CDCl}_3$ ) spectrum of compound **12b**

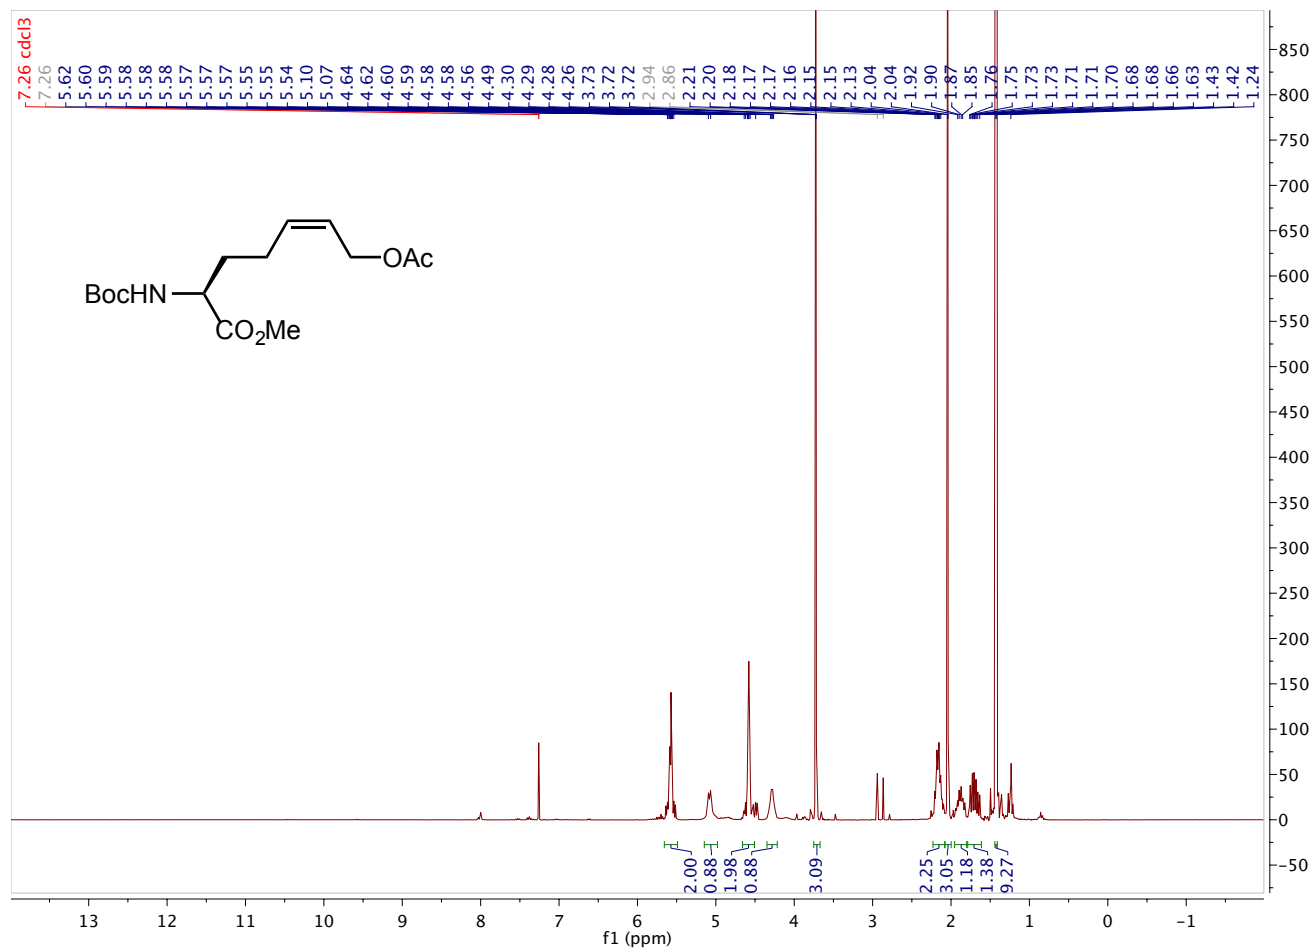

$^{13}\text{C}$  NMR (126 MHz,  $\text{CDCl}_3$ ) spectrum of compound **12b**

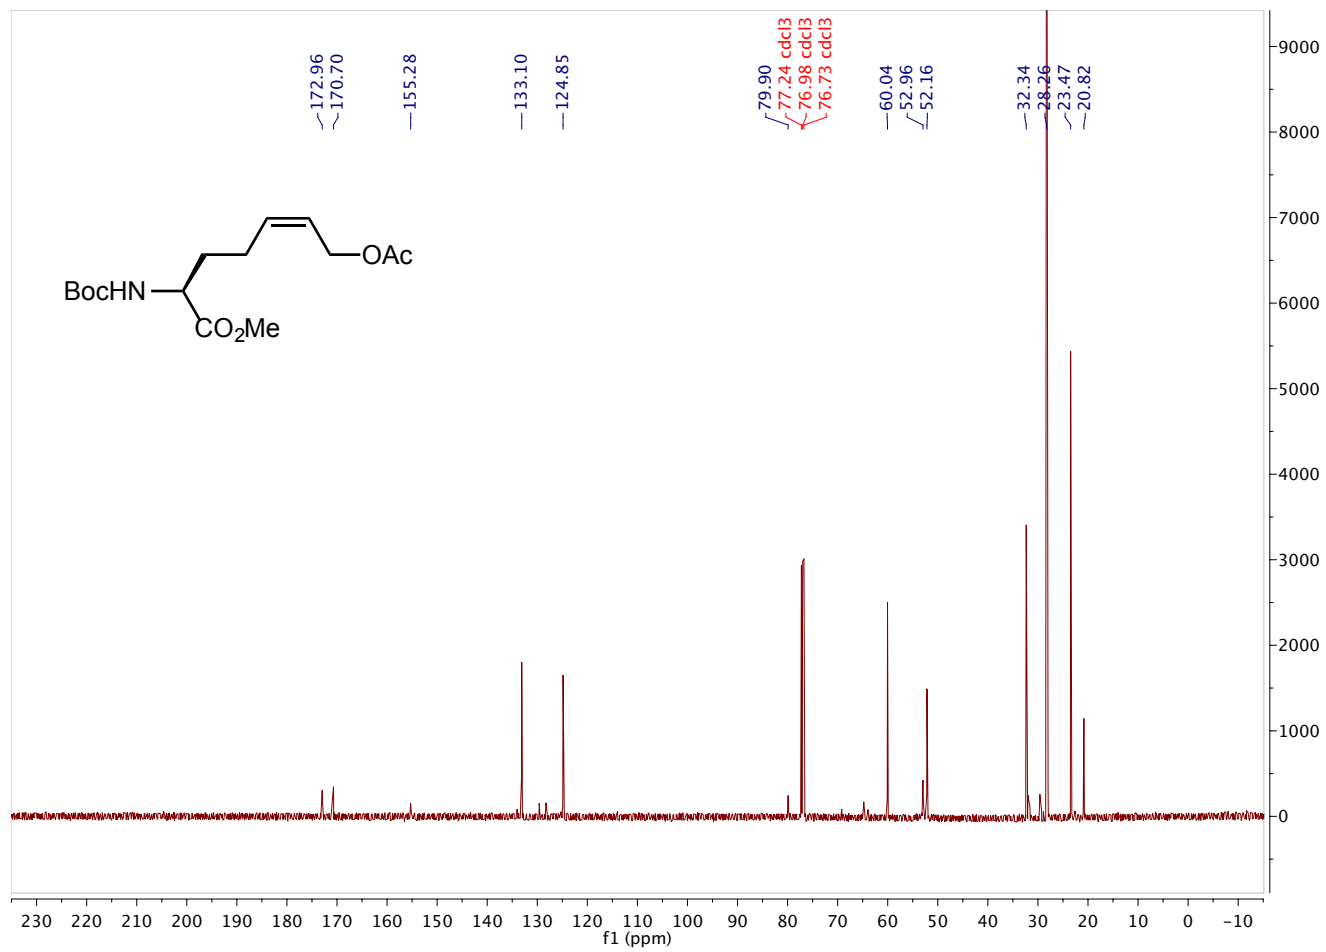

$^1\text{H}$  NMR (500 MHz,  $\text{CDCl}_3$ ) spectrum of compound **12c**

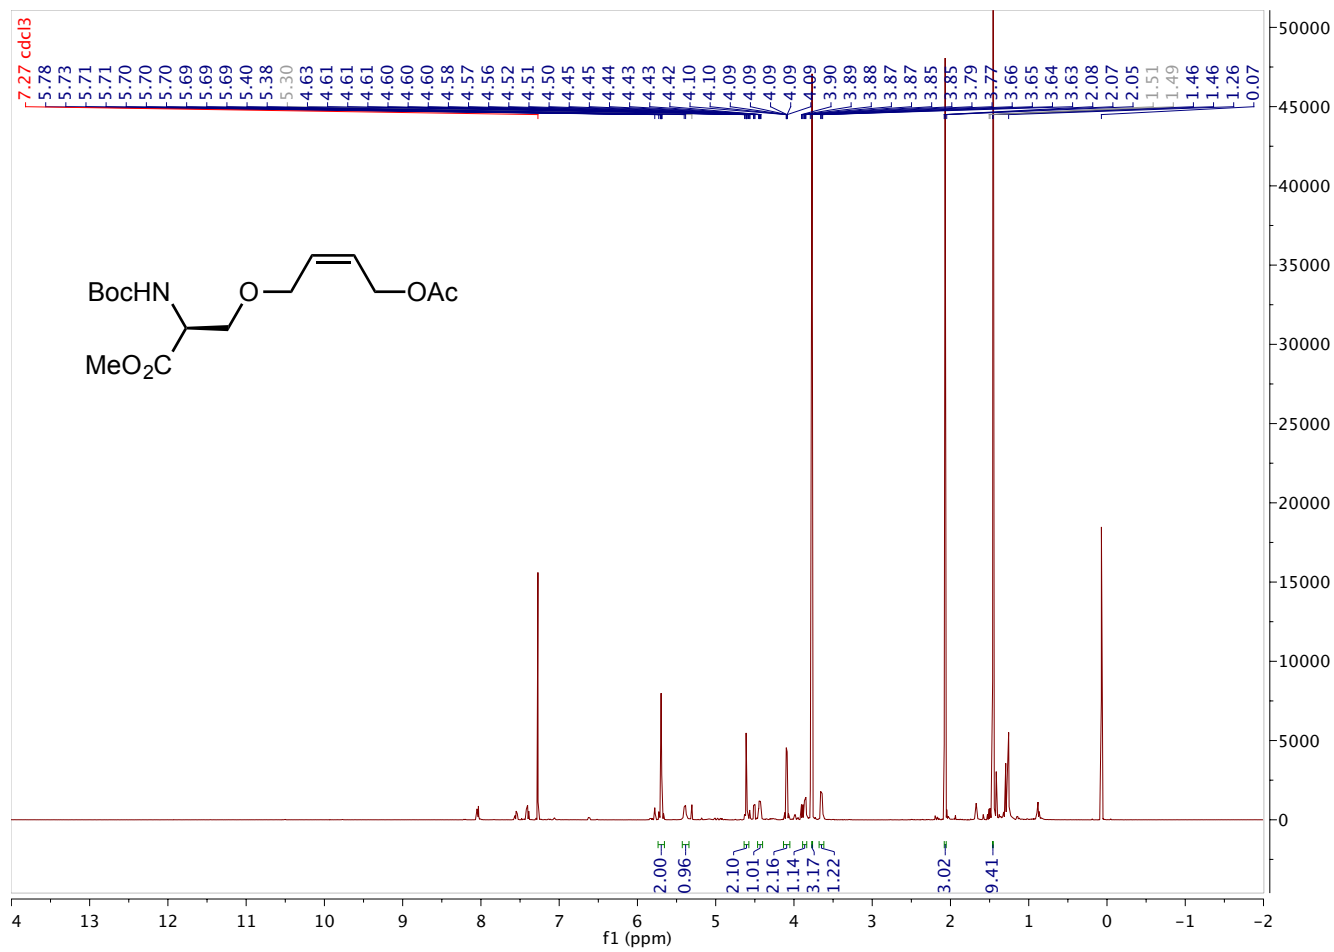

$^{13}\text{C}$  NMR (126 MHz,  $\text{CDCl}_3$ ) spectrum of compound **12c**

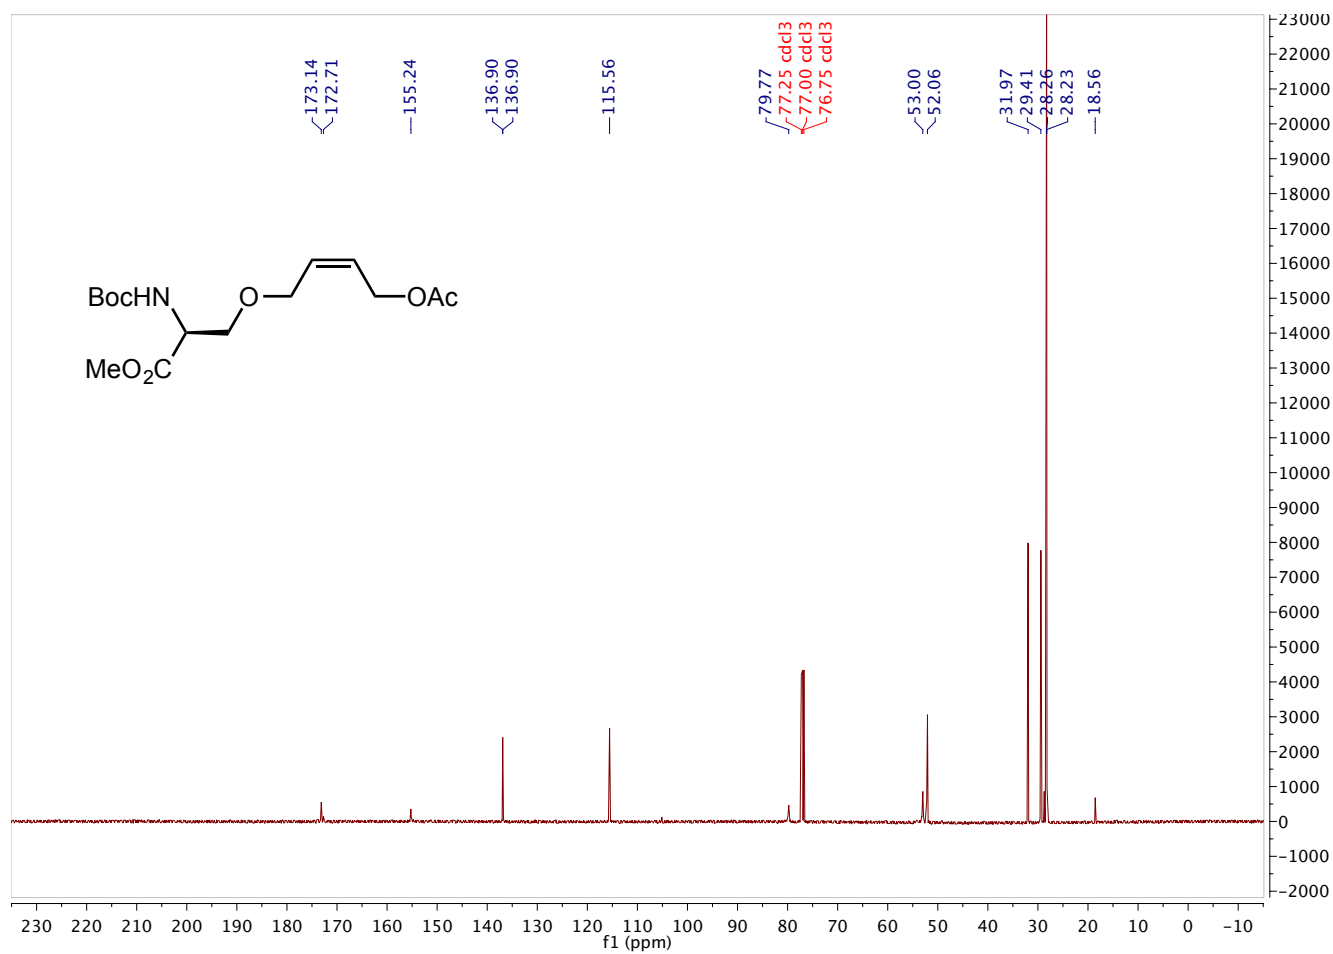



$^1\text{H}$  NMR (500 MHz,  $\text{CDCl}_3$ ) spectrum of compound **12d**

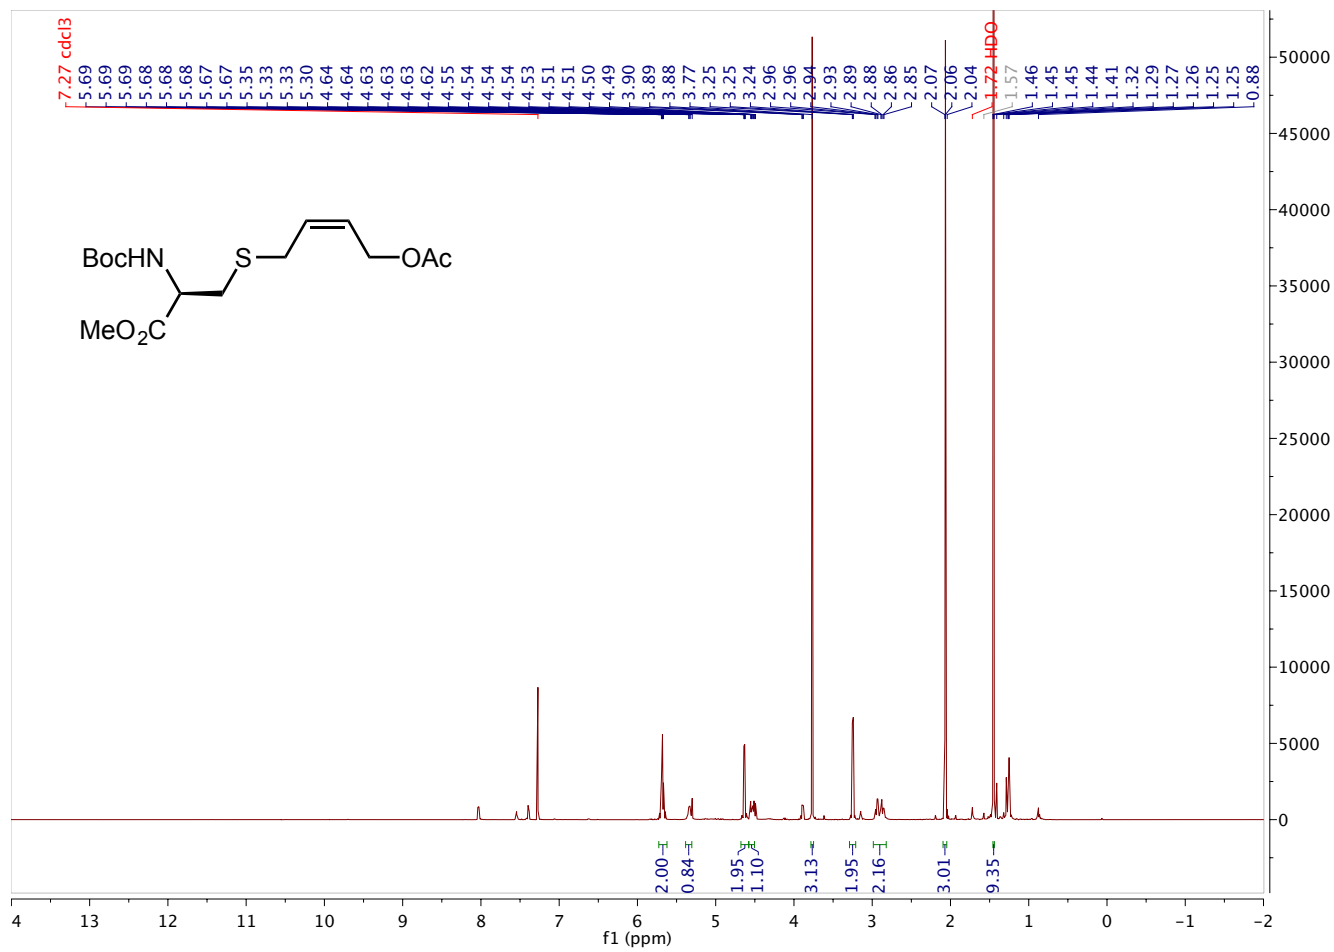

$^{13}\text{C}$  NMR (126 MHz,  $\text{CDCl}_3$ ) spectrum of compound **12d**

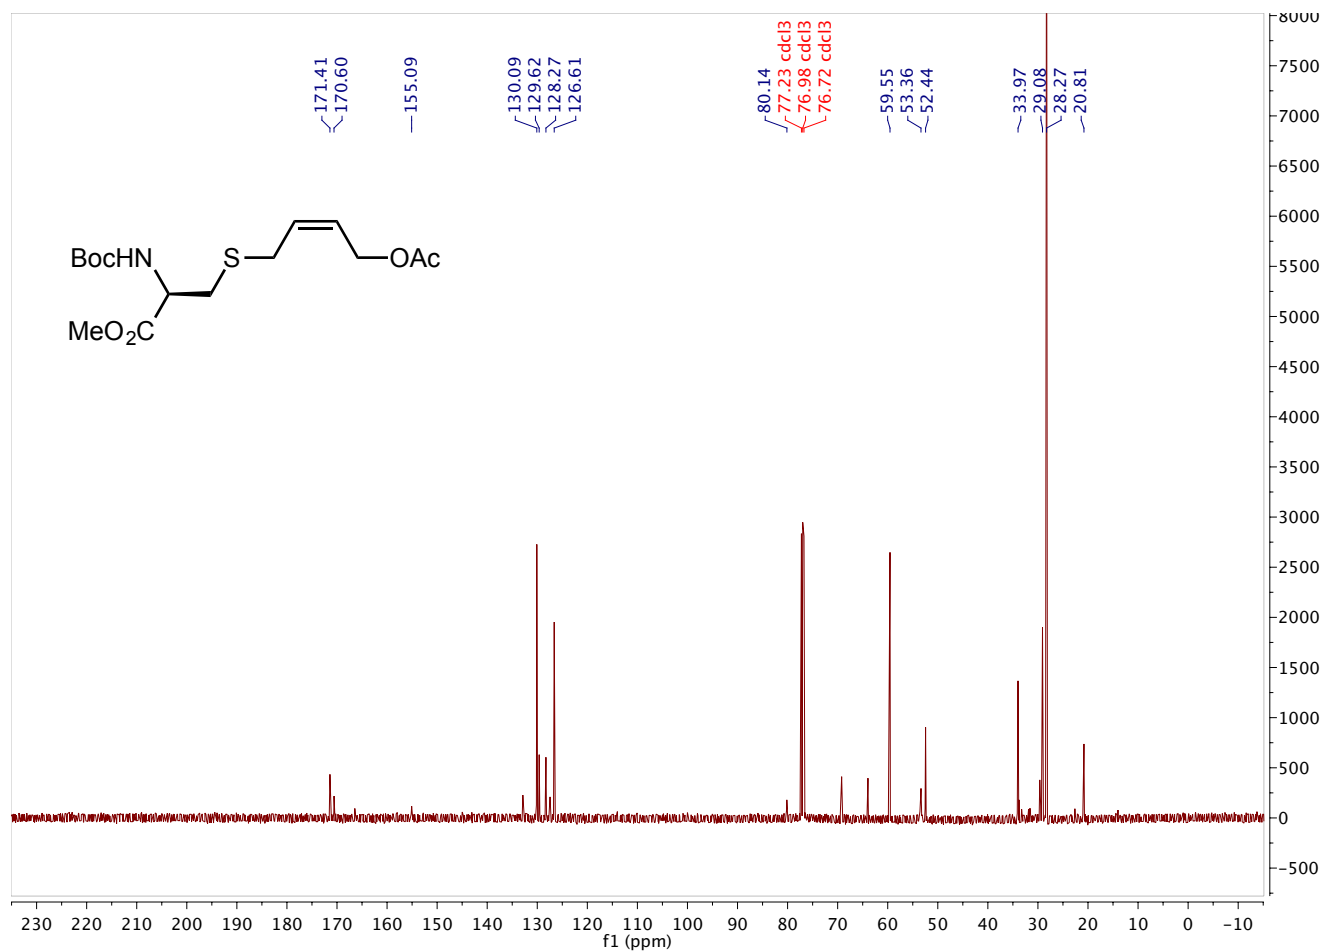

<sup>1</sup>H NMR (500 MHz, CDCl<sub>3</sub> + CD<sub>3</sub>OD) spectrum of compound **13**

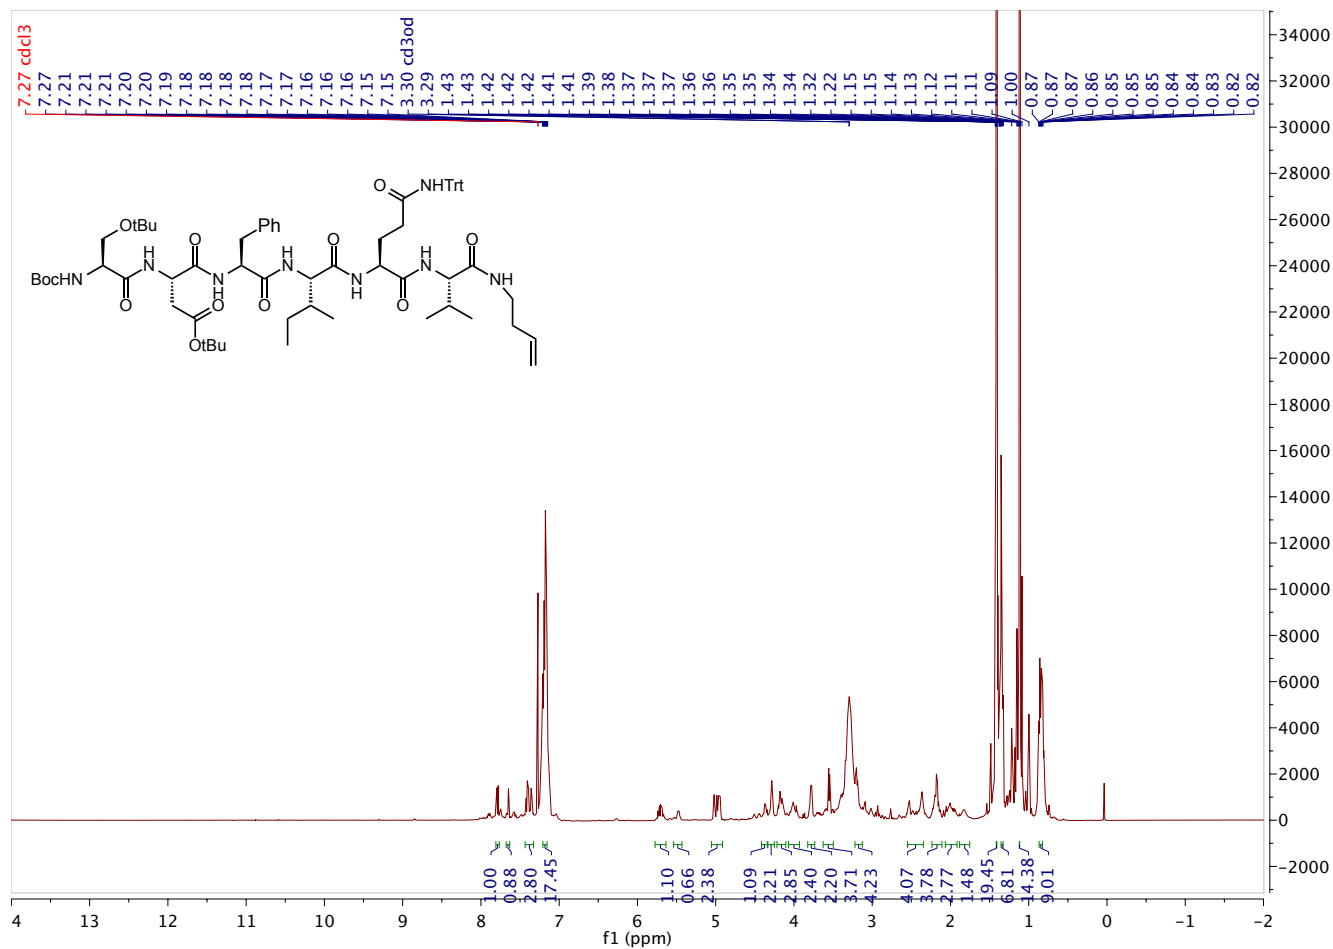

$^{13}\text{C}$  NMR (126 MHz,  $\text{CDCl}_3 + \text{CD}_3\text{OD}$ ) spectrum of compound **13**

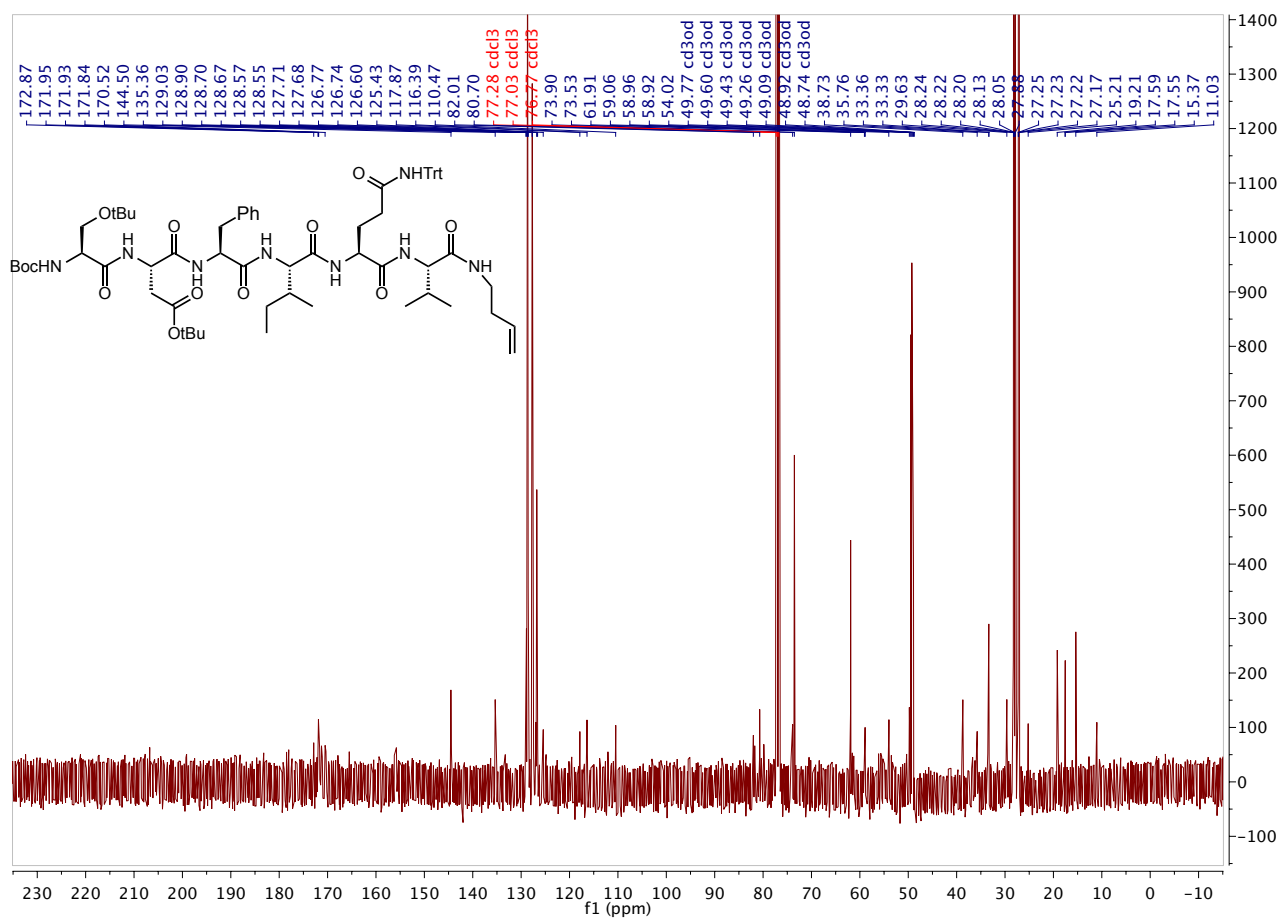

<sup>1</sup>H NMR (500 MHz, CDCl<sub>3</sub> + CD<sub>3</sub>OD) spectrum of compound **14**

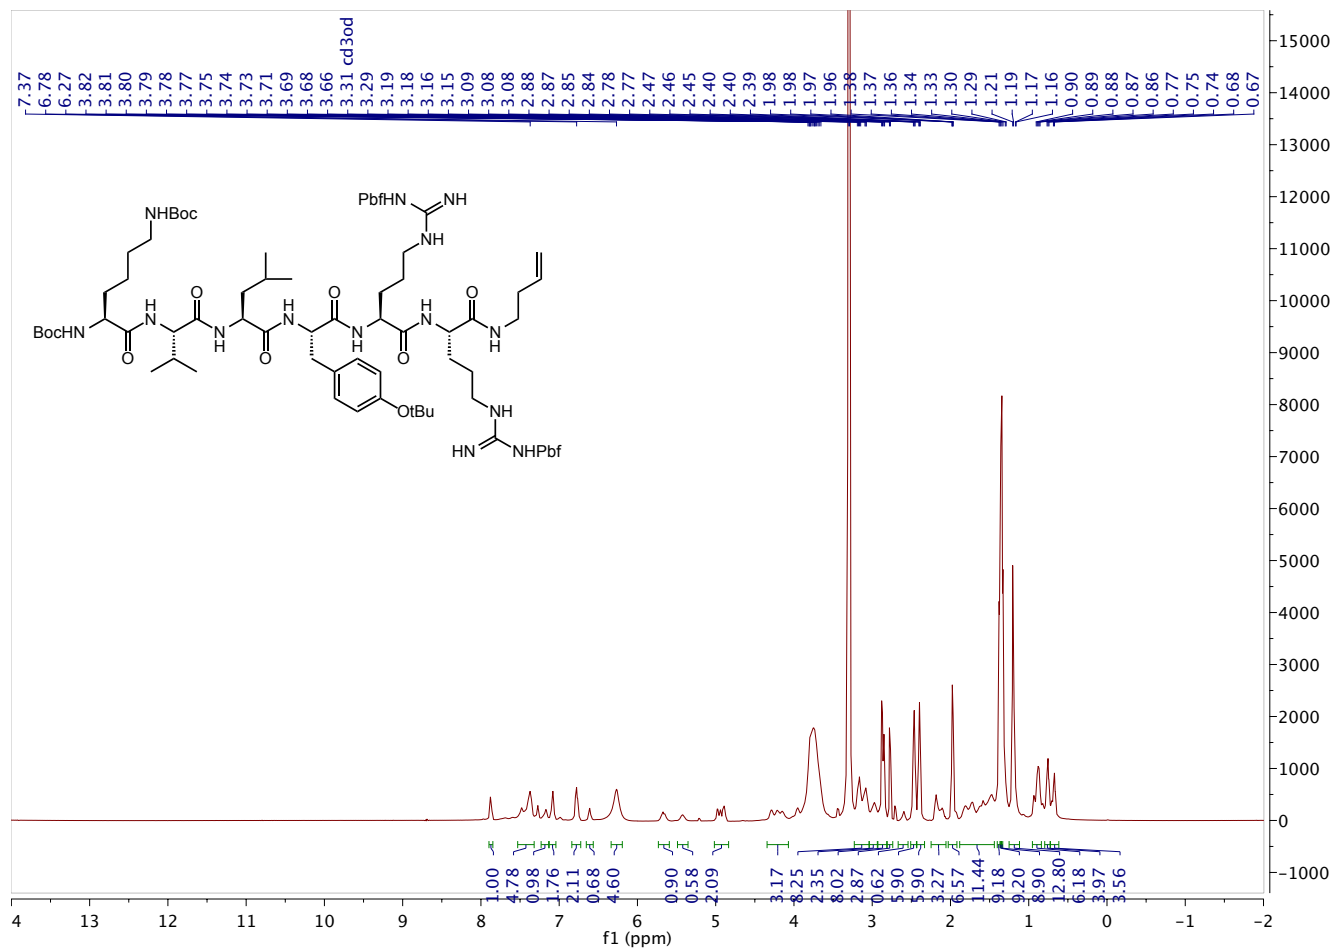

$^{13}\text{C}$  NMR (126 MHz,  $\text{CDCl}_3 + \text{CD}_3\text{OD}$ ) spectrum of compound **14**

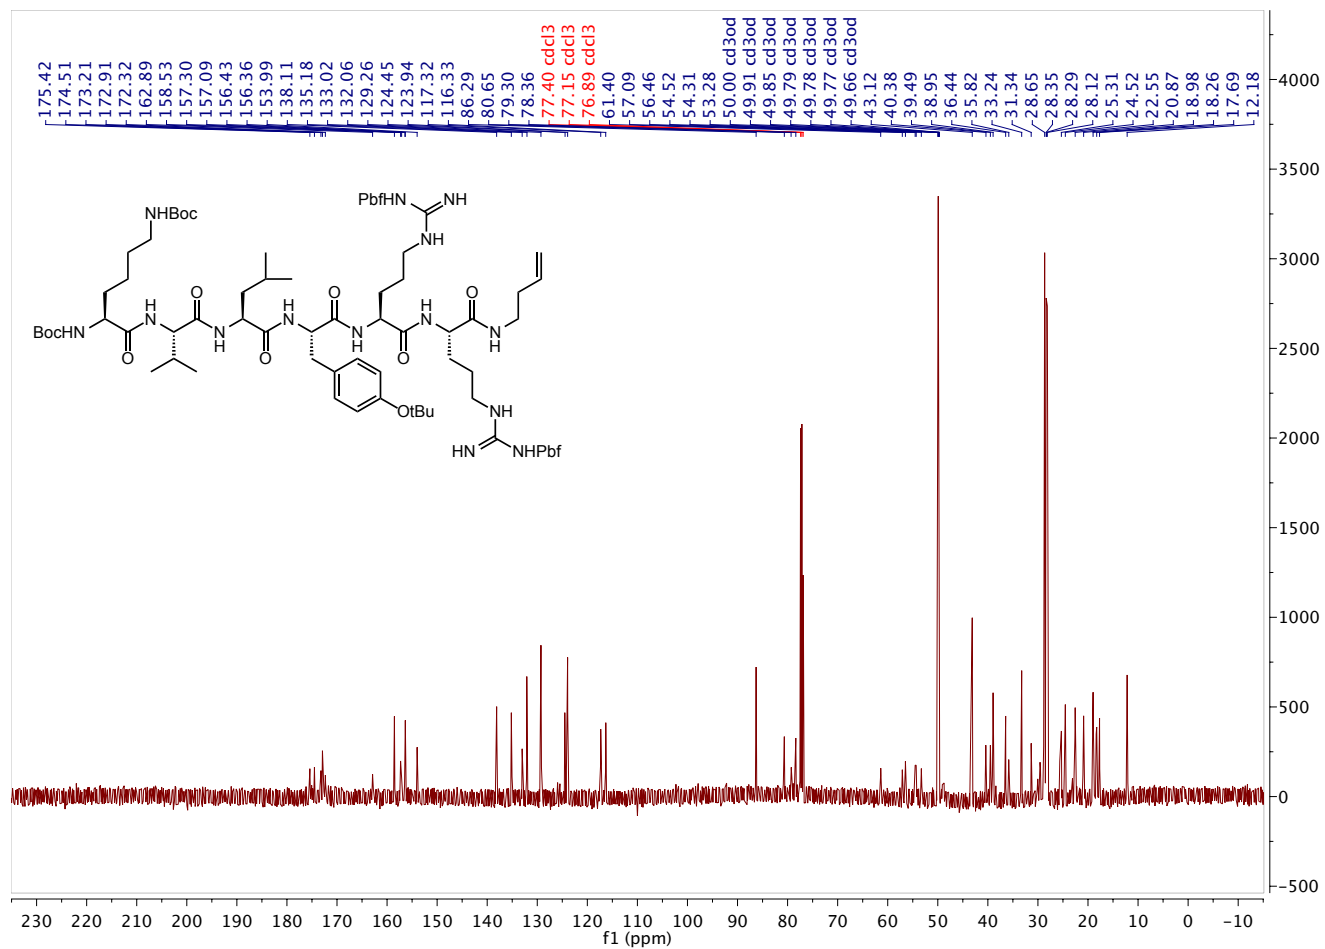

Supplement: ja507166g_si_001.pdf [file ja507166g_si_001.pdf]
